# Supplementary material for: C–O Coupling of Hydrazones with Diacetyliminoxyl Radical Leading to Azo Oxime Ethers—Novel Antifungal Agents
Source: MDPI journal article supplement (doi:10.3390/molecules28237863), 2023-11-30

## ***Supporting Information***

# **C–O Coupling of Hydrazones with Diacetyliminoxyl Radical Leading to Azo Oxime Ethers—Novel Antifungal Agents**

Alexander S. Budnikov,<sup>1,2</sup> Igor B. Krylov,<sup>1,2,3\*</sup> Mikhail I. Shevchenko,<sup>1,3</sup> O.O. Segida,<sup>1,2</sup>  
Andrey V. Lastovko,<sup>1</sup> Anna L. Alekseenko,<sup>1,3</sup> Alexey I. Ilovaisky,<sup>1,2</sup> Gennady I. Nikishin,<sup>1</sup>  
Alexander O. Terent'ev<sup>1,2,3\*</sup>

E-mail: krylovigor@yandex.ru; terentev@ioc.ac.ru

[1] N. D. Zelinsky Institute of Organic Chemistry, Russian Academy of Sciences, 47 Leninsky  
Prospekt, 119991 Moscow, Russia

[2] All-Russian Research Institute for Phytopathology, B. Vyazyomy, 143050 Moscow, Russian

[3] Higher Chemical College of the Russian Academy of Sciences, D. I. Mendeleev University of  
Chemical Technology of Russia, 9 Miusskaya Square, 125047 Moscow, Russian

## Table of contents

|                                                                                 |    |
|---------------------------------------------------------------------------------|----|
| General .....                                                                   | 3  |
| Characterization data of synthesized products .....                             | 3  |
| X-ray single-crystal diffraction: Structure determination of compound 3ag ..... | 13 |
| Computational details .....                                                     | 15 |
| References .....                                                                | 24 |
| The $^1\text{H}$ and $^{13}\text{C}$ spectra of synthesized compounds.....      | 26 |

## General

In all experiments RT stands for 22–25 °C.  $^1\text{H}$  and  $^{13}\text{C}$  NMR spectra were recorded on a Bruker AVANCE II 300 and Bruker Fourier 300HD (300.13 for  $^1\text{H}$  and 75.47 MHz for  $^{13}\text{C}$ , respectively) spectrometers in  $\text{CDCl}_3$ . Chemical shifts were reported in parts per million (ppm), and the residual solvent peak was used as an internal reference:  $^1\text{H}$  ( $\text{CDCl}_3$   $\delta$  = 7.26 ppm),  $^{13}\text{C}$  ( $\text{CDCl}_3$   $\delta$  = 77.16 ppm). Multiplicity was indicated as follows: s (singlet), d (doublet), t (triplet), q (quartet), m (multiplet). Coupling constants were reported in Hertz (Hz). FT-IR spectra were recorded on Bruker Alpha instrument. High resolution mass spectra (HR-MS) were measured on a Bruker maXis instrument using electrospray ionization (ESI). The measurements were performed in a positive ion mode (interface capillary voltage – 4500 V); mass range from  $m/z$  50 to  $m/z$  3000 Da; external calibration with Electrospray Calibrant Solution (Fluka). A syringe injection was used for all acetonitrile solutions (flow rate 3  $\mu\text{L}/\text{min}$ ). Nitrogen was applied as a dry gas; interface temperature was set at 180 °C.

Phenylhydrazine 97%, *p*-tolylhydrazine hydrochloride 98%, 4-chlorophenylhydrazine hydrochloride 97%, 4-(trifluoromethyl)phenylhydrazine 96%, 2-hydrazinopyridine 98%, 2,4-dinitrophenylhydrazine 97%, methylhydrazine 98%, acetophenone 98%, 4-methylacetophenone 95%, 4-nitroacetophenone 98%, 4-methoxyacetophenone 98%, 4-bromoacetophenone 98%, 2-hydroxyacetophenone 98%, propiophenone 99%, benzophenone 99%, benzaldehyde 98%, 4-chlorobenzaldehyde 98%, 4-methoxybenzaldehyde 99%, 4-heptanone 98%, 6-undecanone 97%, 5-hexen-2-one 98%, cyclobutanone 98%, cyclopentanone 99%, cyclohexanone 99%, acetaldehyde 99.5%, propionaldehyde 98%, isobutyraldehyde 99+%, pivaldehyde 96%, hexanal 96%. Hydrazones **2** were synthesized by condensation with corresponding carbonyl compounds.<sup>1–7</sup> Ketones and corresponding hydrazones **2l–n** were synthesized according published procedures.<sup>8–11</sup>  $\text{CH}_2\text{Cl}_2$  was distilled prior to use. Acetone was distilled over  $\text{KMnO}_4$ . Preparation of diacetylinoxyl radical is described earlier.<sup>12</sup> To a stirred solution of diacetyl oxime (258 mg, 2 mmol) in 4 mL of  $\text{CH}_2\text{Cl}_2$   $\text{Pb}(\text{OAc})_4$  (469 mg, 1.0 mmol) was added with vigorous stirring. Stirring was continued for 10 min, then the reaction mixture was chromatographed on silica gel using  $\text{CH}_2\text{Cl}_2$  as eluent. The fraction corresponding to the dark-red spot was collected, so that the volume of the fraction was 50 mL.

## Characterization data of synthesized products

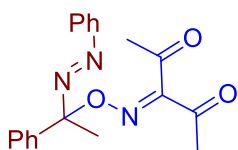

(*E*)-3-((1-phenyl-1-(phenyldiazenyl)ethoxy)imino)pentane-2,4-dione, **3aa** was synthesized as yellow oil (84%, purified by column chromatography with DCM as eluent).  $^1\text{H}$  NMR (300.13

MHz, CDCl<sub>3</sub>):  $\delta$  = 7.81 – 7.69 (m, 2H), 7.56 – 7.43 (m, 5H), 7.43 – 7.28 (m, 3H), 2.48 (s, 3H), 2.27 (s, 3H), 2.05 (s, 3H). <sup>13</sup>C NMR (75.47 MHz, CDCl<sub>3</sub>):  $\delta$  = 198.8, 194.7, 156.6, 151.6, 139.4, 131.6, 129.2, 128.7, 128.6, 126.5, 122.9, 105.2, 30.5, 25.9, 23.8. **FT-IR** (thin layer):  $\nu_{\max}$  = 1725, 1690, 1363, 960, 695. **HR-MS** (ESI):  $m/z$  = 360.1313, calcd. for C<sub>19</sub>H<sub>19</sub>N<sub>3</sub>O<sub>3</sub>+Na<sup>+</sup>: 360.1319.

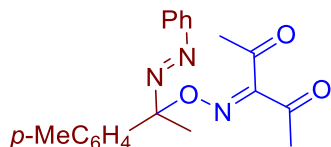

**(E)-3-((1-(phenyldiazenyl)-1-(p-tolyl)ethoxy)imino)pentane-2,4-dione, 3ab** was synthesized as yellow oil (96%, purified by column chromatography with DCM as eluent). <sup>1</sup>H NMR (300.13 MHz, CDCl<sub>3</sub>):  $\delta$  = 7.81 – 7.71 (m, 2H), 7.54 – 7.44 (m, 3H), 7.41 (d,  $J$  = 8.2 Hz, 2H), 7.19 (d,  $J$  = 8.2 Hz, 2H), 2.49 (s, 3H), 2.35 (s, 3H), 2.29 (s, 3H), 2.06 (s, 3H). <sup>13</sup>C NMR (75.47 MHz, CDCl<sub>3</sub>):  $\delta$  = 198.7, 194.7, 156.5, 151.6, 138.6, 136.4, 131.4, 129.24, 129.18, 126.5, 122.8, 105.2, 30.5, 25.8, 23.5, 21.2. **FT-IR** (thin layer):  $\nu_{\max}$  = 1725, 1687, 1363, 1305, 968. **HR-MS** (ESI):  $m/z$  = 352.1654, calcd. for C<sub>20</sub>H<sub>21</sub>N<sub>3</sub>O<sub>3</sub>+H<sup>+</sup>: 352.1656.

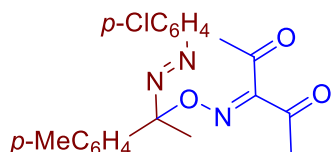

**(E)-3-((1-((4-chlorophenyl)diazenyl)-1-(p-tolyl)ethoxy)imino)pentane-2,4-dione, 3ac** was synthesized as yellow oil (81%, purified by column chromatography with DCM as eluent). <sup>1</sup>H NMR (300.13 MHz, CDCl<sub>3</sub>):  $\delta$  = 7.70 (d,  $J$  = 8.7 Hz, 2H), 7.44 (d,  $J$  = 8.7 Hz, 2H), 7.39 (d,  $J$  = 8.3 Hz, 2H), 7.19 (d,  $J$  = 8.3 Hz, 2H), 2.47 (s, 3H), 2.35 (s, 3H), 2.29 (s, 3H), 2.04 (s, 3H). <sup>13</sup>C NMR (75.47 MHz, CDCl<sub>3</sub>):  $\delta$  = 198.6, 194.6, 156.7, 149.9, 138.7, 137.5, 136.2, 129.4, 129.3, 126.4, 124.1, 105.3, 30.5, 25.8, 23.4, 21.2. **FT-IR** (thin layer):  $\nu_{\max}$  = 1726, 1690, 1362, 1300, 1088, 959. **HR-MS** (ESI):  $m/z$  = 386.1252, 388.1230, calcd. for C<sub>20</sub>H<sub>20</sub>ClN<sub>3</sub>O<sub>3</sub>+H<sup>+</sup>: 386.1266, 388.1238.

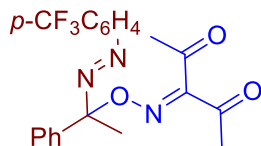

**(E)-3-((1-phenyl-1-((4-(trifluoromethyl)phenyl)diazenyl)ethoxy)imino)pentane-2,4-dione, 3ad** was synthesized as yellow oil (95%, purified by column chromatography with DCM as eluent). <sup>1</sup>H NMR (300.13 MHz, CDCl<sub>3</sub>):  $\delta$  = 7.85 (d,  $J$  = 8.4 Hz, 2H), 7.75 (d,  $J$  = 8.4 Hz, 2H), 7.58 – 7.49 (m, 2H), 7.47 – 7.32 (m, 3H), 2.49 (s, 3H), 2.29 (s, 3H), 2.10 (s, 3H). <sup>13</sup>C NMR (75.47 MHz, CDCl<sub>3</sub>):  $\delta$  = 198.5, 194.5, 156.7, 153.3, 138.8, 132.89 (q,  $J$  = 32.7 Hz), 128.9, 128.7, 126.42 (q,  $J$  = 3.6

Hz), 123.84 (q,  $J = 272.5$  Hz), 123.0, 105.5, 30.5, 25.7, 23.6. **FT-IR** (thin layer):  $\nu_{\max} = 1726, 1692, 1364, 1324, 1169, 1131, 1066, 959$ . **HR-MS** (ESI):  $m/z = 428.1198$ , calcd. for  $C_{20}H_{18}F_3N_3O_3+Na^+$ : 428.1192.

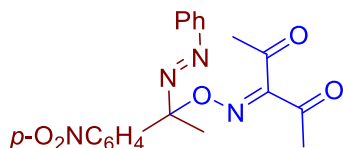

**(E)-3-((1-(4-nitrophenyl)-1-(phenyldiazenyl)ethoxy)imino)pentane-2,4-dione, 3ae** was synthesized as yellow oil (98%, purified by column chromatography with DCM as eluent).  **$^1H$  NMR** (300.13 MHz,  $CDCl_3$ ):  $\delta = 8.25$  (d,  $J = 8.9$  Hz, 2H), 7.81 – 7.67 (m, 4H), 7.56 – 7.45 (m, 3H), 2.48 (s, 3H), 2.24 (s, 3H), 2.03 (s, 3H).  **$^{13}C$  NMR** (75.47 MHz,  $CDCl_3$ ):  $\delta = 198.2, 194.3, 157.1, 151.3, 148.0, 146.6, 132.2, 129.4, 127.8, 123.8, 123.0, 104.1, 30.4, 25.9, 24.4$ . **FT-IR** (thin layer):  $\nu_{\max} = 1727, 1693, 1605, 1522, 1350, 1300, 1142, 1109, 1079, 1067, 958, 855, 769, 758, 693$ . **HR-MS** (ESI):  $m/z = 405.1161$ , calcd. for  $C_{19}H_{18}N_4O_5+Na^+$ : 405.1169.

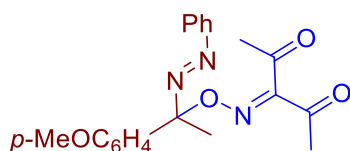

**(E)-3-((1-(4-methoxyphenyl)-1-(phenyldiazenyl)ethoxy)imino)pentane-2,4-dione, 3af** was synthesized as yellow oil (75%, purified by column chromatography with DCM as eluent).  **$^1H$  NMR** (300.13 MHz,  $CDCl_3$ ):  $\delta = 7.80$ –7.67 (m, 2H), 7.55–7.38 (m, 5H), 6.95–6.82 (m, 2H), 3.80 (s, 3H), 2.47 (s, 3H), 2.28 (s, 3H), 2.04 (s, 3H).  **$^{13}C$  NMR** (75.47 MHz,  $CDCl_3$ ):  $\delta = 198.8, 194.7, 159.9, 156.5, 151.6, 131.4, 129.2, 128.0, 122.8, 113.9, 105.1, 55.4, 30.5, 25.8, 23.3$ . **FT-IR** (thin layer):  $\nu_{\max} = 1725, 1690, 1608, 1514, 1363, 1303, 1253, 1185, 1109, 1030, 960, 834, 769$ . **HR-MS** (ESI):  $m/z = 390.1423$ , calcd. for  $C_{20}H_{21}N_3O_4+Na^+$ : 390.1424.

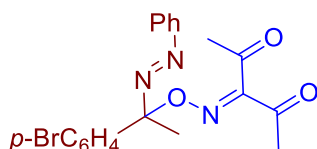

**(E)-3-((1-(4-bromophenyl)-1-(phenyldiazenyl)ethoxy)imino)pentane-2,4-dione, 3ag** was synthesized as yellow crystals (82%, purified by column chromatography with DCM as eluent). Mp = 90–91 °C.  **$^1H$  NMR** (300.13 MHz,  $CDCl_3$ ):  $\delta = 7.81$  – 7.70 (m, 2H), 7.55 – 7.45 (m, 5H), 7.44–7.35 (m, 2H), 2.47 (s, 3H), 2.27 (s, 3H), 2.01 (s, 3H).  **$^{13}C$  NMR** (75.47 MHz,  $CDCl_3$ ):  $\delta = 198.6, 194.6, 156.8, 151.4, 138.6, 131.8, 129.3, 128.4, 123.1, 122.9, 104.6, 102.8, 30.5, 25.9, 23.8$ . **FT-IR** (thin layer):  $\nu_{\max} = 1773, 1484, 1397, 1362, 1302, 1135, 1078, 1010, 966, 920, 828, 685, 550$ . **HR-MS** (ESI):  $m/z = 416.0608, 418.0592$ , calcd. for  $C_{19}H_{18}BrN_3O_3+H^+$ : 416.0604, 418.0585. Single crystal X-Ray analysis is available (see Fig. 1, page S15).

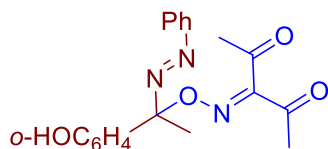

**(E)-3-((1-(2-hydroxyphenyl)-1-(phenyldiazenyl)ethoxy)imino)pentane-2,4-dione, 3ah** was synthesized as pale yellow solid (74%, purified by column chromatography with DCM as eluent) Mp = 103–104 °C. **<sup>1</sup>H NMR** (300.13 MHz, CDCl<sub>3</sub>): δ = 8.16 (s, 1H), 7.74–7.71 (m, 2H), 7.54–7.49 (m, 3H), 7.36–7.27 (m, 2H), 6.97–6.90 (m, 2H), 2.46 (s, 3H), 2.25 (s, 3H), 2.09 (s, 3H). **<sup>13</sup>C NMR** (75.47 MHz, CDCl<sub>3</sub>): δ = 198.2, 194.4, 157.0, 155.4, 150.9, 132.5, 131.3, 129.6, 127.3, 124.0, 123.0, 120.3, 118.5, 106.9, 30.6, 25.9, 22.8. **FT-IR** (thin layer): ν<sub>max</sub> = 1727, 1692, 1483, 1458, 1364, 1299, 1246, 1201, 1105, 957, 939, 76. **HR-MS** (ESI): *m/z* = 376.1260, calcd. For C<sub>19</sub>H<sub>19</sub>N<sub>3</sub>O<sub>4</sub>+Na<sup>+</sup> = 376.1268.

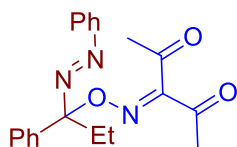

**(E)-3-((1-phenyl-1-(phenyldiazenyl)propoxy)imino)pentane-2,4-dione, 3ai** was synthesized as yellow oil (87%, purified by column chromatography with DCM as eluent). **<sup>1</sup>H NMR** (300.13 MHz, CDCl<sub>3</sub>): δ = 7.85–7.69 (m, 2H), 7.57–7.53 (m, 2H), 7.51–7.47 (m, 3H), 7.44–7.30 (m, 3H), 2.52 (s, 3H), 2.60 – 2.35 (m, 2H), 2.23 (s, 3H), 0.88 (t, *J* = 7.4 Hz, 3H). **<sup>13</sup>C NMR** (75.47 MHz, CDCl<sub>3</sub>): δ = 198.8, 194.7, 156.7, 151.6, 138.2, 131.4, 129.2, 128.5, 128.3, 126.9, 122.8, 106.9, 31.1, 30.3, 25.8, 7.7. **FT-IR** (thin layer): ν<sub>max</sub> = 2979, 1726, 1691, 1450, 1363, 1296, 1138, 1070, 963, 763, 699, 691. **HR-MS** (ESI): *m/z* = 374.1472, calcd. for C<sub>20</sub>H<sub>21</sub>N<sub>3</sub>O<sub>3</sub>+Na<sup>+</sup>: 374.1475.

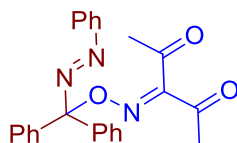

**(E)-3-((diphenyl(phenyldiazenyl)methoxy)imino)pentane-2,4-dione, 3aj** was synthesized as slightly yellow solid (98%, purified by column chromatography with DCM as eluent). Mp = 103–104 °C. **<sup>1</sup>H NMR** (300.13 MHz, CDCl<sub>3</sub>): δ = 7.86–7.75 (m, 2H), 7.58–7.45 (m, 7H), 7.43–7.30 (m, 6H), 2.56 (s, 3H), 2.05 (s, 3H). **<sup>13</sup>C NMR** (75.47 MHz, CDCl<sub>3</sub>): δ = 198.7, 194.7, 156.3, 151.5, 139.9, 131.6, 129.3, 128.6, 128.4, 128.0, 123.0, 105.6, 30.1, 25.7. **FT-IR** (thin layer): ν<sub>max</sub> = 1725, 1686, 1300, 1013, 976, 941, 762, 695. **HR-MS** (ESI): *m/z* = 422.1461, calcd. for C<sub>24</sub>H<sub>21</sub>N<sub>3</sub>O<sub>3</sub>+Na<sup>+</sup>: 422.1475.

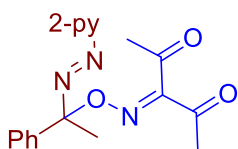

**(E)-3-((1-phenyl-1-(pyridin-2-yl)diazenyl)ethoxy)imino)pentane-2,4-dione, 3ak** was synthesized as yellow oil (89%, purified by column chromatography with PE/EtOAc = 2/5 as eluent). **<sup>1</sup>H NMR** (300.13 MHz, CDCl<sub>3</sub>): δ = 8.70 (d, *J* = 4.2 Hz, 1H), 7.85 (td, *J* = 7.7, 1.8 Hz, 1H), 7.60 – 7.48 (m, 3H), 7.46 – 7.29 (m, 4H), 2.48 (s, 3H), 2.28 (s, 3H), 2.12 (s, 3H). **<sup>13</sup>C NMR** (75.47 MHz, CDCl<sub>3</sub>): δ = 198.6, 194.6, 162.2, 156.8, 149.6, 138.6, 138.5, 129.0, 128.7, 126.5, 125.8, 114.3, 106.0, 30.6, 25.9, 23.5. **FT-IR** (thin layer): ν<sub>max</sub> = 1725, 1690, 1583, 1455, 1425, 1363, 1299, 1261, 1194, 1145, 1119, 1069, 955, 791, 770, 699. **HR-MS** (ESI): *m/z* = 339.1448, calcd. for C<sub>18</sub>H<sub>18</sub>N<sub>4</sub>O<sub>3</sub>+H<sup>+</sup>: 339.1452.

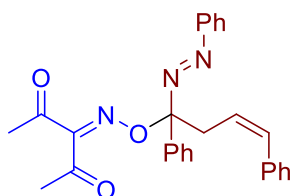

**3-(((Z)-1,4-diphenyl-1-((E)-phenyldiazenyl)but-3-en-1-yl)oxy)imino)pentane-2,4-dione, 3al** was synthesized as slightly yellow viscous gum (87%, purified by column chromatography with DCM as eluent). **<sup>1</sup>H NMR** (300.13 MHz, CDCl<sub>3</sub>): δ = 7.79–7.70 (m, 2H), 7.58–7.45 (m, 5H), 7.45–7.17 (m, 8H), 6.54 (d, *J* = 11.8 Hz, 1H), 5.58 (dt, *J* = 11.8, 7.2 Hz, 1H), 3.57 (dd, *J* = 7.2, 1.8 Hz, 2H), 2.50 (s, 3H), 1.98 (s, 3H). **<sup>13</sup>C NMR** (75.47 MHz, CDCl<sub>3</sub>): δ = 198.6, 194.7, 156.6, 151.5, 137.3, 137.2, 132.5, 131.6, 129.2, 128.74, 128.67, 128.61, 128.4, 127.0, 126.9, 124.9, 122.9, 106.3, 36.2, 30.3, 25.6. **FT-IR** (thin layer): ν<sub>max</sub> = 1725, 1690, 1600, 1494, 1449, 1363, 1301, 1193, 1059, 1018, 1003, 950, 765, 699. **HR-MS** (ESI): *m/z* = 462.1781, calcd. for C<sub>27</sub>H<sub>25</sub>N<sub>3</sub>O<sub>3</sub>+Na<sup>+</sup>: 462.1788.

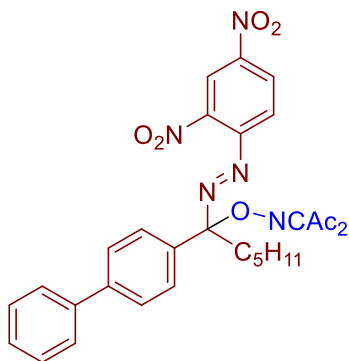

**(E)-3-(((1-([1,1'-biphenyl]-4-yl)-1-((2,4-dinitrophenyl)diazenyl)hexyl)oxy)imino)pentane-2,4-dione, 3am** was synthesized as viscous orange gum (46%, purified by column chromatography with DCM as eluent). **<sup>1</sup>H NMR** (300.13 MHz, CDCl<sub>3</sub>): δ = 8.83 (d, *J* = 2.3 Hz, 1H),

8.51 (dd,  $J = 8.7, 2.3$  Hz, 1H), 7.73 – 7.56 (m, 6H), 7.52–7.41 (m, 3H), 7.41–7.32 (m, 1H), 2.60–2.47 (m, 2H), 2.44 (s, 3H), 2.33 (s, 3H), 1.42–1.20 (m, 6H), 0.94 – 0.77 (m, 3H).  **$^{13}\text{C}$  NMR** (75.47 MHz,  $\text{CDCl}_3$ ):  $\delta = 198.5, 194.4, 157.1, 148.6, 148.1, 146.1, 141.7, 140.2, 135.6, 129.0, 128.4, 127.9, 127.5, 127.18, 127.15, 120.5, 120.3, 108.1, 37.3, 31.8, 30.2, 25.8, 22.6, 22.4, 14.0$ . **FT-IR** (thin layer):  $\nu_{\text{max}} = 3103, 2957, 2931, 2869, 1726, 1692, 1608, 1536, 1487, 1346, 1298, 1147, 954, 836, 766, 744, 698$ . **HR-MS** (ESI):  $m/z = 582.1955$ , calcd. for  $\text{C}_{29}\text{H}_{29}\text{N}_5\text{O}_7 + \text{Na}^+$ : 582.1959.

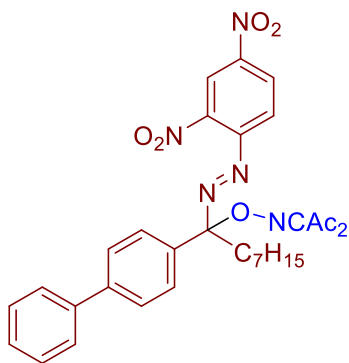

**(E)-3-(((1-([1,1'-biphenyl]-4-yl)-1-((2,4-dinitrophenyl)diazenyl)octyl)oxy)imino)pentane-2,4-dione, 3an** was synthesized as viscous orange gum (42%, purified by column chromatography with DCM as eluent).  **$^1\text{H}$  NMR** (300.13 MHz,  $\text{CDCl}_3$ ):  $\delta = 8.82$  (d,  $J = 2.3$  Hz, 1H), 8.51 (dd,  $J = 8.7, 2.3$  Hz, 1H), 7.78–7.55 (m, 6H), 7.54–7.40 (m, 3H), 7.39–7.29 (m, 1H), 2.66 – 2.49 (m, 2H), 2.45 (s, 3H), 2.34 (s, 3H), 1.55 – 1.09 (m, 10H), 0.86 (t,  $J = 6.5$  Hz, 3H).  **$^{13}\text{C}$  NMR** (75.47 MHz,  $\text{CDCl}_3$ ):  $\delta = 198.5, 194.4, 157.1, 148.6, 148.1, 146.1, 141.8, 140.2, 135.6, 129.0, 128.4, 127.9, 127.5, 127.2, 120.5, 120.3, 108.1, 37.4, 31.8, 30.3, 29.6, 29.1, 25.8, 23.0, 22.7, 14.2$ . **FT-IR** (thin layer):  $\nu_{\text{max}} = 1724, 1691, 1607, 1545, 1541, 1346, 1297, 1194, 1146, 963, 835, 766, 747, 698$ . **HR-MS** (ESI):  $m/z = 605.2712$ , calcd. for  $\text{C}_{31}\text{H}_{33}\text{N}_5\text{O}_7 + \text{H}^+$ : 605.2718.

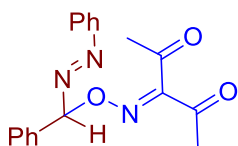

**(E)-3-((phenyl(phenyldiazenyl)methoxy)imino)pentane-2,4-dione, 3ba** was synthesized as yellow oil (79%, purified by column chromatography with DCM as eluent).  **$^1\text{H}$  NMR** (300.13 MHz,  $\text{CDCl}_3$ ):  $\delta = 7.79$ –7.76 (m, 2H), 7.55–7.51 (m, 2H), 7.50–7.47 (m, 3H), 7.44–7.39 (m, 3H), 6.50 (s, 1H), 2.46 (s, 3H), 2.35 (s, 3H).  **$^{13}\text{C}$  NMR** (75.47 MHz,  $\text{CDCl}_3$ ):  $\delta = 198.9, 194.4, 157.2, 151.6, 134.4, 131.9, 130.7, 129.8, 129.3, 129.0, 127.9, 123.7, 107.3, 30.6, 25.9$ . **FT-IR** (thin layer):  $\nu_{\text{max}} = 1725, 1693, 1453, 1419, 1360, 1195, 1098, 1019, 952, 766, 695$ . **HR-MS** (ESI):  $m/z = 346.1162$  calcd. For  $\text{C}_{18}\text{H}_{17}\text{N}_3\text{O}_3 + \text{Na}^+ = 346.1162$ .



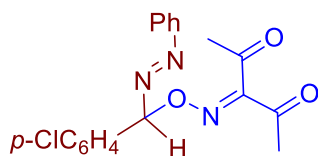

**(E)-3-(((4-chlorophenyl)(phenyldiazenyl)methoxy)imino)pentane-2,4-dione, 3bb** was synthesized as yellow powder (58%, purified by column chromatography with DCM as eluent). Mp = 49–50 °C.  $^1\text{H NMR}$  (300.13 MHz,  $\text{CDCl}_3$ ):  $\delta$  = 7.84–7.69 (m, 2H), 7.57–7.42 (m, 5H), 7.42–7.35 (m, 2H), 6.45 (s, 1H), 2.45 (s, 3H), 2.35 (s, 3H).  $^{13}\text{C NMR}$  (75.47 MHz,  $\text{CDCl}_3$ ):  $\delta$  = 197.7, 194.3, 157.3, 151.4, 135.9, 132.9, 132.1, 129.3, 129.23, 129.19, 123.1, 106.5, 30.6, 26.0. **FT-IR** (thin layer):  $\nu_{\text{max}}$  = 1725, 1697, 1488, 1413, 1363, 1296, 1091, 1049, 1019, 939, 821, 768, 691. **HR-MS** (ESI):  $m/z$  = 380.0770, calcd. for  $\text{C}_{18}\text{H}_{16}\text{ClN}_3\text{O}_3 + \text{Na}^+$ : 380.0772.

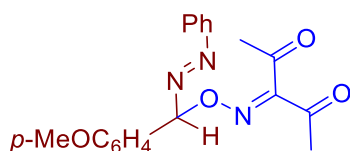

**(E)-3-(((4-methoxyphenyl)(phenyldiazenyl)methoxy)imino)pentane-2,4-dione, 3bc** was synthesized as yellow solid (88%, purified by column chromatography with DCM as eluent). Mp = 69–70 °C.  $^1\text{H NMR}$  (300 MHz,  $\text{CDCl}_3$ ):  $\delta$  = 7.81–7.69 (m, 2H), 7.51–7.38 (m, 5H), 6.98 – 6.89 (m, 2H), 6.44 (s, 1H), 3.81 (s, 3H), 2.45 (s, 3H), 2.35 (s, 3H).  $^{13}\text{C NMR}$  (76 MHz,  $\text{CDCl}_3$ ):  $\delta$  = 198.0, 194.5, 160.8, 157.0, 151.5, 131.8, 129.3, 129.2, 126.6, 123.0, 114.4, 107.2, 55.4, 30.6, 25.9. **FT-IR** (thin layer):  $\nu_{\text{max}}$  = 1725, 1692, 1515, 1360, 1300, 1253, 1027, 951. **HR-MS** (ESI):  $m/z$  = 376.1261 calcd. For  $\text{C}_{19}\text{H}_{19}\text{N}_3\text{O}_4 + \text{Na}^+$  = 376.1268.

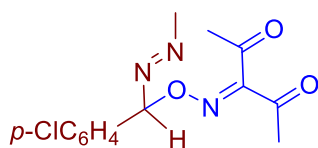

**(E)-3-(((4-chlorophenyl)(methyldiazenyl)methoxy)imino)pentane-2,4-dione, 3bd** was synthesized as yellow oil (68%, purified by column chromatography with DCM as eluent).  $^1\text{H NMR}$  (300.13 MHz,  $\text{DMSO}-d_6$ ):  $\delta$  = 7.53 (d,  $J$  = 8.6 Hz, 2H), 7.47 (d,  $J$  = 8.6 Hz, 1H), 6.36 (s, 1H), 3.85 (s, 3H), 2.35 (s, 3H), 2.32 (s, 3H).  $^{13}\text{C NMR}$  (75.47 MHz,  $\text{DMSO}-d_6$ ):  $\delta$  = 198.2, 193.7, 156.9, 134.5, 133.1, 129.5, 128.9, 104.5, 57.0, 30.1, 25.6. **FT-IR** (thin layer):  $\nu_{\text{max}}$  = 1727, 1693, 1493, 1363, 1298, 1090, 977, 950. **HR-MS** (ESI):  $m/z$  = 318.0611, calcd. for  $\text{C}_{13}\text{H}_{14}\text{ClN}_3\text{O}_3 + \text{Na}^+$ : 318.0616.

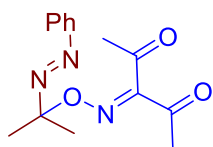

**(E)-3-(((2-(phenyldiazenyl)propan-2-yl)oxy)imino)pentane-2,4-dione, 3ca** was synthesized as yellow oil (85%, purified by column chromatography with DCM as eluent). **<sup>1</sup>H NMR** (300.13 MHz, CDCl<sub>3</sub>): δ = 7.76–7.67 (m, 2H), 7.52 – 7.43 (m, 3H), 2.44 (s, 3H), 2.35 (s, 3H), 1.62 (s, 6H). **<sup>13</sup>C NMR** (75.47 MHz, CDCl<sub>3</sub>): δ = 198.9, 194.8, 156.3, 151.6, 131.3, 129.2, 122.6, 104.7, 30.6, 25.8, 23.5. **FT-IR** (thin layer): ν<sub>max</sub> = 1726, 1690, 1384, 1303, 1196, 1173, 1145, 1070, 963, 767, 691. **HR-MS** (ESI): *m/z* = 298.1160, calcd. for C<sub>14</sub>H<sub>17</sub>N<sub>3</sub>O<sub>3</sub>+Na<sup>+</sup>: 298.1162.

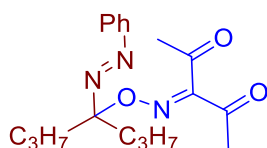

**(E)-3-(((4-(phenyldiazenyl)heptan-4-yl)oxy)imino)pentane-2,4-dione, 3cb** was synthesized as yellow oil (73%, purified by column chromatography with DCM as eluent). **<sup>1</sup>H NMR** (300.13 MHz, CDCl<sub>3</sub>): δ = 7.75–7.63 (m, 2H), 7.54–7.41 (m, 3H), 2.44 (s, 3H), 2.34 (s, 3H), 2.15–1.91 (m, 4H), 1.55 – 1.19 (m, 4H), 0.90 (t, *J* = 7.3 Hz, 6H). **<sup>13</sup>C NMR** (75.47 MHz, CDCl<sub>3</sub>): δ = 199.0, 194.8, 156.2, 151.6, 131.2, 129.2, 122.5, 107.5, 37.2, 30.4, 25.8, 16.3, 14.6. **FT-IR** (thin layer): ν<sub>max</sub> = 2964, 2934, 2875, 1726, 1690, 1363, 1303, 960, 768, 691. **HR-MS** (ESI): *m/z* = 354.1782, calcd. for C<sub>18</sub>H<sub>25</sub>N<sub>3</sub>O<sub>3</sub>+Na<sup>+</sup>: 354.1788.

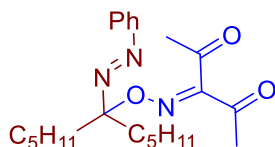

**(E)-3-(((6-(phenyldiazenyl)undecan-6-yl)oxy)imino)pentane-2,4-dione, 3cc** was synthesized as yellow oil (70%, purified by column chromatography with DCM as eluent). **<sup>1</sup>H NMR** (300.13 MHz, CDCl<sub>3</sub>): δ = 7.73–7.64 (m, 2H), 7.53–7.42 (m, 3H), 2.44 (s, 3H), 2.34 (s, 3H), 2.13–1.93 (m, 4H), 1.49–1.18 (m, 12H), 0.86 (t, *J* = 6.8 Hz, 6H). **<sup>13</sup>C NMR** (75.47 MHz, CDCl<sub>3</sub>): δ = 198.9, 194.8, 156.3, 151.7, 131.1, 129.2, 122.5, 107.6, 34.8, 32.2, 30.4, 25.8, 22.5, 22.4, 14.1. **FT-IR** (thin layer): ν<sub>max</sub> = 2957, 2932, 2870, 1727, 1692, 1363, 1301, 960, 767. **HR-MS** (ESI): *m/z* = 410.2402, calcd. for C<sub>22</sub>H<sub>33</sub>N<sub>3</sub>O<sub>3</sub>+Na<sup>+</sup>: 410.2414.

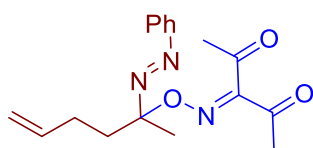

**(E)-3-(((2-(phenyldiazenyl)hex-5-en-2-yl)oxy)imino)pentane-2,4-dione, 3cd** was synthesized as slightly yellow viscous gum (79%, purified by column chromatography with PE/EA

= 10/1 as eluent). **<sup>1</sup>H NMR** (300.13 MHz, CDCl<sub>3</sub>): δ = 7.76–7.66 (m, 2H), 7.54–7.44 (m, 3H), 5.93–5.62 (m, 1H), 5.21–4.77 (m, 2H), 2.45 (s, 3H), 2.35 (s, 3H), 2.27 – 1.98 (m, 4H), 1.63 (s, 3H). **<sup>13</sup>C NMR** (75.47 MHz, CDCl<sub>3</sub>): δ = 198.9, 194.8, 156.4, 151.6, 137.7, 131.4, 129.2, 122.6, 115.1, 106.0, 36.4, 30.5, 27.4, 25.9, 21.4. **FT-IR** (thin layer): ν<sub>max</sub> = 1726, 1690, 1420, 1367, 1303, 982, 960, 826. **HR-MS** (ESI): *m/z* = 338.1475, calcd. for C<sub>17</sub>H<sub>21</sub>N<sub>3</sub>O<sub>3</sub>+Na<sup>+</sup>: 338.1475.

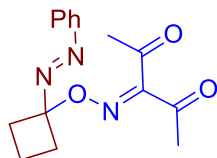

**(E)-3-(((1-(phenyldiazenyl)cyclobutoxy)imino)pentane-2,4-dione, 3ce** was synthesized as slightly yellow viscous gum (89%, purified by column chromatography with DCM as eluent). **<sup>1</sup>H NMR** (300.13 MHz, CDCl<sub>3</sub>): δ = 7.81–7.70 (m, 2H), 7.56–7.42 (m, 3H), 2.69–2.50 (m, 4H), 2.46 (s, 3H), 2.35 (s, 3H), 2.09–1.84 (m, 2H). **<sup>13</sup>C NMR** (75.47 MHz, CDCl<sub>3</sub>): δ = 198.7, 194.7, 157.3, 151.7, 131.4, 129.2, 122.8, 105.2, 31.9, 30.7, 25.9, 12.0. **FT-IR** (thin layer): ν<sub>max</sub> = 1727, 1690, 1364, 1304, 1251, 1143, 954, 768, 690. **HR-MS** (ESI): *m/z* = 310.1163, calcd. for C<sub>15</sub>H<sub>17</sub>N<sub>3</sub>O<sub>3</sub>+Na<sup>+</sup>: 310.1162.

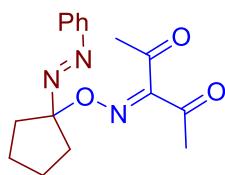

**(E)-3-(((1-(phenyldiazenyl)cyclopentyl)oxy)imino)pentane-2,4-dione, 3cf** was synthesized as slightly yellow viscous gum (82%, purified by column chromatography with DCM as eluent). **<sup>1</sup>H NMR** (300.13 MHz, CDCl<sub>3</sub>): δ = 7.78–7.63 (m, 2H), 7.55–7.40 (m, 3H), 2.44 (s, 3H), 2.35 (s, 3H), 2.30–2.12 (m, 4H), 1.96–1.81 (m, 4H). **<sup>13</sup>C NMR** (75.47 MHz, CDCl<sub>3</sub>): δ = 198.8, 194.8, 156.8, 151.7, 131.2, 129.2, 122.6, 115.6, 36.4, 30.5, 25.9, 24.8. **FT-IR** (thin layer): ν<sub>max</sub> = 2959, 1725, 1685, 1363, 1302, 1188, 959, 766, 690. **HR-MS** (ESI): *m/z* = 340.1059, calcd. for C<sub>16</sub>H<sub>19</sub>N<sub>3</sub>O<sub>3</sub>+K<sup>+</sup>: 340.1058.

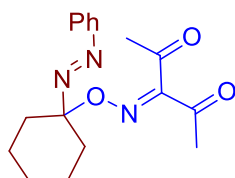

**(E)-3-(((1-(phenyldiazenyl)cyclohexyl)oxy)imino)pentane-2,4-dione, 3cg** was synthesized as slightly yellow viscous gum (89%, purified by column chromatography with DCM as eluent). **<sup>1</sup>H NMR** (300.13 MHz, CDCl<sub>3</sub>): δ = 7.74–7.64 (m, 2H), 7.55–7.39 (m, 3H), 2.46 (s, 3H), 2.45 (s, 3H), 2.19–2.06 (m, 2H), 1.92–1.68 (m, 5H), 1.67–1.46 (m, 2H), 1.45–1.27 (m, 1H). **<sup>13</sup>C NMR**

(75.47 MHz, CDCl<sub>3</sub>):  $\delta$  = 198.9, 194.8, 156.6, 151.7, 131.2, 129.2, 122.6, 105.2, 32.1, 30.6, 25.9, 25.0, 21.9. **FT-IR** (thin layer):  $\nu_{\text{max}}$  = 2938, 2863, 1727, 1689, 1599, 1450, 1420, 1363, 1304, 1275, 1256, 1195, 1159, 1146, 1069, 1023, 983, 960, 928, 911, 766, 691. **HR-MS** (ESI):  $m/z$  = 316.1654, calcd. for C<sub>17</sub>H<sub>21</sub>N<sub>3</sub>O<sub>3</sub>+H<sup>+</sup>: 316.1656.

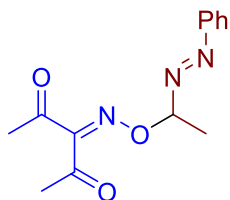

**(E)-3-((1-(phenyldiazenyl)ethoxy)imino)pentane-2,4-dione, 3da** was synthesized as pale brown gum (74%, purified by column chromatography with DCM as eluent). **<sup>1</sup>H NMR** (300 MHz, CDCl<sub>3</sub>):  $\delta$  = 7.79–7.69 (m, 2H), 7.54–7.44 (m, 3H), 5.67 (q,  $J$  = 6.3 Hz, 1H), 2.45 (s, 3H), 2.34 (s, 3H), 1.59 (d,  $J$  = 6.3 Hz, 3H). **<sup>13</sup>C NMR** (75 MHz, CDCl<sub>3</sub>)  $\delta$  = 198.2, 194.5, 156.8, 151.5, 131.7, 129.3, 122.8, 103.5, 30.6, 25.9, 17.5. **FT-IR** (thin layer):  $\nu_{\text{max}}$  = 1727, 1691, 1365, 1299, 1107, 1088, 1060, 965, 770, 691. **HR-MS** (ESI):  $m/z$  = 300.0733, calcd. for C<sub>13</sub>H<sub>15</sub>N<sub>3</sub>O<sub>3</sub>+K<sup>+</sup>: 300.0745.

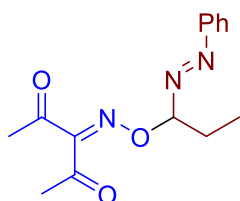

**(E)-3-((1-(phenyldiazenyl)propoxy)imino)pentane-2,4-dione, 3db** was synthesized as pale yellow gum (59%, purified by column chromatography with DCM as eluent). **<sup>1</sup>H NMR** (300 MHz, CDCl<sub>3</sub>):  $\delta$  = 7.83–7.64 (m, 2H), 7.60–7.39 (m, 3H), 5.55–5.41 (m, 1H), 2.45 (s, 3H), 2.33 (s, 3H), 2.15–1.88 (m, 2H), 1.05 (t,  $J$  = 7.5 Hz, 3H). **<sup>13</sup>C NMR** (75 MHz, CDCl<sub>3</sub>)  $\delta$  = 198.2, 194.6, 156.9, 151.5, 131.6, 129.3, 122.8, 107.9, 30.6, 25.9, 25.3, 8.7. **FT-IR** (thin layer):  $\nu_{\text{max}}$  = 1726, 1691, 1363, 1301, 1022, 988, 950, 769, 691. **HR-MS** (ESI):  $m/z$  = 298.1152, calcd. for C<sub>14</sub>H<sub>17</sub>N<sub>3</sub>O<sub>3</sub>+Na<sup>+</sup>: 298.1162.

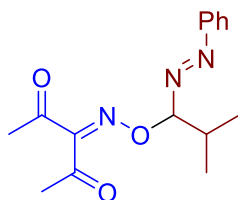

**(E)-3-((2-methyl-1-(phenyldiazenyl)propoxy)imino)pentane-2,4-dione, 3dc** was synthesized as yellow gum (68%, purified by column chromatography with DCM as eluent). **<sup>1</sup>H NMR** (300 MHz, DMSO-*d*<sub>6</sub>):  $\delta$  = 7.77–7.68 (m, 2H), 7.62–7.49 (m, 3H), 5.42 (d,  $J$  = 5.5 Hz, 1H), 2.40 (s, 3H), 2.39–2.28 (m, 1H), 2.26 (s, 3H), 0.99 (t,  $J$  = 7.5 Hz, 6H). **<sup>13</sup>C NMR** (75 MHz, DMSO-

$d_6$ ):  $\delta$  = 198.3, 193.7, 156.7, 150.9, 131.8, 129.4, 122.3, 109.1, 31.1, 30.0, 25.5, 17.5, 16.6. **FT-IR** (thin layer):  $\nu_{\max}$  = 2970, 1726, 1691, 1364, 1299, 1020, 998, 959, 769, 691. **HR-MS** (ESI):  $m/z$  = 290.1500, calcd. for  $C_{15}H_{19}N_3O_3+H^+$ : 290.1499.

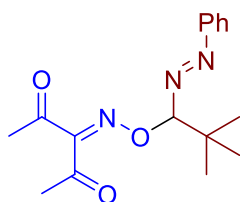

**(E)-3-((2,2-dimethyl-1-(phenyldiazenyl)propoxy)imino)pentane-2,4-dione, 3dd** was synthesized as pale yellow gum (21%, purified by column chromatography with DCM as eluent).  **$^1H$  NMR** (300 MHz,  $CDCl_3$ ):  $\delta$  = 7.80–7.69 (m, 2H), 7.53–7.44 (m, 3H), 5.27 (s, 1H), 2.44 (s, 3H), 2.29 (s, 3H), 1.08 (s, 9H).  **$^{13}C$  NMR** (75 MHz,  $CDCl_3$ ):  $\delta$  = 198.1, 194.5, 156.8, 151.6, 131.6, 129.3, 122.9, 112.1, 36.0, 30.4, 25.7. **FT-IR** (thin layer):  $\nu_{\max}$  = 2973, 1727, 1693, 1365, 1300, 1021, 999, 959. **HR-MS** (ESI):  $m/z$  = 326.1474, calcd. for  $C_{16}H_{21}N_3O_3+Na^+$ : 326.1475.

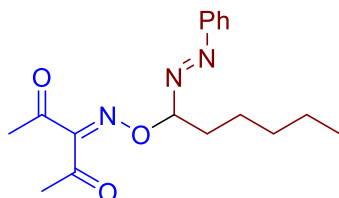

**(E)-3-(((1-(phenyldiazenyl)hexyl)oxy)imino)pentane-2,4-dione, 3de** was synthesized as yellow gum (70%, purified by column chromatography with DCM as eluent).  **$^1H$  NMR** (300 MHz,  $CDCl_3$ ):  $\delta$  = 7.80–7.67 (m, 2H), 7.55–7.42 (m, 3H), 5.55 (dd,  $J$  = 7.7, 5.1 Hz, 1H), 2.45 (s, 3H), 2.33 (s, 3H), 2.11–1.76 (m, 2H), 1.55–1.40 (m, 2H), 1.40–1.23 (m, 4H), 0.89 (t,  $J$  = 6.9 Hz, 3H).  **$^{13}C$  NMR** (75 MHz,  $CDCl_3$ ):  $\delta$  = 198.2, 194.6, 156.8, 151.5, 131.6, 129.2, 122.8, 107.0, 31.8, 31.6, 30.6, 25.9, 23.9, 22.5, 14.1. **FT-IR** (thin layer):  $\nu_{\max}$  = 2956, 2931, 1727, 1691, 1363, 1299, 964. **HR-MS** (ESI):  $m/z$  = 318.1810, calcd. for  $C_{17}H_{23}N_3O_3+H^+$ : 318.1812.

## X-ray single-crystal diffraction: Structure determination of compound 3ag

X-ray diffraction data were collected at 100K on a Bruker Quest D8 diffractometer equipped with a Photon-III area-detector (graphite monochromator, shutterless  $\varphi$ - and  $\omega$ -scan technique), using Mo  $K_\alpha$ -radiation (0.71073 Å). The intensity data were integrated by the SAINT program<sup>13</sup> and corrected for absorption and decay using SADABS.<sup>14</sup> The structure was solved by direct methods using SHELXT<sup>15</sup> and refined on  $F^2$  using SHELXL-2018.<sup>16</sup> All non-hydrogen atoms were refined with anisotropic displacement parameters. Hydrogen atoms were placed in ideal calculated positions and refined as riding atoms with relative isotropic displacement parameters. The SHELXTL program suite<sup>13</sup> was used for molecular graphics.

**Table S1.** Crystal data and structure refinement for **3ag**.

|                                    |                                                                        |                             |
|------------------------------------|------------------------------------------------------------------------|-----------------------------|
| Empirical formula                  | $C_{19}H_{18}BrN_3O_3$                                                 |                             |
| Formula weight                     | 416.27                                                                 |                             |
| Temperature                        | 100(2) K                                                               |                             |
| Wavelength                         | 0.71073 Å                                                              |                             |
| Crystal system                     | Triclinic                                                              |                             |
| Space group                        | P-1                                                                    |                             |
| Unit cell dimensions               | $a = 8.5693(3)$ Å                                                      | $\alpha = 77.8358(8)^\circ$ |
|                                    | $b = 8.6800(3)$ Å                                                      | $\beta = 81.1246(9)^\circ$  |
|                                    | $c = 13.7733(4)$ Å                                                     | $\gamma = 69.2122(8)^\circ$ |
| Volume                             | $932.73(5)$ Å <sup>3</sup>                                             |                             |
| Z                                  | 2                                                                      |                             |
| Density (calculated)               | 1.480 g/cm <sup>3</sup>                                                |                             |
| Absorption coefficient             | 2.227 mm <sup>-1</sup>                                                 |                             |
| F(000)                             | 424                                                                    |                             |
| Crystal size                       | 0.58 x 0.55 x 0.43 mm <sup>3</sup>                                     |                             |
| Theta range for data collection    | 2.546 to 37.807°.°                                                     |                             |
| Index ranges                       | -14 $\leq$ h $\leq$ 14, -14 $\leq$ k $\leq$ 14, -23 $\leq$ l $\leq$ 23 |                             |
| Reflections collected              | 57161                                                                  |                             |
| Independent reflections            | 9989 [R(int) = 0.0388]                                                 |                             |
| Observed reflections               | 8239                                                                   |                             |
| Completeness to theta<br>= 25.242° | 99.9 %                                                                 |                             |
| Absorption correction              | Semi-empirical from equivalents                                        |                             |
| Max. and min.<br>transmission      | 0.2763 and 0.1390                                                      |                             |
| Refinement method                  | Full-matrix least-squares on F <sup>2</sup>                            |                             |
| Data / restraints /<br>parameters  | 9989 / 0 / 239                                                         |                             |
| Goodness-of-fit on F <sup>2</sup>  | 1.026                                                                  |                             |
| Final R indices<br>[I>2sigma(I)]   | R1 = 0.0322, wR2 = 0.0812                                              |                             |
| R indices (all data)               | R1 = 0.0439, wR2 = 0.0861                                              |                             |
| Largest diff. peak and<br>hole     | 1.168 and -1.302 e.Å <sup>-3</sup>                                     |                             |

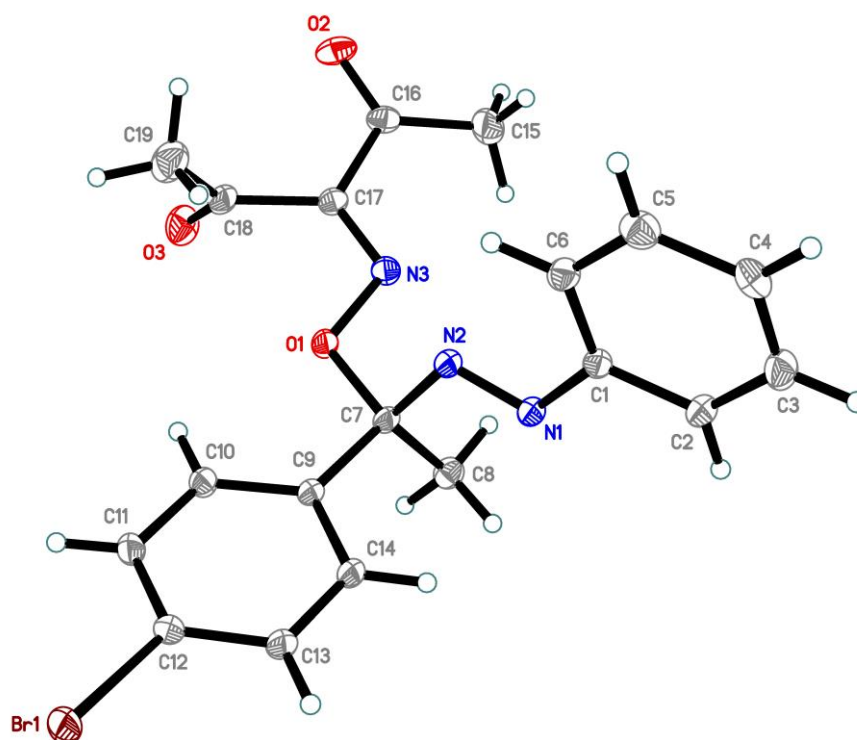

**Figure S1.** Crystal structure of compound **3ag**, showing the atomic numbering and 50% probability displacement ellipsoids

Compound **3ag** crystallizes in monoclinic space group P-1 (Fig. S1).

## Computational details

DFT calculations were conducted by B97-3c composite method<sup>17</sup> including D3 dispersion correction<sup>18,19</sup> as implemented in Orca 5.0.4 program<sup>20</sup>. Main conformers of diacetyliminoxyl **1** and hydrazone **2ca** were considered in all calculations. Presented results correspond to 218.15 K and 1 atm. Cartesian coordinates and energy values of optimized structures of **1a**, **1**, **2ca**, **A**, **B**, and transition states for path I and path II are given below. Optimized geometries were visualized by Avogadro 1.2 program.<sup>21</sup>

### Diacetyl oxime 1(a)

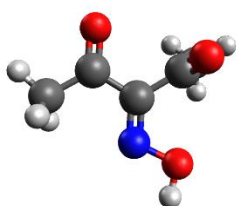

Unpaired electrons: 0

Imaginary frequencies: no

|                         |                   |                                     |
|-------------------------|-------------------|-------------------------------------|
| Final Gibbs free energy | ...               | -474.83198681 Eh                    |
| Total Enthalpy          | ...               | -474.78529015 Eh                    |
| Electronic energy       | ...               | -474.91396710 Eh                    |
| N                       | 0.06970225033778  | 1.54562566196768 0.00854359883869   |
| C                       | 0.08841033853849  | 0.26382198676505 0.07371521376140   |
| C                       | -1.15107648533480 | -0.59782234957868 0.22487853008821  |
| C                       | 1.40196017603439  | -0.42333735426638 0.03322902618181  |
| O                       | -1.54265829649431 | -0.86755404828874 1.34410855371014  |
| O                       | 1.40954528713797  | -1.64891879358009 0.06475775394007  |
| O                       | -1.20870418302714 | 2.06009556558835 0.04595806704607   |
| H                       | -1.07082430823139 | 3.01644889783864 -0.01859299086395  |
| C                       | -1.79598390678403 | -1.05316711770259 -1.03488608550523 |
| H                       | -2.69013432158179 | -1.63226785517786 -0.82657438779557 |
| H                       | -2.03918075734542 | -0.19077263723676 -1.65639698571686 |
| H                       | -1.08467615232901 | -1.65537516851252 -1.60210325386446 |
| C                       | 2.64933690106215  | 0.39673910326443 -0.03599672505283  |
| H                       | 2.61027263562725  | 1.09594619155812 -0.86862938540732  |
| H                       | 2.75198013657635  | 0.99236558635661 0.87075641067229   |
| H                       | 3.50731168581351  | -0.25923066899526 -0.13816534003246 |

### Diacetyliminoxyl radical (1)

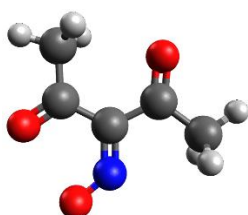

Unpaired electrons: 1

Imaginary frequencies: no

|                         |                   |                                     |
|-------------------------|-------------------|-------------------------------------|
| Final Gibbs free energy | ...               | -474.22068873 Eh                    |
| Total Enthalpy          | ...               | -474.17480563 Eh                    |
| Electronic energy       | ...               | -474.29128868 Eh                    |
| C                       | -1.33538414773864 | -1.96184929957175 -0.00010017151065 |
| C                       | -1.27946371058432 | -0.46700782514113 -0.00040563769729 |
| H                       | -2.37450916379125 | -2.27239775783076 0.00049472164576  |



|   |                   |                   |                   |
|---|-------------------|-------------------|-------------------|
| H | -0.81859334007738 | -2.35823706627575 | -0.87070509570917 |
| H | -0.81768566092729 | -2.35795354049976 | 0.87010043278926  |
| C | 0.04990145680954  | 0.22072226254471  | -0.00041456707655 |
| C | 1.38326434561685  | -0.42221970562381 | -0.00060624263912 |
| C | 2.58086993574630  | 0.48363325680431  | 0.00010539993198  |
| H | 2.57346739547275  | 1.13127684194830  | -0.87556596752056 |
| H | 3.48231145114325  | -0.11952463580711 | 0.00046637524965  |
| H | 2.57262527054406  | 1.13105670448193  | 0.87593869695890  |
| N | 0.03632679688412  | 1.52809581527337  | -0.00024512776745 |
| O | -0.89676757675779 | 2.30058401146669  | -0.00011685457034 |
| O | -2.29609797732566 | 0.20998647163861  | 0.00059004640418  |
| O | 1.49821192498545  | -1.64031853340783 | -0.00010100848861 |

### 1-phenyl-2-(propan-2-ylidene)hydrazine (hydrazone 2ca)

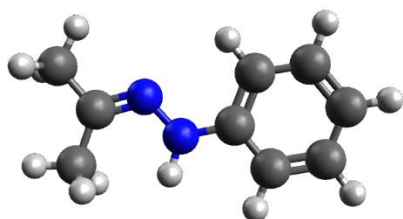

Unpaired electrons: 0

Imaginary frequencies: no

Final Gibbs free energy ... -459.29164258 Eh

Total Enthalpy ... -459.24325792 Eh

Electronic energy ... -459.44600868 Eh

|   |                   |                   |                   |
|---|-------------------|-------------------|-------------------|
| C | -2.68828473691068 | -0.10798480311287 | 0.02771241309834  |
| C | -3.15896750595697 | 1.31340080568908  | 0.00973857270202  |
| H | -2.80479835013175 | 1.83964560149747  | -0.87979305768191 |
| H | -4.24298035489196 | 1.36556371948182  | 0.01771621721063  |
| H | -2.79269322723717 | 1.86764647378725  | 0.87737274418745  |
| C | 0.84341944945057  | 0.20126289738187  | 0.00059373435521  |
| C | 1.76992448646290  | 1.25330467736635  | 0.01876207241468  |
| C | 1.31610657137754  | -1.11631705582259 | 0.00025776409773  |
| C | 3.12821220921590  | 0.98988995939636  | 0.03525792802819  |
| H | 1.41403427492504  | 2.27641467402569  | 0.02005453646898  |

|   |                   |                   |                   |
|---|-------------------|-------------------|-------------------|
| C | 2.68041616682092  | -1.36154042942581 | 0.01746875855271  |
| H | 0.61200986279974  | -1.93365766507553 | -0.01265148788478 |
| C | 3.59952948891468  | -0.31905815019590 | 0.03475568779620  |
| H | 3.82503601980865  | 1.81786918352351  | 0.04967967676972  |
| H | 3.02738675709240  | -2.38696238873642 | 0.01716708495444  |
| H | 4.66172093115328  | -0.52102194782030 | 0.04805596986220  |
| N | -1.44831891686306 | -0.45898915543771 | 0.01231611269370  |
| N | -0.50225727949582 | 0.50549952080282  | -0.02496421741167 |
| H | -0.76299821766264 | 1.48070371931762  | 0.01709855475445  |
| C | -3.70944952532095 | -1.19255080486344 | 0.06475426018305  |
| H | -4.34260629361971 | -1.09932941111583 | 0.94978551909342  |
| H | -4.37462058201747 | -1.12940871641359 | -0.79929750923365 |
| H | -3.23994122791342 | -2.17221270424985 | 0.07306866498886  |

### Hydrazyl radical (A)

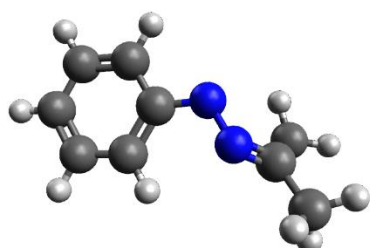

Unpaired electrons: 1

Imaginary frequencies: no

Final Gibbs free energy ... -458.67006756 Eh

Total Enthalpy ... -458.62140860 Eh

Electronic energy ... -458.81114779 Eh

|   |                   |                   |                  |
|---|-------------------|-------------------|------------------|
| C | -1.72338616027636 | 2.71428469319100  | 0.22077940605414 |
| C | -0.72622767139289 | 2.50766868189767  | 1.31216198697860 |
| H | 0.18104509298792  | 3.07704571522331  | 1.12605366397245 |
| H | -1.13648232724174 | 2.84718908902932  | 2.26504759995647 |
| H | -0.48897000170441 | 1.45108853103101  | 1.41968230462667 |
| C | -3.75822670237235 | 0.18554628823212  | 1.02464620133219 |
| C | -3.79792950046681 | -1.16724211828324 | 1.42769582834566 |
| C | -4.87414530822482 | 1.00703747685982  | 1.30363120159041 |

|   |                   |                   |                   |
|---|-------------------|-------------------|-------------------|
| C | -4.89900688259140 | -1.67020028425693 | 2.08858582276639  |
| H | -2.94322464269852 | -1.79360779123958 | 1.21106621686552  |
| C | -5.96986247227073 | 0.48672231167988  | 1.96151612192368  |
| H | -4.85948632092238 | 2.04162015133829  | 0.99353684068354  |
| C | -5.99314213313639 | -0.84951975888042 | 2.35983027948697  |
| H | -4.91333287945769 | -2.70781209614253 | 2.39425892196645  |
| H | -6.82025745869417 | 1.12327433347172  | 2.16831933408262  |
| H | -6.85684141493623 | -1.24730204289183 | 2.87473683366425  |
| N | -2.62294760358929 | 1.84380547466124  | -0.07175586597223 |
| N | -2.61585690500284 | 0.60863336080034  | 0.40834074110731  |
| C | -1.70251713840699 | 3.99535279174785  | -0.53550333929676 |
| H | -1.78744327673710 | 4.84304979731567  | 0.14613016940992  |
| H | -0.74953087045499 | 4.11028041889706  | -1.05539058684360 |
| H | -2.50974399140980 | 4.04016445531821  | -1.26042722870066 |

#### Diacetylliminoxyl radical 1 adduct to hydrazone 2ca (B)

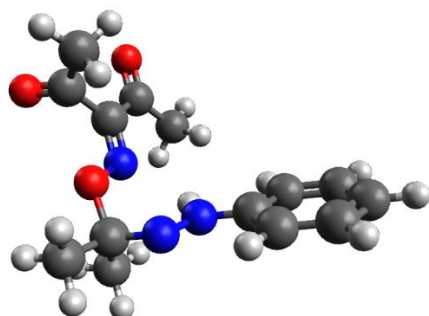

Unpaired electrons: 1

Imaginary frequencies: no

Final Gibbs free energy ... -933.48547166 Eh

Total Enthalpy ... -933.41400148 Eh

Electronic energy ... -933.73578724 Eh

|   |                   |                   |                   |
|---|-------------------|-------------------|-------------------|
| C | 0.20208540057188  | 2.66697044318437  | -1.44286809710738 |
| H | -0.55294441937583 | 3.44936971465738  | -1.44903454981695 |
| H | 1.13073696934283  | 3.07566803474246  | -1.83307730219112 |
| H | -0.12727525428895 | 1.87073852170414  | -2.10292020364739 |
| C | -2.45537056683475 | 0.00740354934420  | 0.38428907799657  |
| C | -2.92719595691344 | -1.08197545518958 | -0.35908881243144 |

|   |                   |                   |                   |
|---|-------------------|-------------------|-------------------|
| C | -3.14486128634428 | 0.41848900361807  | 1.53092881806197  |
| C | -4.07128530401349 | -1.74646687842773 | 0.04126119929755  |
| H | -2.39309940117444 | -1.39777631928556 | -1.24581304649687 |
| C | -4.28810438693986 | -0.25959205196204 | 1.91642942925229  |
| H | -2.77707133953158 | 1.25682765826169  | 2.10156177027238  |
| C | -4.76099670377059 | -1.34175827100304 | 1.18068594930122  |
| H | -4.42721214666704 | -2.58696353356826 | -0.53898653117118 |
| H | -4.81722357579462 | 0.06212412304624  | 2.80355867195593  |
| H | -5.65533379714678 | -1.86379029194511 | 1.49135821454483  |
| N | -0.76376536018175 | 1.65658128708482  | 0.61878690122883  |
| N | -1.31633689450645 | 0.65677545700822  | -0.05201259323035 |
| H | -0.83362752640751 | 0.25687190408940  | -0.85244504024837 |
| C | 0.93388726634611  | 3.30464593773993  | 0.87419986002085  |
| H | 1.85760273274683  | 3.70950263374563  | 0.46981695888761  |
| H | 0.19756121201662  | 4.10191674506906  | 0.92944978109626  |
| H | 1.11444343105022  | 2.93045485208165  | 1.87884128955564  |
| C | 0.40533129577487  | 2.20034105891560  | -0.01224958859179 |
| O | 1.52979315458969  | 1.19513271083804  | 0.03121839293010  |
| N | 1.32899146152188  | 0.15593448636255  | -0.82560201624782 |
| C | 2.21033664143136  | -0.77547762341932 | -0.70491952953750 |
| C | 3.37523484582571  | -0.69832815114747 | 0.26062970332883  |
| C | 2.08813309077490  | -1.97170540927001 | -1.55975140115902 |
| C | 3.13011641122726  | -1.23771914571563 | 1.62487801780537  |
| O | 4.42594263980457  | -0.21449578250983 | -0.11632447000970 |
| C | 0.94892045439329  | -2.05372011365357 | -2.52685141339844 |
| O | 2.92280986455075  | -2.86453552613147 | -1.43722592606142 |
| H | 4.00023323554734  | -1.10216977055046 | 2.25958505161548  |
| H | 2.26049408539129  | -0.74627864659645 | 2.06245002308525  |
| H | 2.88449978798086  | -2.29812335426272 | 1.54876371048518  |
| H | -0.00164151365853 | -2.00535008457258 | -1.99772413117195 |
| H | 1.01205019185409  | -2.98474881101989 | -3.08011804610397 |
| H | 0.96922878080754  | -1.21118930126280 | -3.21599308209943 |

**Transition state for hydrogen atom abstraction from hydrazone 2ca by diacetyliminoxyl radical 1 (Path I)**

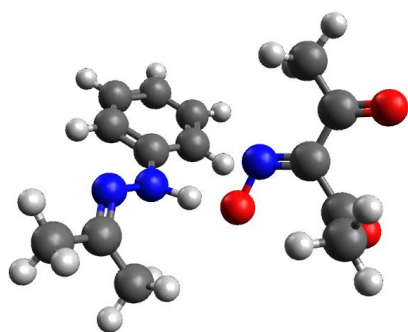

Unpaired electrons: 1

Imaginary frequencies: 1

Final Gibbs free energy ... -933.49075506 Eh

Total Enthalpy ... -933.41654700 Eh

Electronic energy ... -933.73278728 Eh

|   |                   |                   |                   |
|---|-------------------|-------------------|-------------------|
| C | -2.67860679090951 | -1.89648384316536 | 0.54948187300355  |
| C | -2.21349691934370 | -2.69406541384970 | -0.61630877431048 |
| H | -1.23401112093057 | -3.12099090918240 | -0.39076607843662 |
| H | -2.88926453235783 | -3.52519973779008 | -0.79976550850007 |
| H | -2.11596148367138 | -2.09540955521574 | -1.51662080451967 |
| C | -1.84233979986778 | 1.35247254848249  | -0.36616905182471 |
| C | -0.89416093642782 | 1.99661365797425  | -1.19094765247673 |
| C | -2.89161455605118 | 2.09852871890858  | 0.20894655011364  |
| C | -0.99581000643264 | 3.35085267846665  | -1.42110394078054 |
| H | -0.09703893464611 | 1.41927658179076  | -1.63372013123499 |
| C | -2.97551135014645 | 3.44992975529813  | -0.03783327808182 |
| H | -3.61056883023651 | 1.60290197412827  | 0.84180799133073  |
| C | -2.03279527196658 | 4.08532682673897  | -0.84930885363436 |
| H | -0.26700398066986 | 3.84213868113130  | -2.05000461453565 |
| H | -3.77753397875648 | 4.02412622600595  | 0.40463997080790  |
| H | -2.10784219008135 | 5.14799821418774  | -1.03246808129819 |
| N | -2.51251558185589 | -0.61514819621273 | 0.69330444415441  |
| N | -1.71422625673441 | 0.00685602376814  | -0.19308017247196 |
| C | -3.39967819943933 | -2.60226185348514 | 1.63482633175767  |
| H | -4.32654122283430 | -3.03016502277996 | 1.24882676727505  |

|   |                   |                   |                   |
|---|-------------------|-------------------|-------------------|
| H | -2.80094284232157 | -3.44251639167538 | 1.98972906711072  |
| H | -3.62541066195303 | -1.94055397903985 | 2.46422746017884  |
| O | 0.58855737635927  | -0.98181742929971 | -0.52099404878882 |
| N | 1.36916130546165  | -0.12792640383936 | 0.10693363272955  |
| C | 2.64715001430066  | -0.38134769325150 | 0.08139044962258  |
| C | 3.20450362011337  | -1.58447810306832 | -0.64066550444963 |
| C | 3.56497584941896  | 0.51627341661213  | 0.76573881338546  |
| C | 3.25688354888892  | -2.85107057610939 | 0.14497393136953  |
| O | 3.57379235165927  | -1.49027918813163 | -1.79889123430014 |
| C | 3.01965548097088  | 1.74449013515227  | 1.43872539190041  |
| O | 4.77311854177684  | 0.25397068444044  | 0.77841290055731  |
| H | 3.61323038951389  | -3.67809719678589 | -0.46202061043530 |
| H | 3.91563355439710  | -2.70764394248505 | 1.00296149827240  |
| H | 2.26648439203522  | -3.07242523129194 | 0.54353793737449  |
| H | 2.55714061488931  | 2.40509338235350  | 0.70664188127719  |
| H | 3.82883878371615  | 2.26756818221565  | 1.93872860745157  |
| H | 2.24721958844201  | 1.48357761405276  | 2.15911789502286  |
| H | -0.70115596430925 | -0.46753663504886 | -0.42493705461618 |

**Transition state for diacetyliminoxyl radical 1 addition to hydrazone 2ca (Path II)**

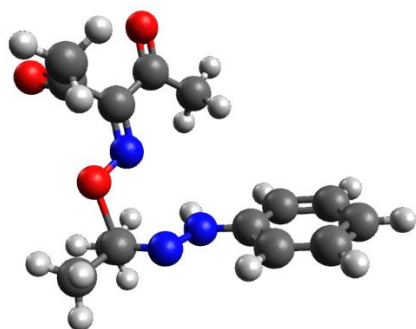

Unpaired electrons: 1

Imaginary frequencies: 1

Final Gibbs free energy ... -933.48201377 Eh

Total Enthalpy ... -933.41053113 Eh

Electronic energy ... -933.73092950 Eh

|   |                  |                  |                   |
|---|------------------|------------------|-------------------|
| C | 0.27503802918850 | 2.72875138211409 | -1.44429719853980 |
|---|------------------|------------------|-------------------|

|   |                   |                   |                   |
|---|-------------------|-------------------|-------------------|
| H | -0.57098327533227 | 3.37744680671123  | -1.67204226740085 |
| H | 1.19138511223518  | 3.26243018180790  | -1.67430515241035 |
| H | 0.22494528516479  | 1.86199991786022  | -2.09922380573659 |
| C | -2.54166763596767 | 0.12409290859729  | 0.14934655162066  |
| C | -3.12931993714930 | -0.73935017695603 | -0.78484566037081 |
| C | -3.05023429246225 | 0.19890325120213  | 1.45129888264606  |
| C | -4.21048184080145 | -1.51659297855103 | -0.41644411877056 |
| H | -2.73069905575516 | -0.79247828402190 | -1.78963826149161 |
| C | -4.13408693506004 | -0.58581782014549 | 1.80032681981692  |
| H | -2.59115625534702 | 0.86303510570720  | 2.16640291152016  |
| C | -4.72103089405013 | -1.44584835997663 | 0.87645096392150  |
| H | -4.65806166975304 | -2.18193994437398 | -1.14184954057883 |
| H | -4.52559299716710 | -0.52741319242802 | 2.80689424994056  |
| H | -5.56732957675994 | -2.05526102704758 | 1.16116868753842  |
| N | -0.82406713412918 | 1.70951837542265  | 0.55579014107598  |
| N | -1.46482702690720 | 0.88421082737468  | -0.25713626351273 |
| H | -1.11904272292404 | 0.72038374995890  | -1.19574966621820 |
| C | 0.78132822972775  | 3.41551701216008  | 0.94455218615434  |
| H | 1.80070114046036  | 3.67702608800313  | 0.67433045712908  |
| H | 0.17182637684762  | 4.31589598019298  | 0.86732565355112  |
| H | 0.75461075718273  | 3.06825439477512  | 1.97324515170304  |
| C | 0.24090071758986  | 2.37393643751057  | 0.01637416488474  |

|   |                   |                   |                   |
|---|-------------------|-------------------|-------------------|
| O | 1.63957837305631  | 1.20190322979606  | 0.10492115377978  |
| N | 1.31501003832916  | 0.11026236533061  | -0.54777222875358 |
| C | 2.19218147934141  | -0.84525150624459 | -0.55280665570219 |
| C | 3.54097590086083  | -0.71526891607733 | 0.11831695631920  |
| C | 1.85935501177464  | -2.09713378089655 | -1.23225224973420 |
| C | 3.59664646490207  | -1.10785944849598 | 1.55393815715428  |
| O | 4.49420838576509  | -0.29789094283756 | -0.51517947115887 |
| C | 0.51248646164902  | -2.23678876185190 | -1.87882440969830 |
| O | 2.68479419848239  | -3.01233865993344 | -1.23355081930947 |
| H | 4.58707516542079  | -0.94498289679690 | 1.96776319468071  |
| H | 2.85418295042570  | -0.53864429842055 | 2.11469010569789  |
| H | 3.31979105937952  | -2.15901845532337 | 1.64789049440119  |
| H | -0.26642593815953 | -2.23632565090172 | -1.11701009461966 |
| H | 0.47370575181046  | -3.17054428653096 | -2.43037770976349 |
| H | 0.30338499413126  | -1.40136221871340 | -2.54291145376550 |

## References

- (1) Andleeb, H.; Tehseen, Y.; Ali Shah, S. J.; Khan, I.; Iqbal, J.; Hameed, S. Identification of Novel Pyrazole–Rhodanine Hybrid Scaffolds as Potent Inhibitors of Aldose Reductase: Design, Synthesis, Biological Evaluation and Molecular Docking Analysis. *RSC Adv.* **2016**, 6 (81), 77688–77700. <https://doi.org/10.1039/C6RA14531K>.
- (2) Chen, Z.; Li, H.; Dong, W.; Miao, M.; Ren, H. I<sub>2</sub>-Catalyzed Oxidative Coupling Reactions of Hydrazones and Amines and the Application in the Synthesis of 1,3,5-Trisubstituted 1,2,4-Triazoles. *Org. Lett.* **2016**, 18 (6), 1334–1337. <https://doi.org/10.1021/acs.orglett.6b00277>.
- (3) Harej, M.; Dolenc, D. Autoxidation of Hydrazones. Some New Insights. *J. Org. Chem.* **2007**, 72 (19), 7214–7221. <https://doi.org/10.1021/jo071091m>.
- (4) Qian, H.; Nguyen, H. D.; Lv, L.; Chen, S.; Li, Z. Chemo-, Stereo- and Regioselective Fluoroallylation/Annulation of Hydrazones with Gem -Difluorocyclopropanes via Tunable Palladium/NHC Catalysis. *Angew Chem Int Ed* **2023**, 62 (23), e202303271. <https://doi.org/10.1002/anie.202303271>.



- (5) Su, Y.-M.; Hou, Y.; Yin, F.; Xu, Y.-M.; Li, Y.; Zheng, X.; Wang, X.-S. Visible Light-Mediated C–H Difluoromethylation of Electron-Rich Heteroarenes. *Org. Lett.* **2014**, *16* (11), 2958–2961. <https://doi.org/10.1021/ol501094z>.
- (6) Yang, X.-L.; Peng, X.-X.; Chen, F.; Han, B. TEMPO-Mediated Aza-Diels–Alder Reaction: Synthesis of Tetrahydropyridazines Using Ketohydrazones and Olefins. *Org. Lett.* **2016**, *18* (9), 2070–2073. <https://doi.org/10.1021/acs.orglett.6b00702>.
- (7) Zhang, G.; Miao, J.; Zhao, Y.; Ge, H. Copper-Catalyzed Aerobic Dehydrogenative Cyclization of N-Methyl-N-Phenylhydrazones: Synthesis of Cinnolines. *Angew. Chem. Int. Ed.* **2012**, *51* (33), 8318–8321. <https://doi.org/10.1002/anie.201204339>.
- (8) Kašpar, M.; Hamplová, V.; Novotná, V.; Pacherová, O. The Effect of the Alkyl Chain Length on the Mesomorphic Properties of New Lactic Acid Derivatives. *Liquid Crystals* **2014**, *41* (8), 1179–1187. <https://doi.org/10.1080/02678292.2014.910315>.
- (9) Katagiri, T.; Ota, S.; Ohira, T.; Yamao, T.; Hotta, S. Synthesis of Thiophene/Phenylene Co-Oligomers. V. Functionalization at Molecular Terminals toward Optoelectronic Device Applications. *Journal of Heterocyclic Chemistry* **2007**, *44* (4), 853–862. <https://doi.org/10.1002/jhet.5570440417>.
- (10) Trofimov, B. A.; Schmidt, E. Yu.; Zorina, N. V.; Ivanova, E. V.; Ushakov, I. A. Transition-Metal-Free Superbase-Promoted Stereoselective  $\alpha$ -Vinylolation of Ketones with Arylacetylenes: A General Strategy for Synthesis of  $\beta,\gamma$ -Unsaturated Ketones. *J. Org. Chem.* **2012**, *77* (16), 6880–6886. <https://doi.org/10.1021/jo301005p>.
- (11) Pünner, F.; Sohtome, Y.; Sodeoka, M. Solvent-Dependent Copper-Catalyzed Synthesis of Pyrazoles under Aerobic Conditions. *Chem. Commun.* **2016**, *52* (98), 14093–14096. <https://doi.org/10.1039/C6CC06935E>.
- (12) Krylov, I. B.; Paveliev, S. A.; Shelimov, B. N.; Lokshin, B. V.; Garbuzova, I. A.; Tafeenko, V. A.; Chernyshev, V. V.; Budnikov, A. S.; Nikishin, G. I.; Terent'ev, A. O. Selective Cross-Dehydrogenative C–O Coupling of N-Hydroxy Compounds with Pyrazolones. Introduction of the Diacetylminoxyl Radical into the Practice of Organic Synthesis. *Org. Chem. Front.* **2017**, *4* (10), 1947–1957. <https://doi.org/10.1039/C7QO00447H>.
- (13) Bruker. APEX-III. Bruker AXS Inc., Madison, Wisconsin, USA, 2019.
- (14) Krause, L.; Herbst-Irmer, R.; Sheldrick, G. M.; Stalke, D. Comparison of Silver and Molybdenum Microfocus X-Ray Sources for Single-Crystal Structure Determination. *J Appl Crystallogr* **2015**, *48* (1), 3–10. <https://doi.org/10.1107/S1600576714022985>.
- (15) Sheldrick, G. M. SHELXT – Integrated Space-Group and Crystal-Structure Determination. *Acta Crystallogr A Found Adv* **2015**, *71* (1), 3–8. <https://doi.org/10.1107/S2053273314026370>.
- (16) Sheldrick, G. M. Crystal Structure Refinement with SHELXL. *Acta Crystallogr C Struct Chem* **2015**, *71* (1), 3–8. <https://doi.org/10.1107/S2053229614024218>.
- (17) Brandenburg, J. G.; Bannwarth, C.; Hansen, A.; Grimme, S. B97-3c: A Revised Low-Cost Variant of the B97-D Density Functional Method. *The Journal of Chemical Physics* **2018**, *148* (6), 064104. <https://doi.org/10.1063/1.5012601>.
- (18) Grimme, S.; Ehrlich, S.; Goerigk, L. Effect of the Damping Function in Dispersion Corrected Density Functional Theory. *J Comput Chem* **2011**, *32* (7), 1456–1465. <https://doi.org/10.1002/jcc.21759>.
- (19) Grimme, S.; Antony, J.; Ehrlich, S.; Krieg, H. A Consistent and Accurate *Ab Initio* Parametrization of Density Functional Dispersion Correction (DFT-D) for the 94 Elements H–Pu. *The Journal of Chemical Physics* **2010**, *132* (15), 154104. <https://doi.org/10.1063/1.3382344>.
- (20) Neese, F. Software Update: The ORCA Program System—Version 5.0. *WIREs Comput Mol Sci* **2022**, *12* (5), e1606. <https://doi.org/10.1002/wcms.1606>.
- (21) Hanwell, M. D.; Curtis, D. E.; Lonie, D. C.; Vandermeersch, T.; Zurek, E.; Hutchison, G. R. Avogadro: An Advanced Semantic Chemical Editor, Visualization, and Analysis Platform. *J Cheminform* **2012**, *4* (1), 17. <https://doi.org/10.1186/1758-2946-4-17>.

## **The $^1\text{H}$ and $^{13}\text{C}$ spectra of synthesized compounds**

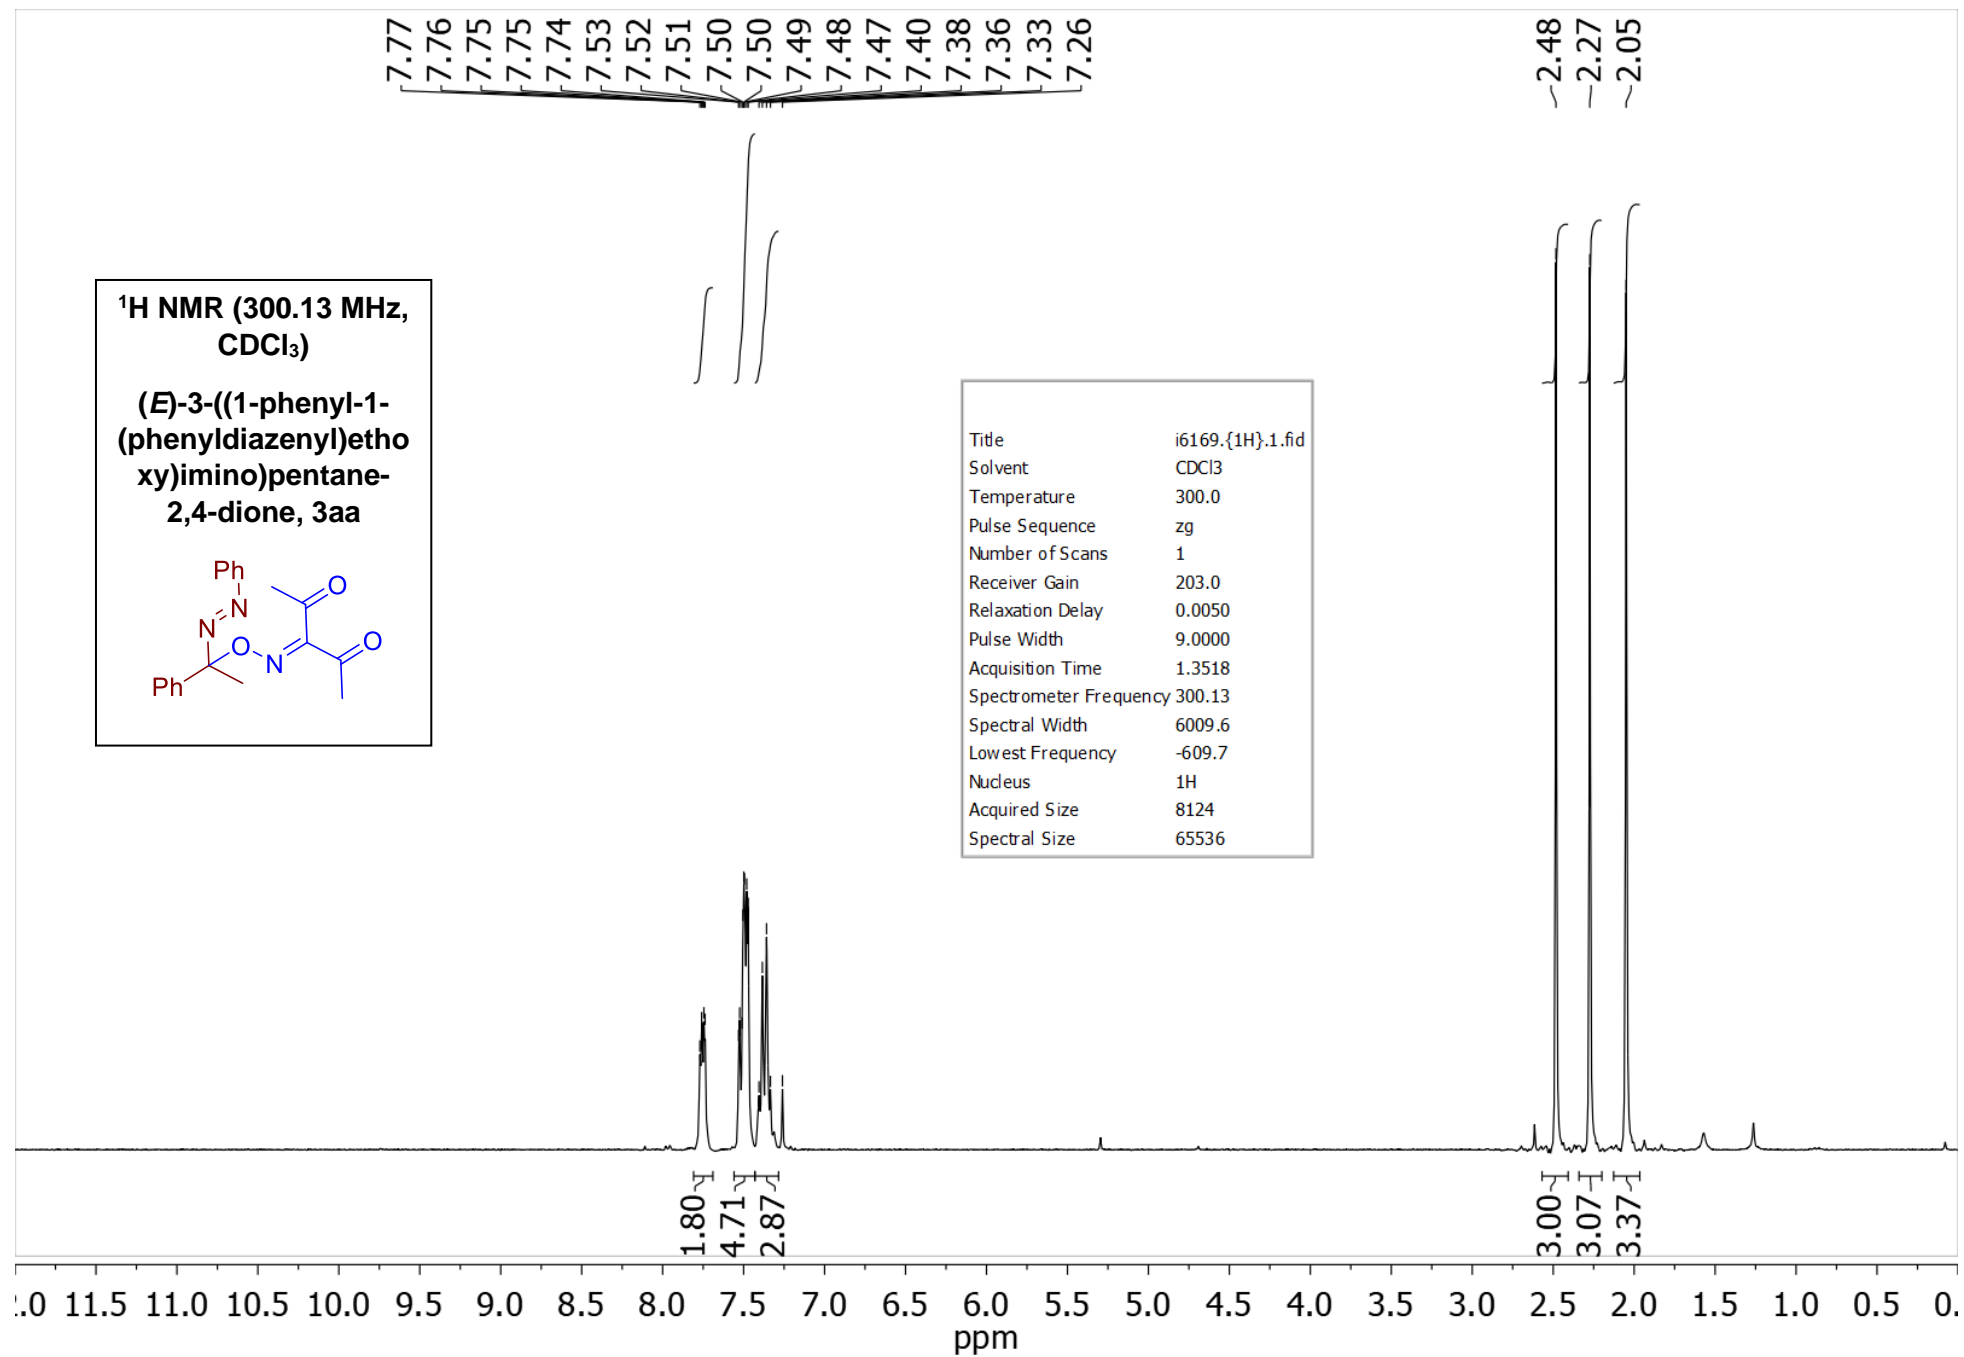

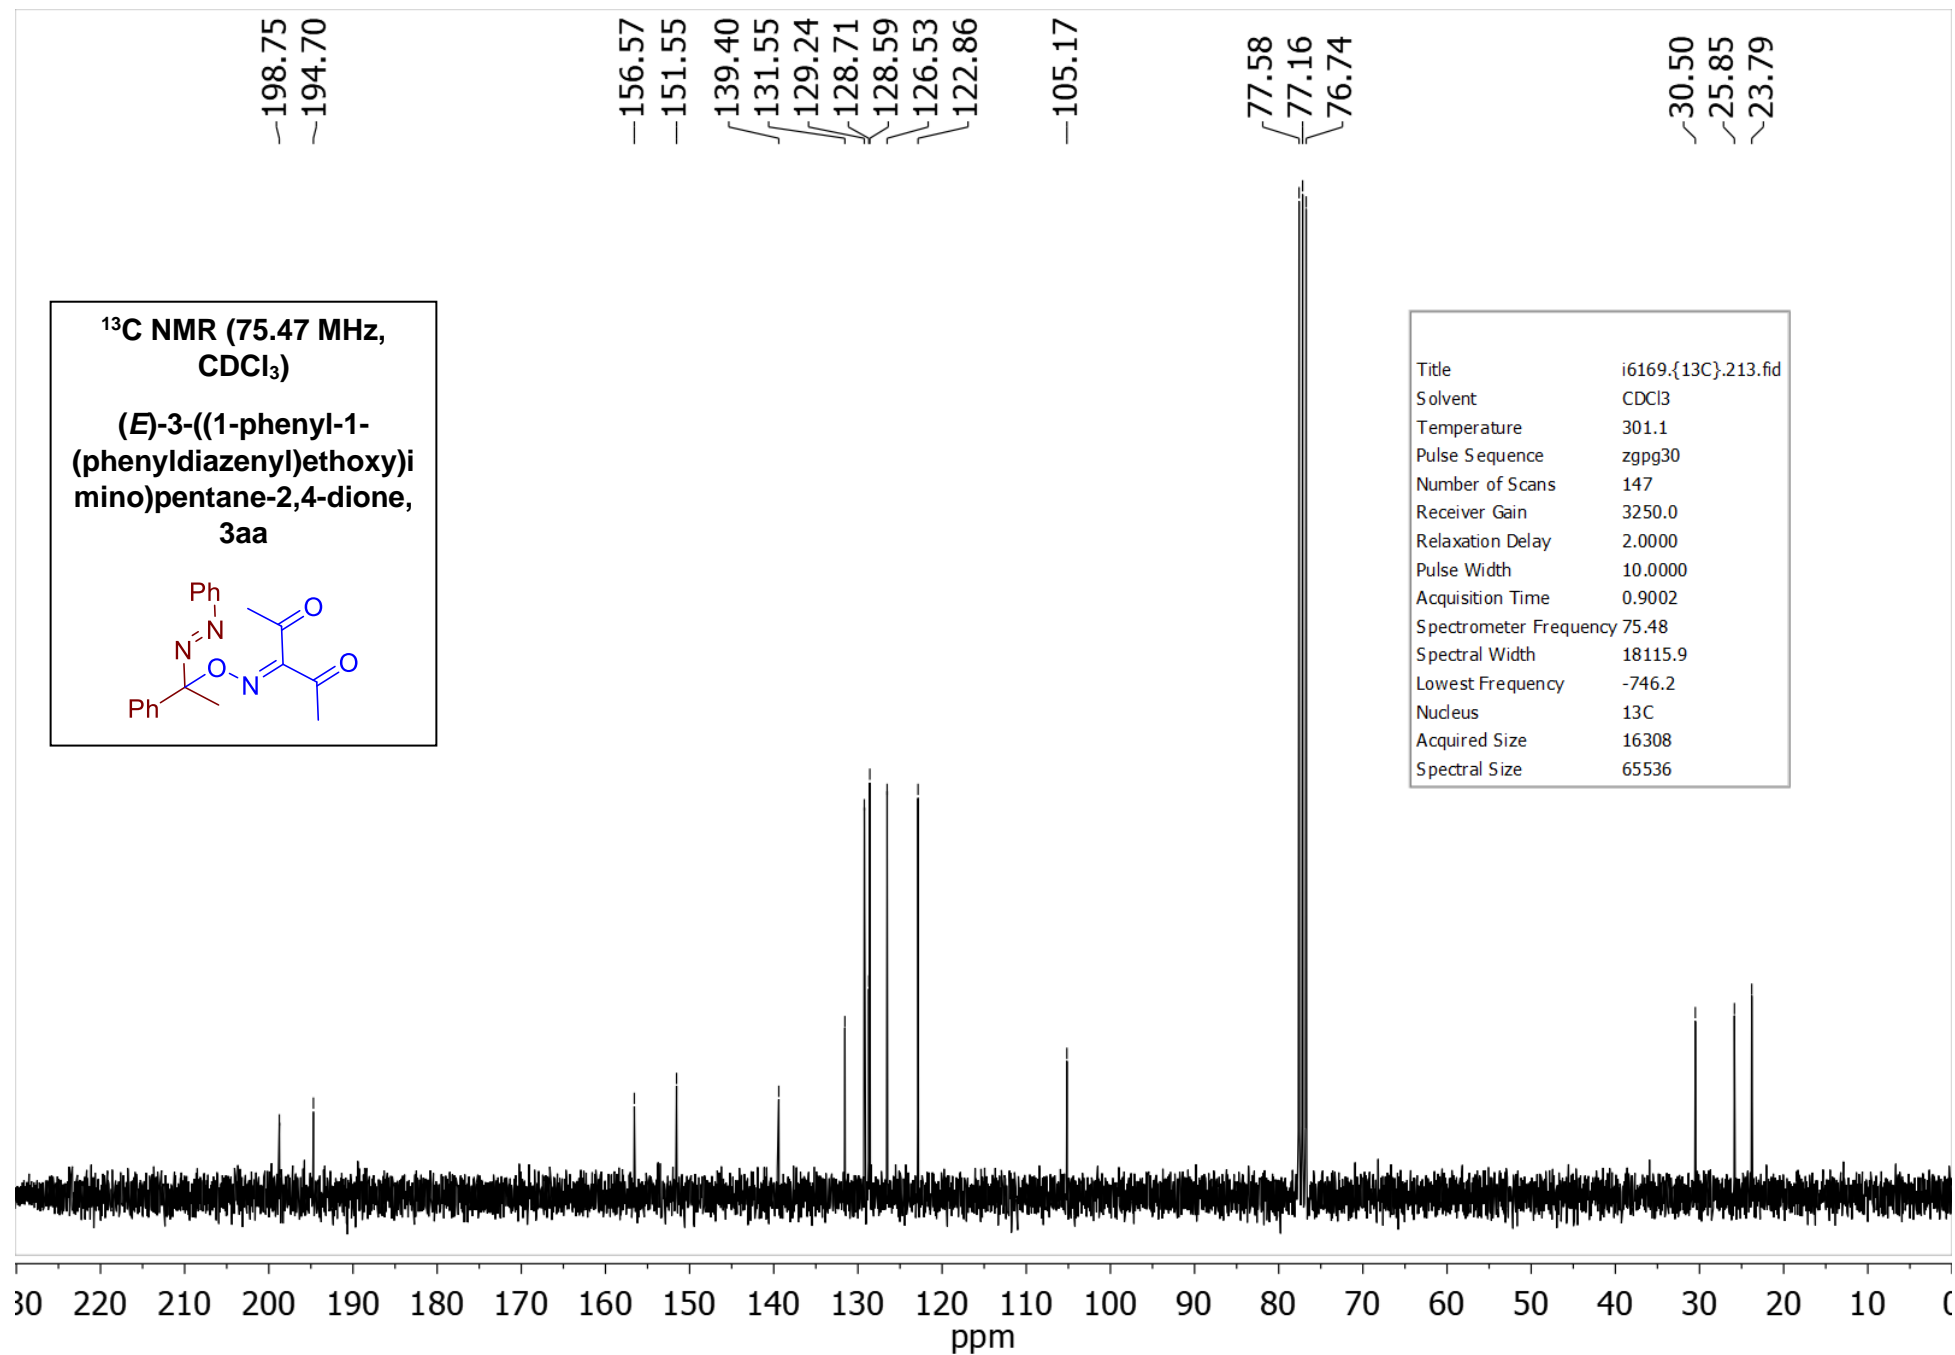

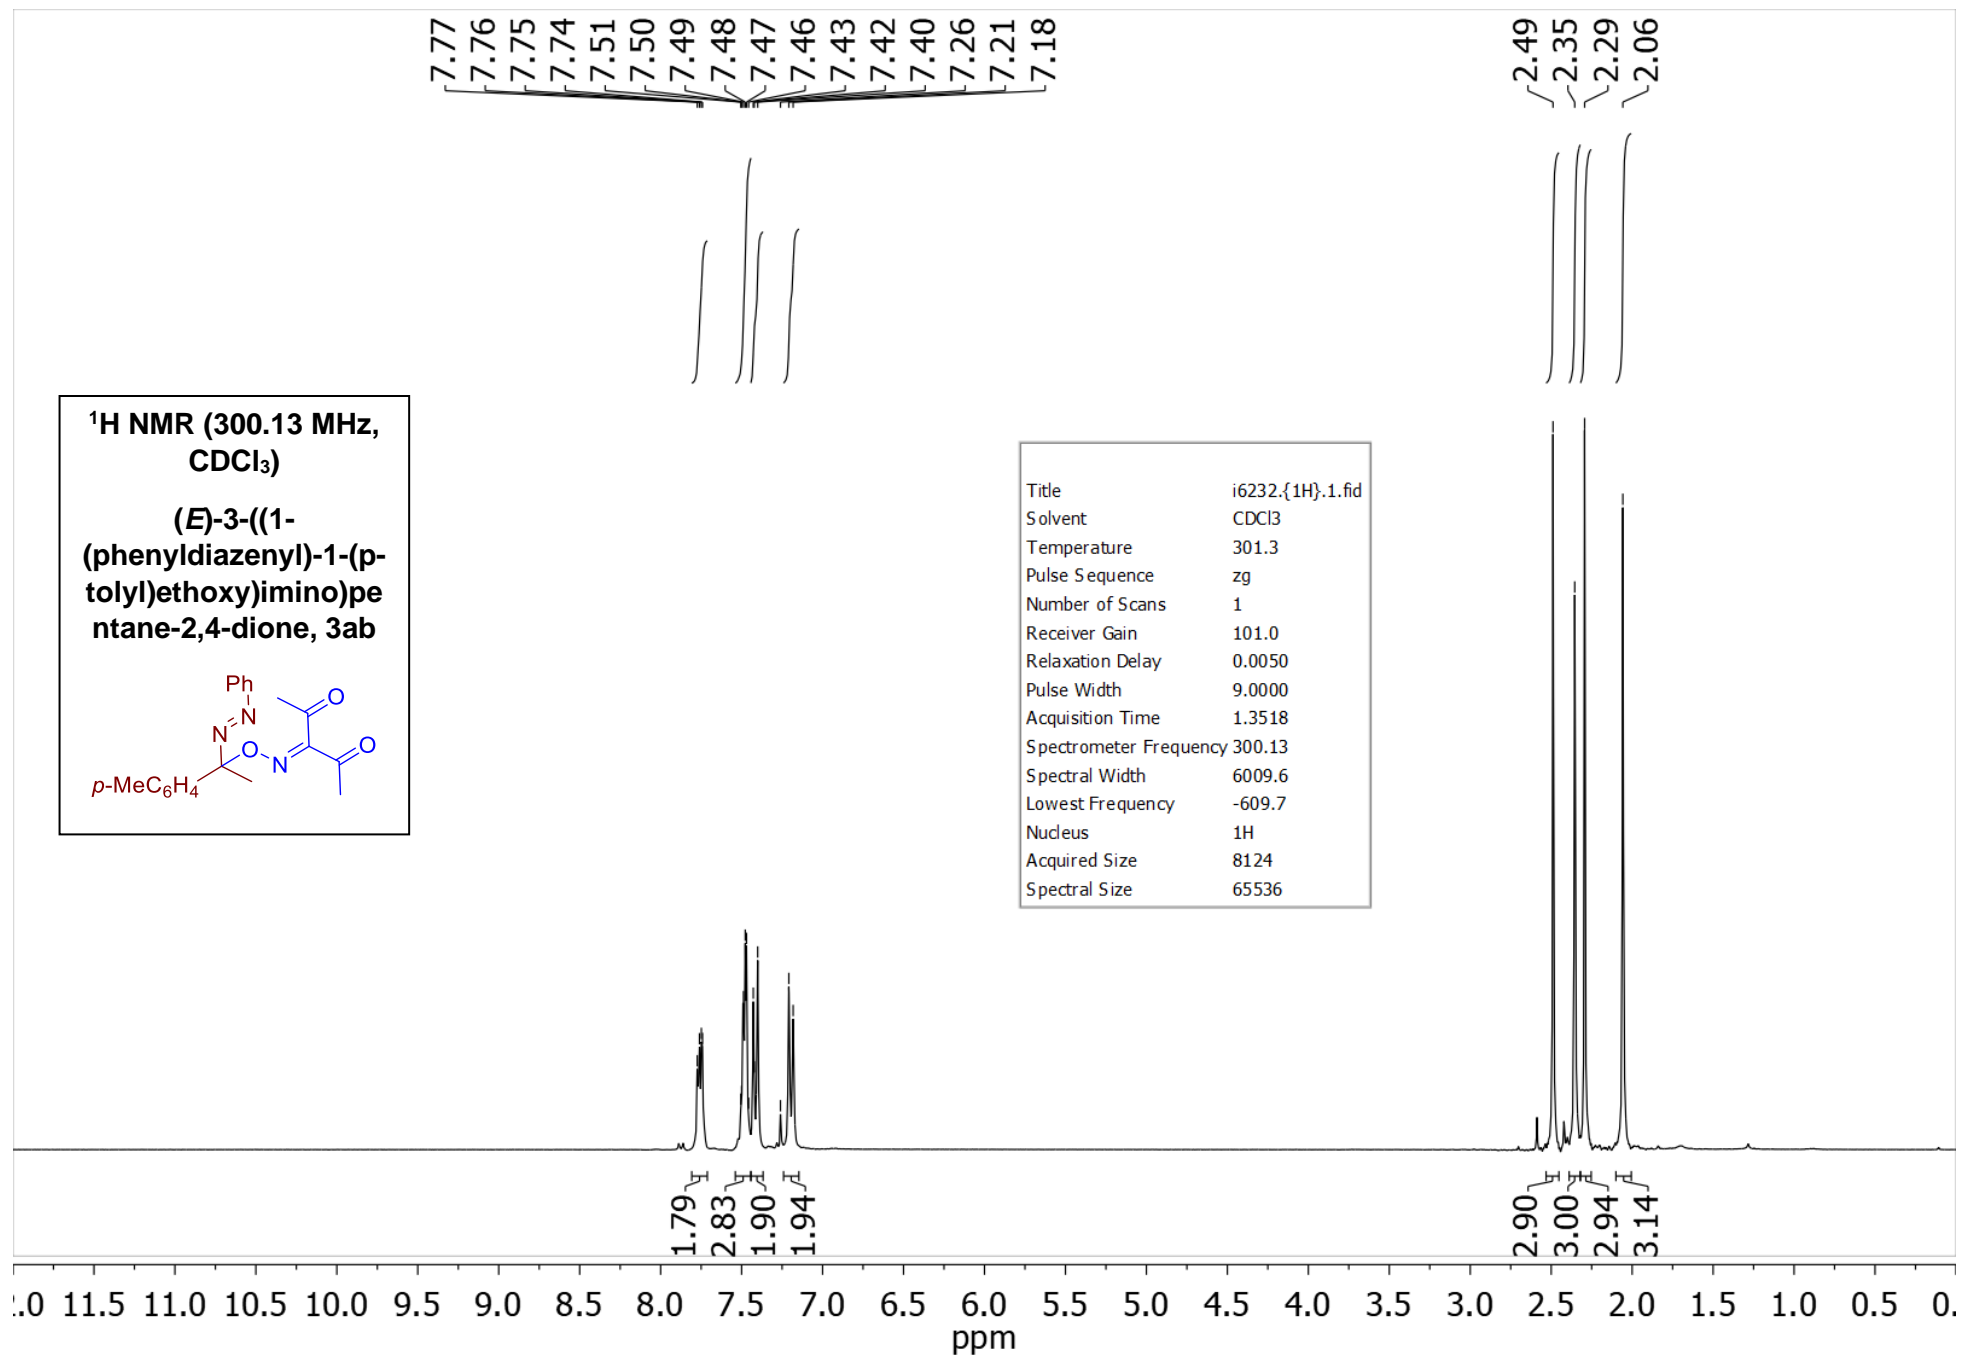

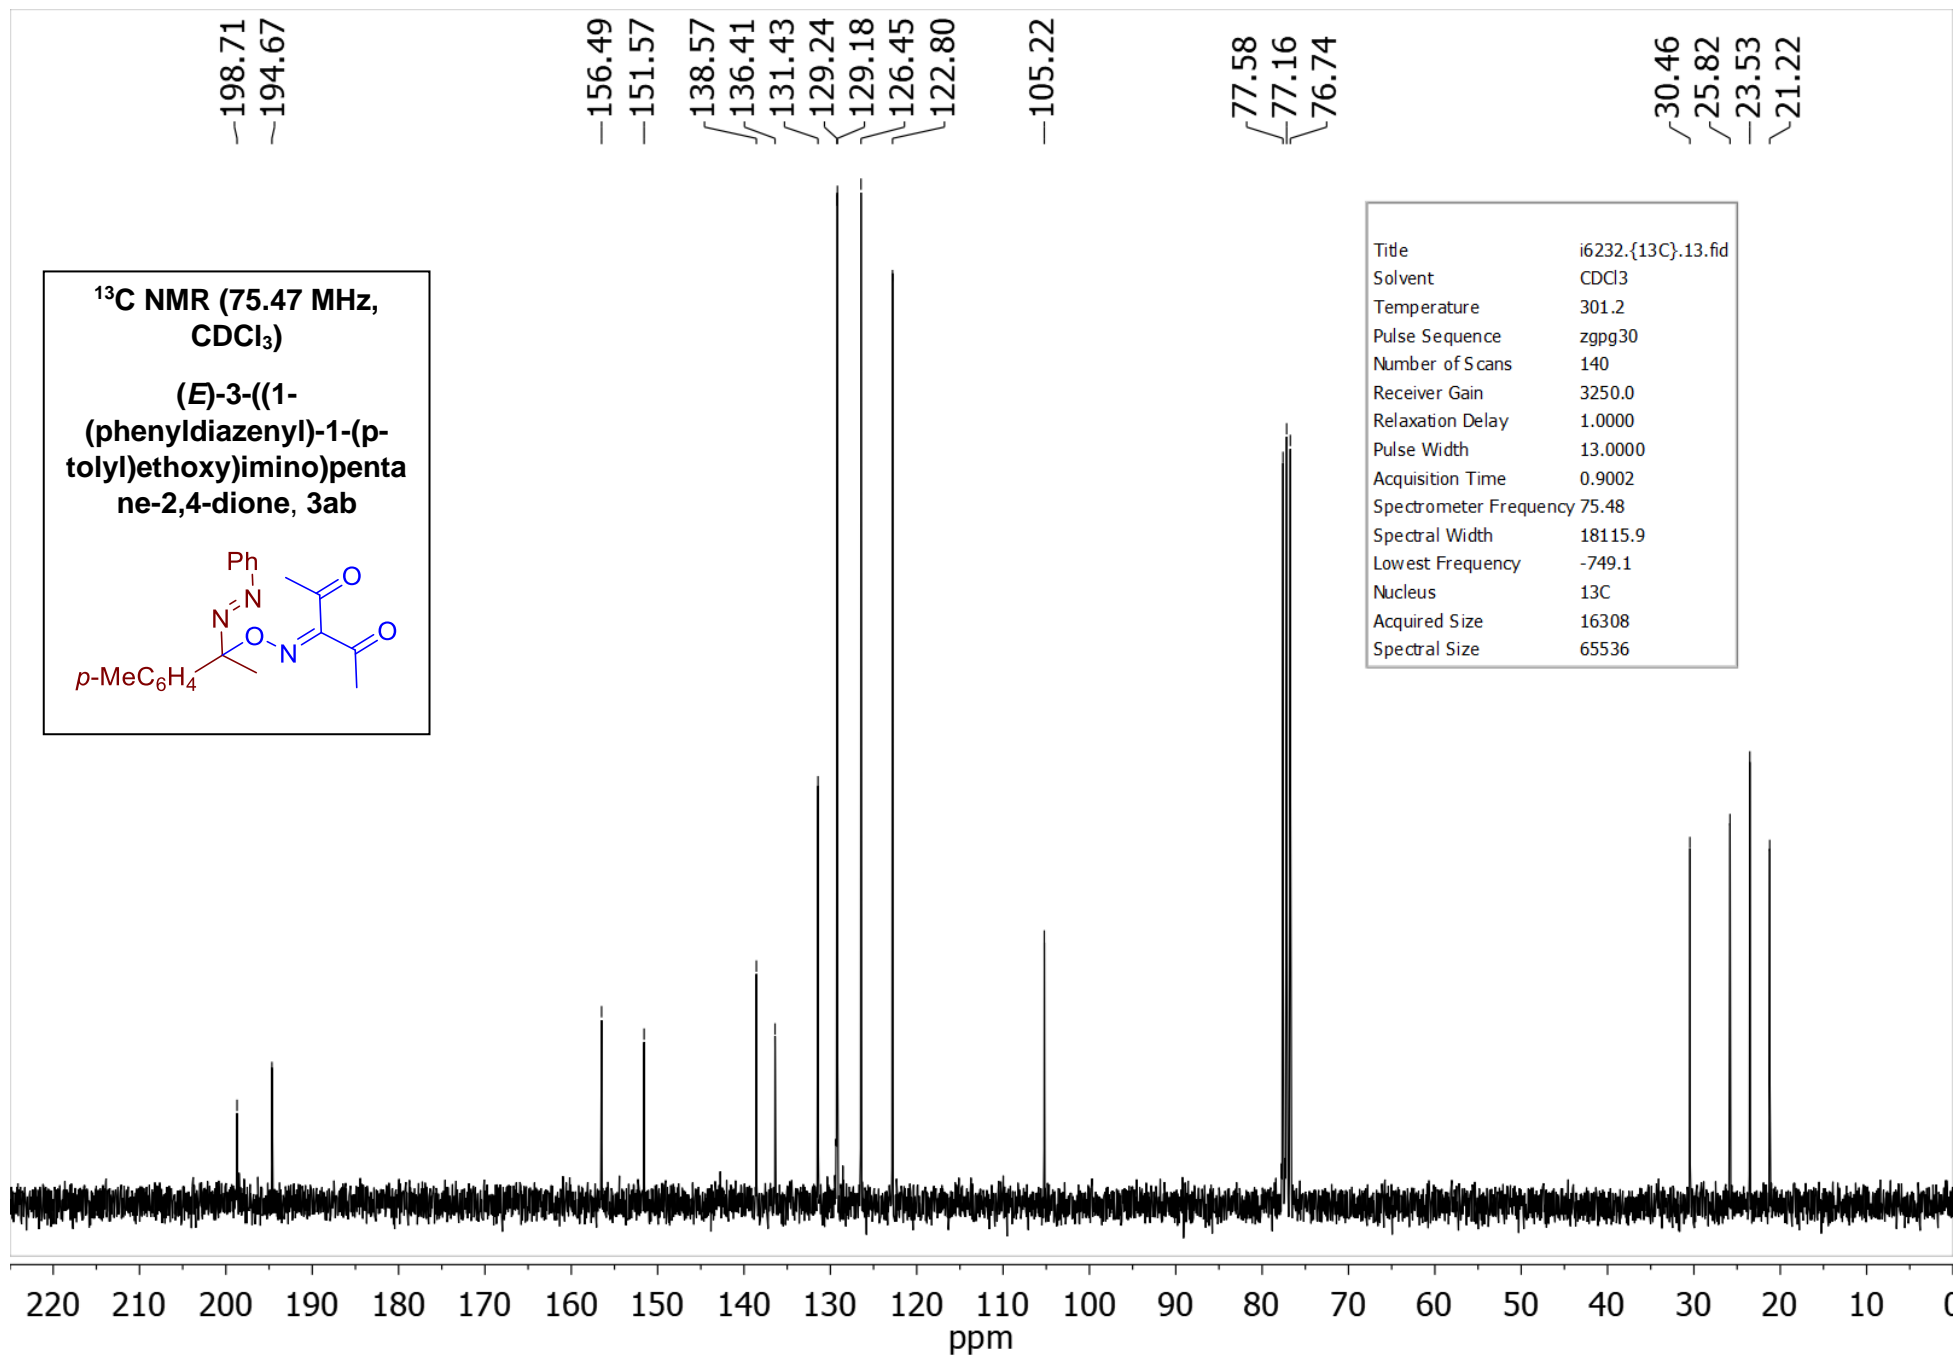

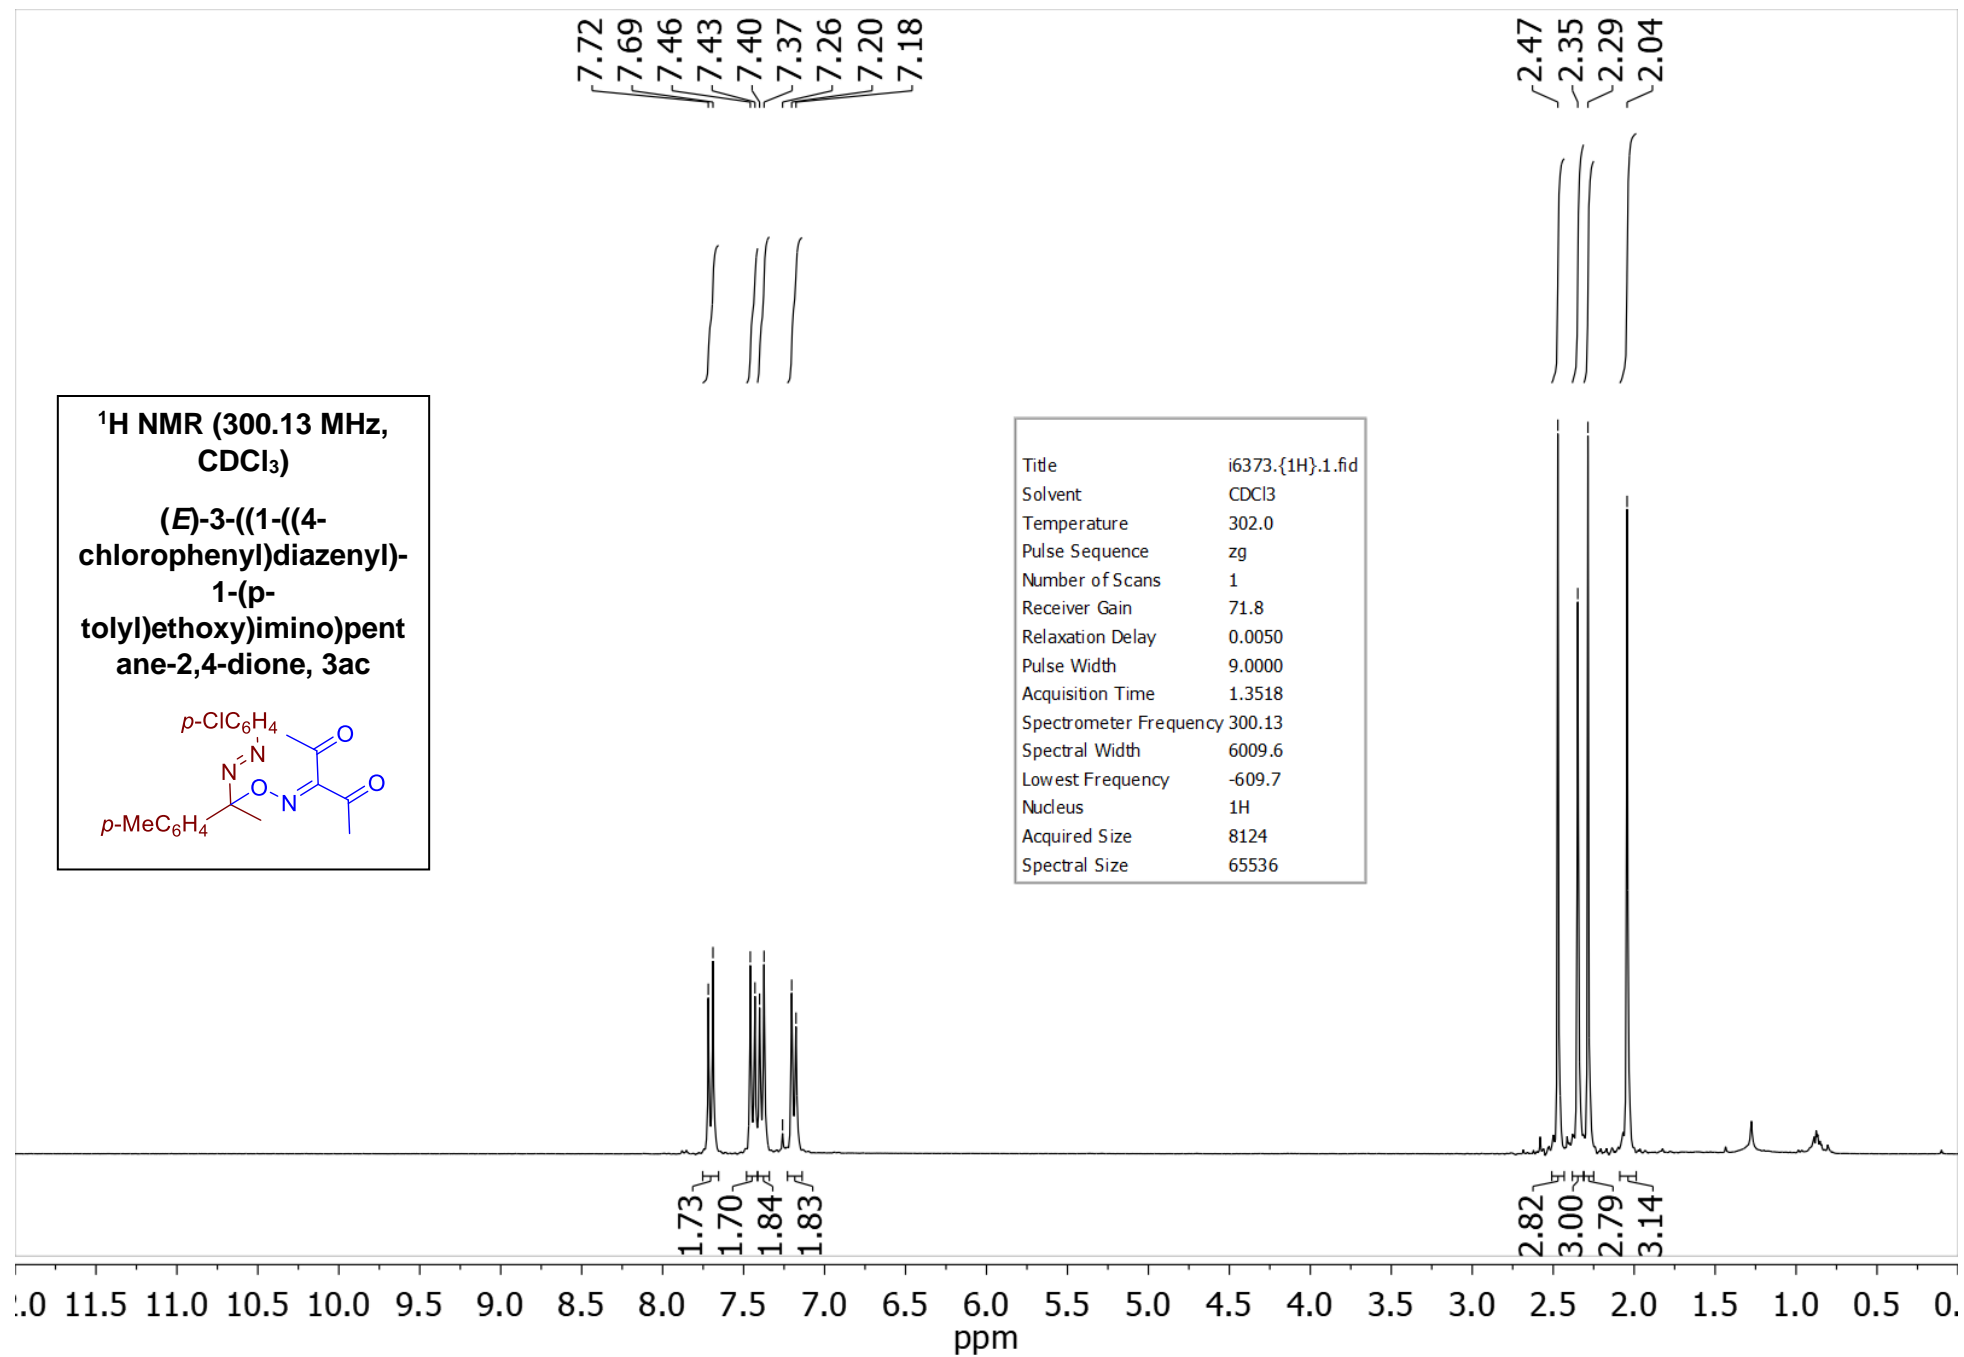

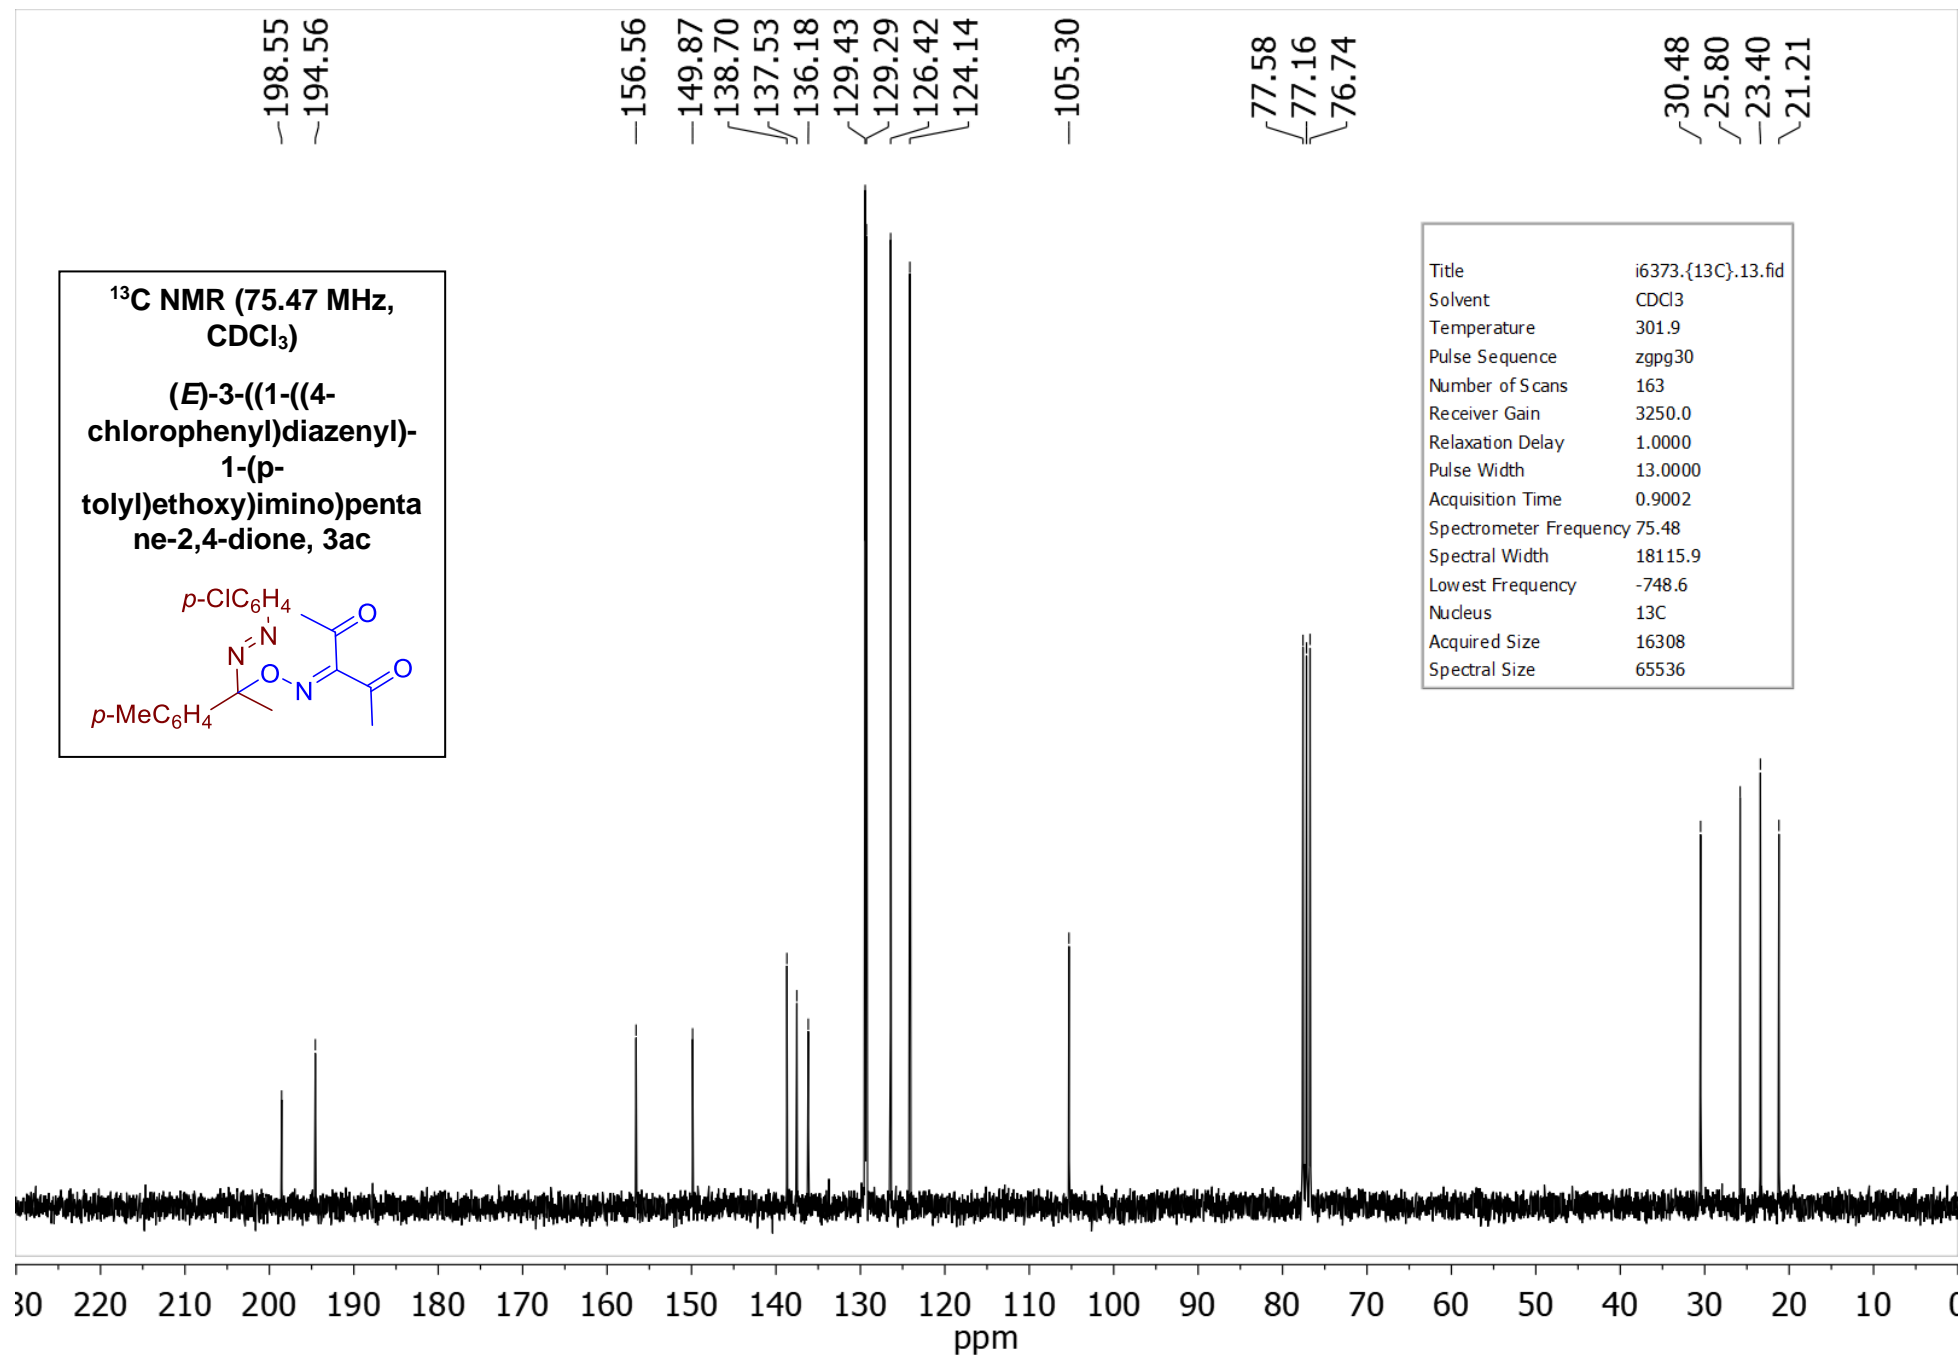



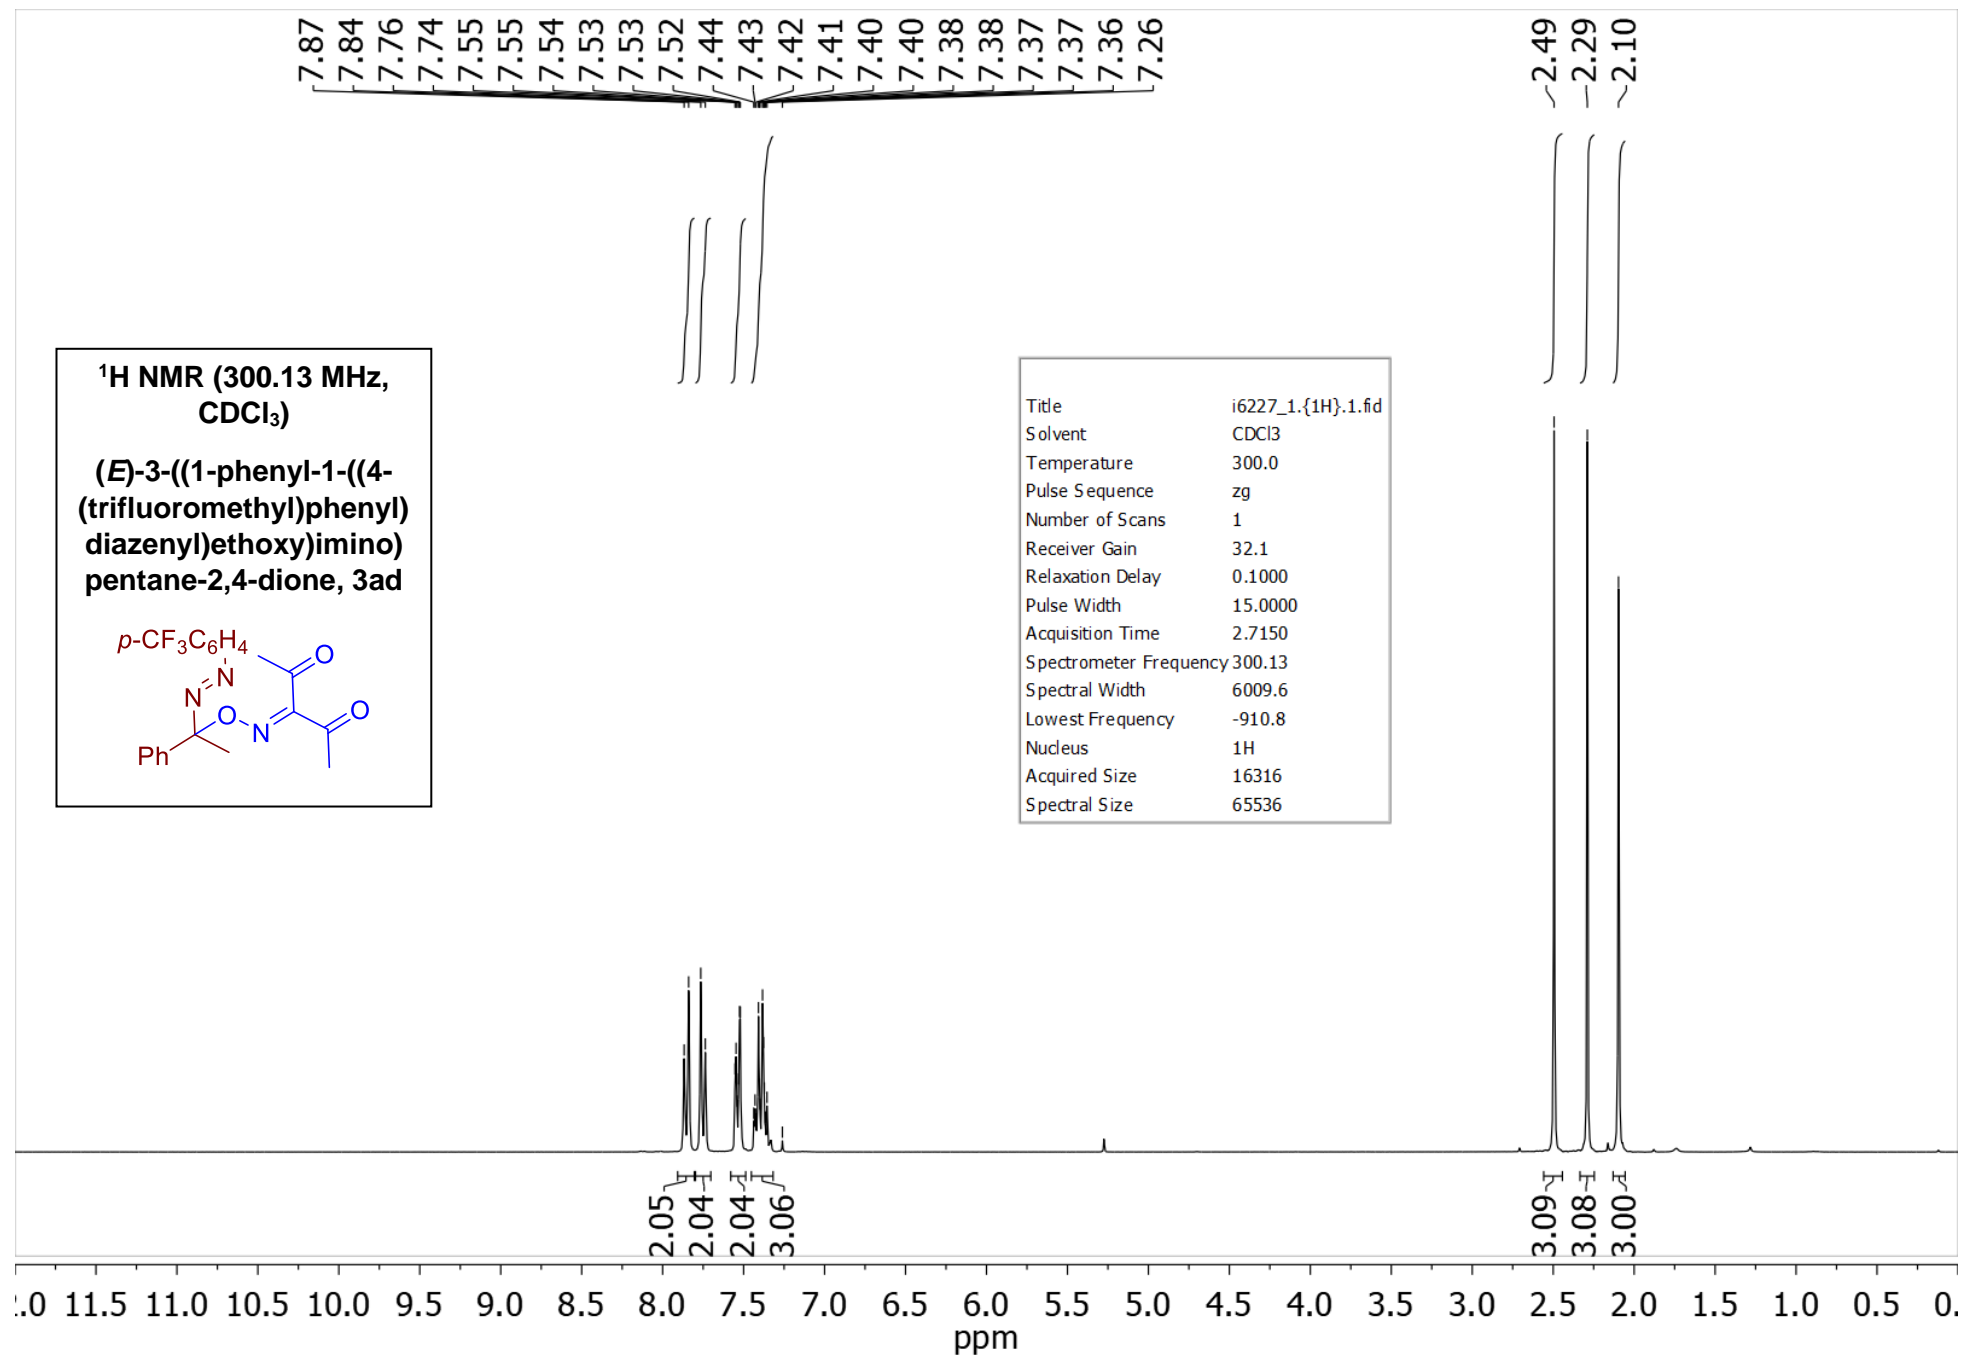

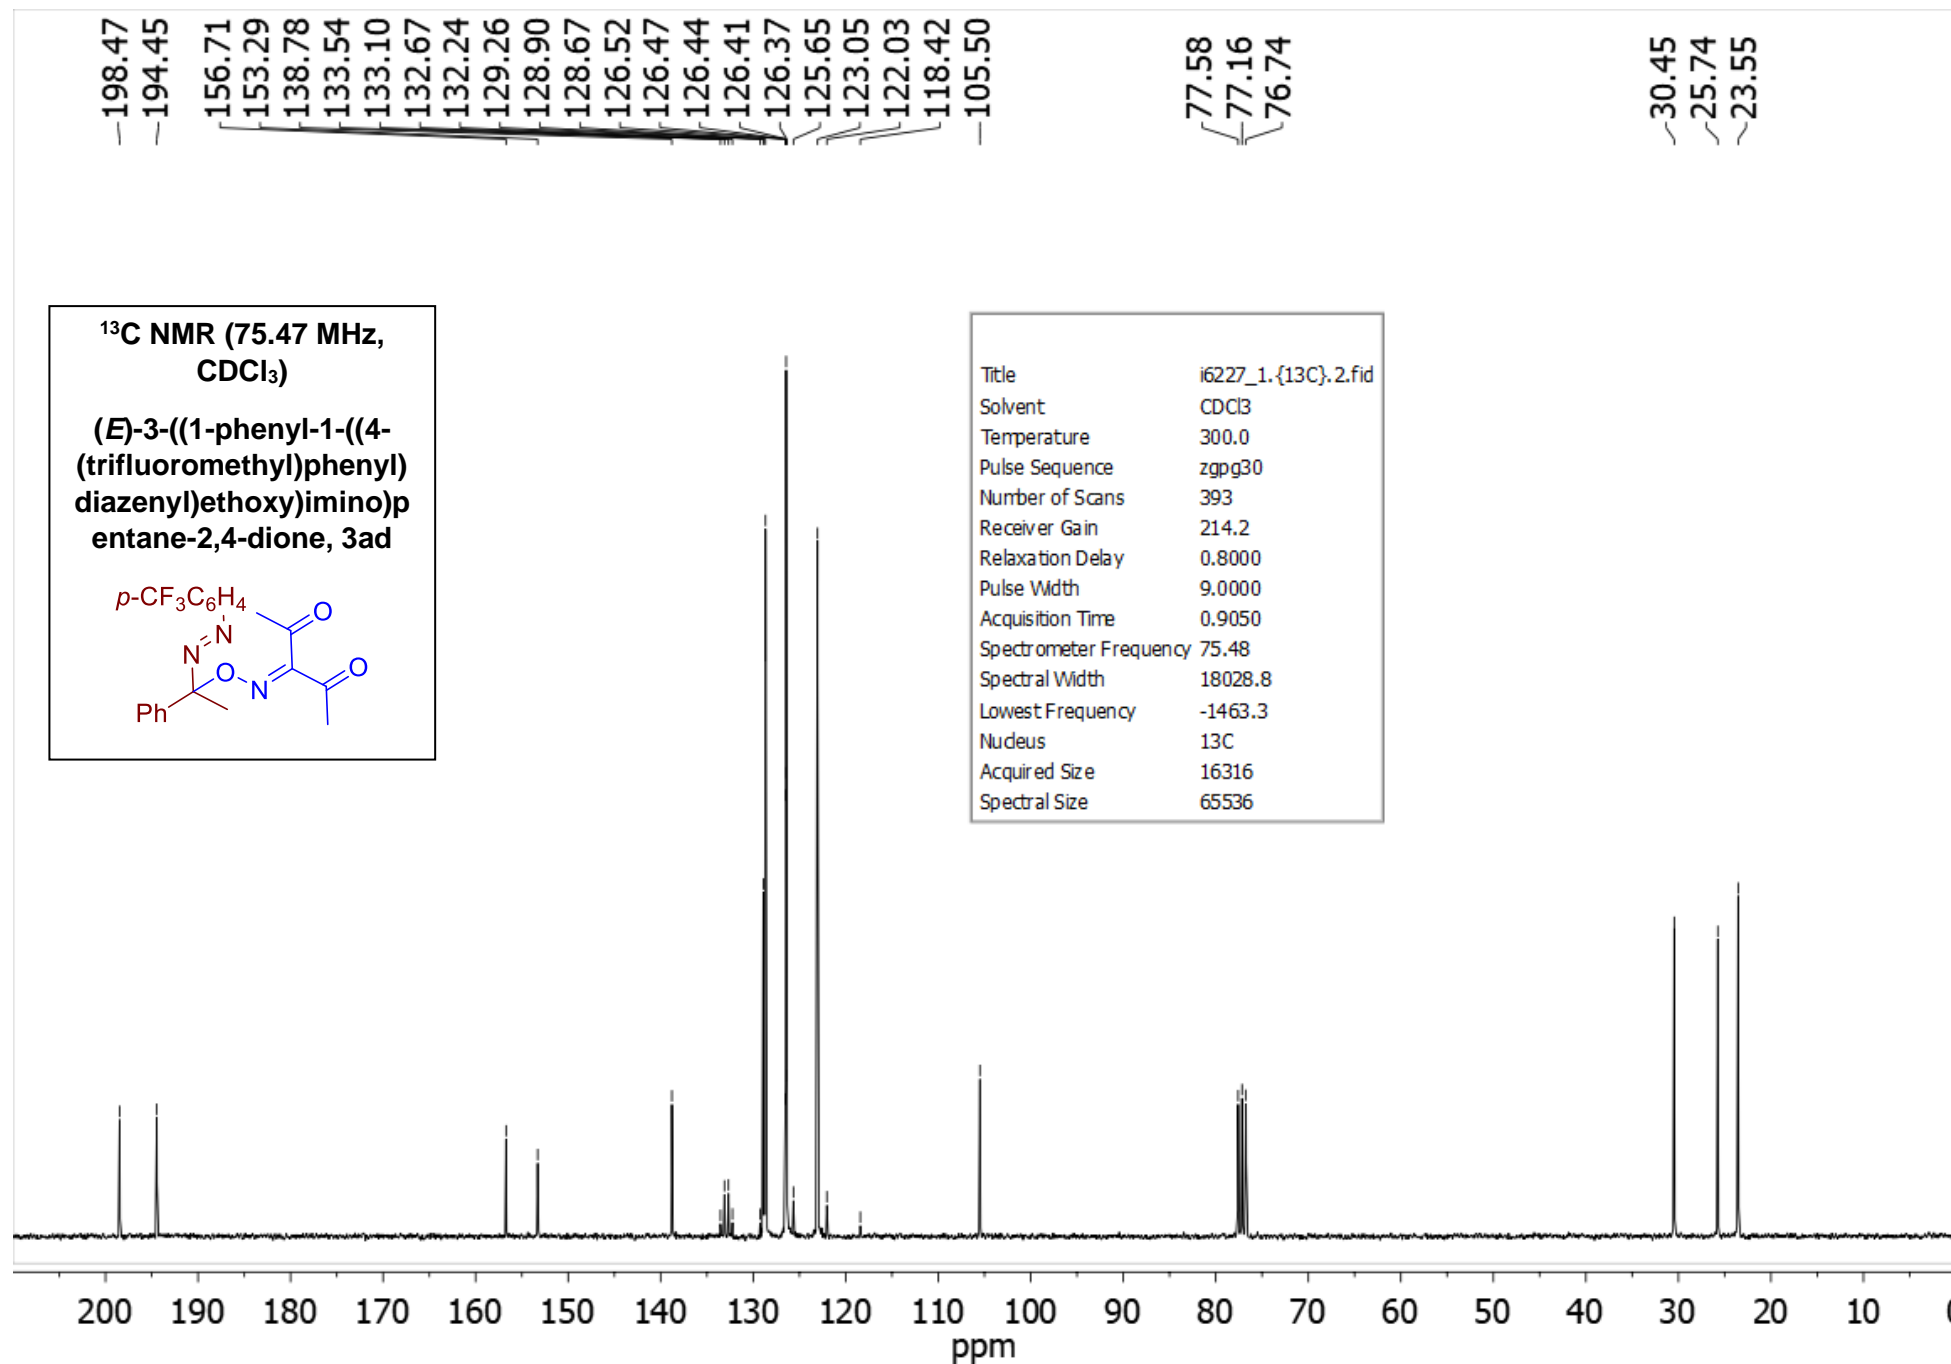

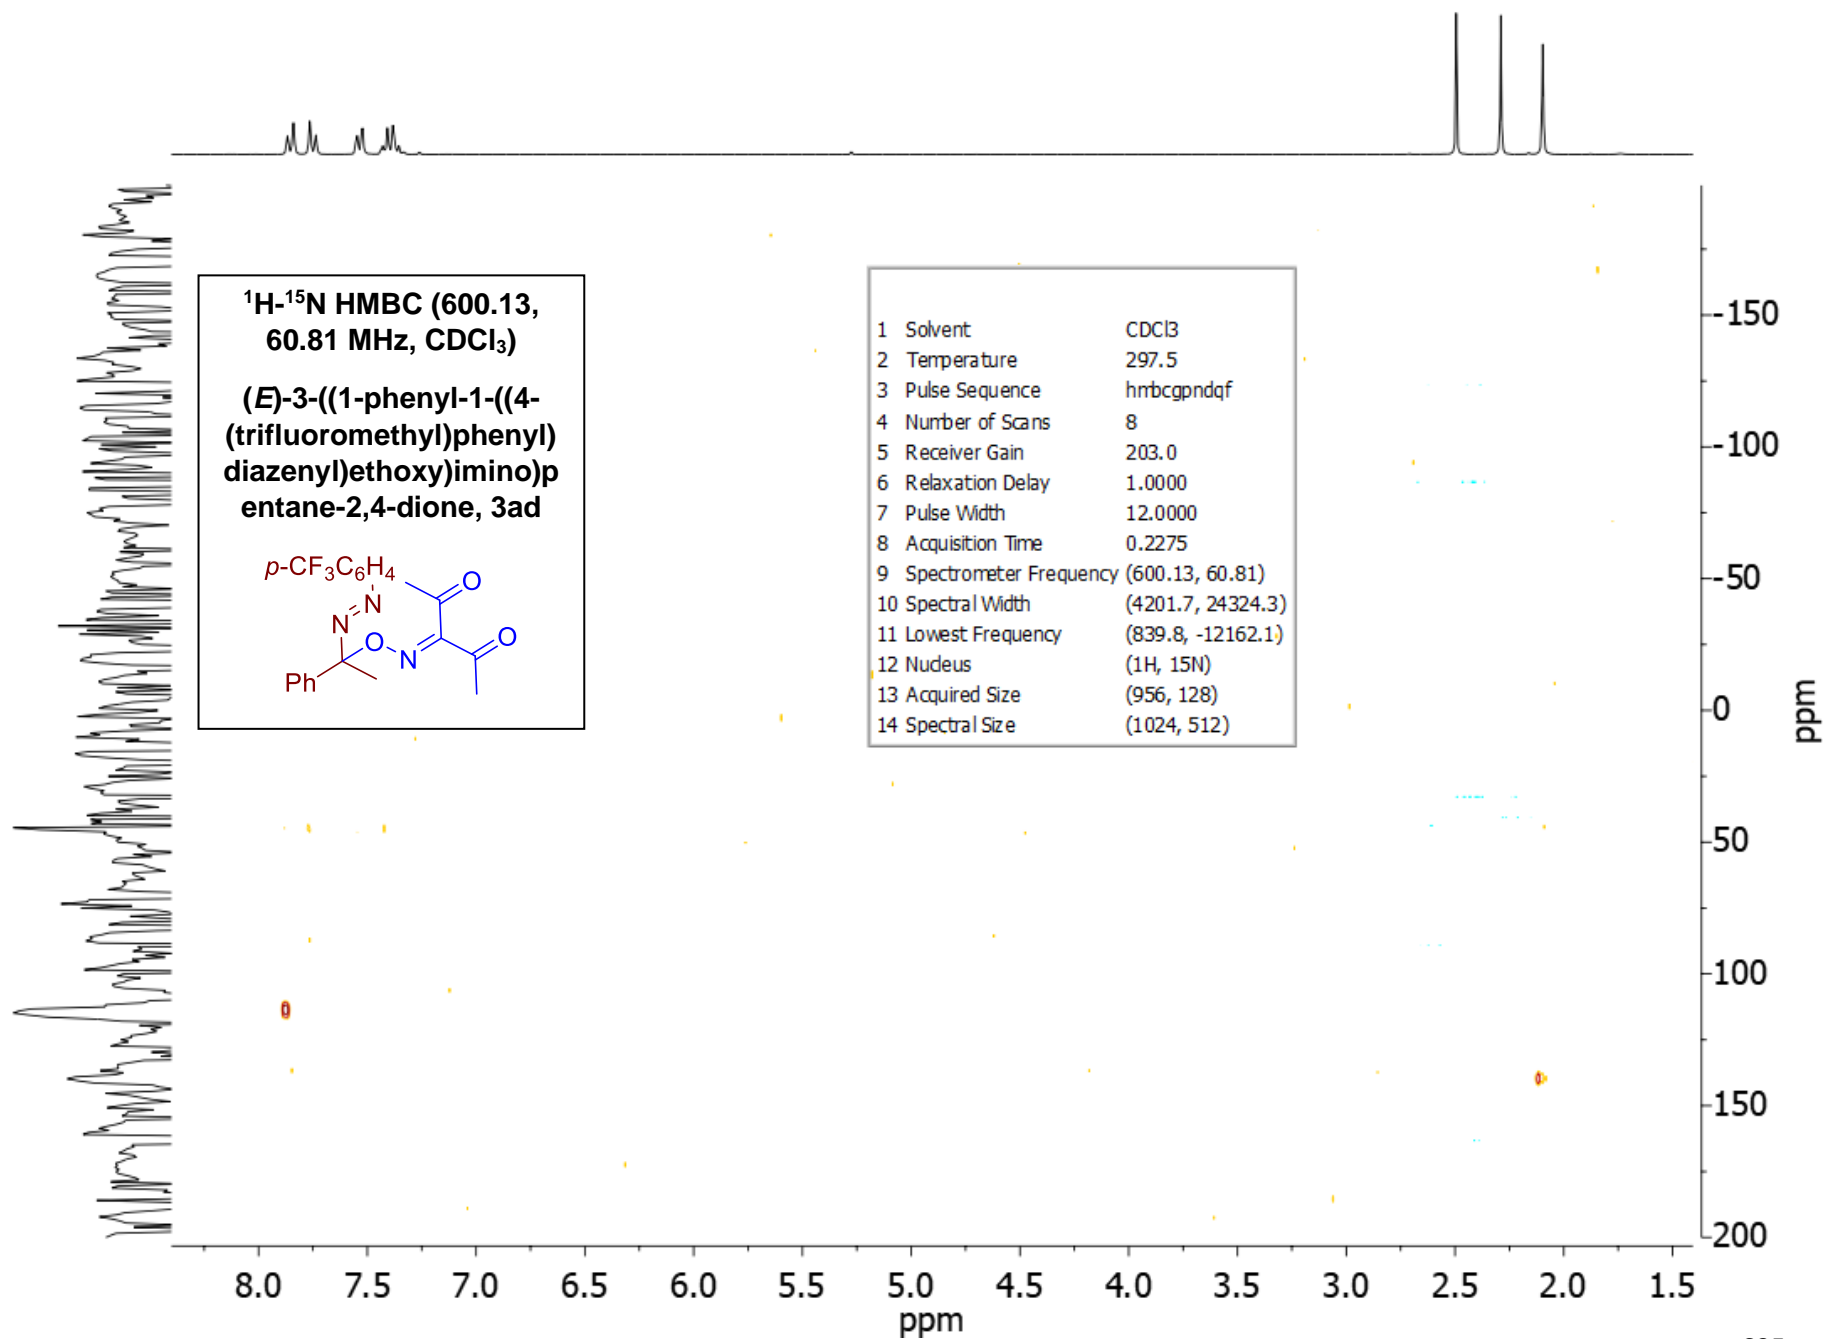

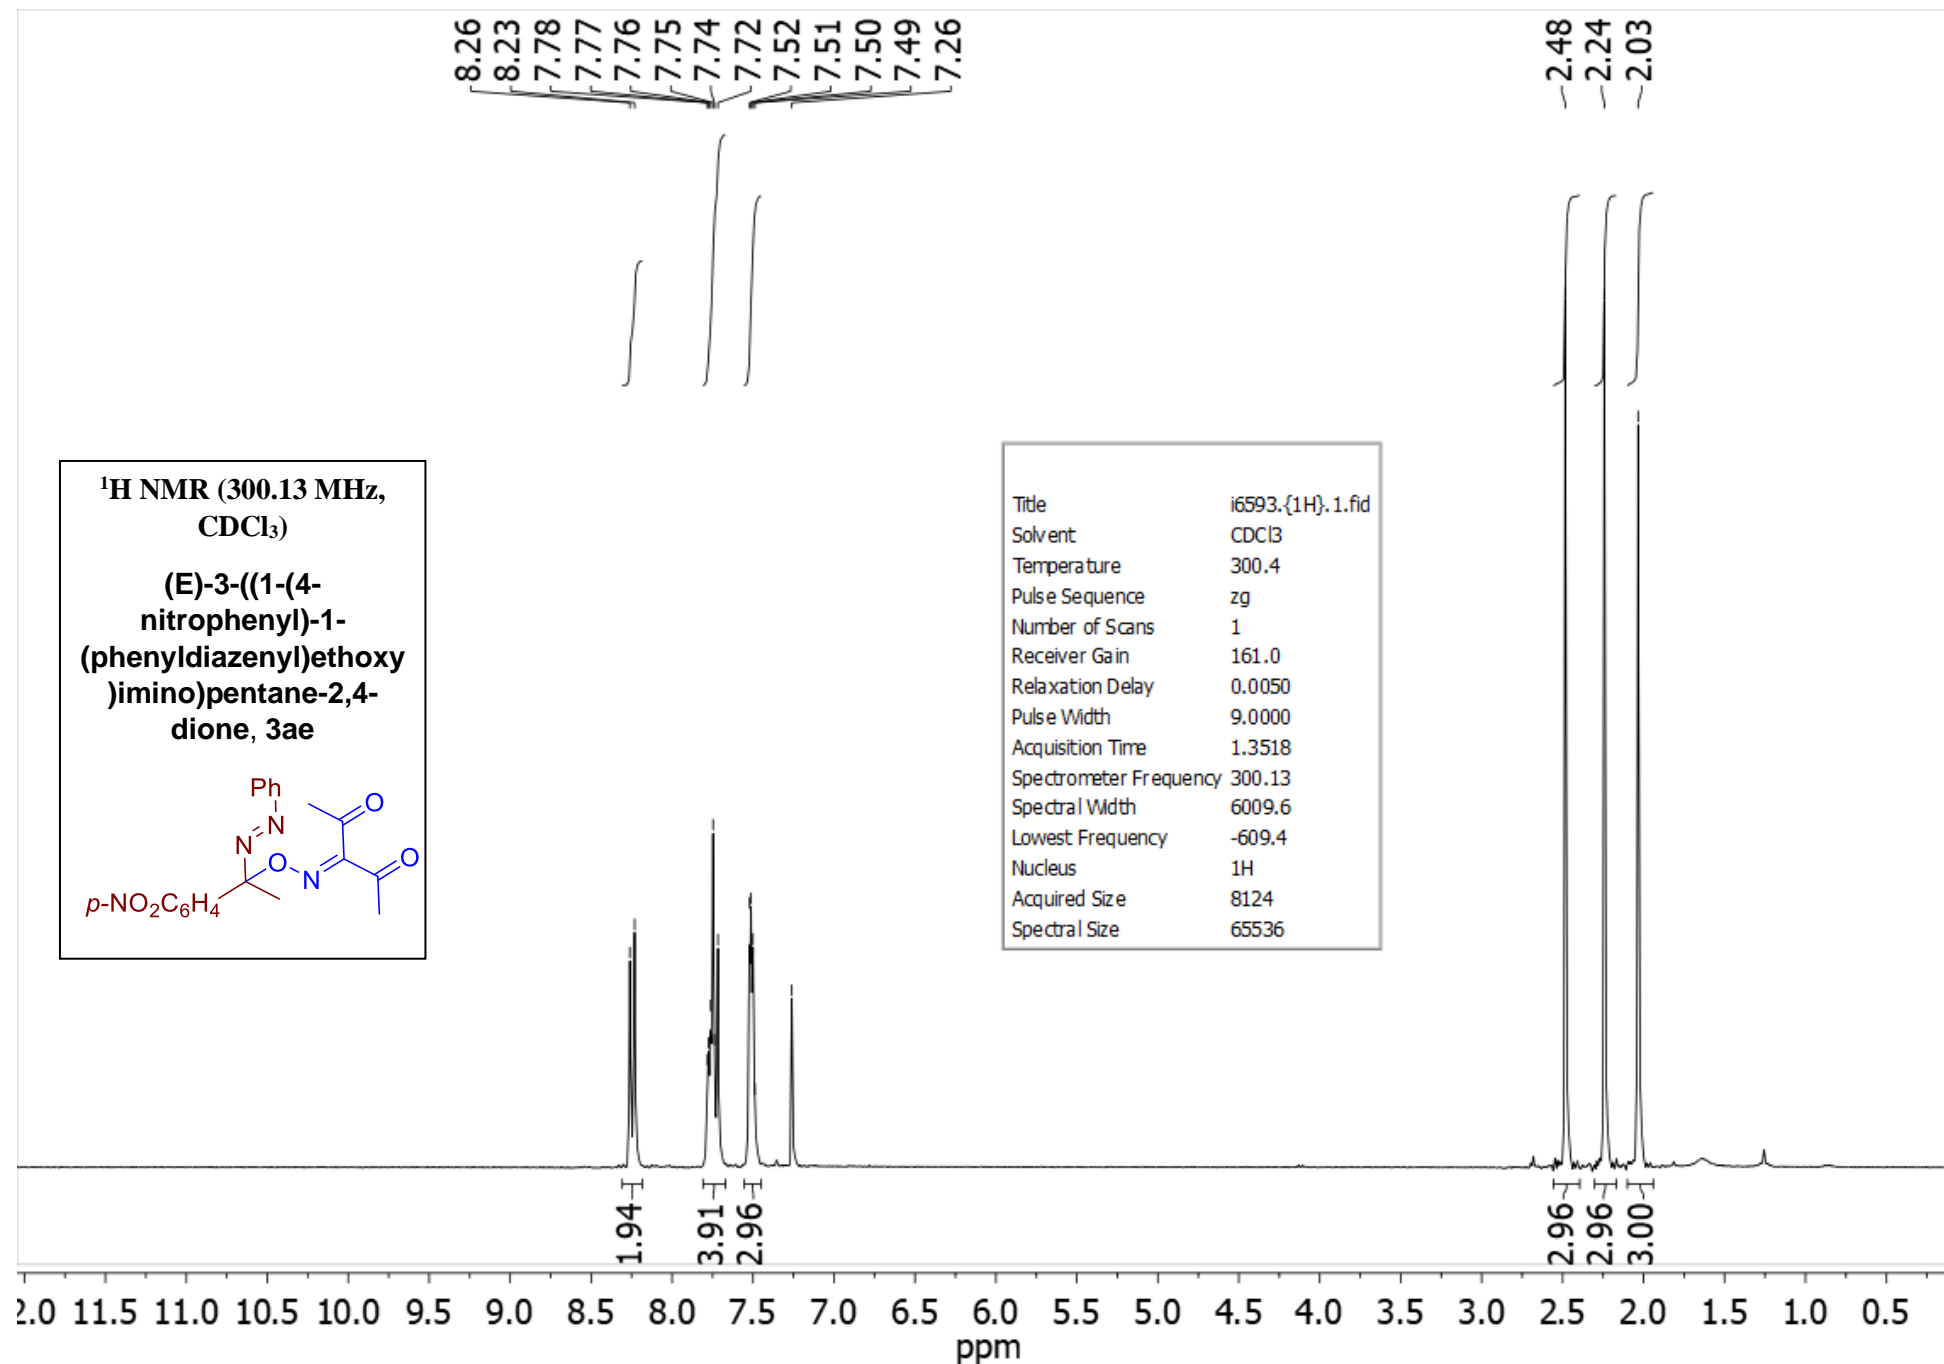

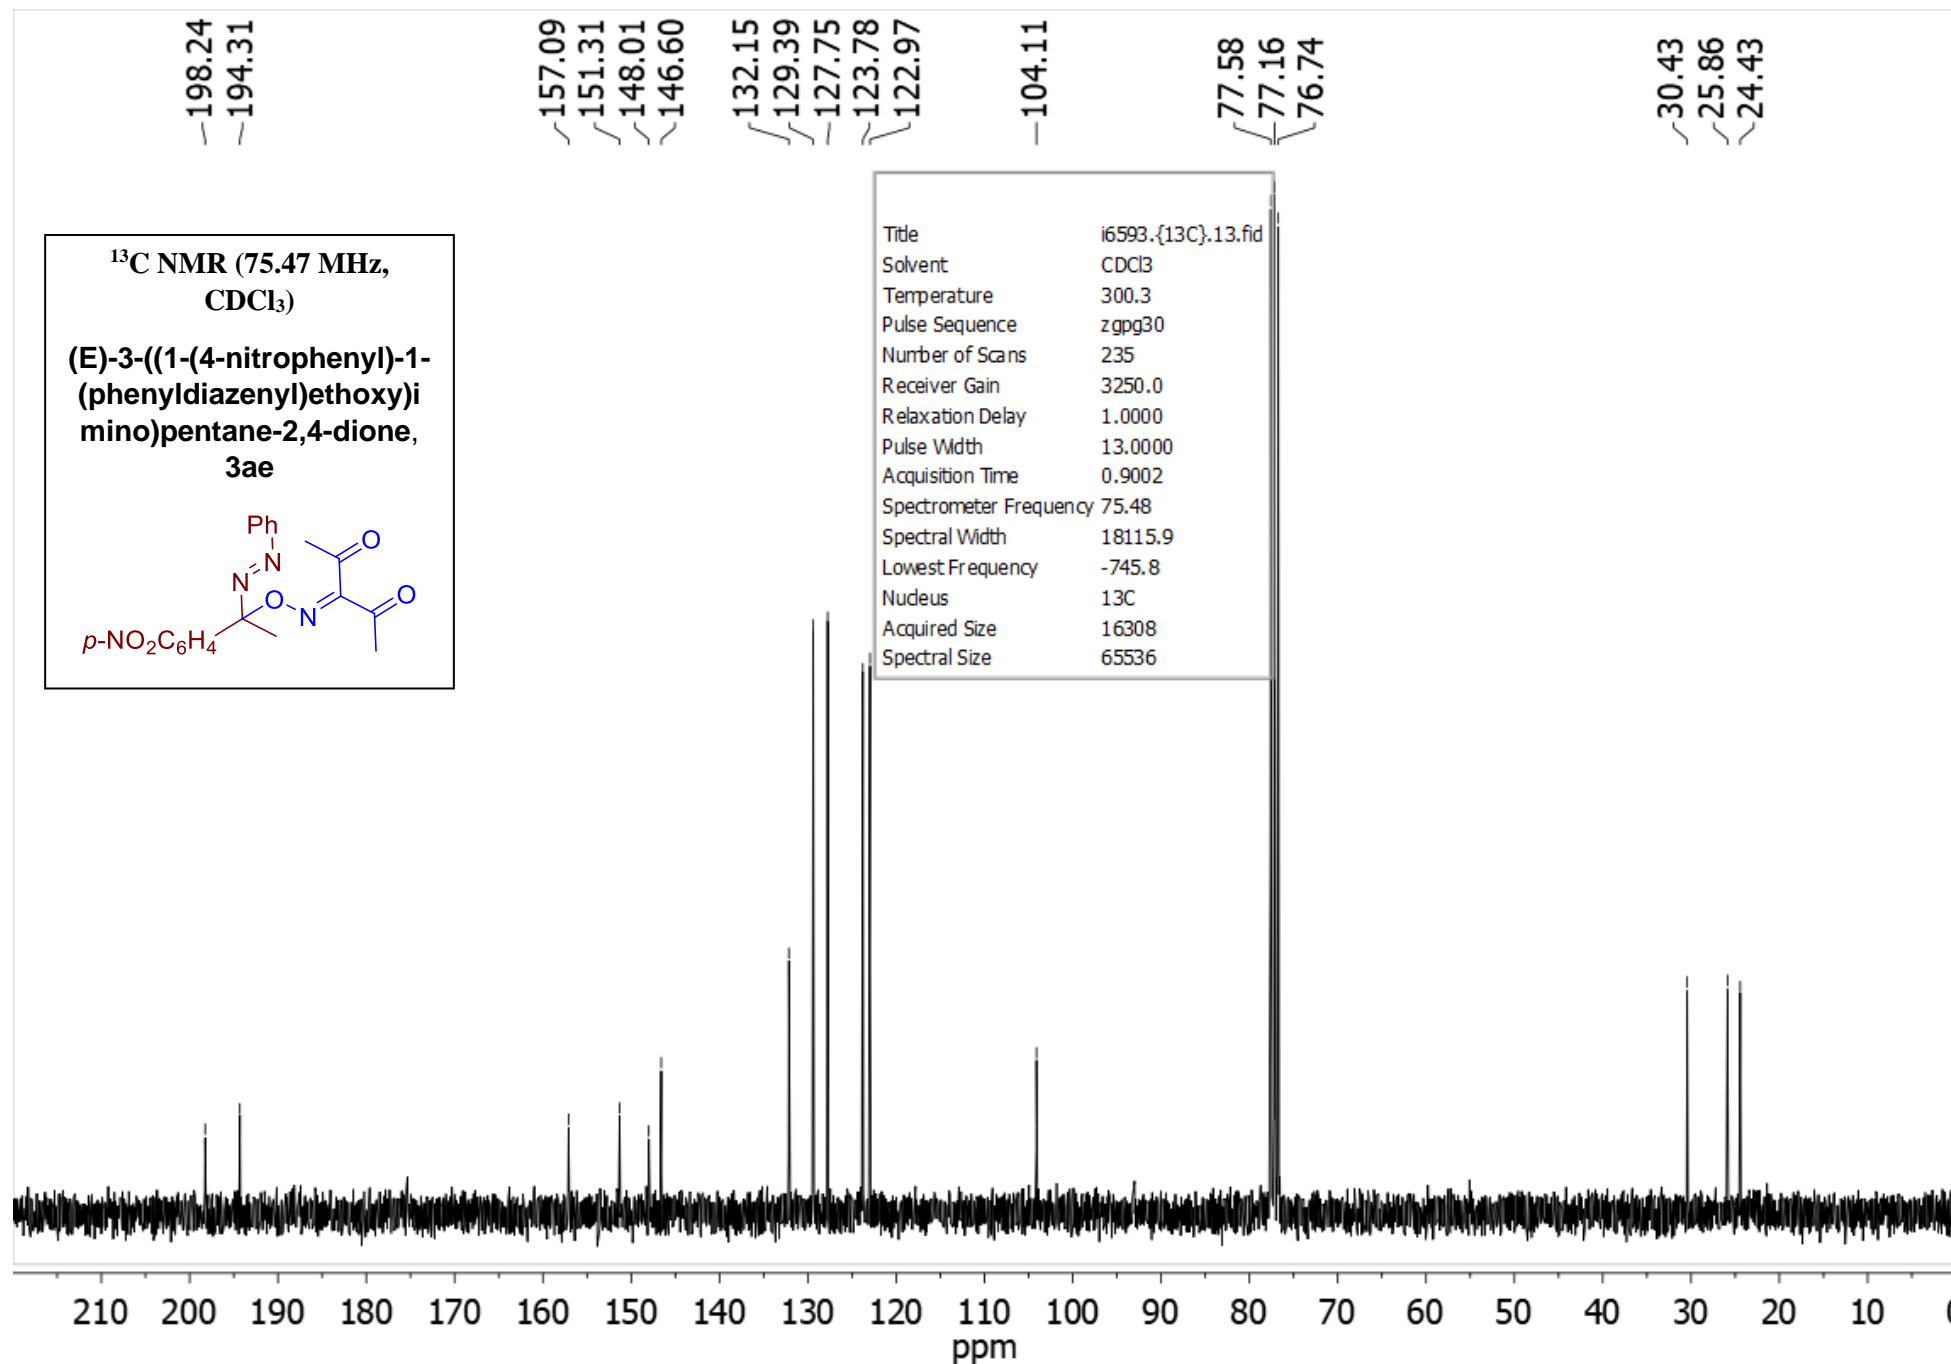

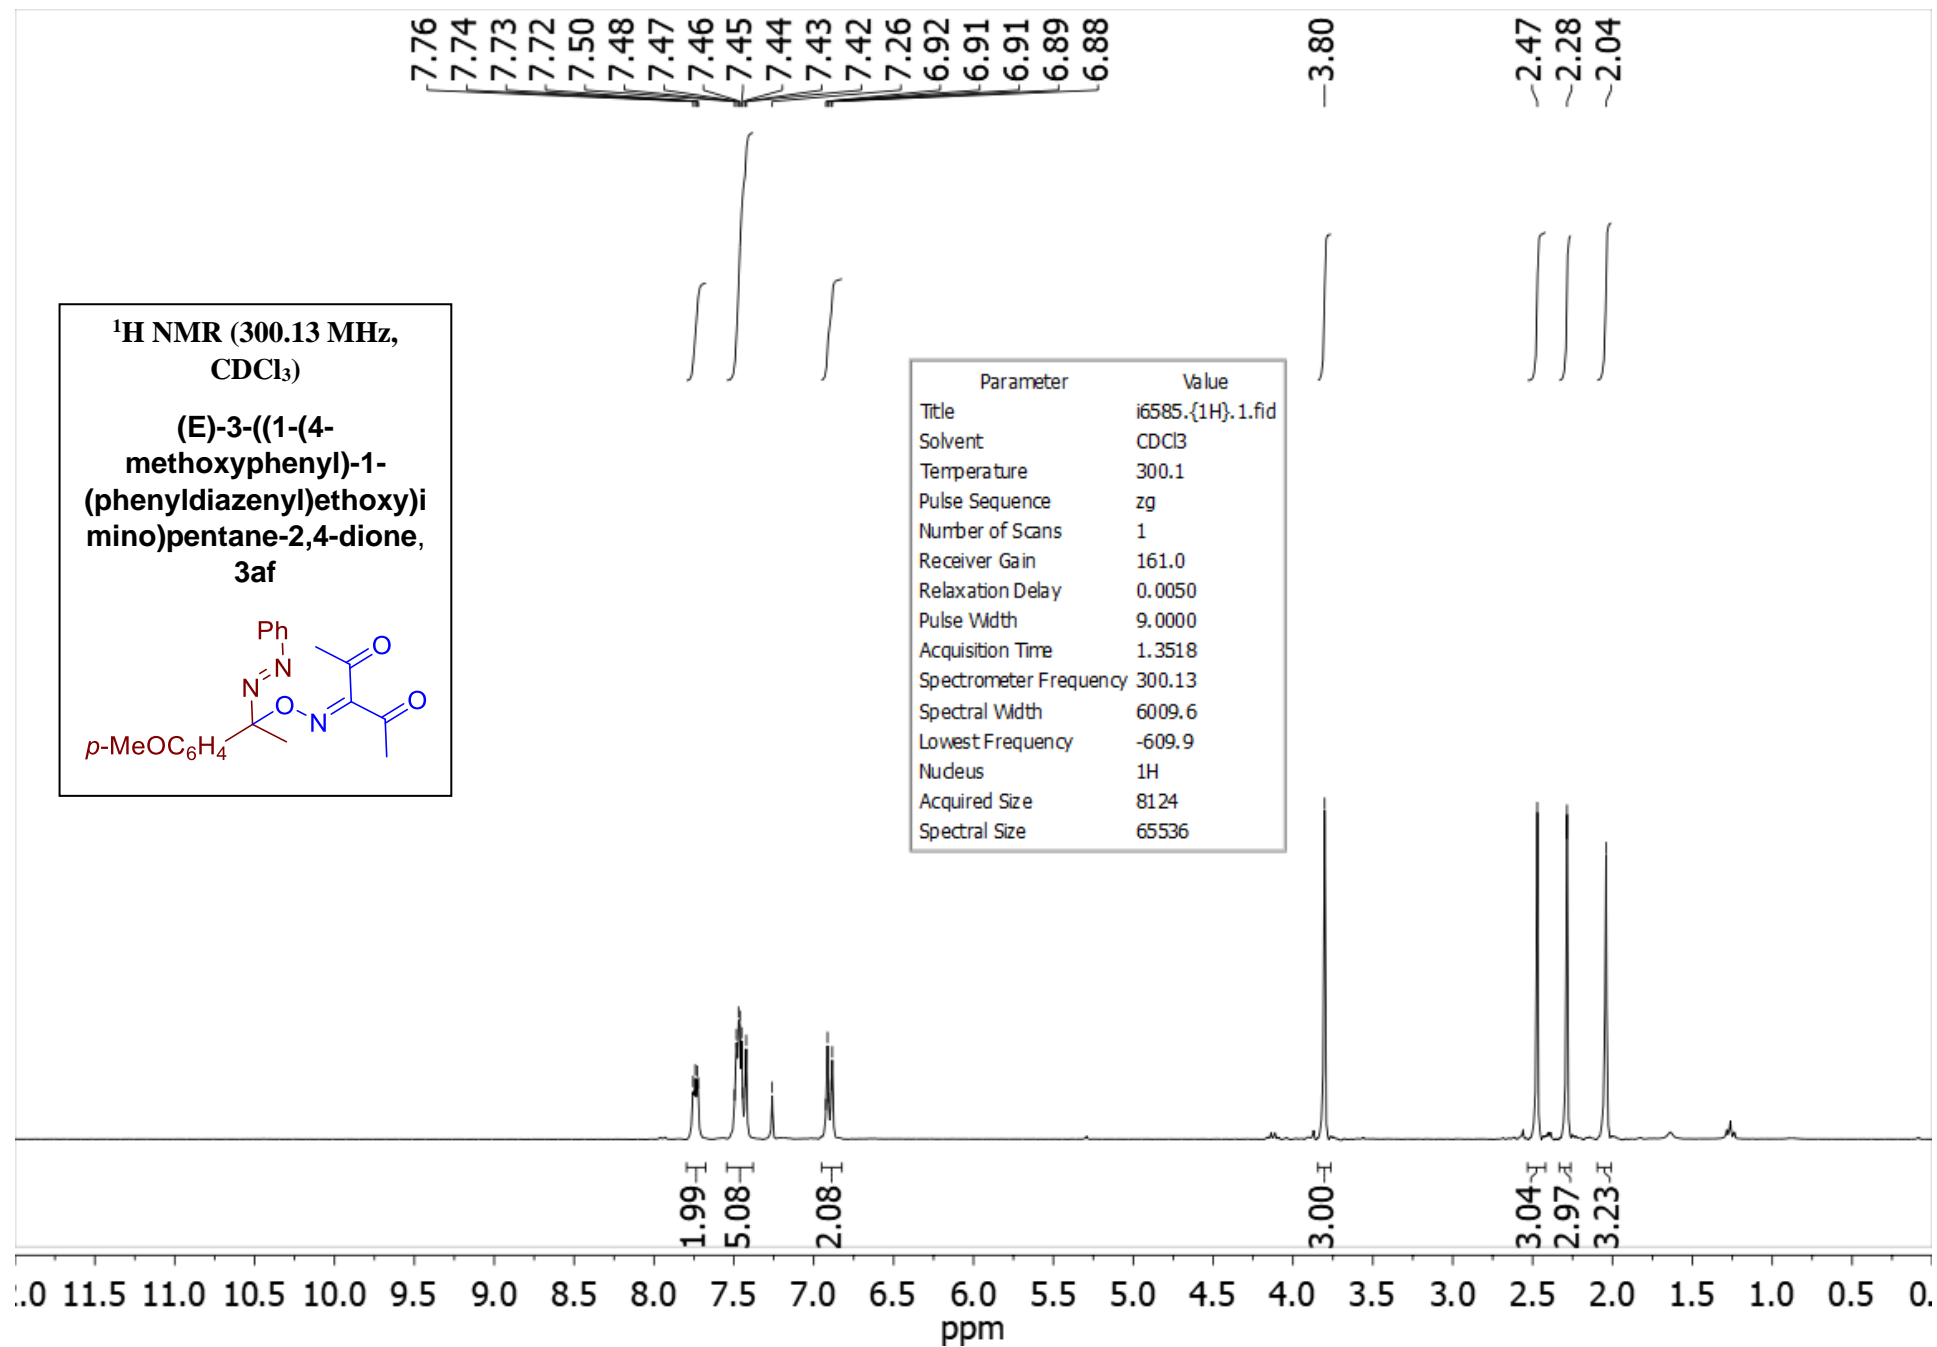

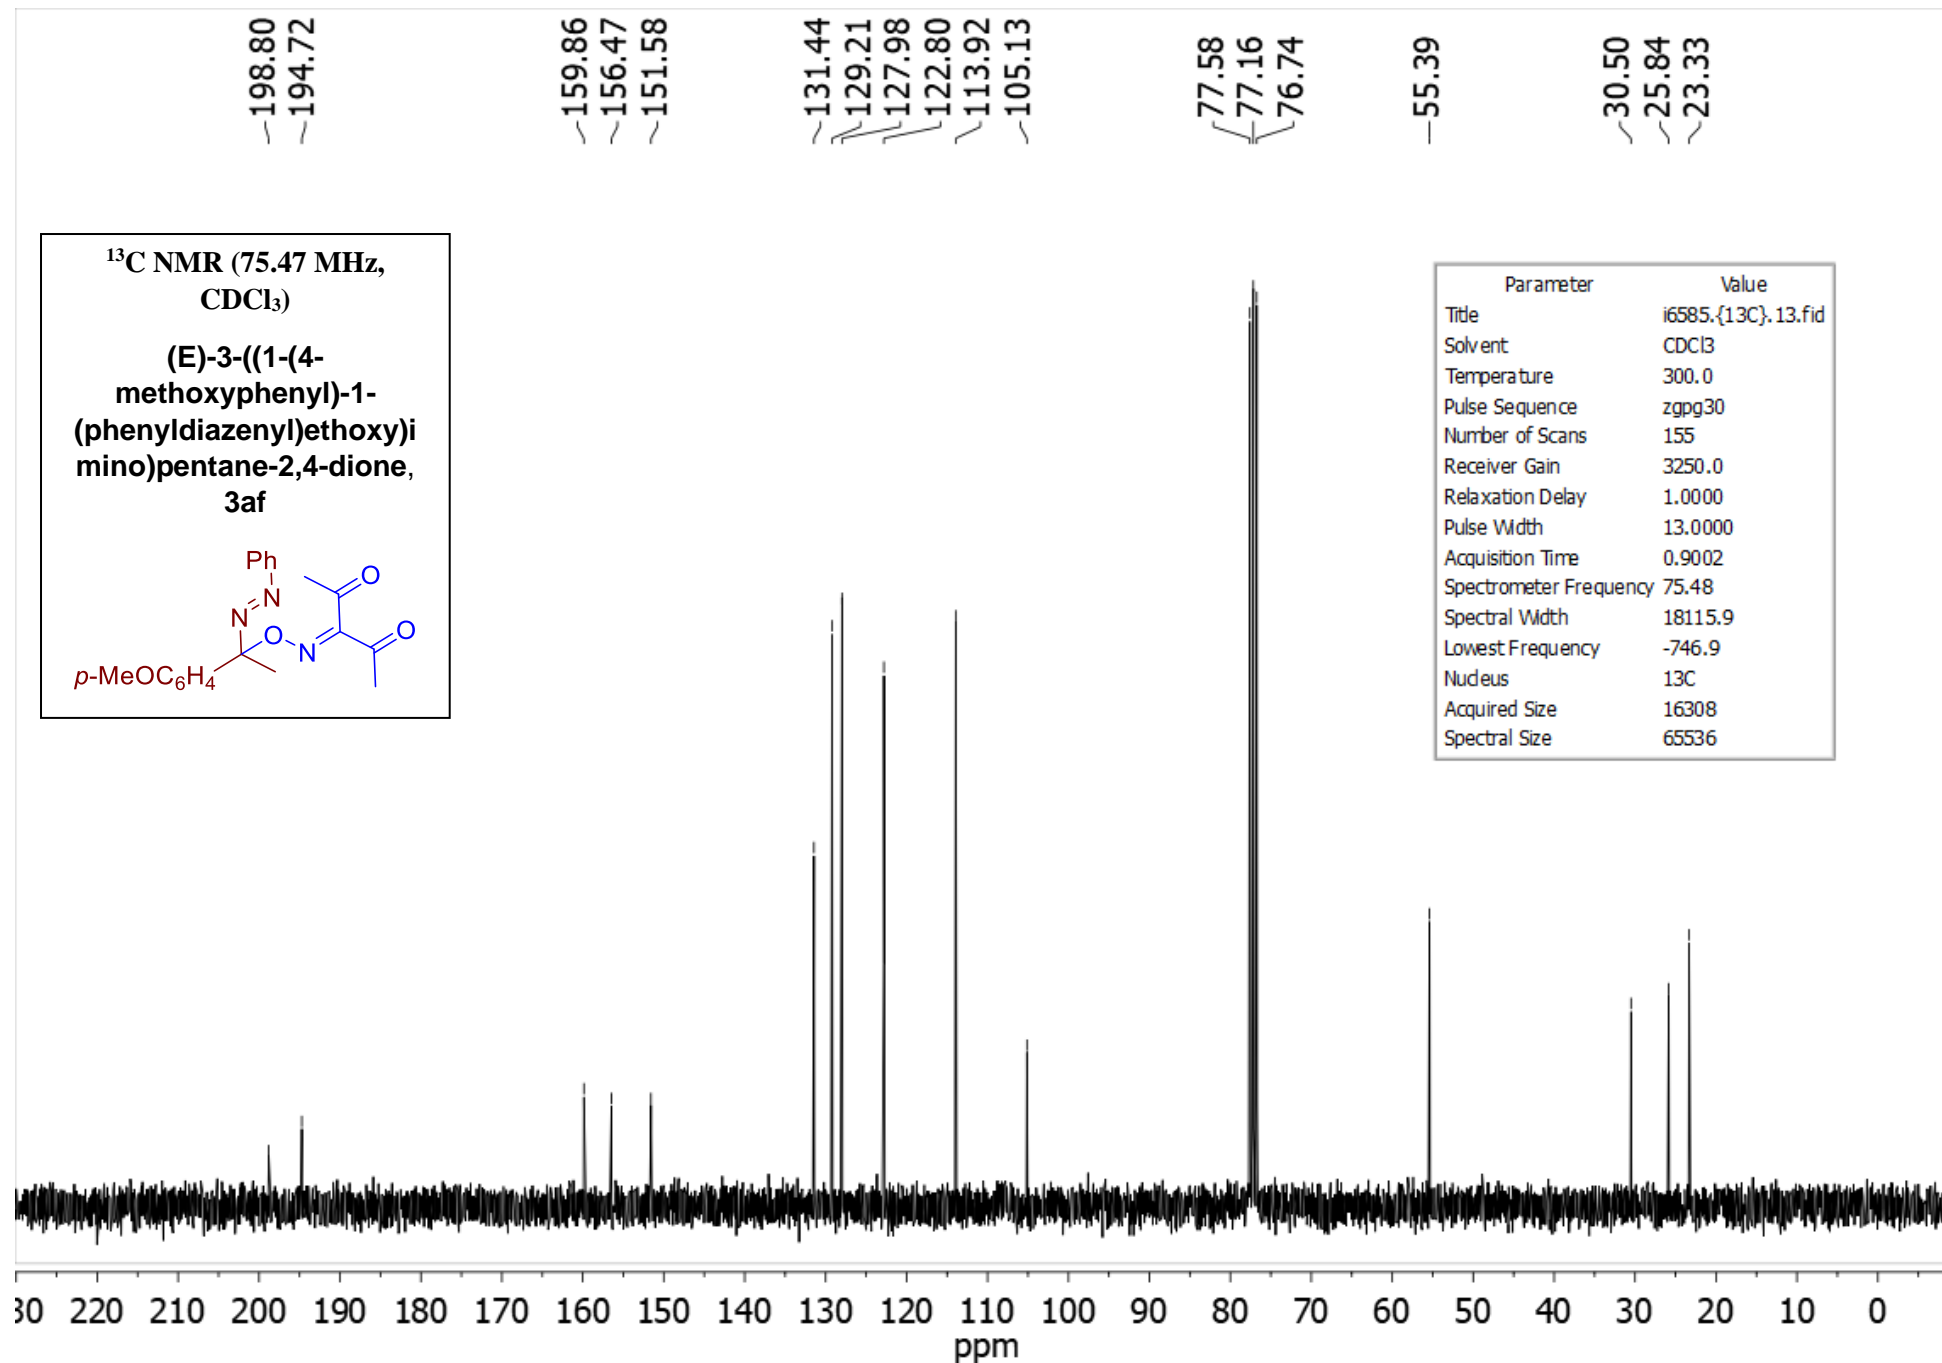





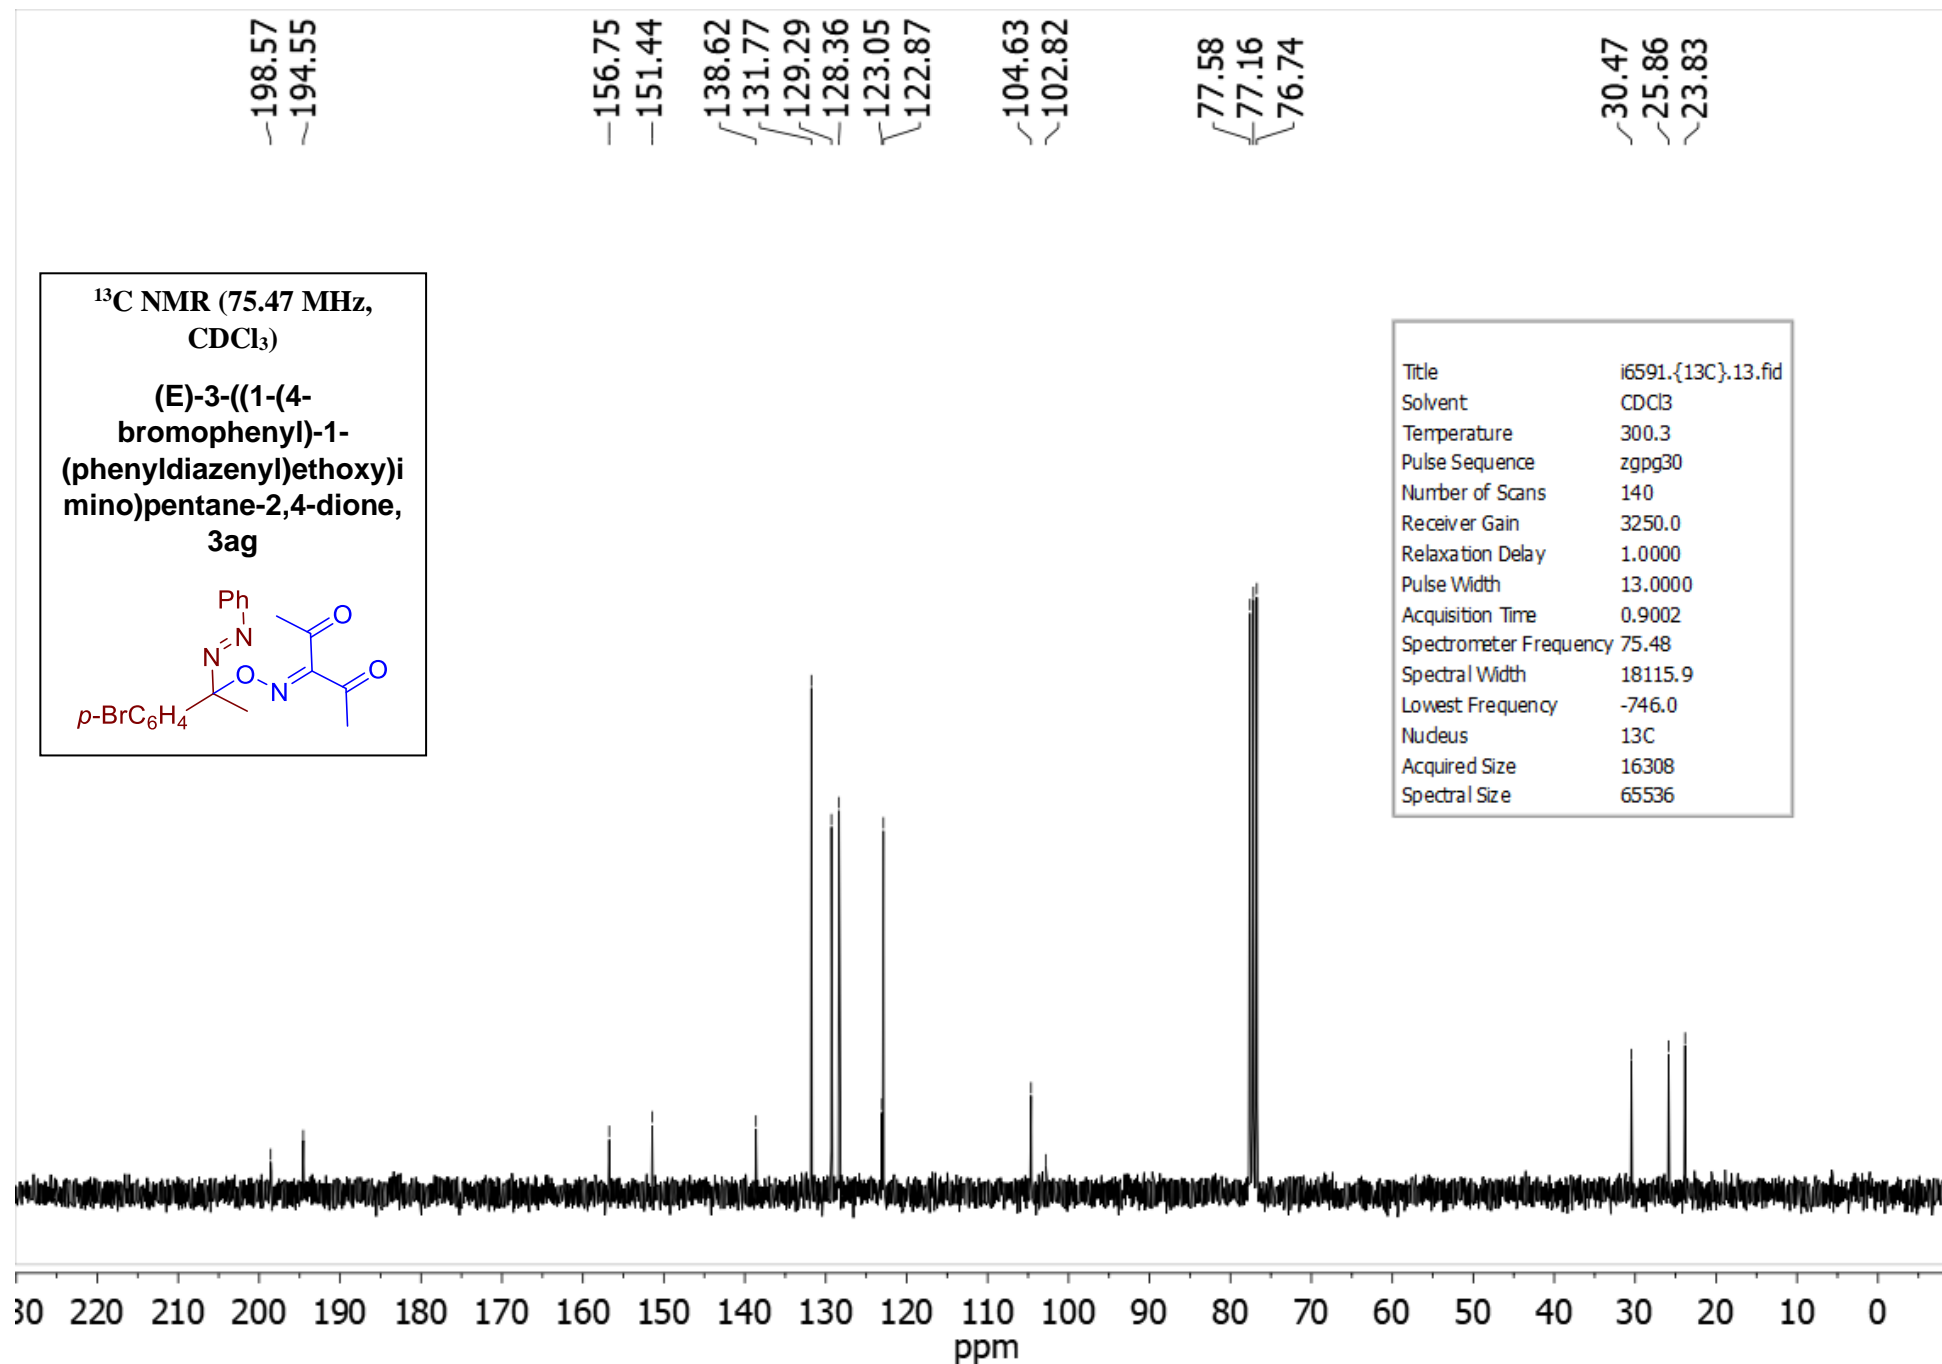

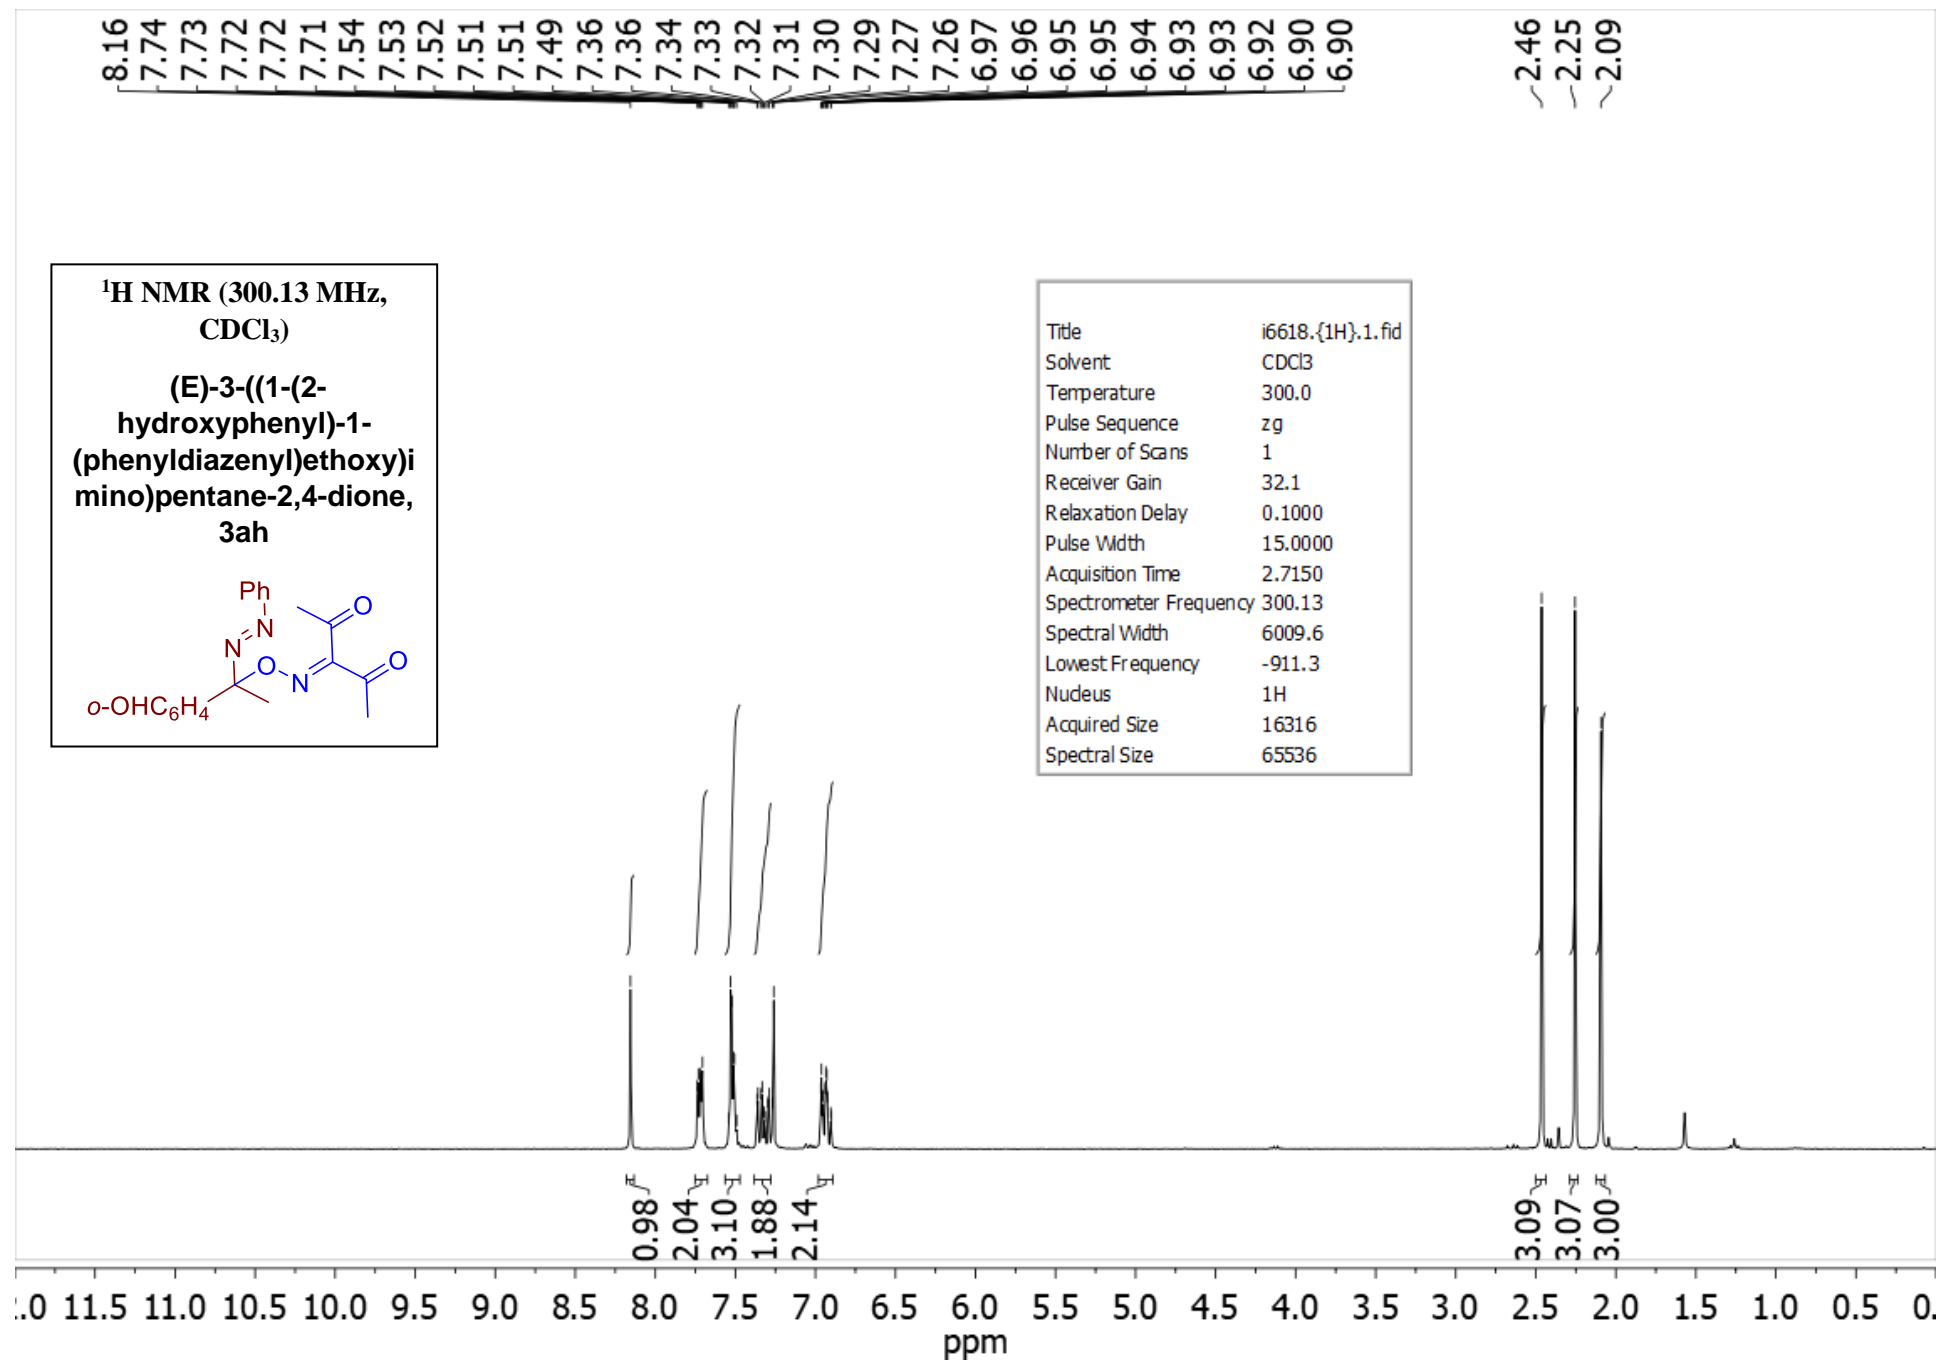

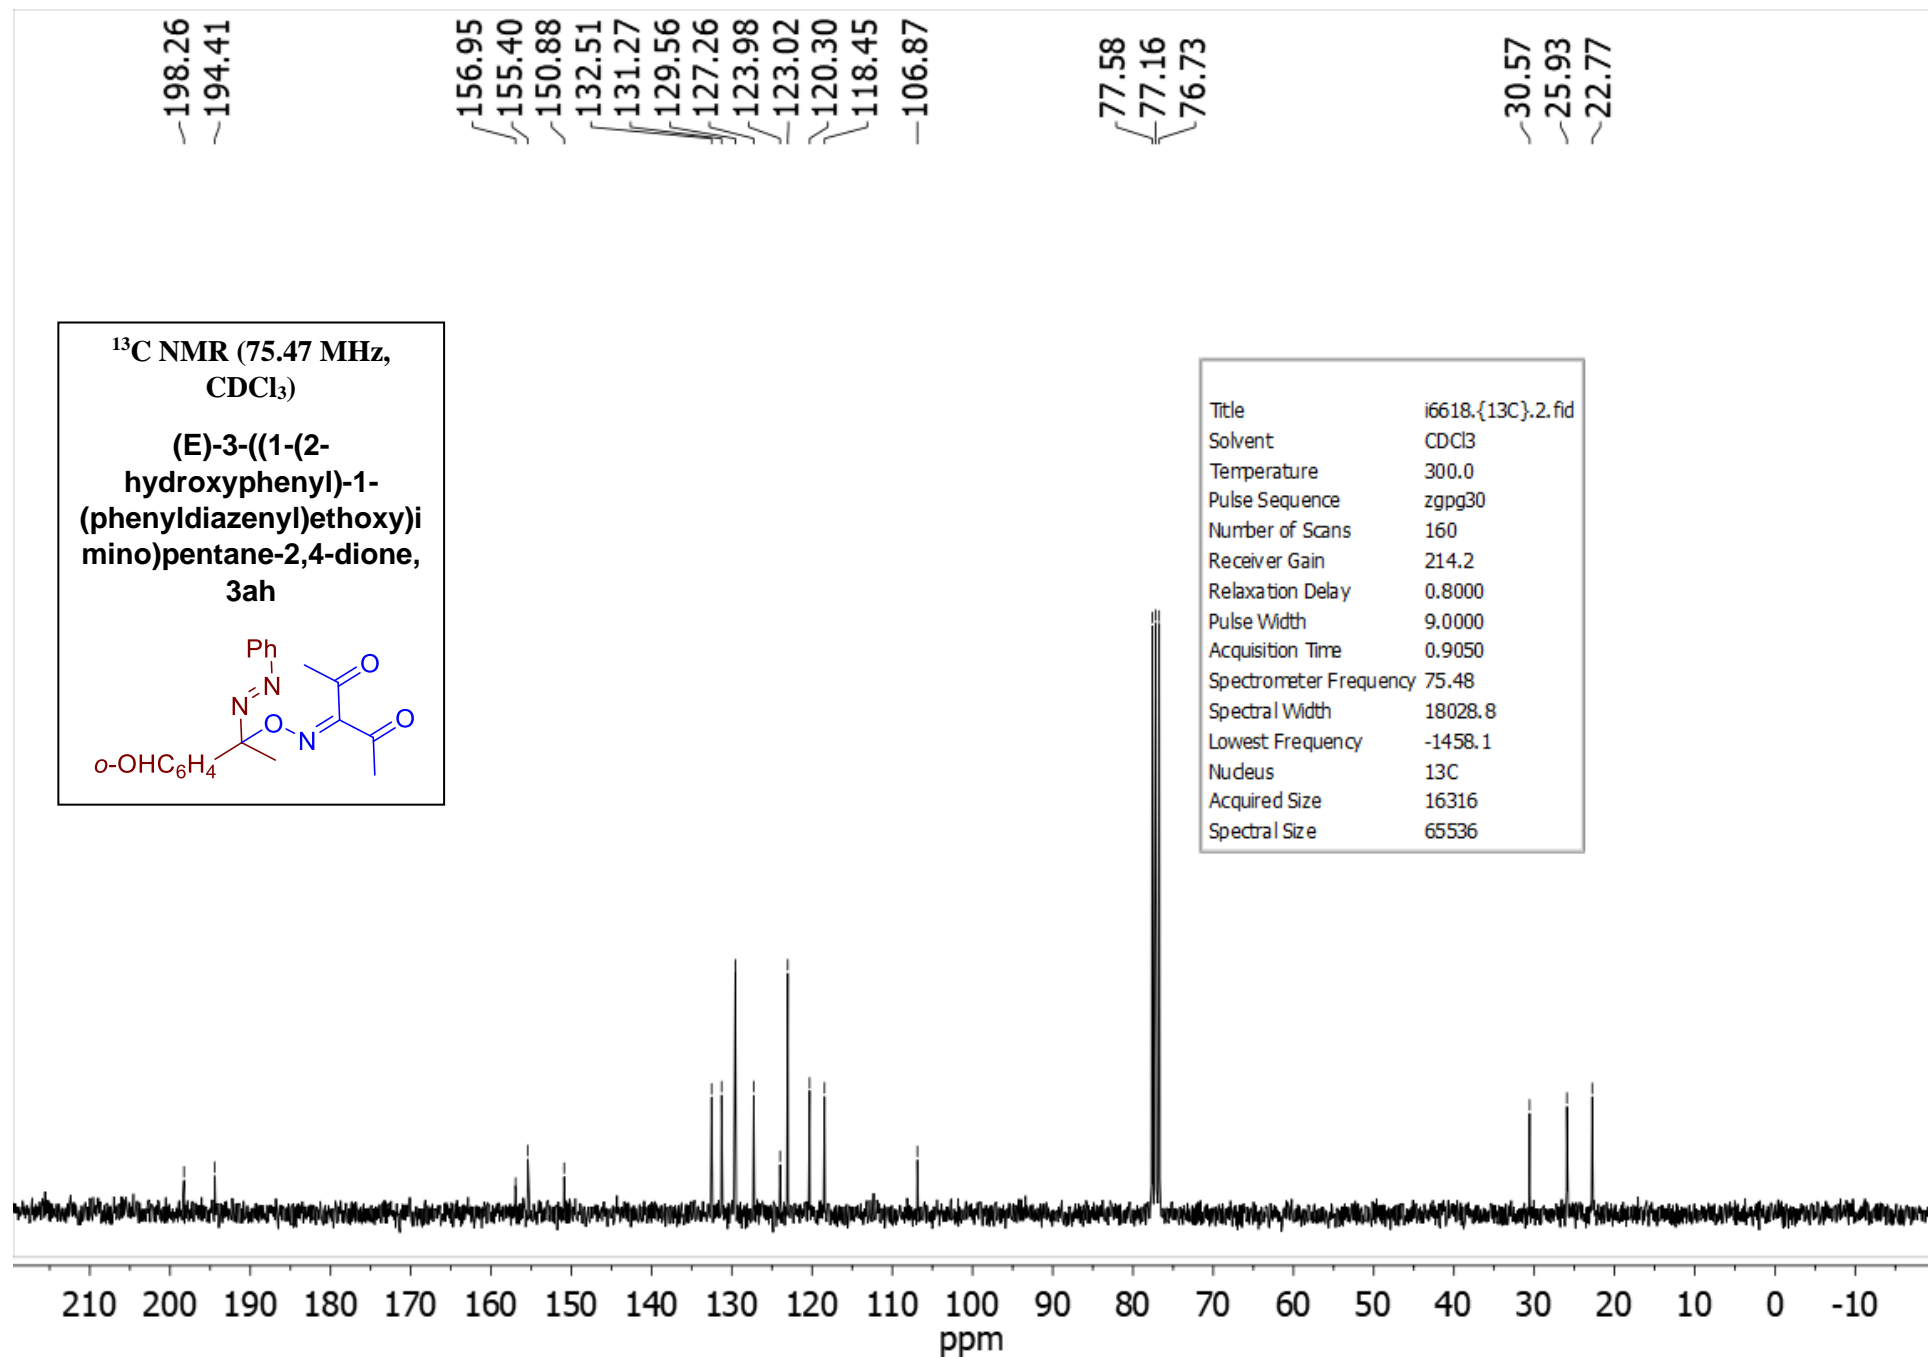

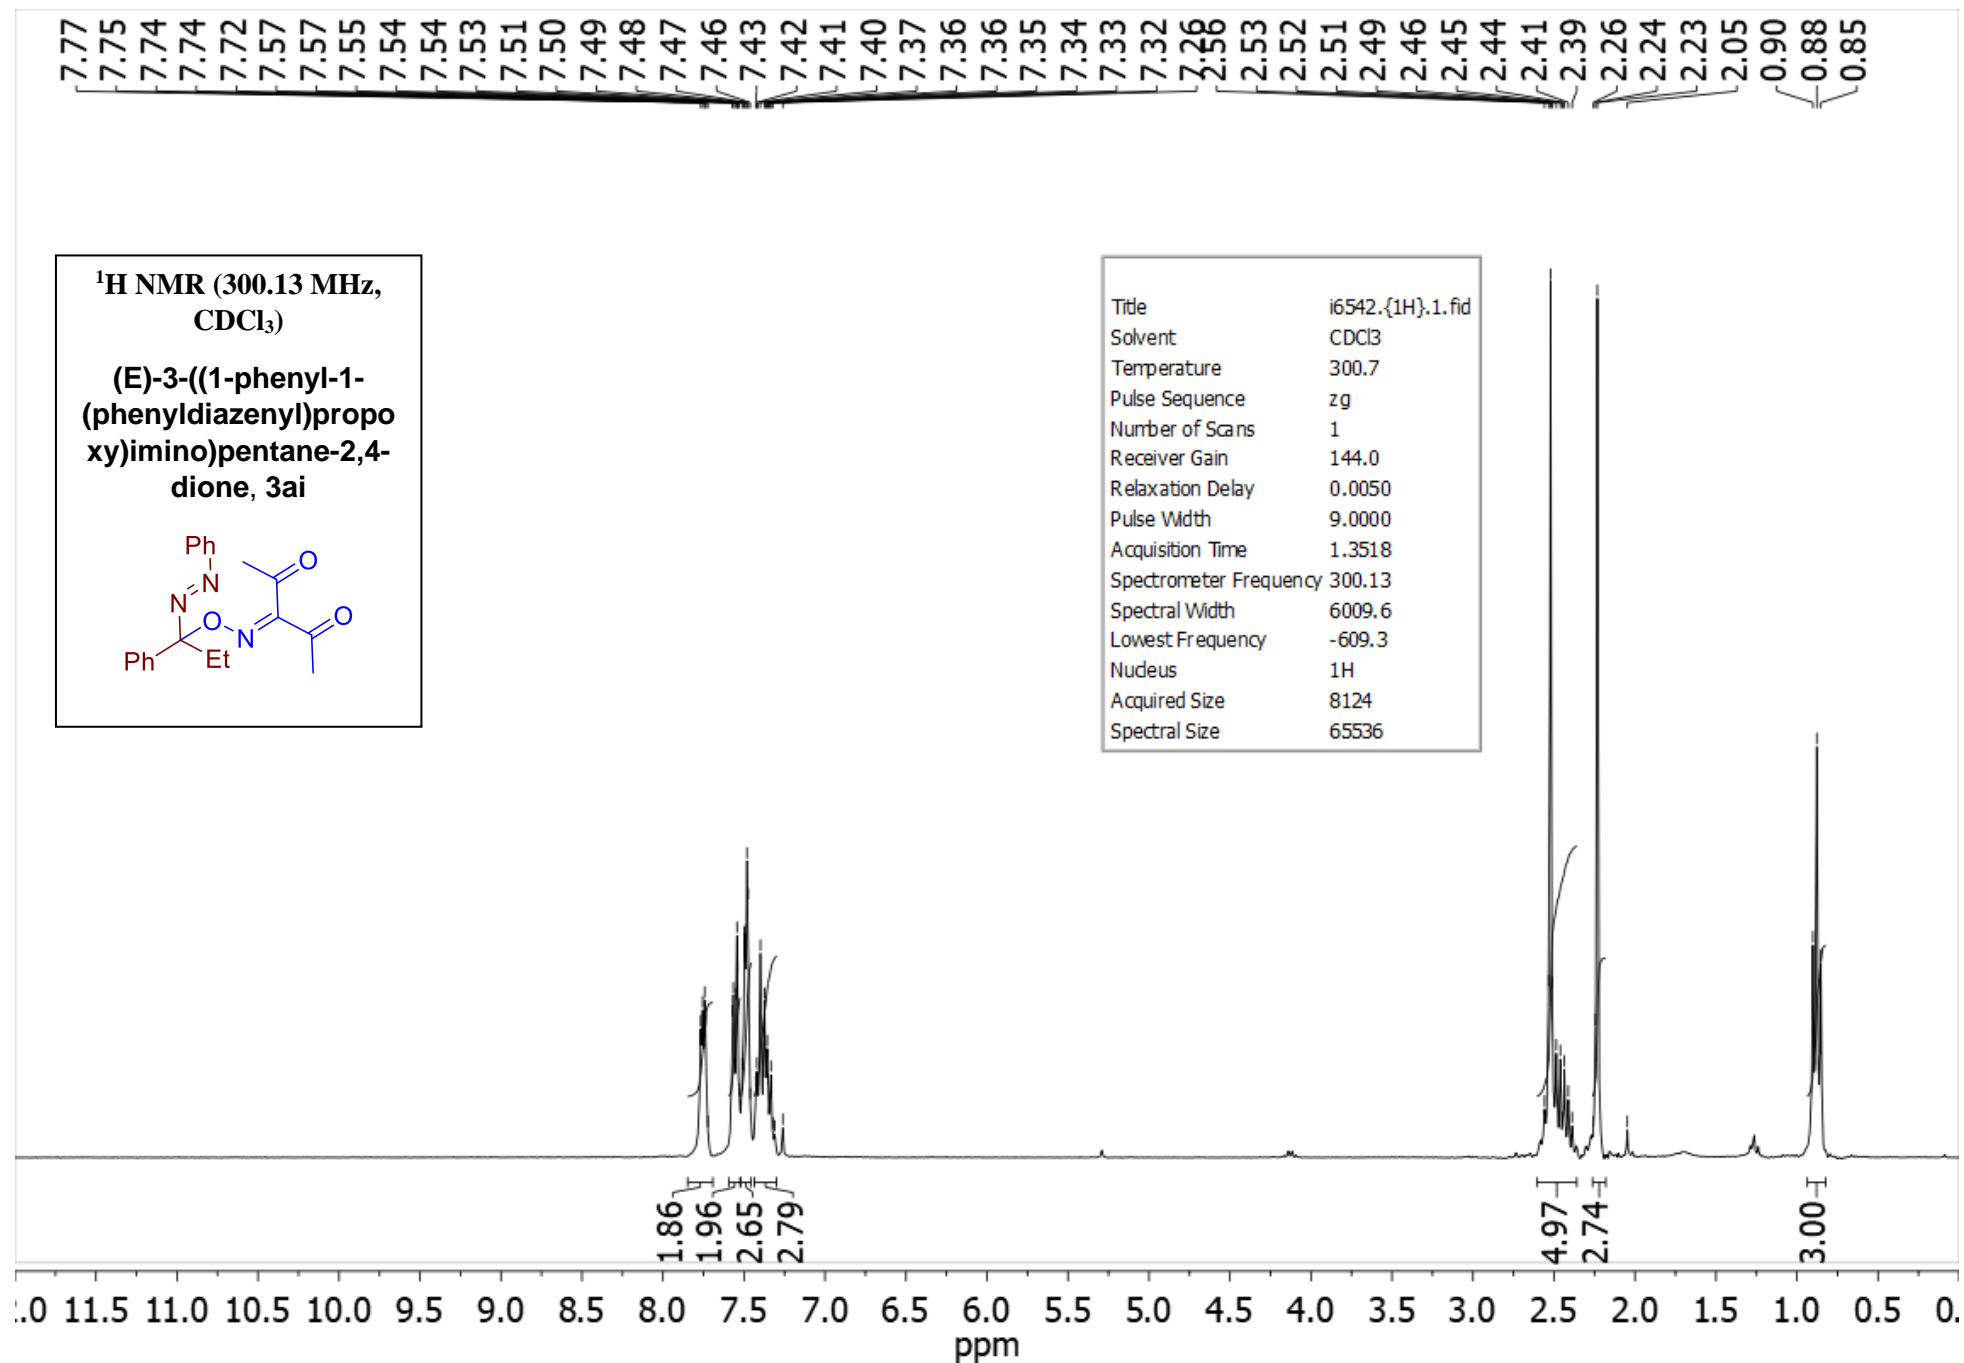

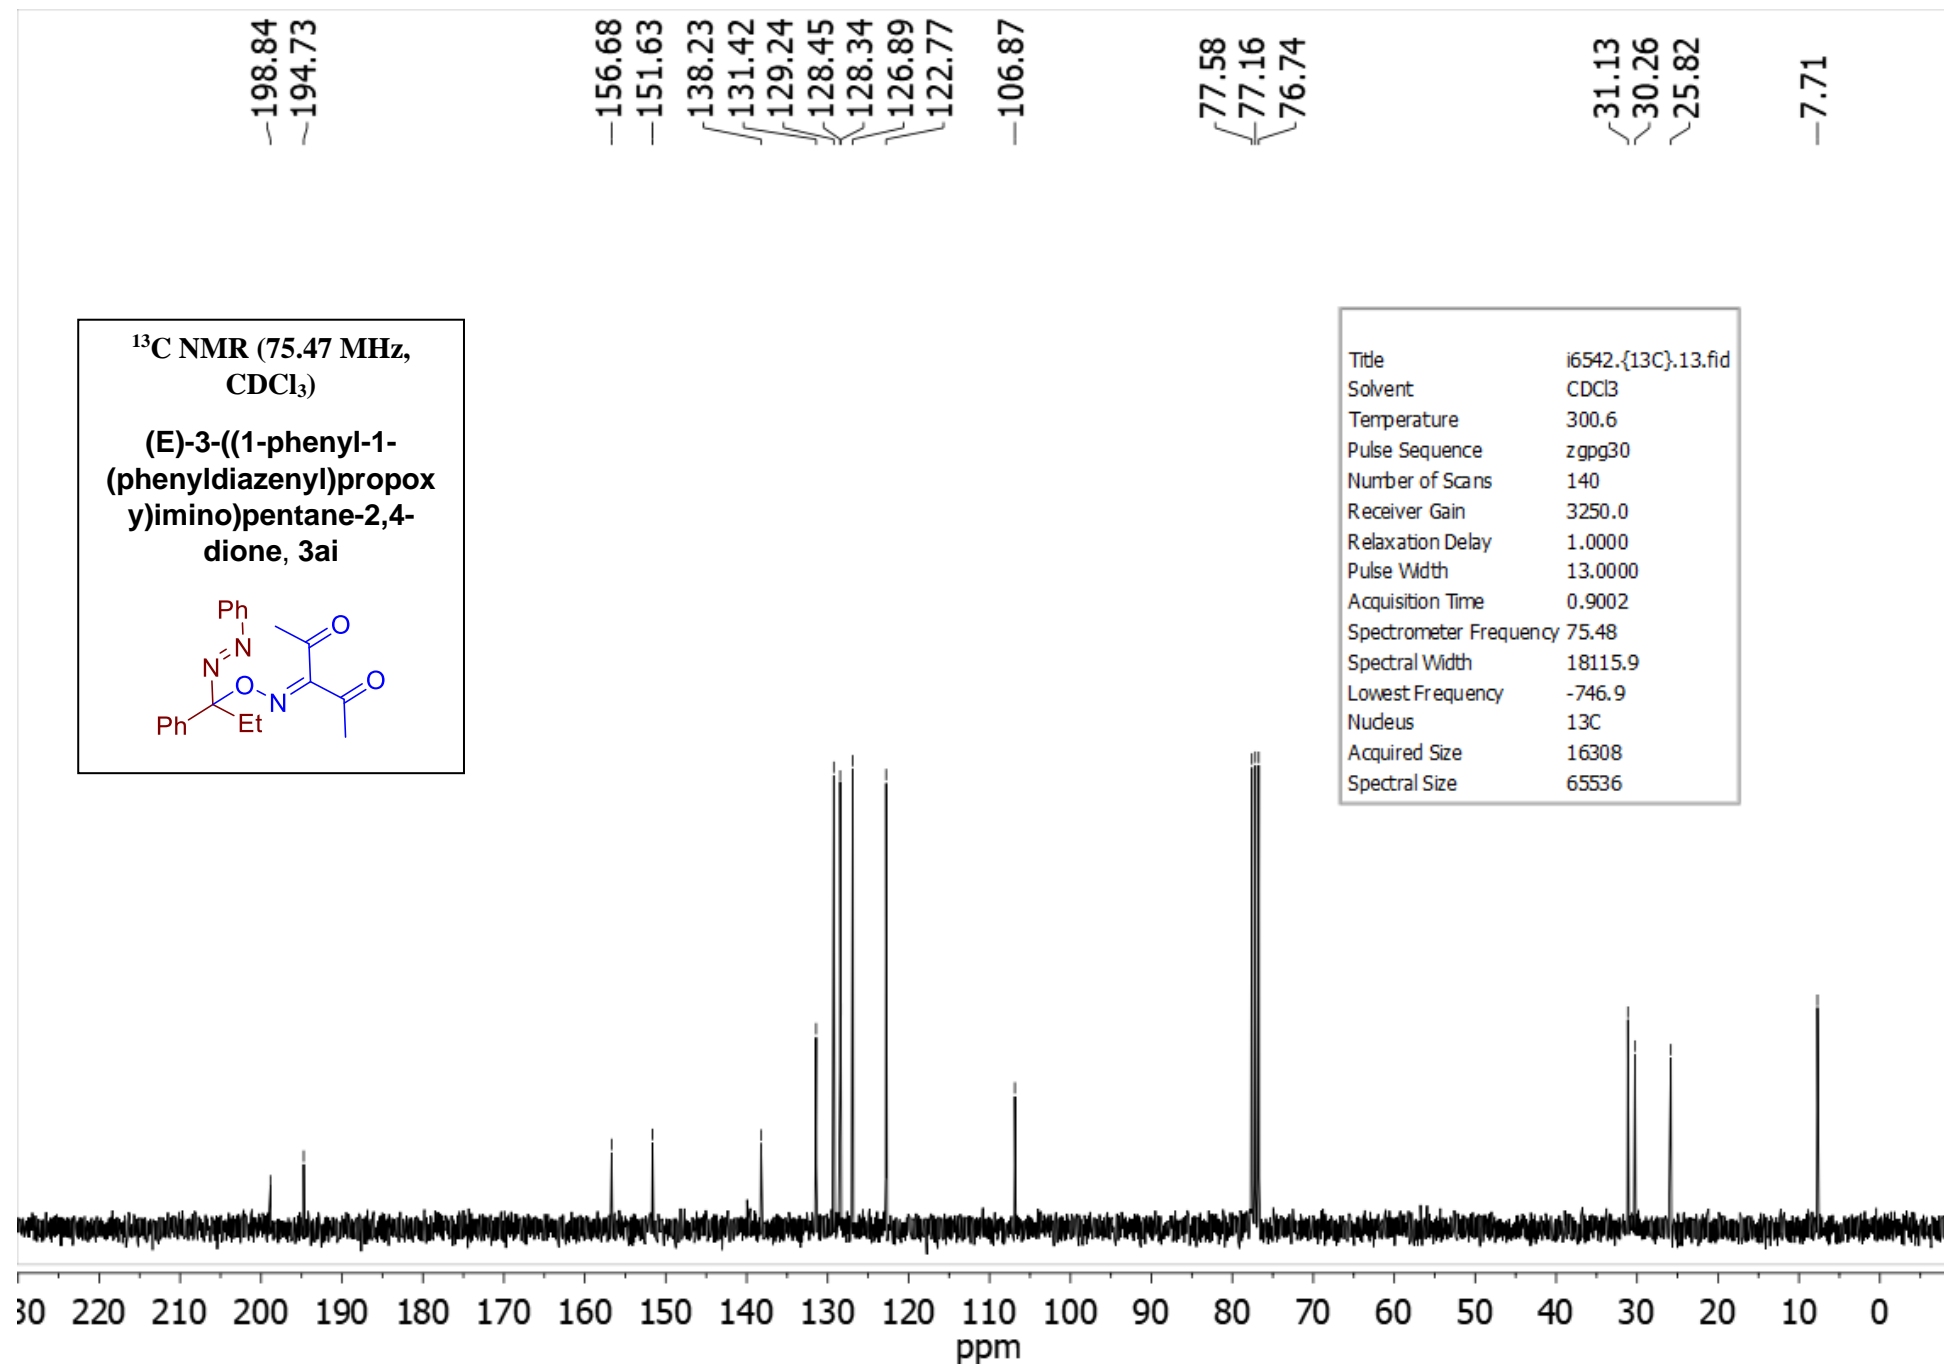

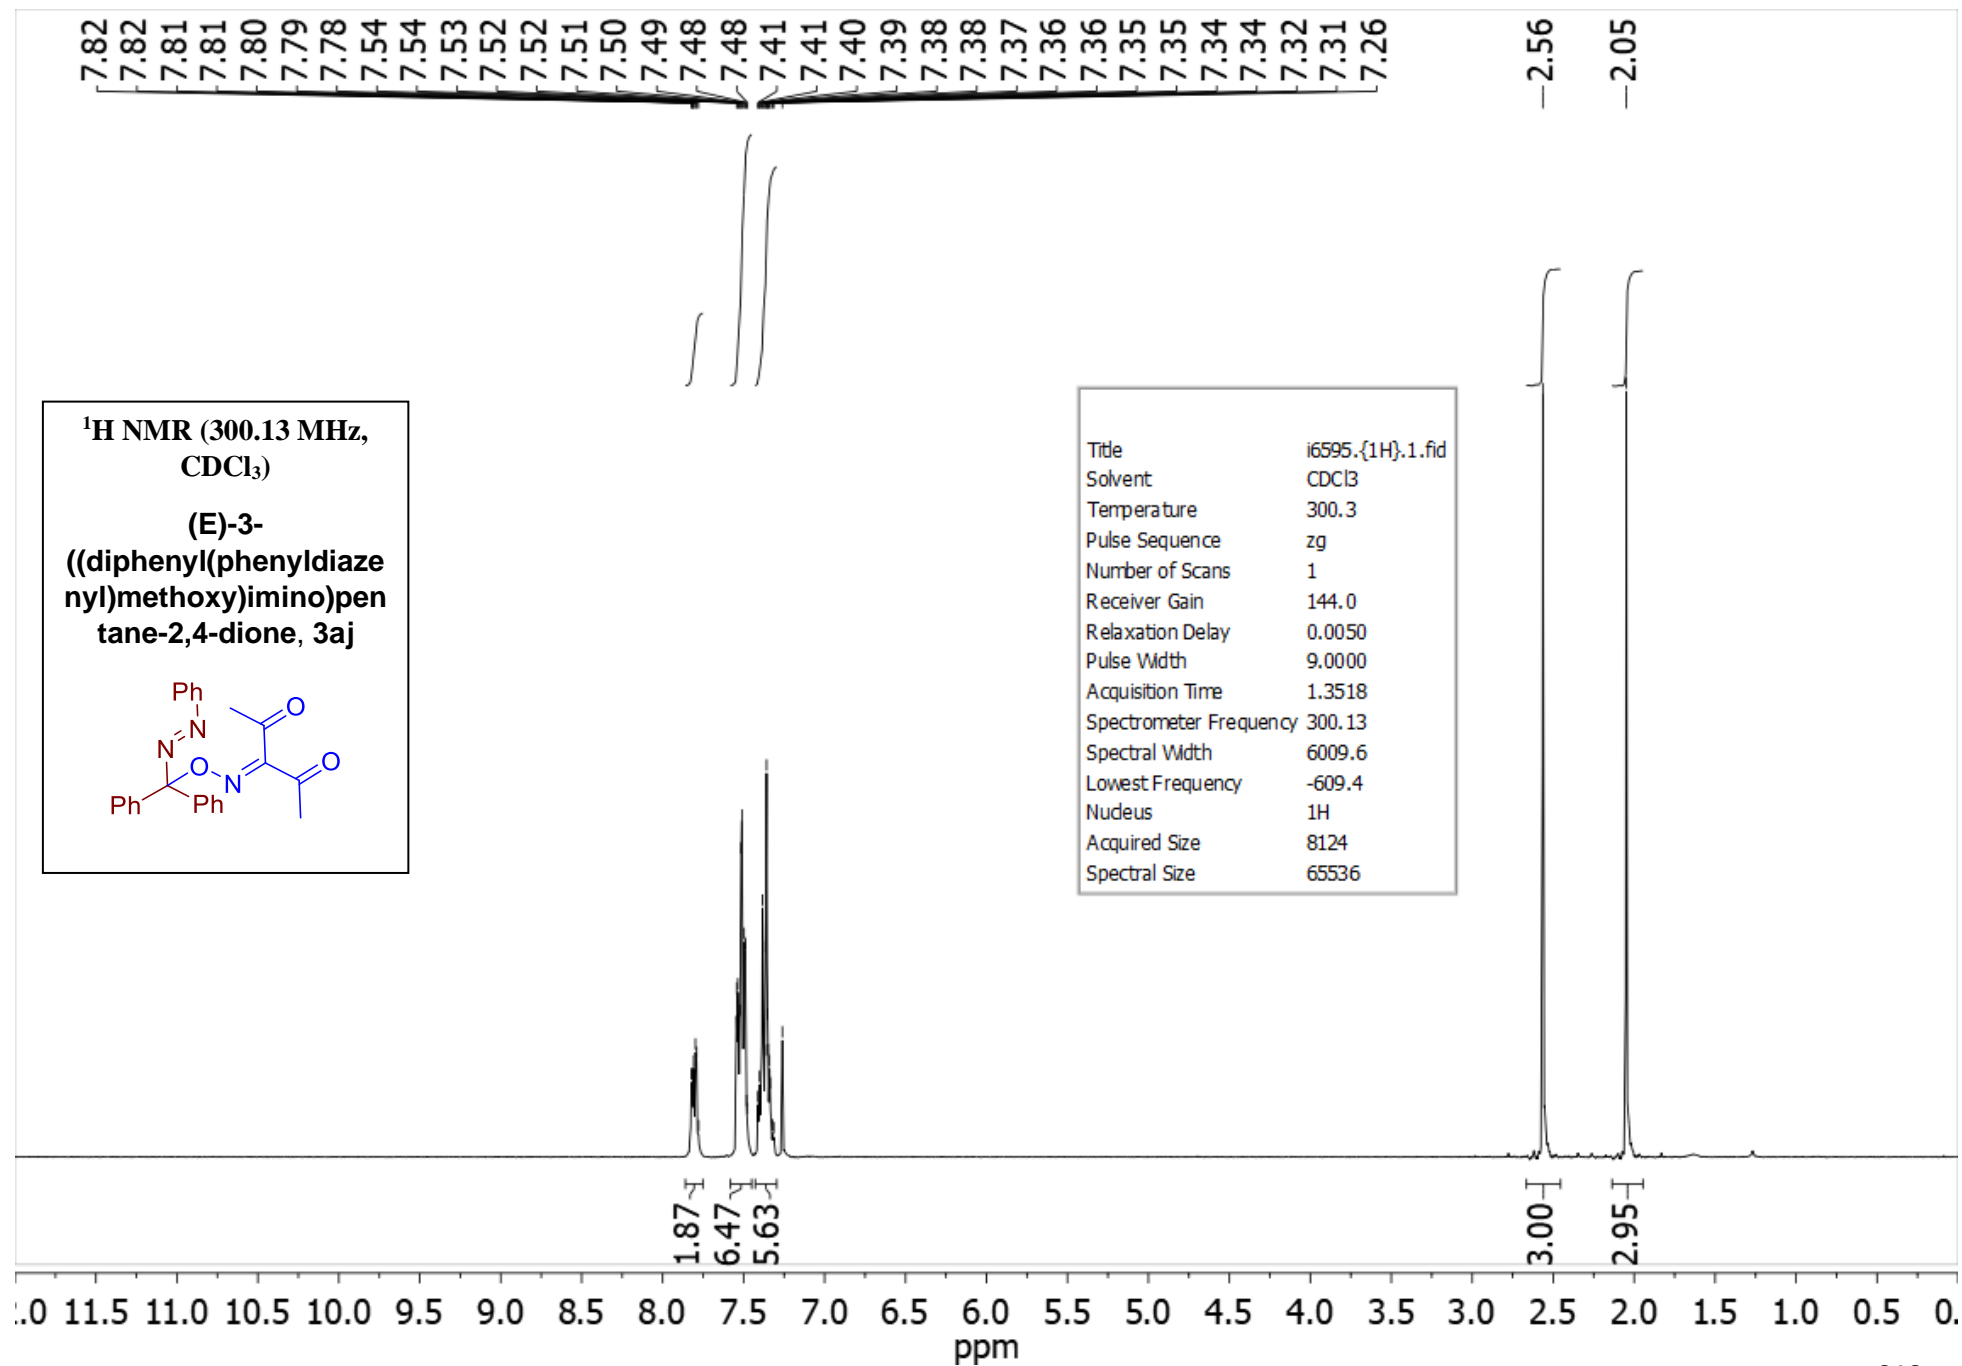

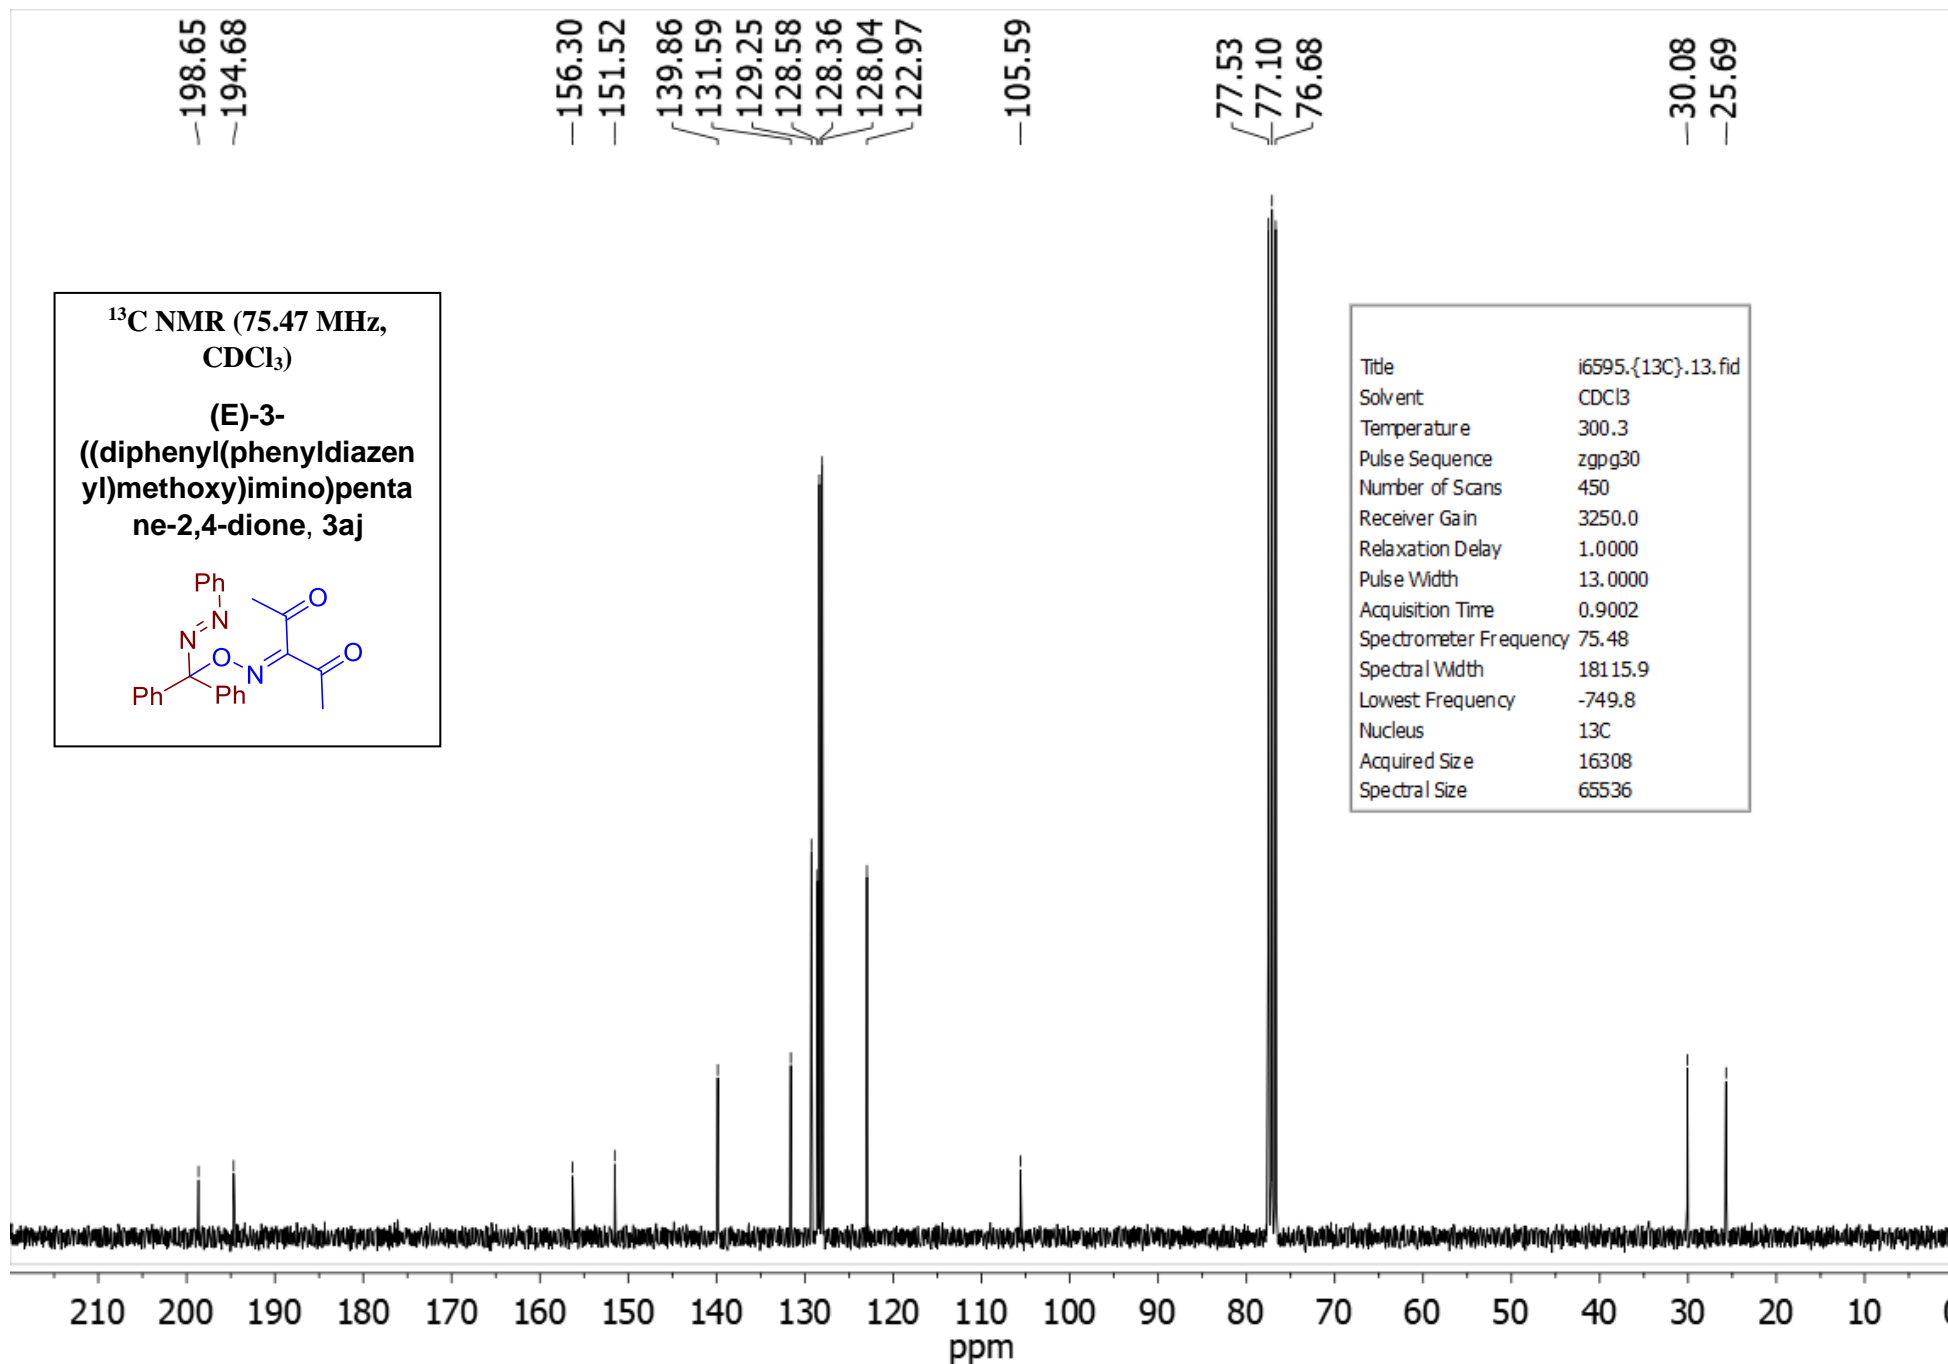

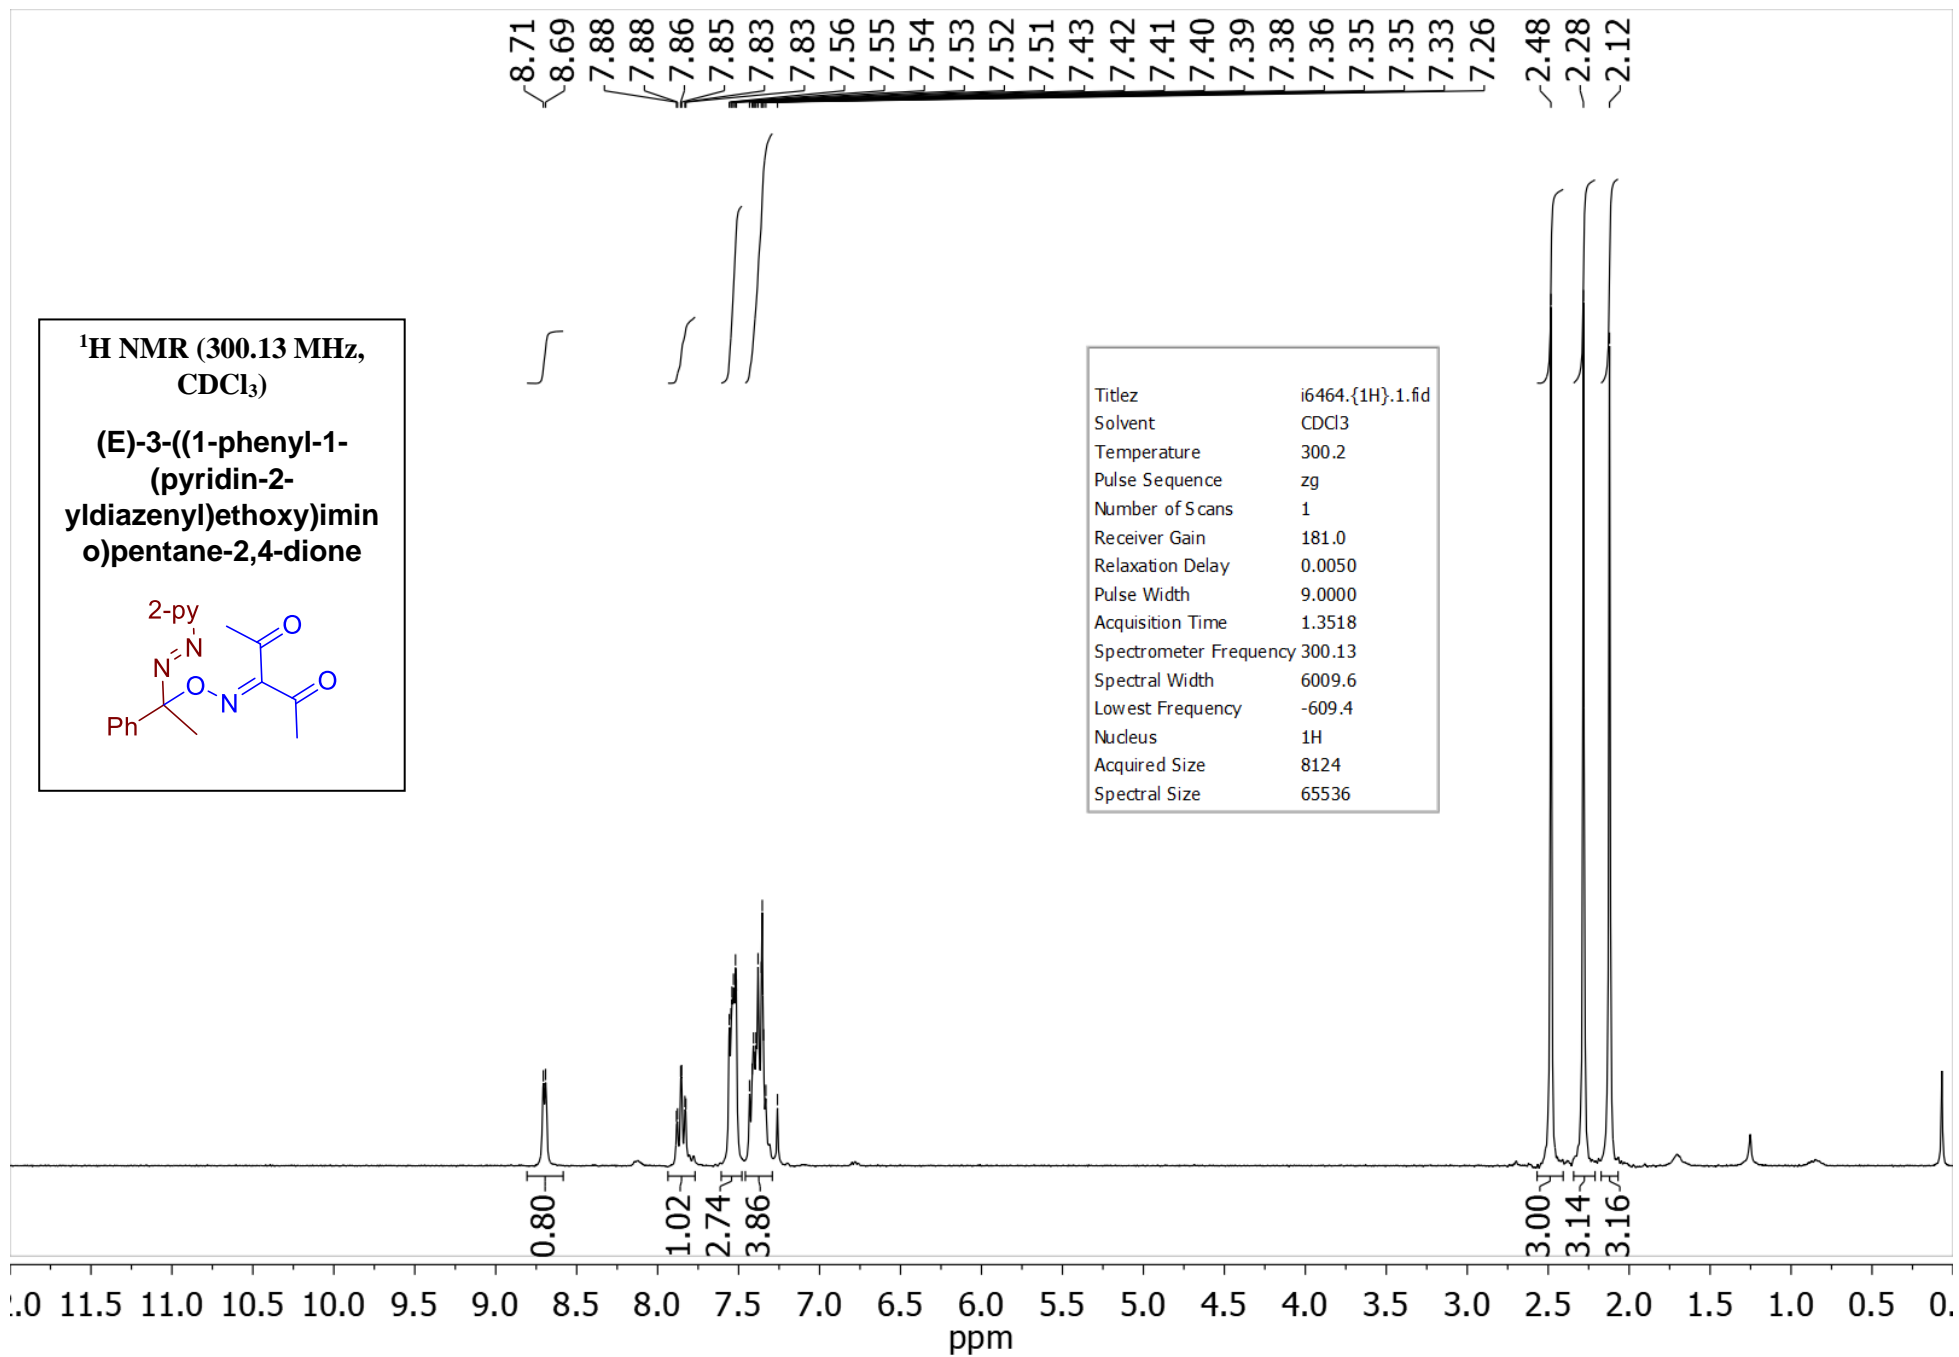





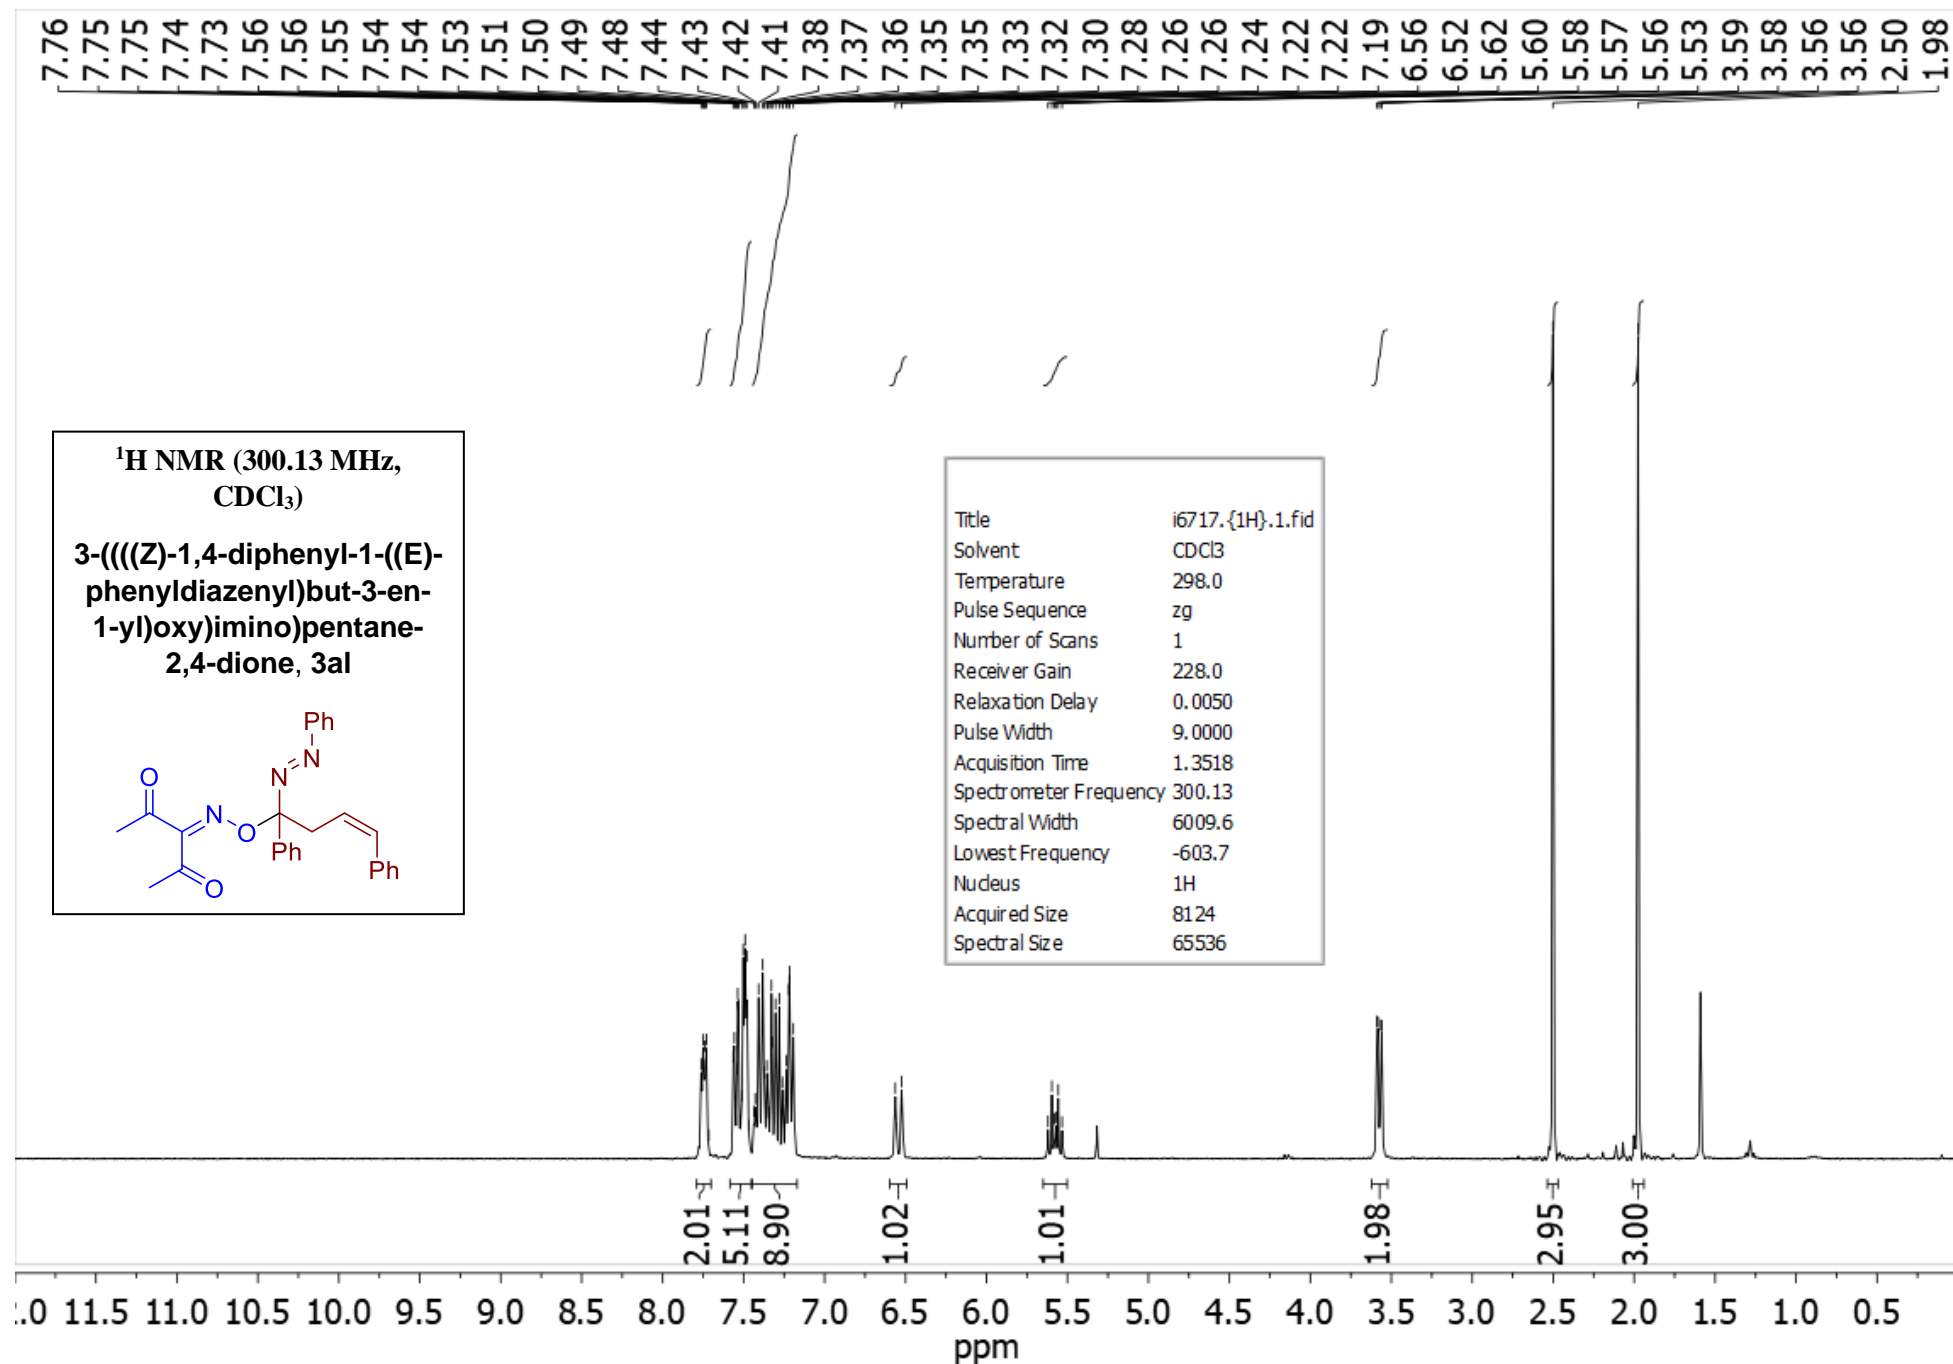

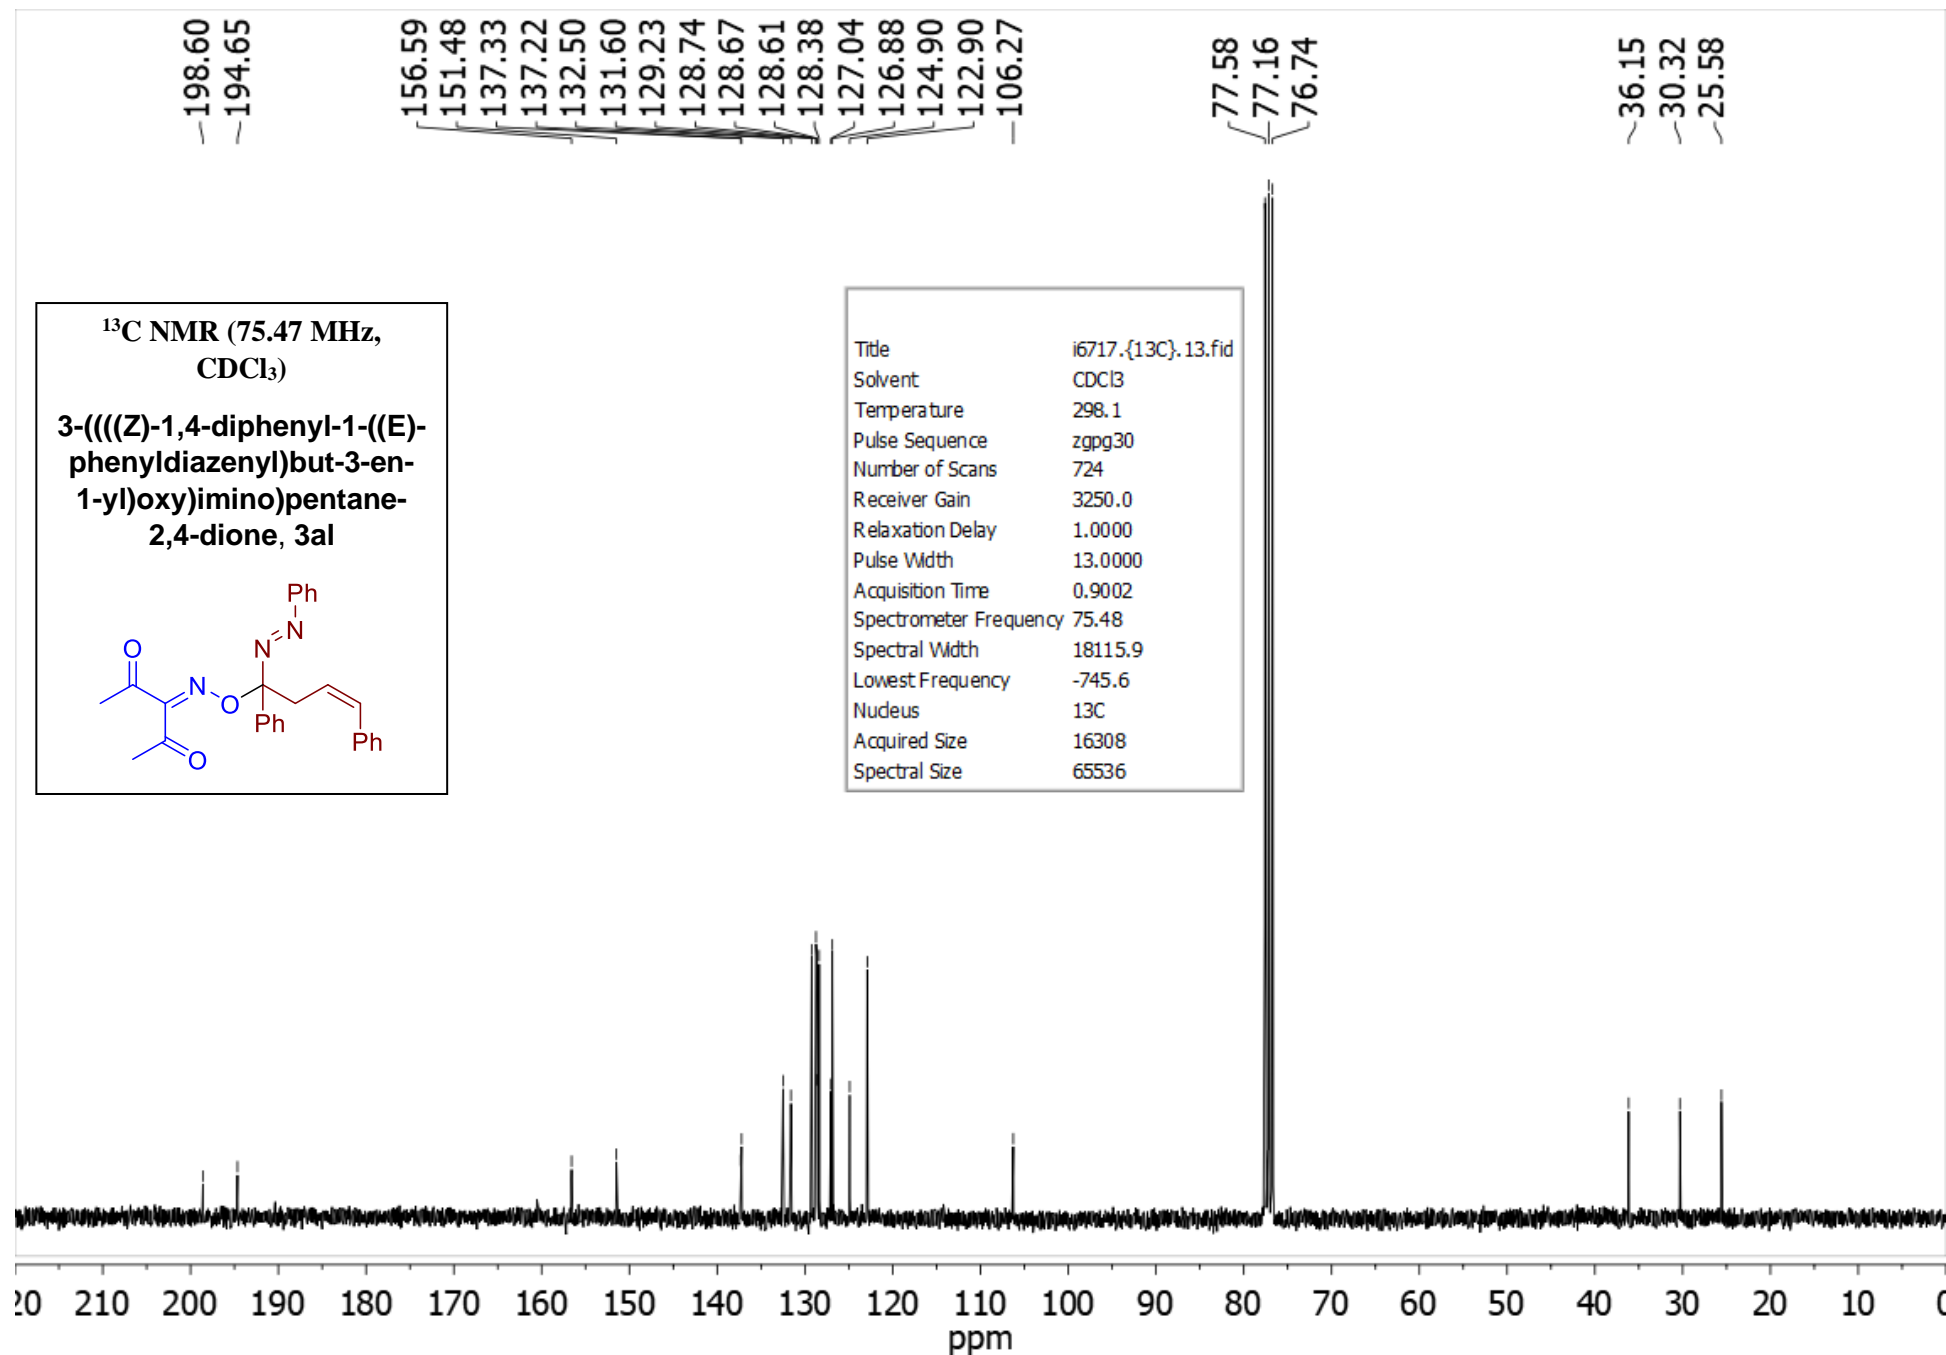

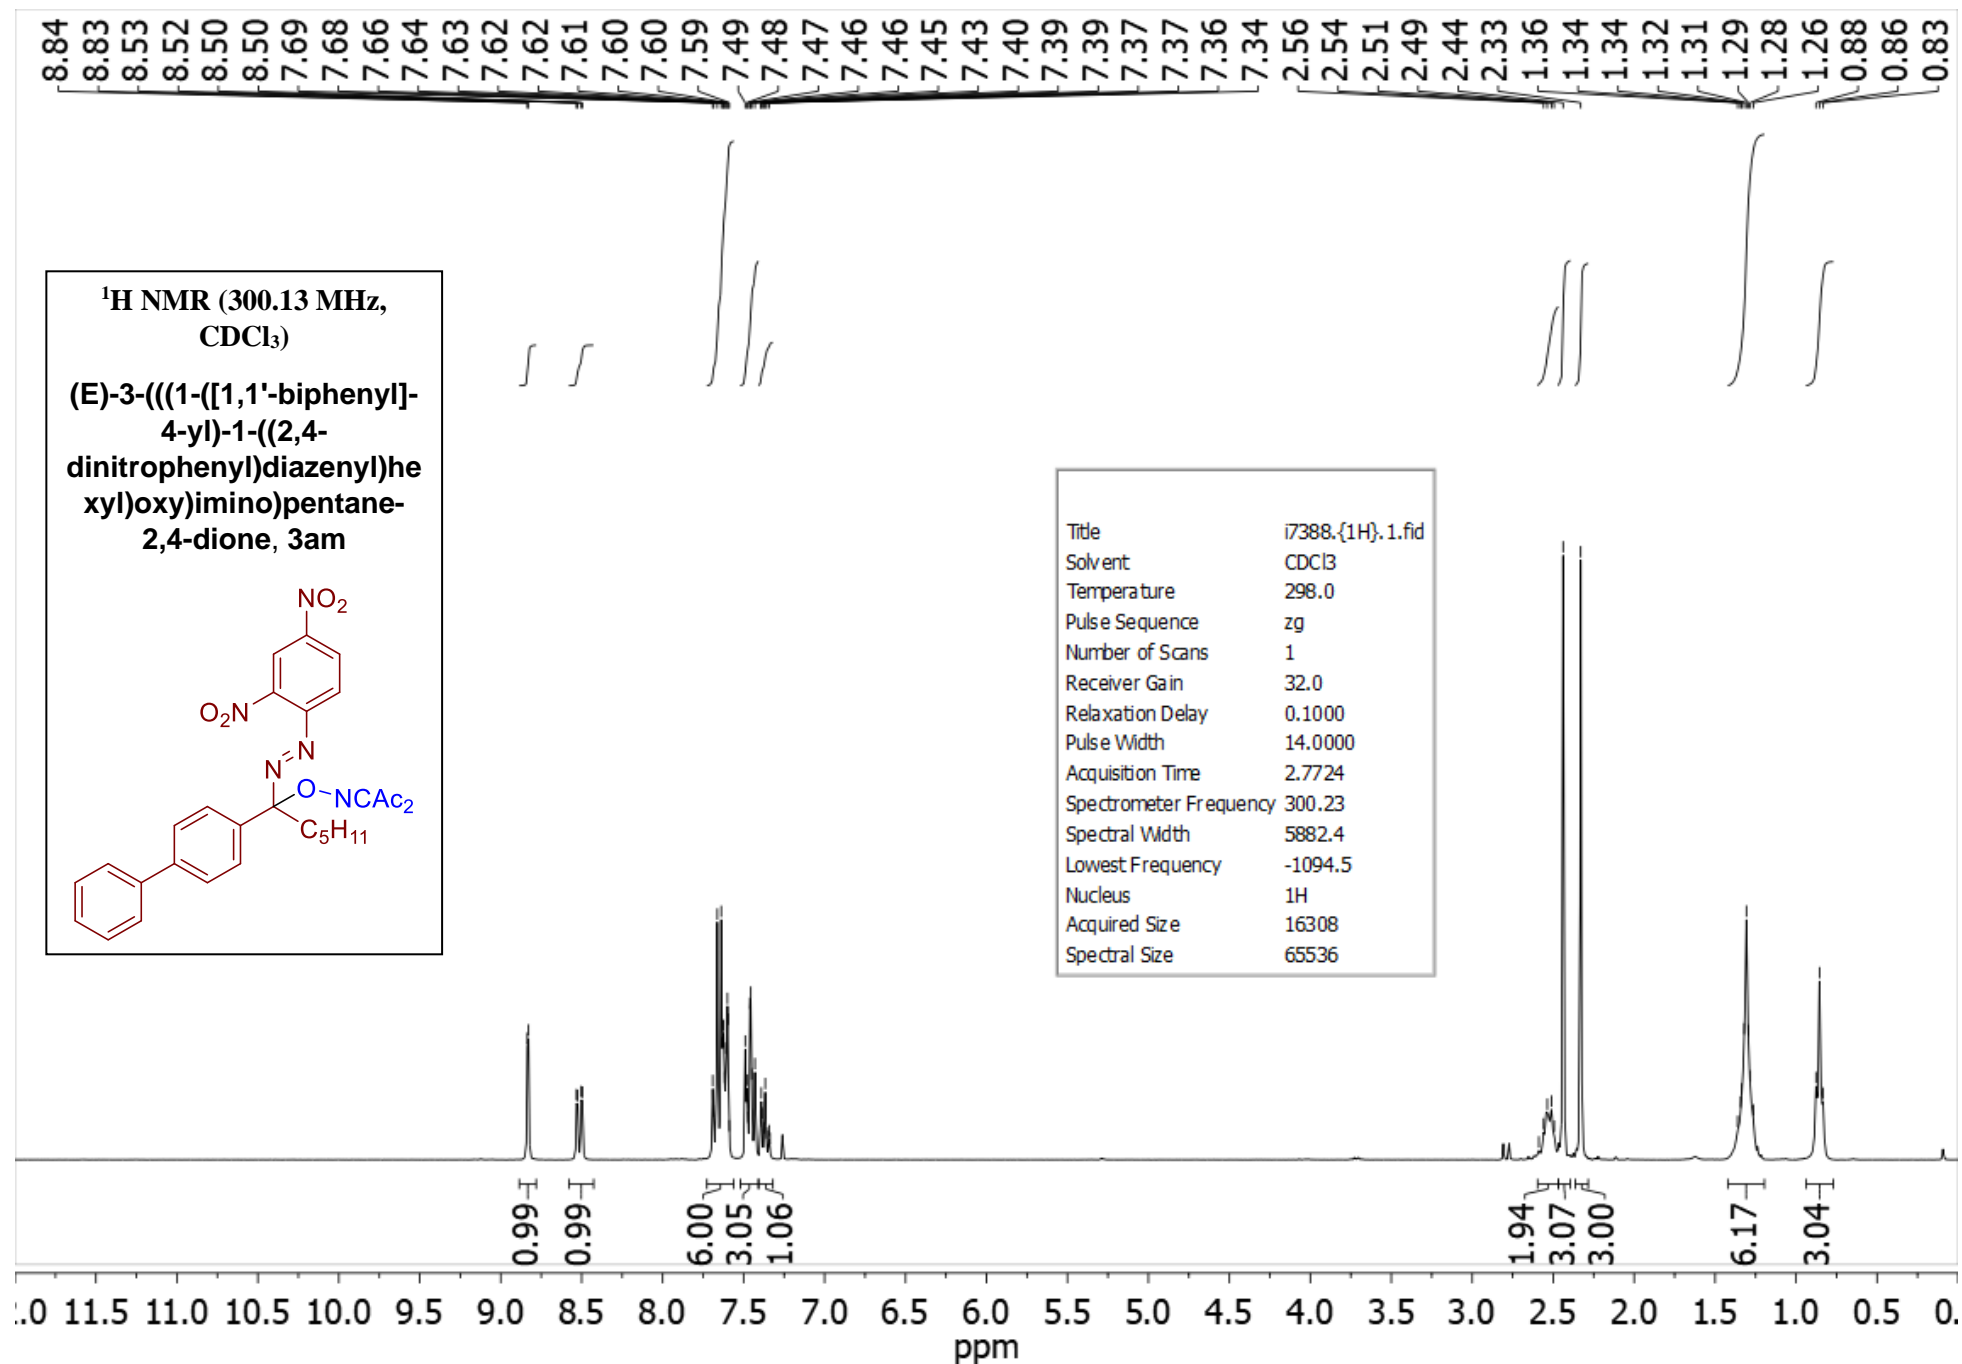

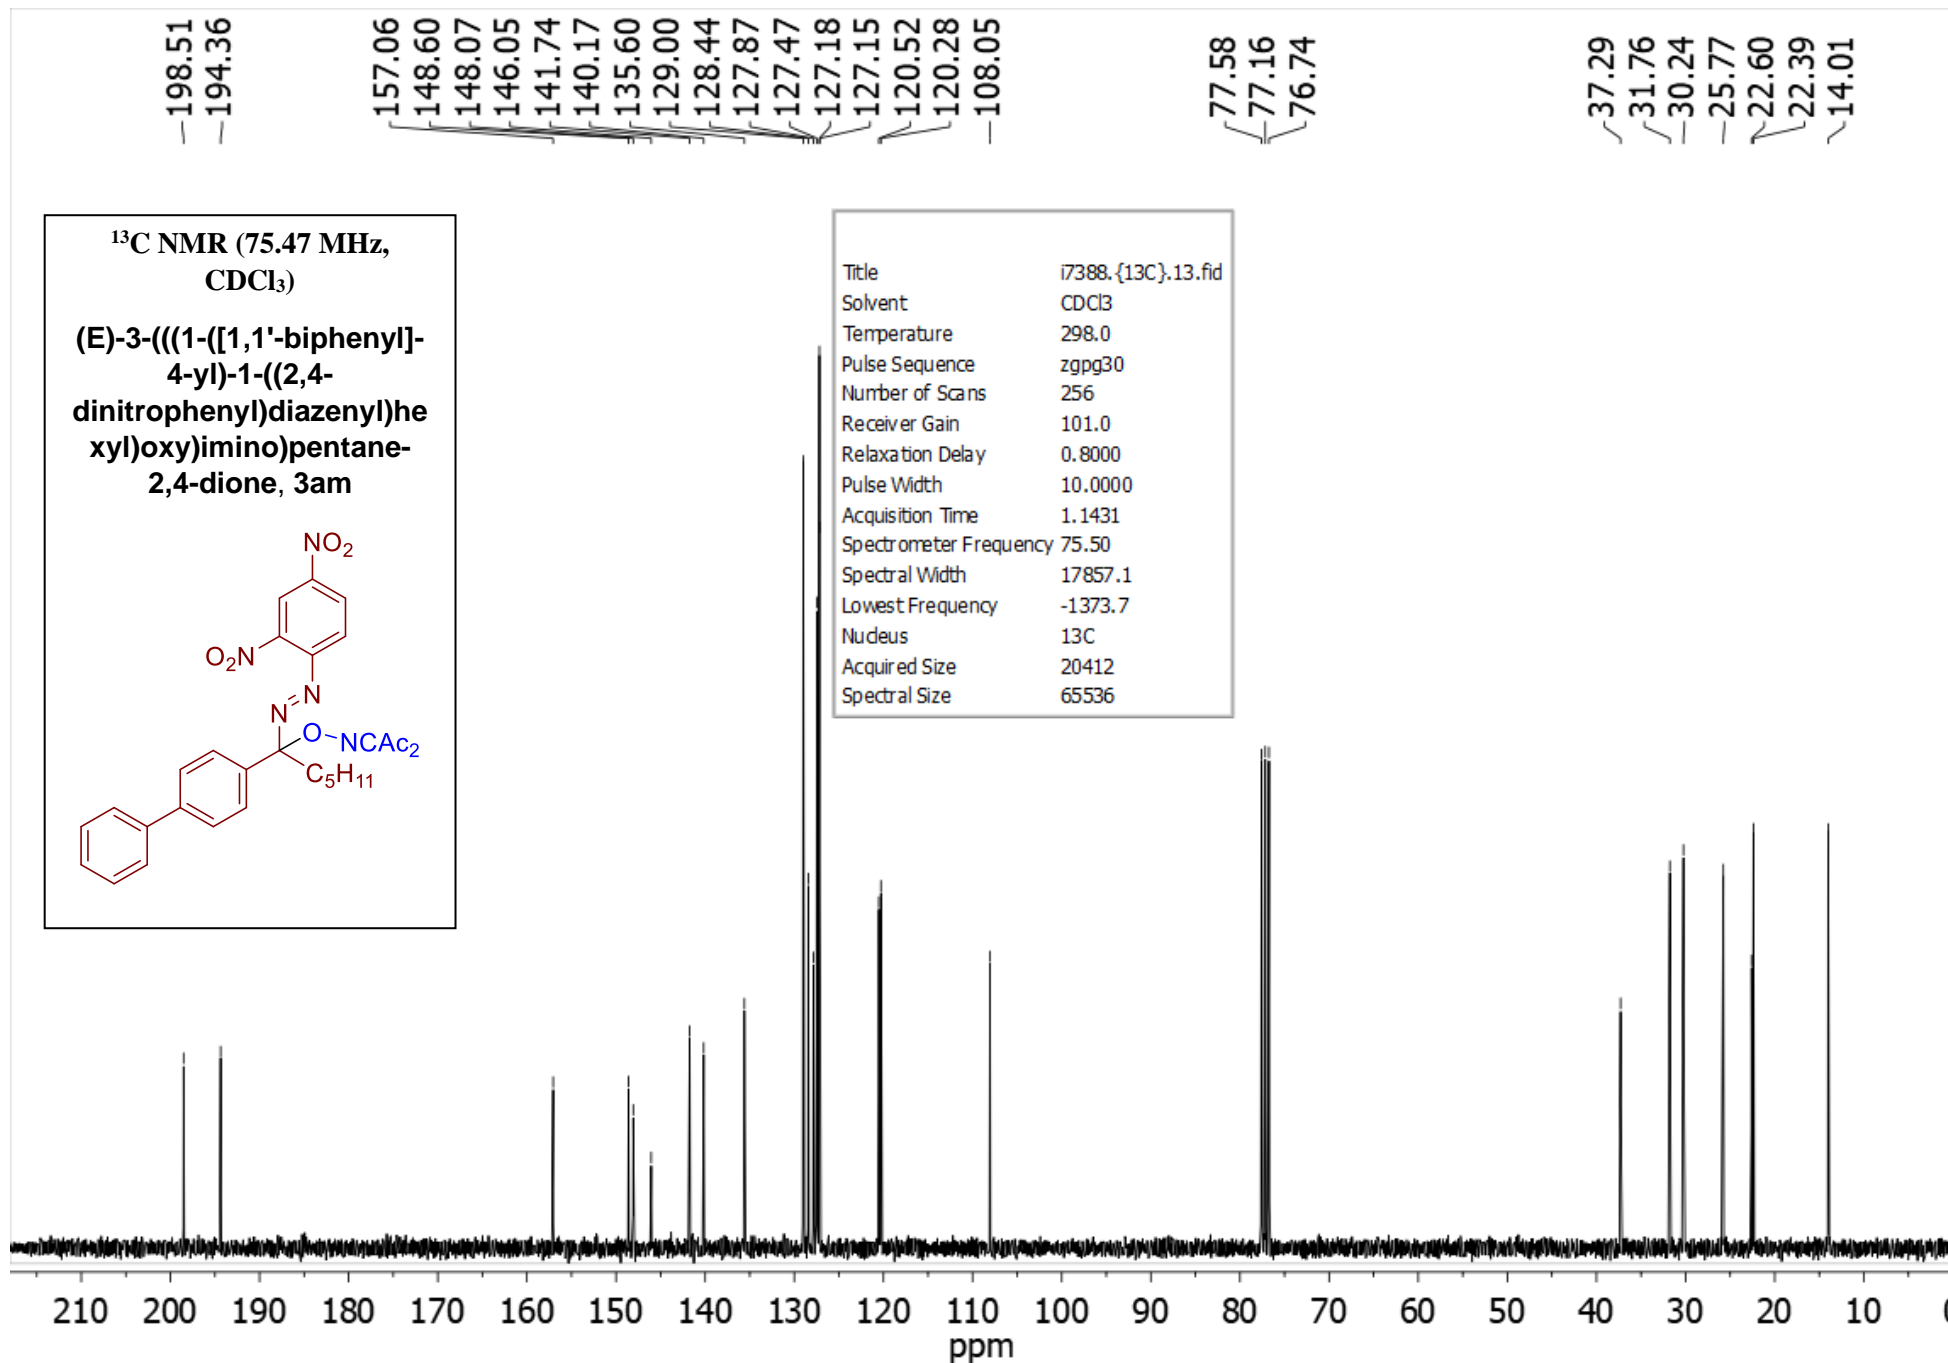



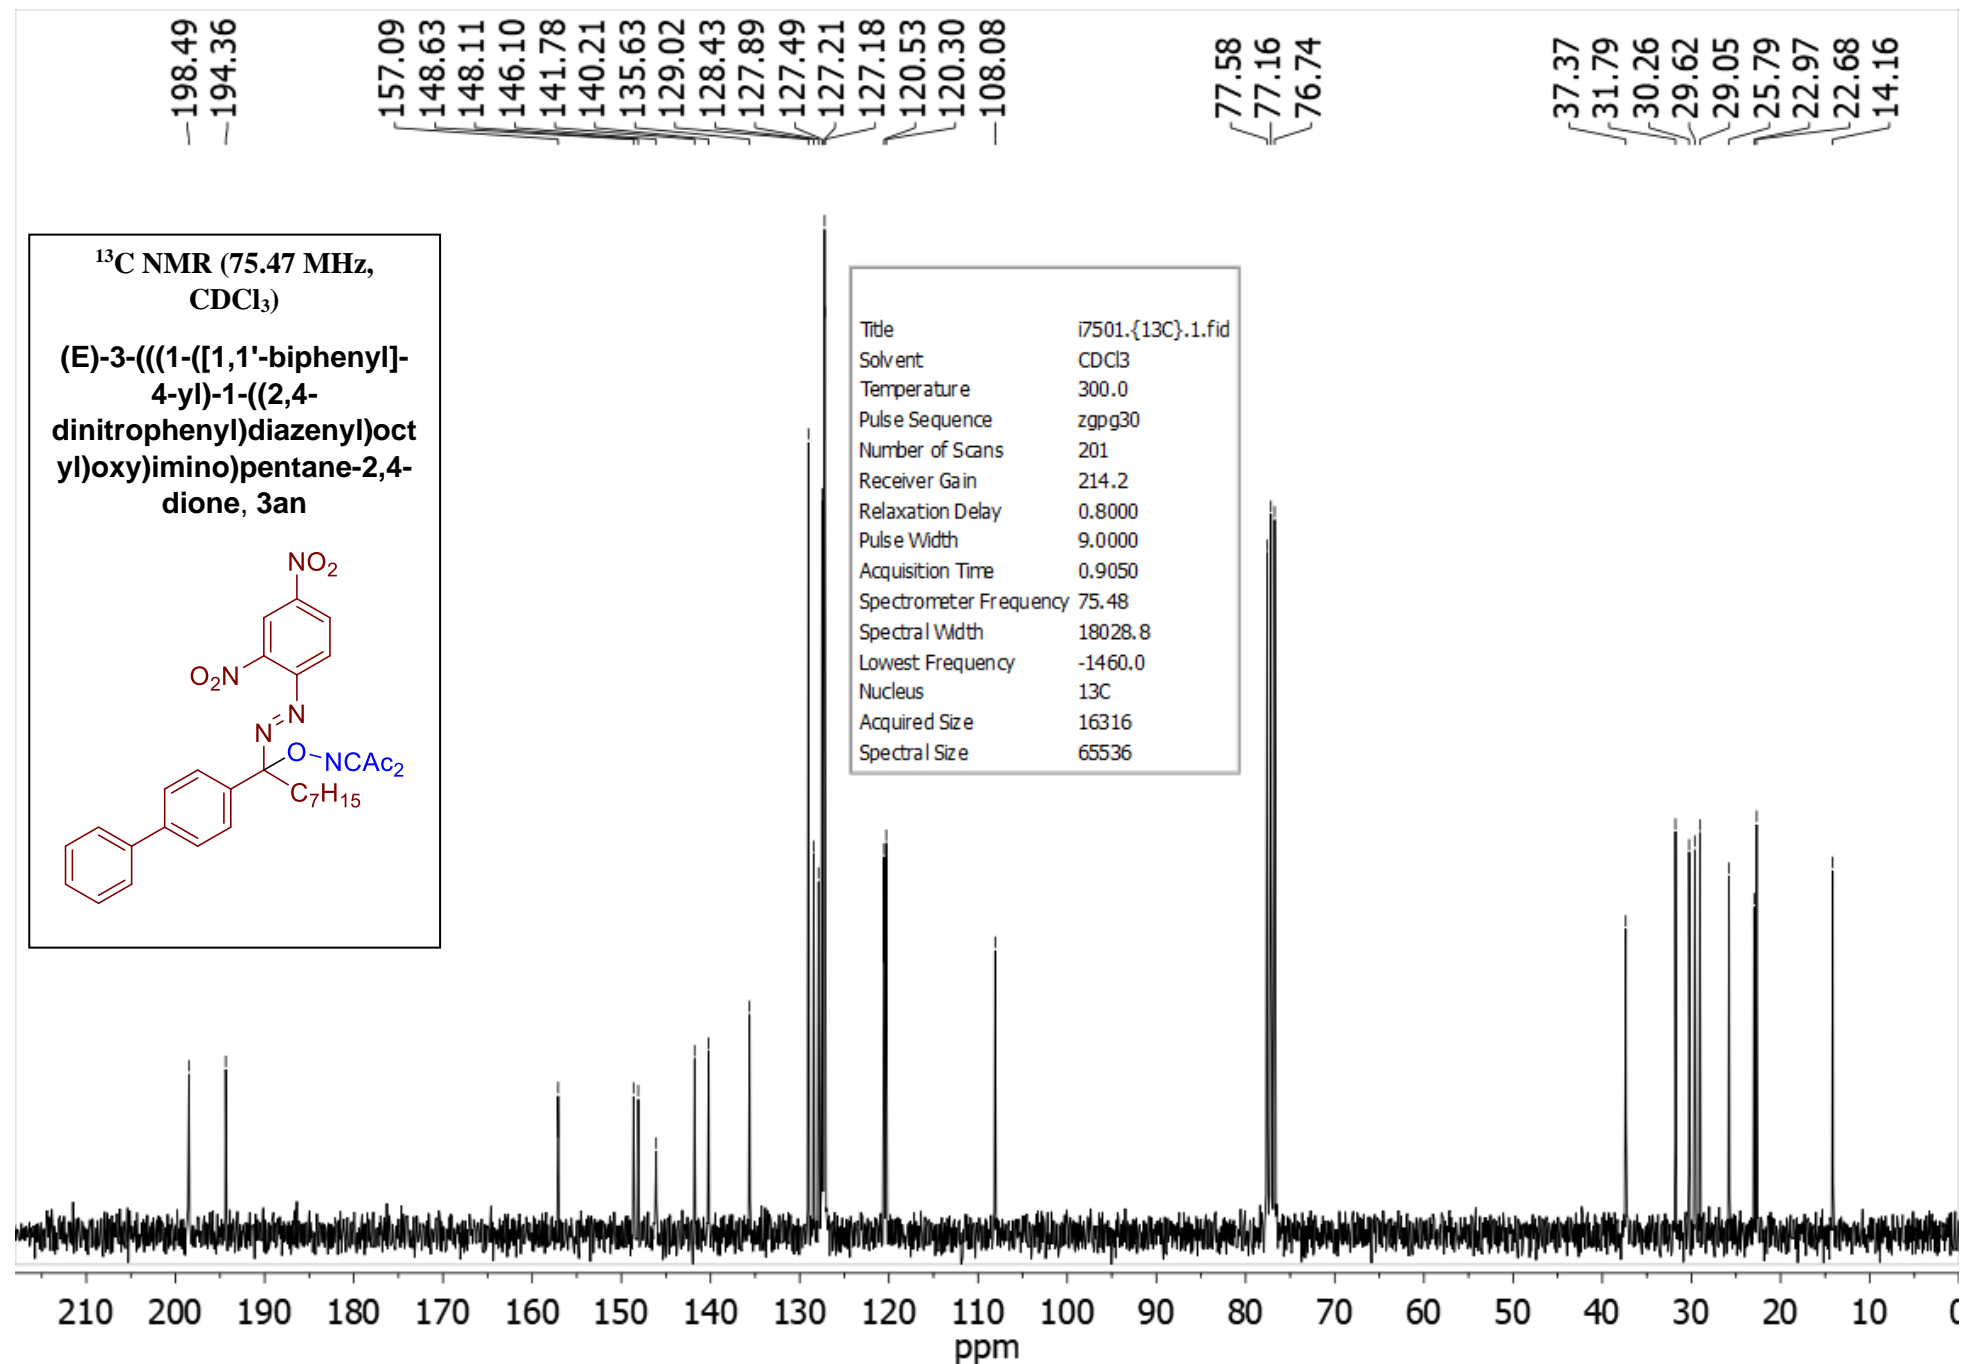

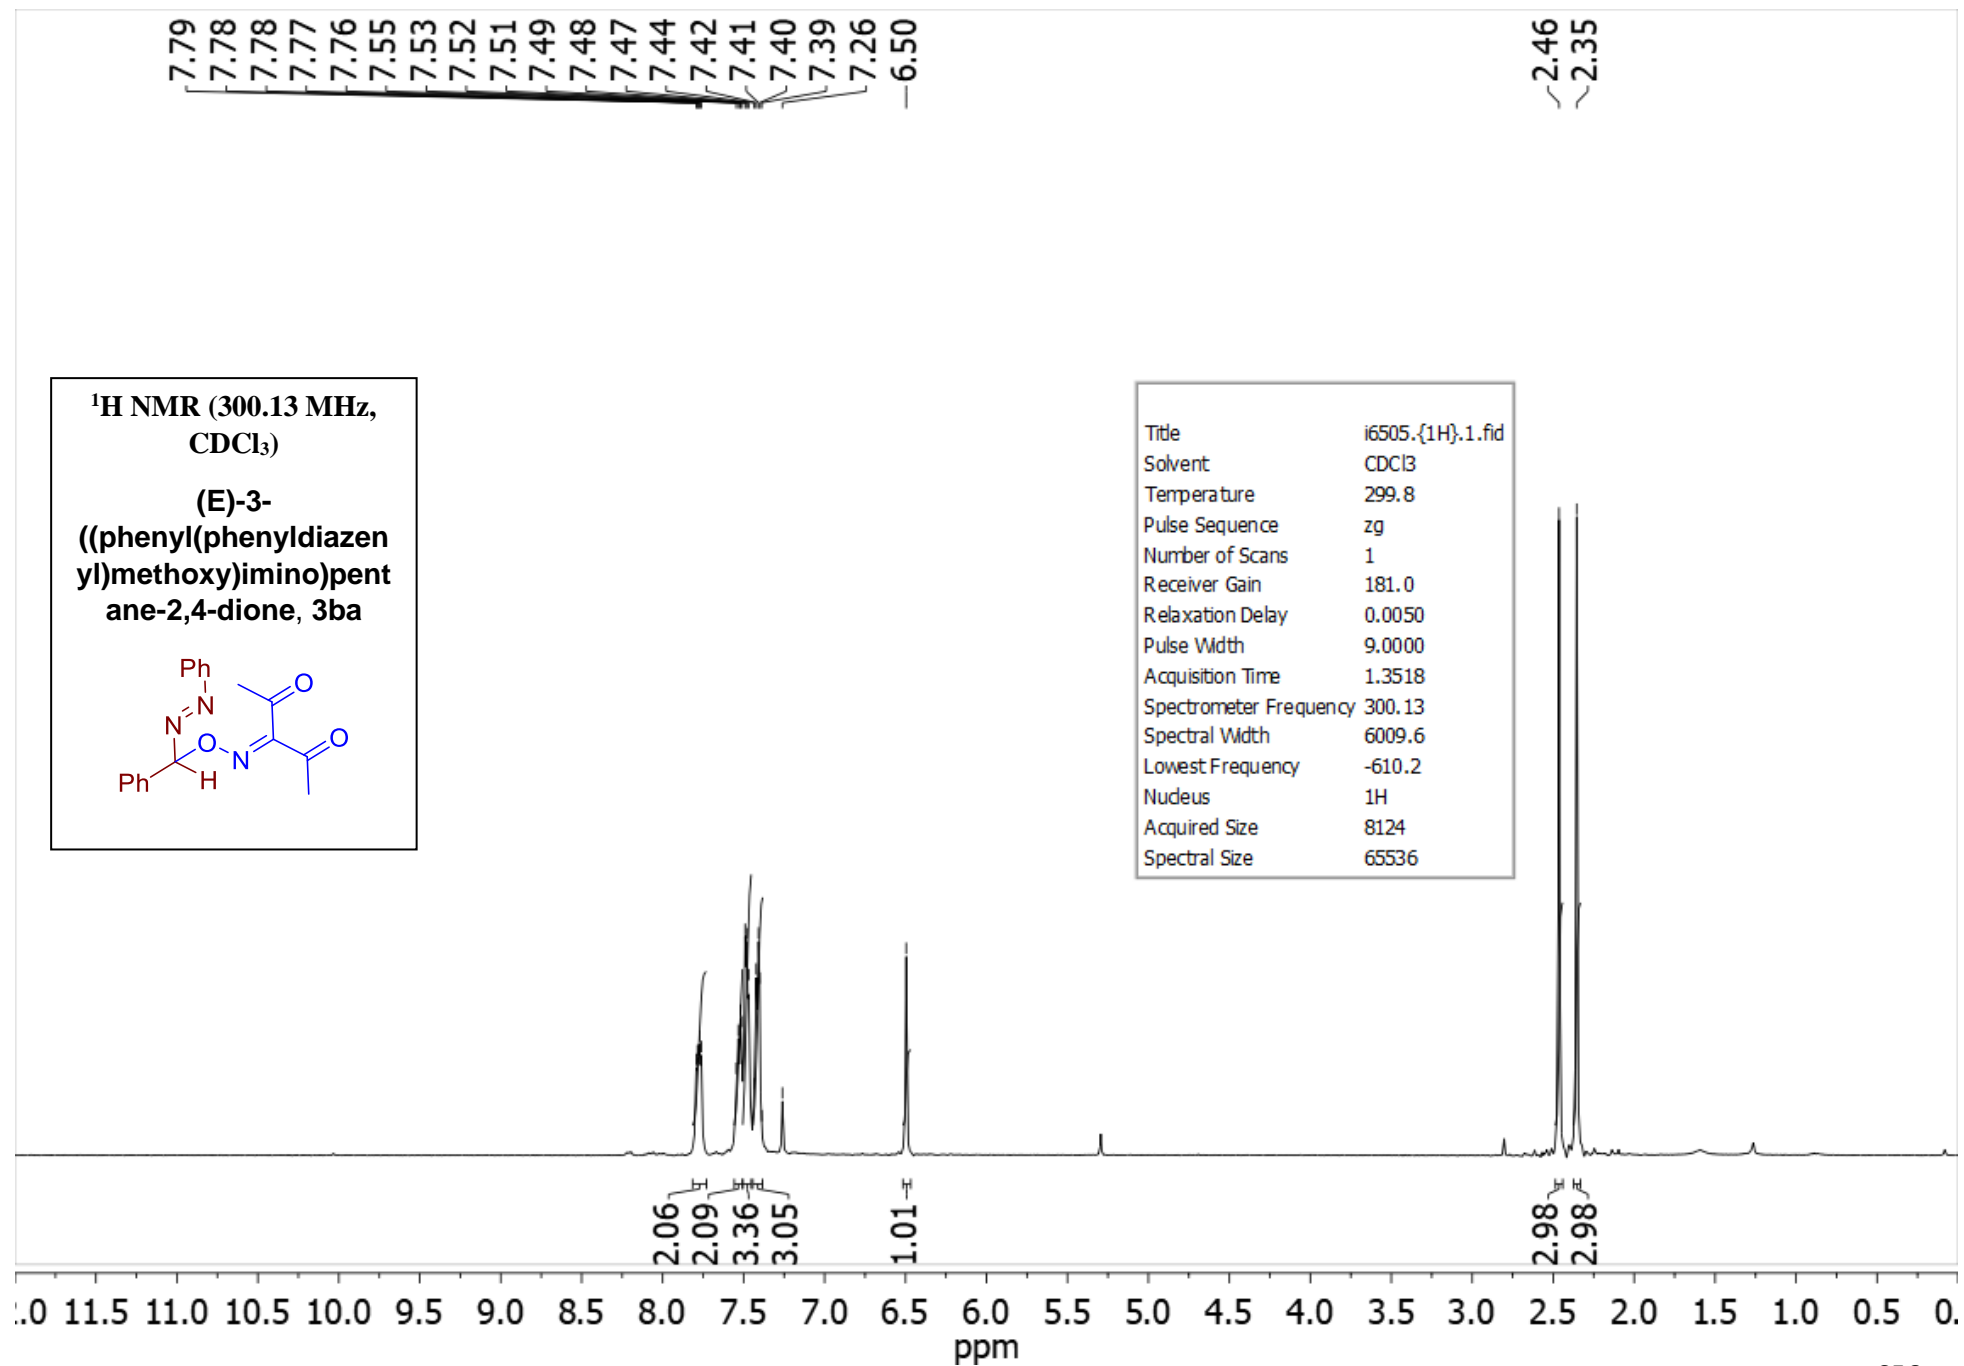



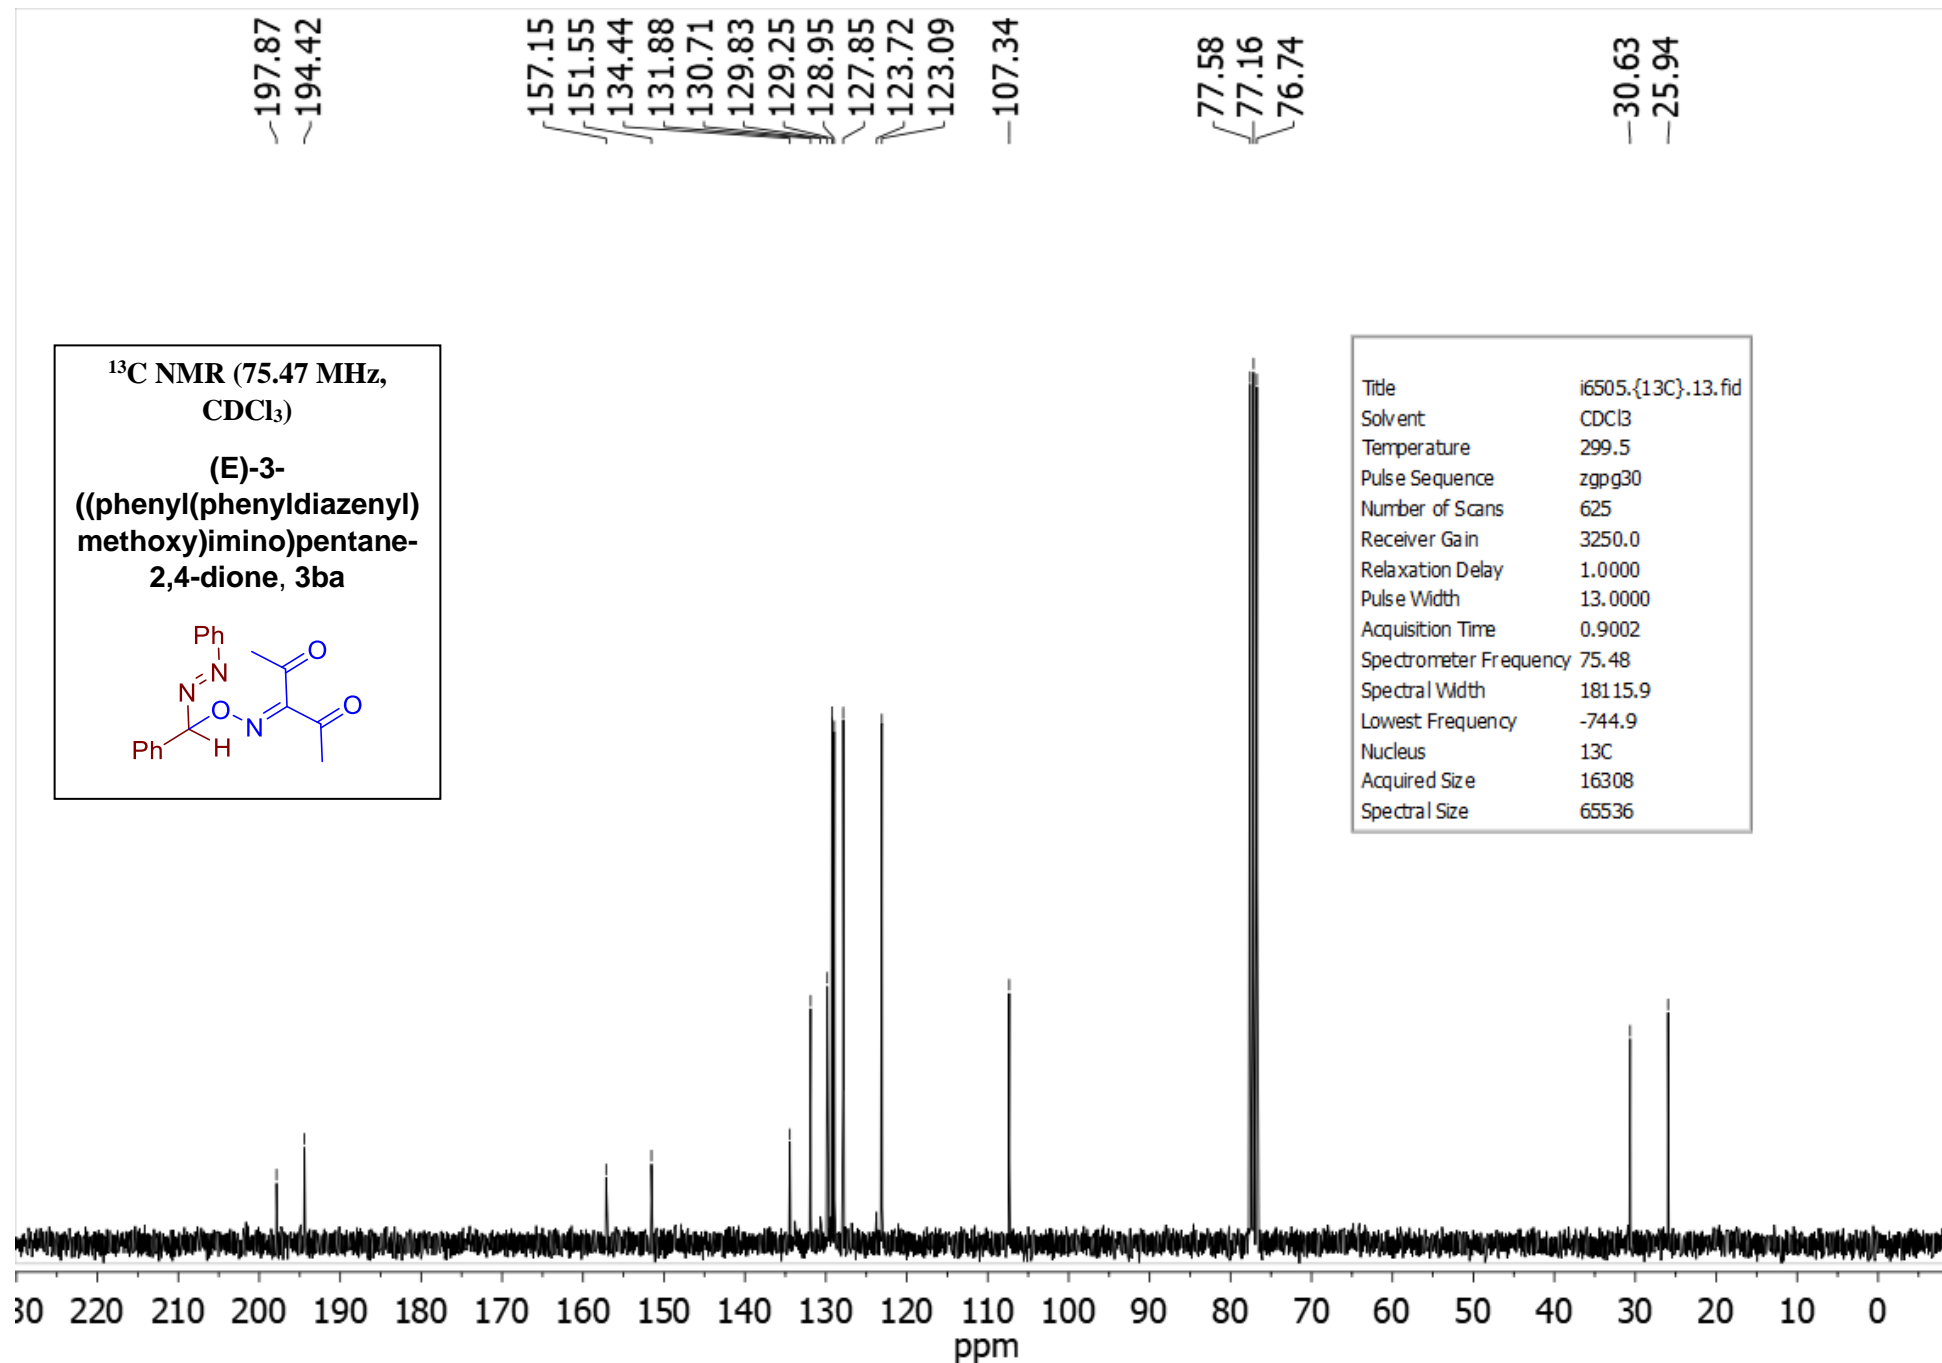



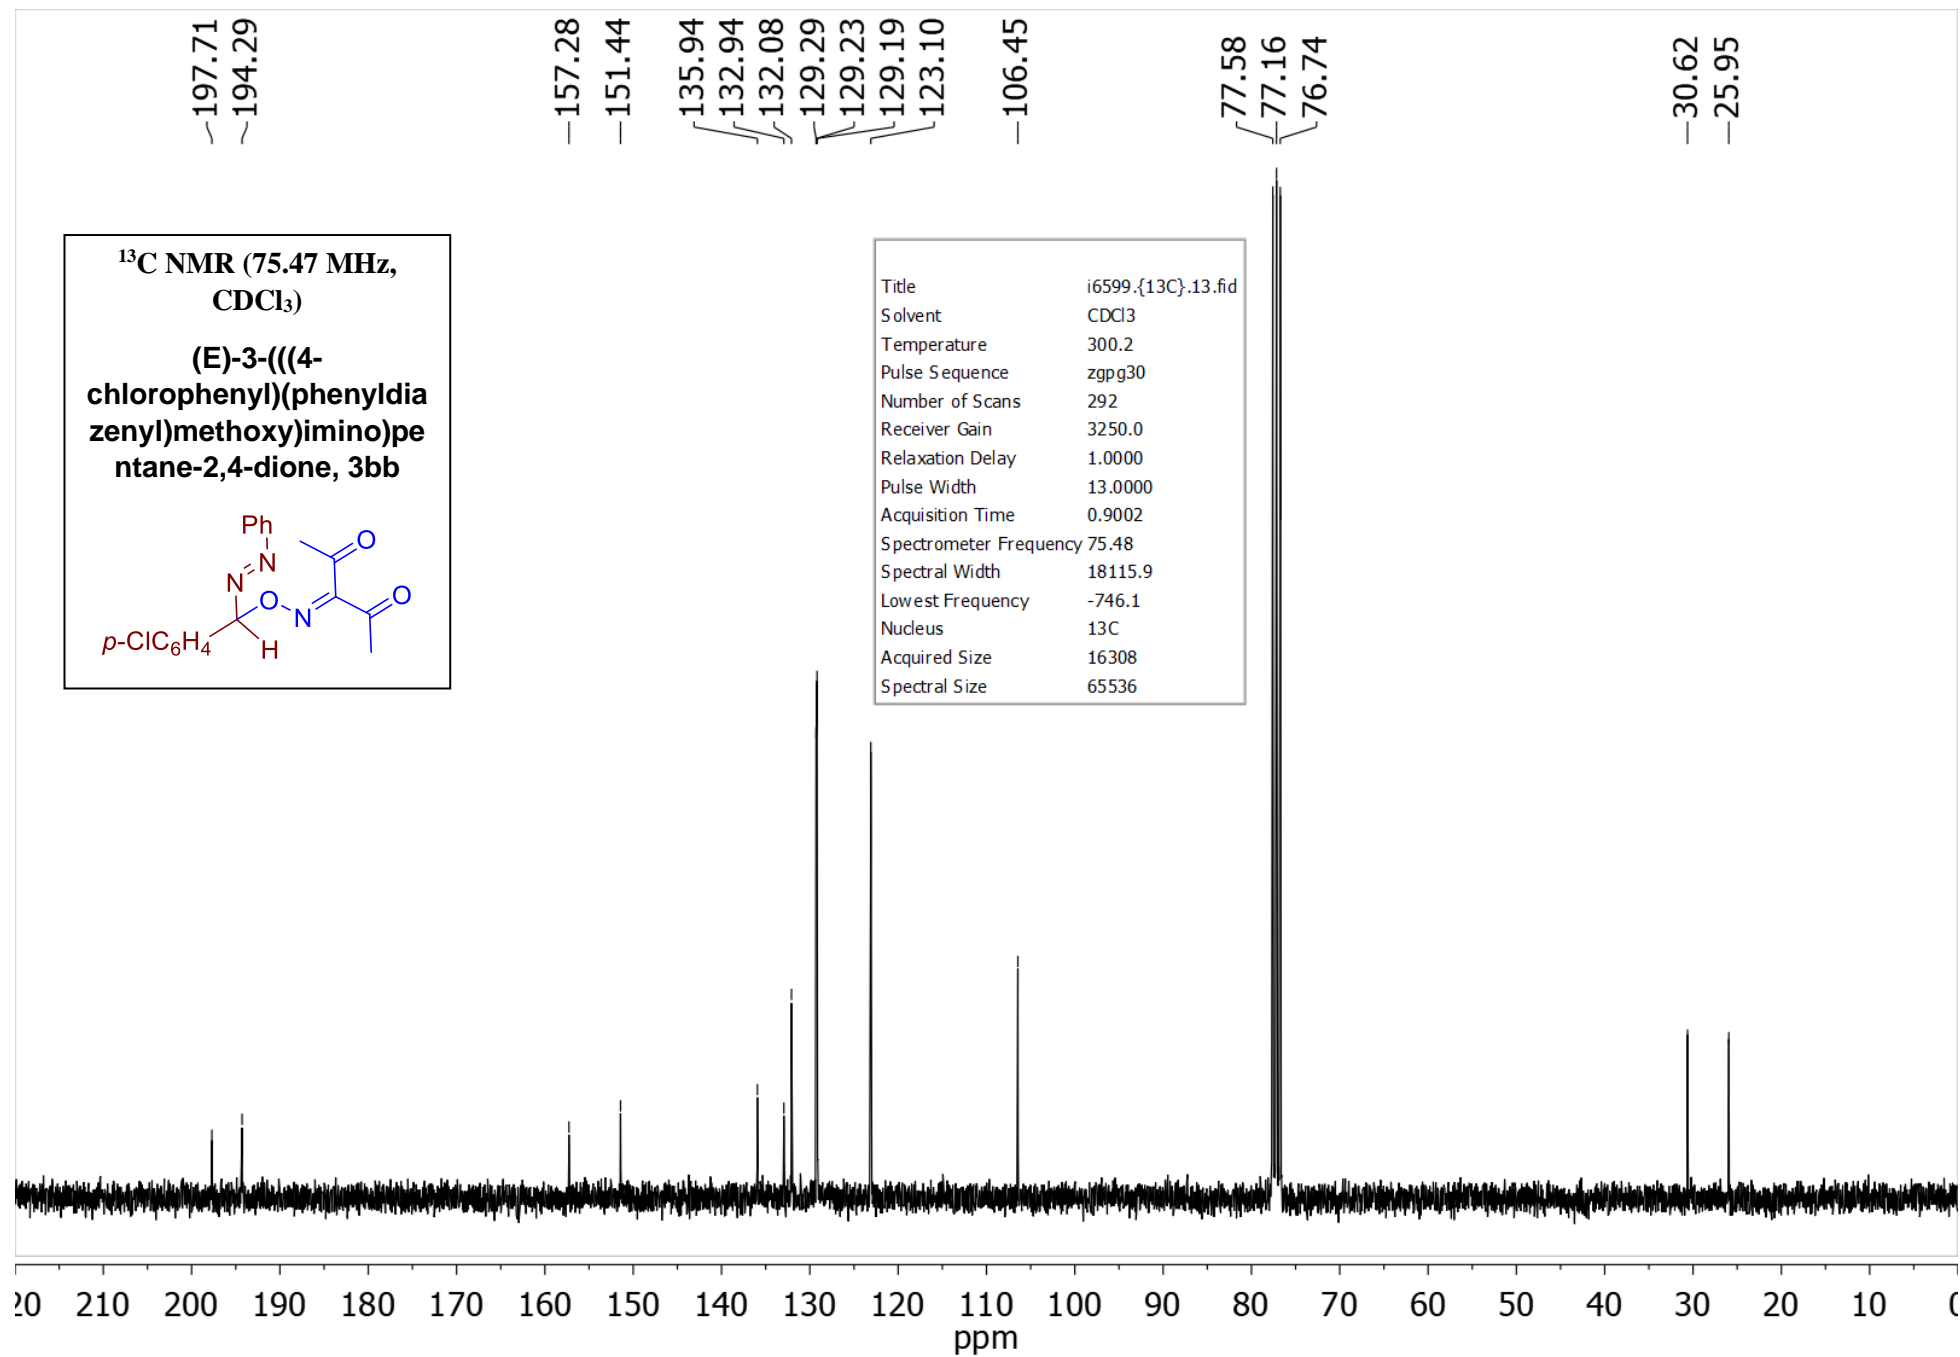

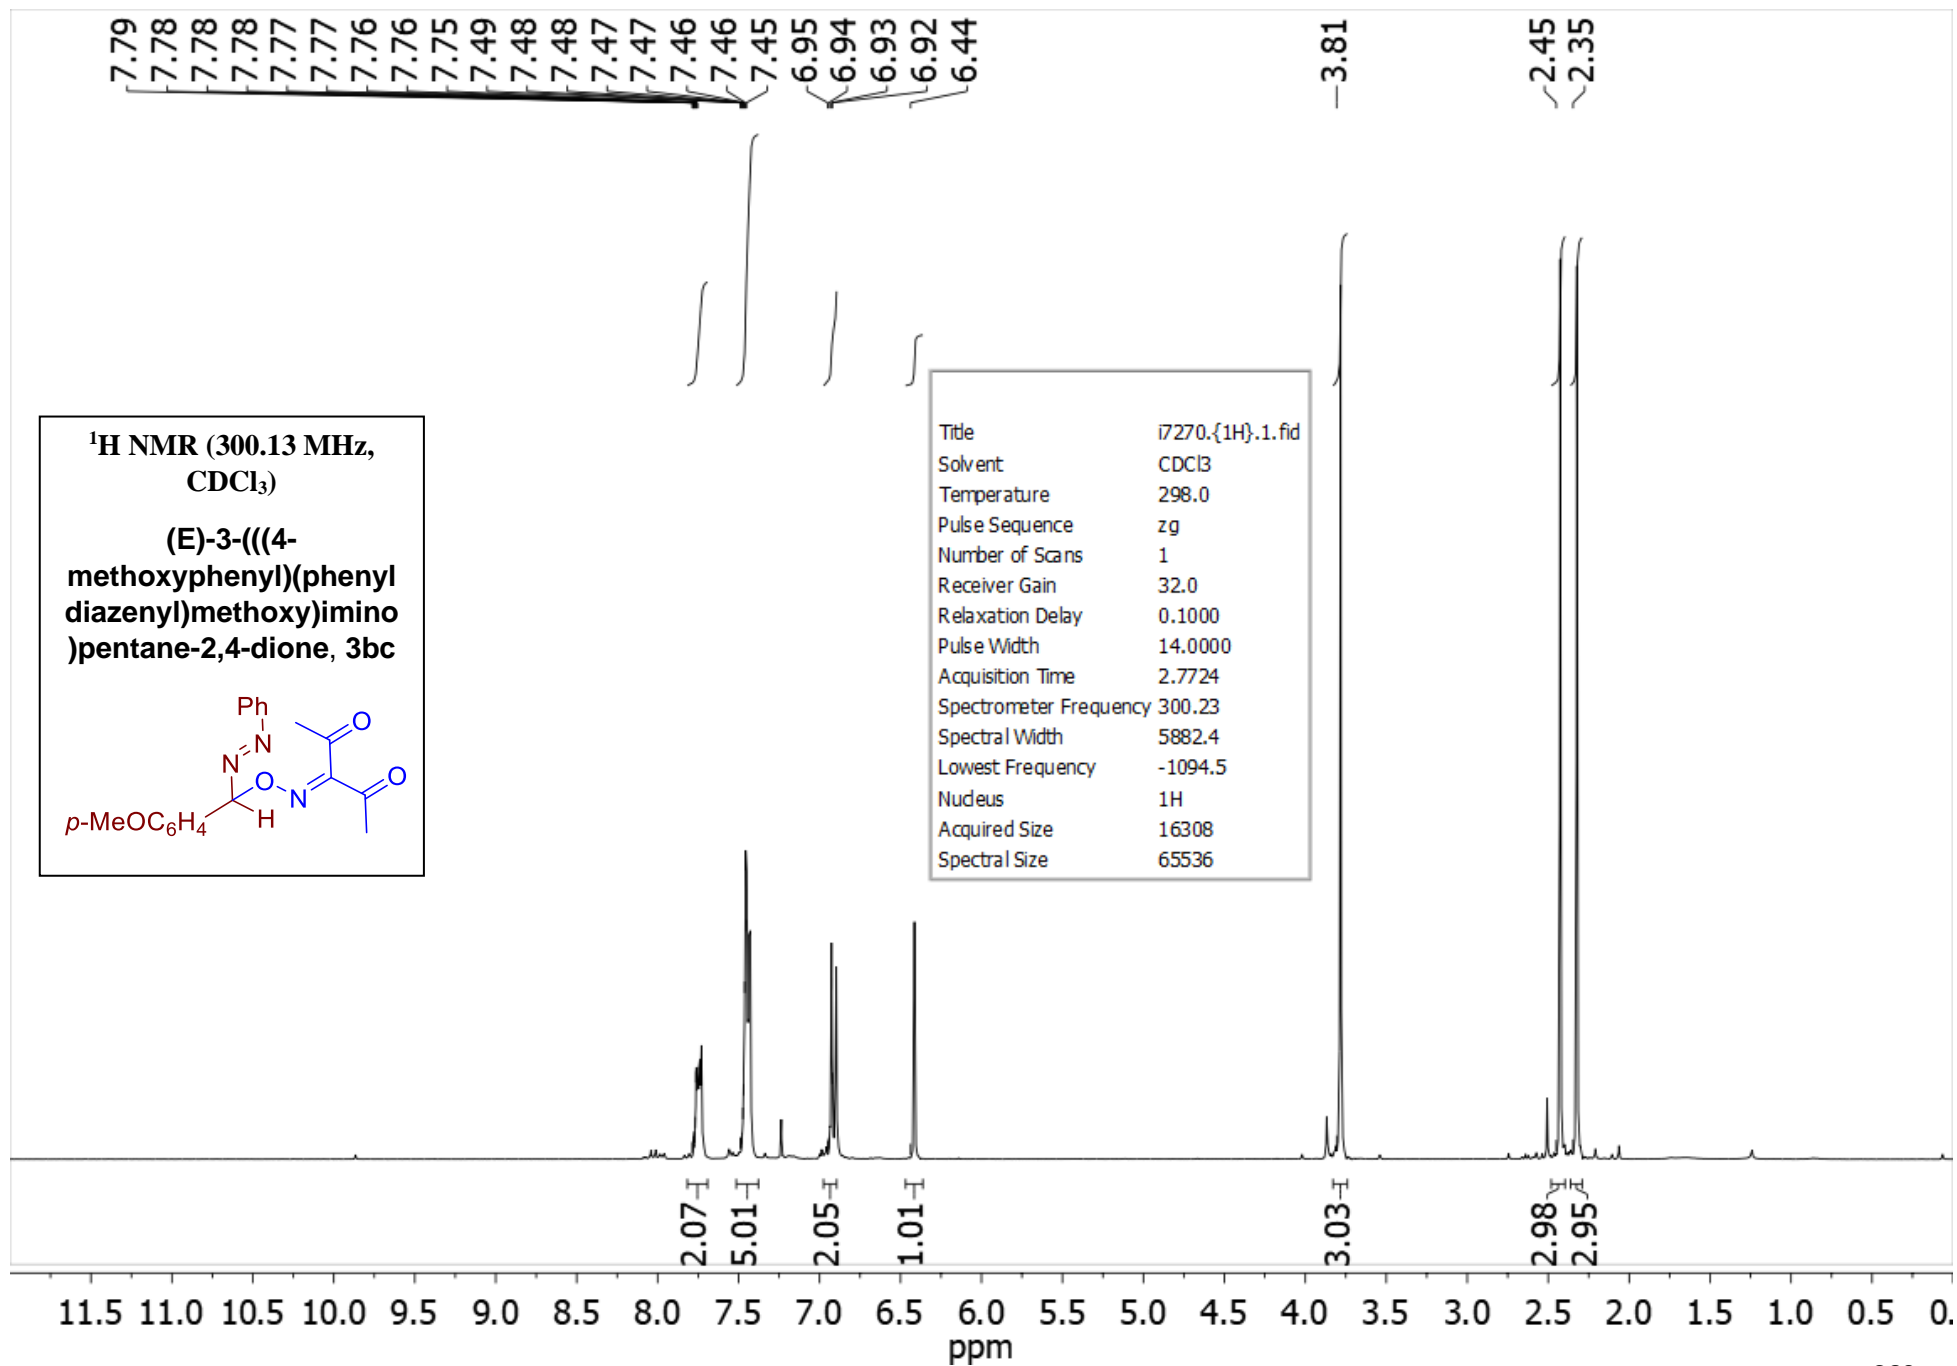

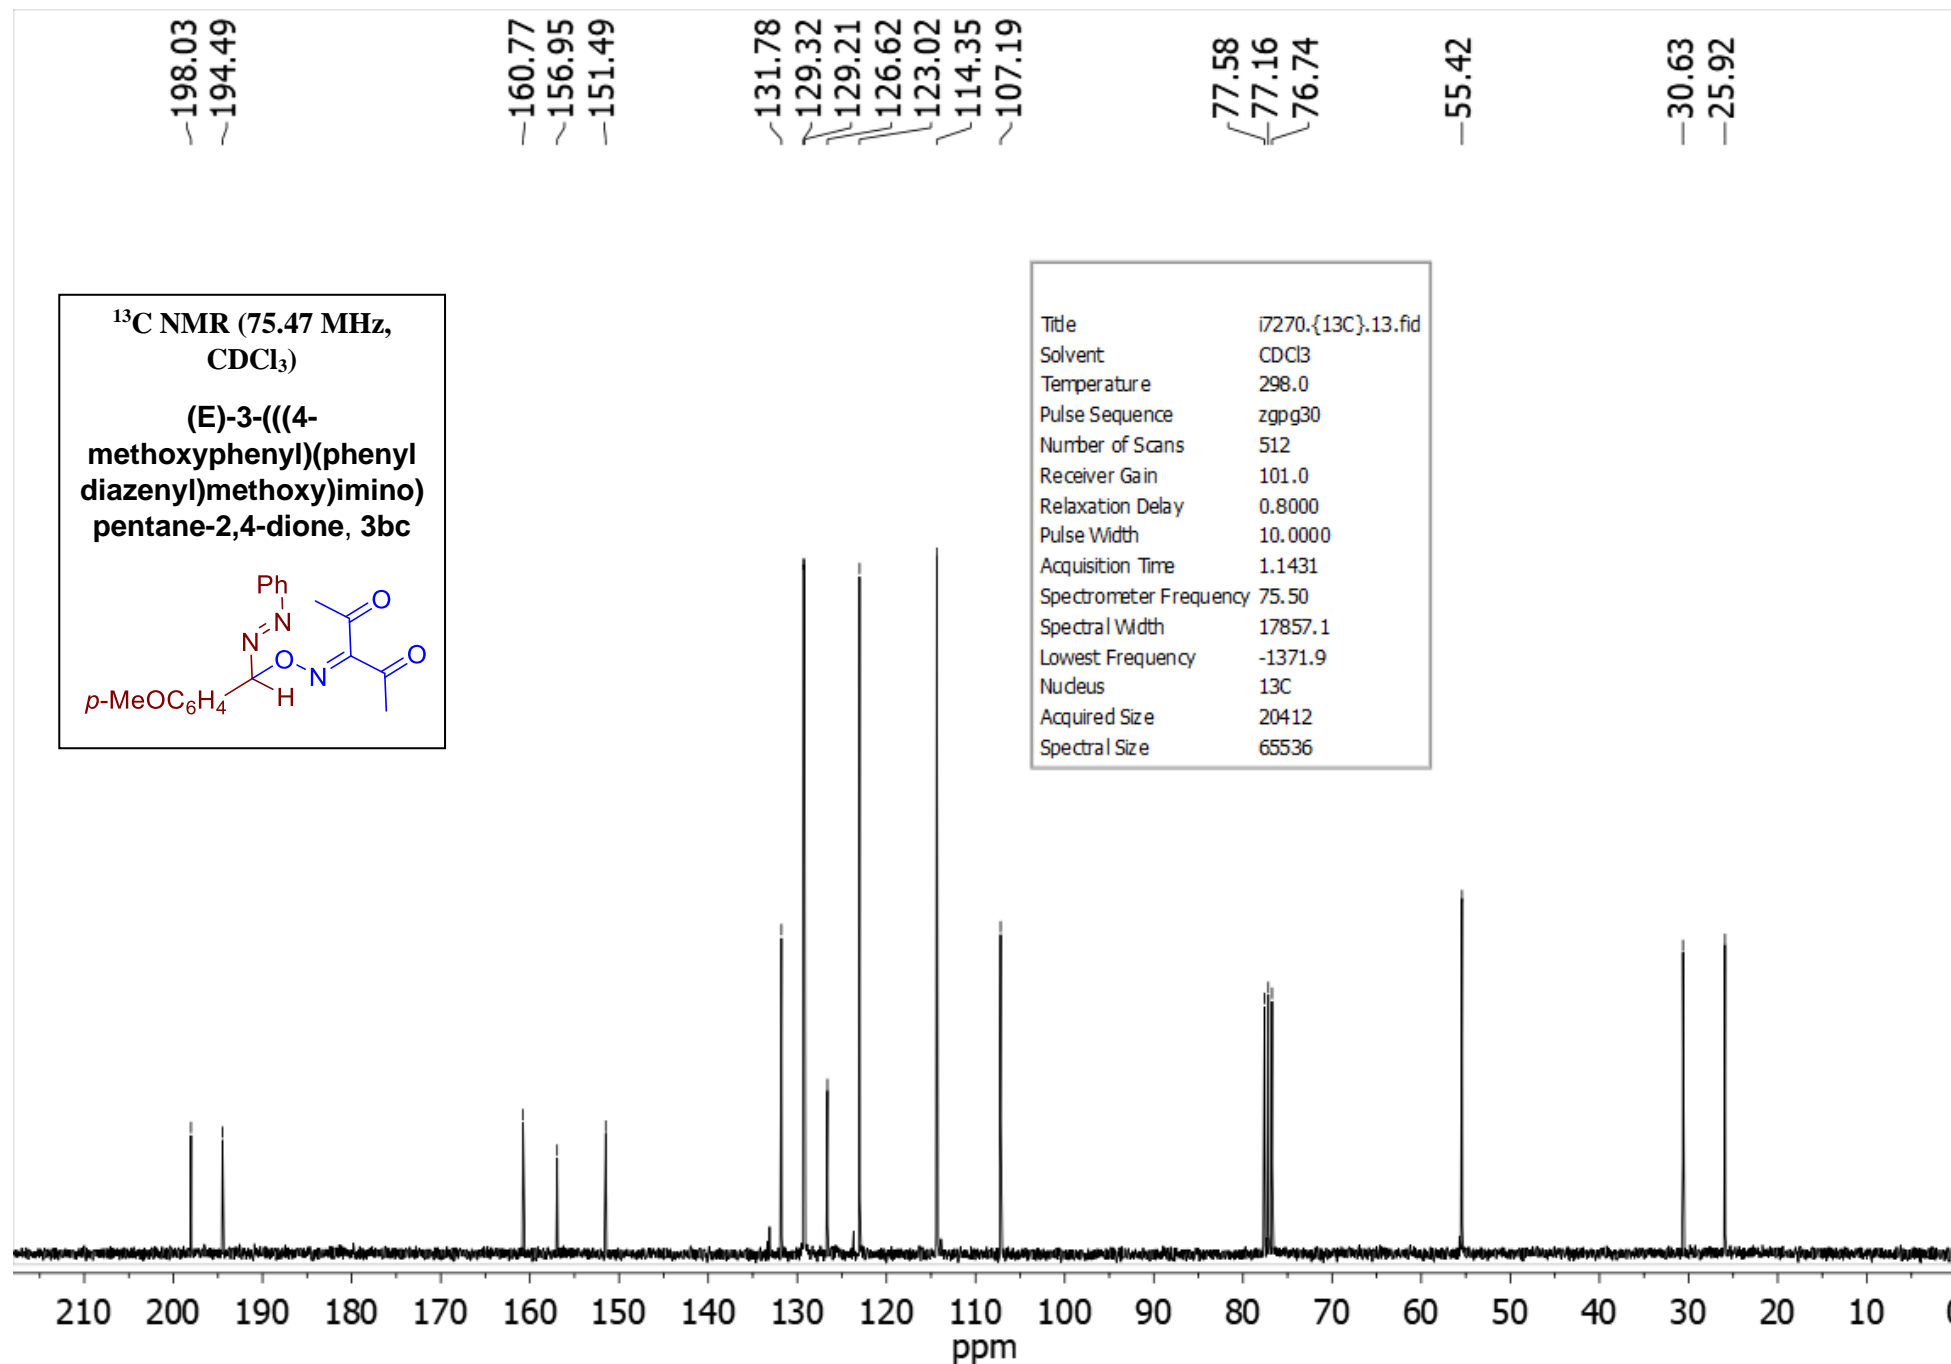

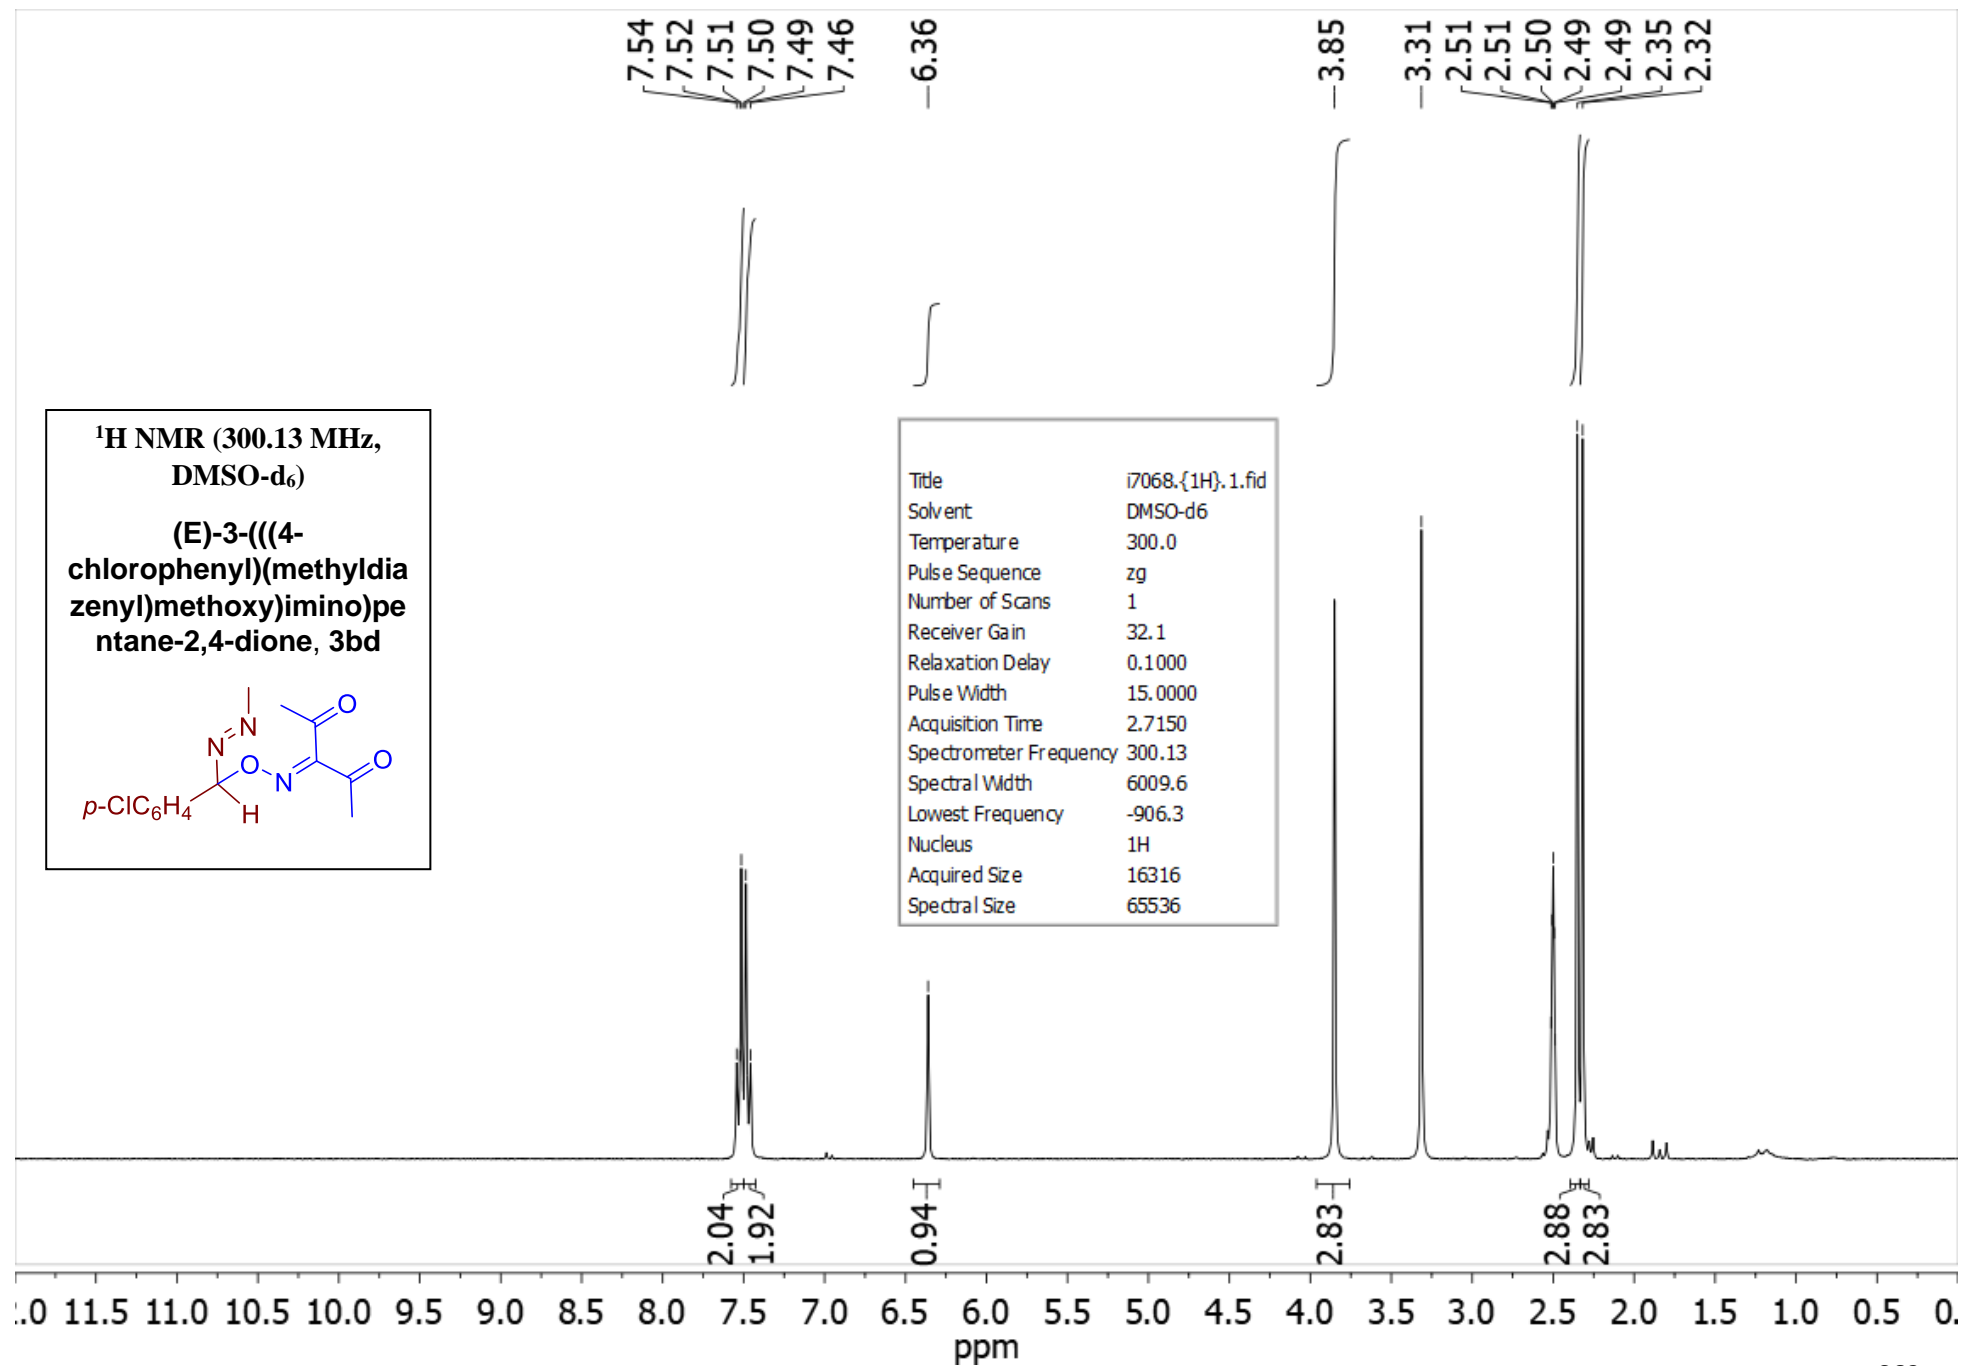

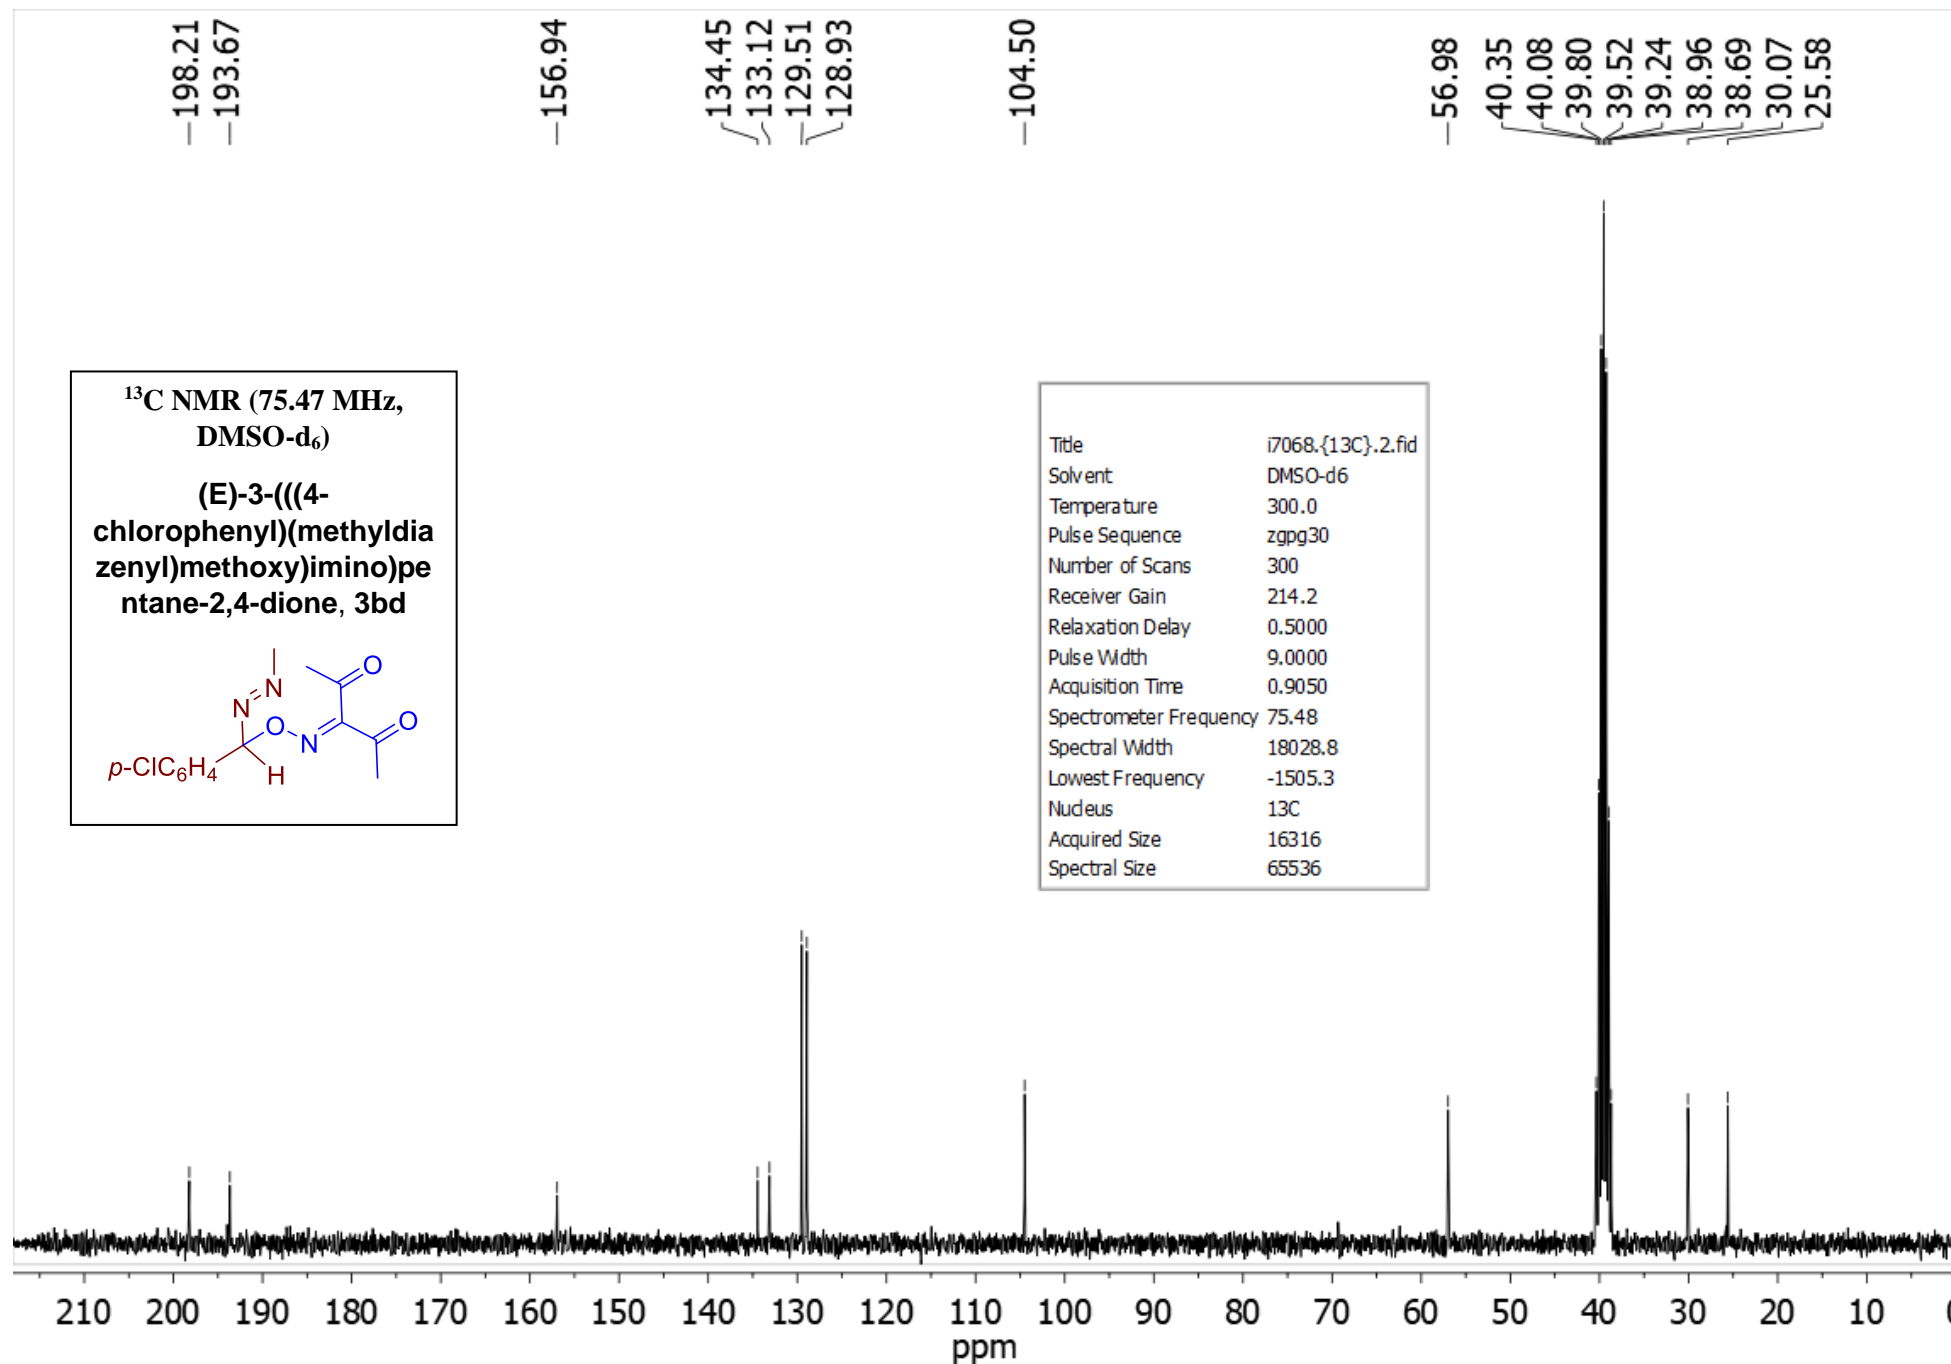

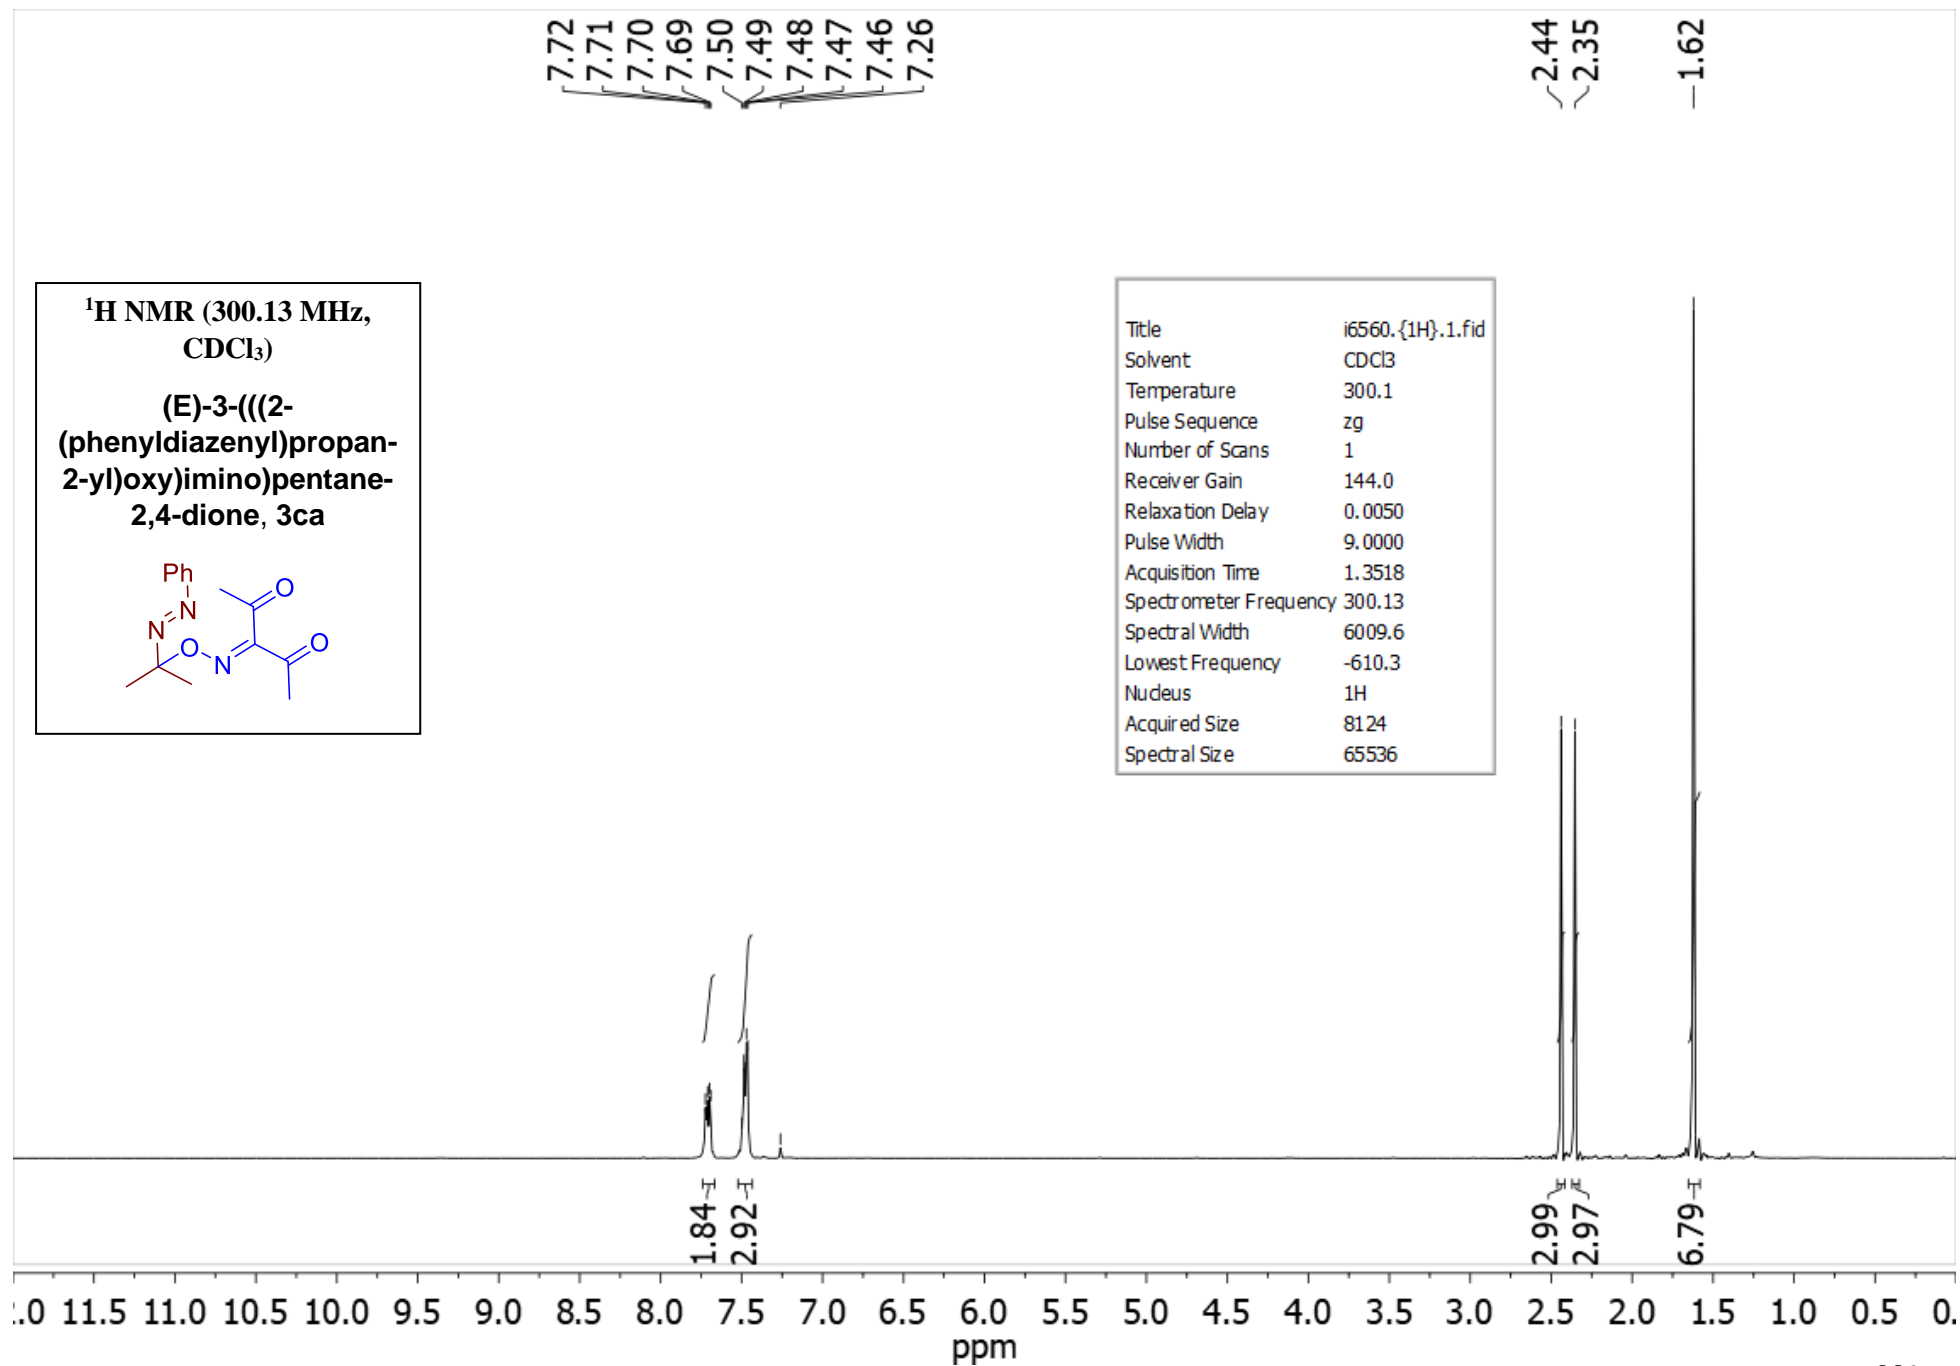



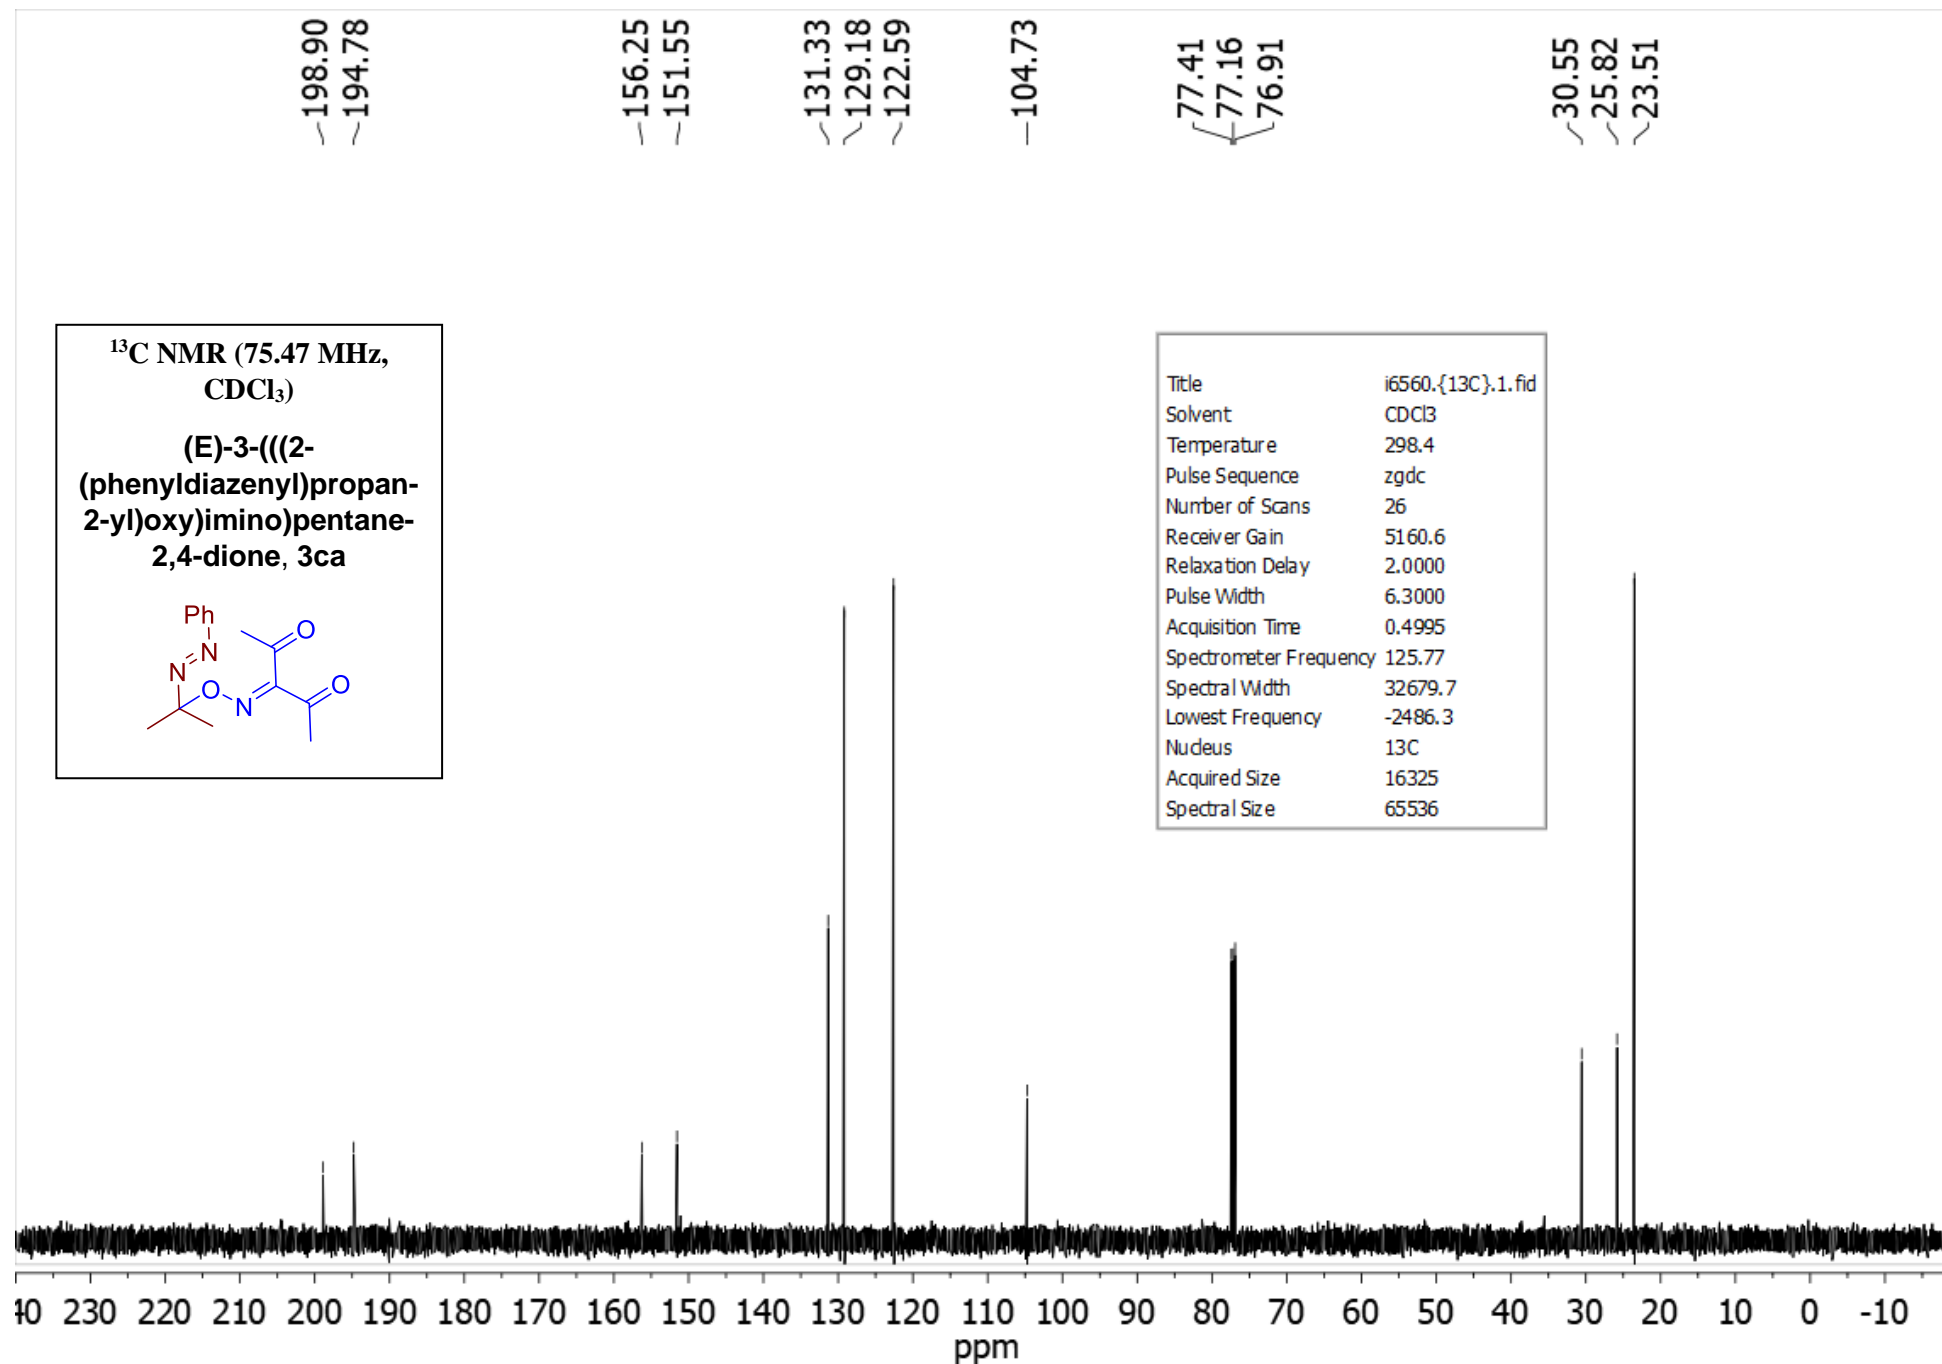



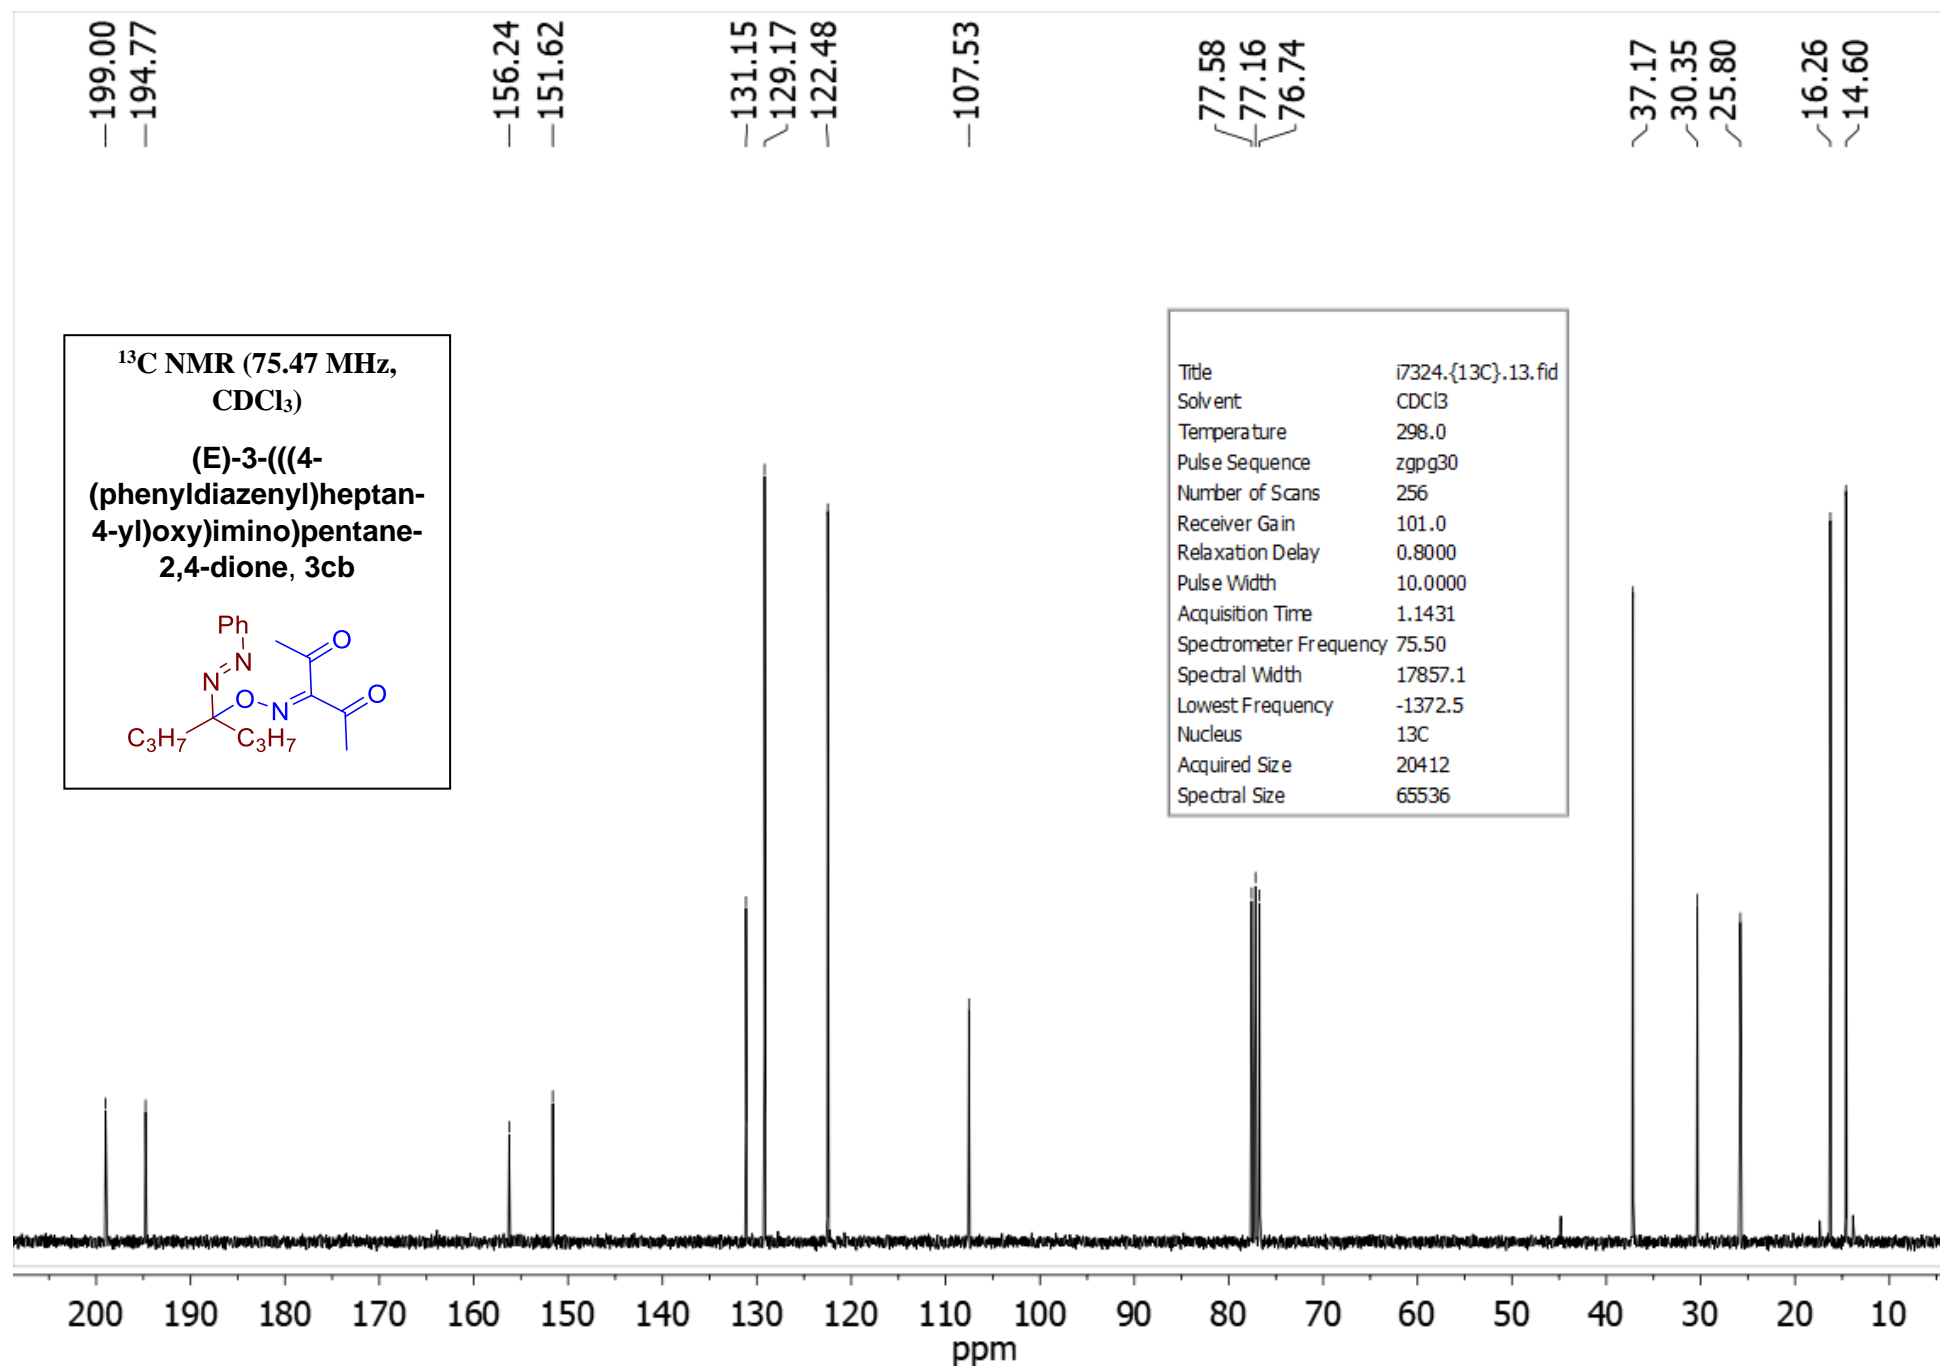

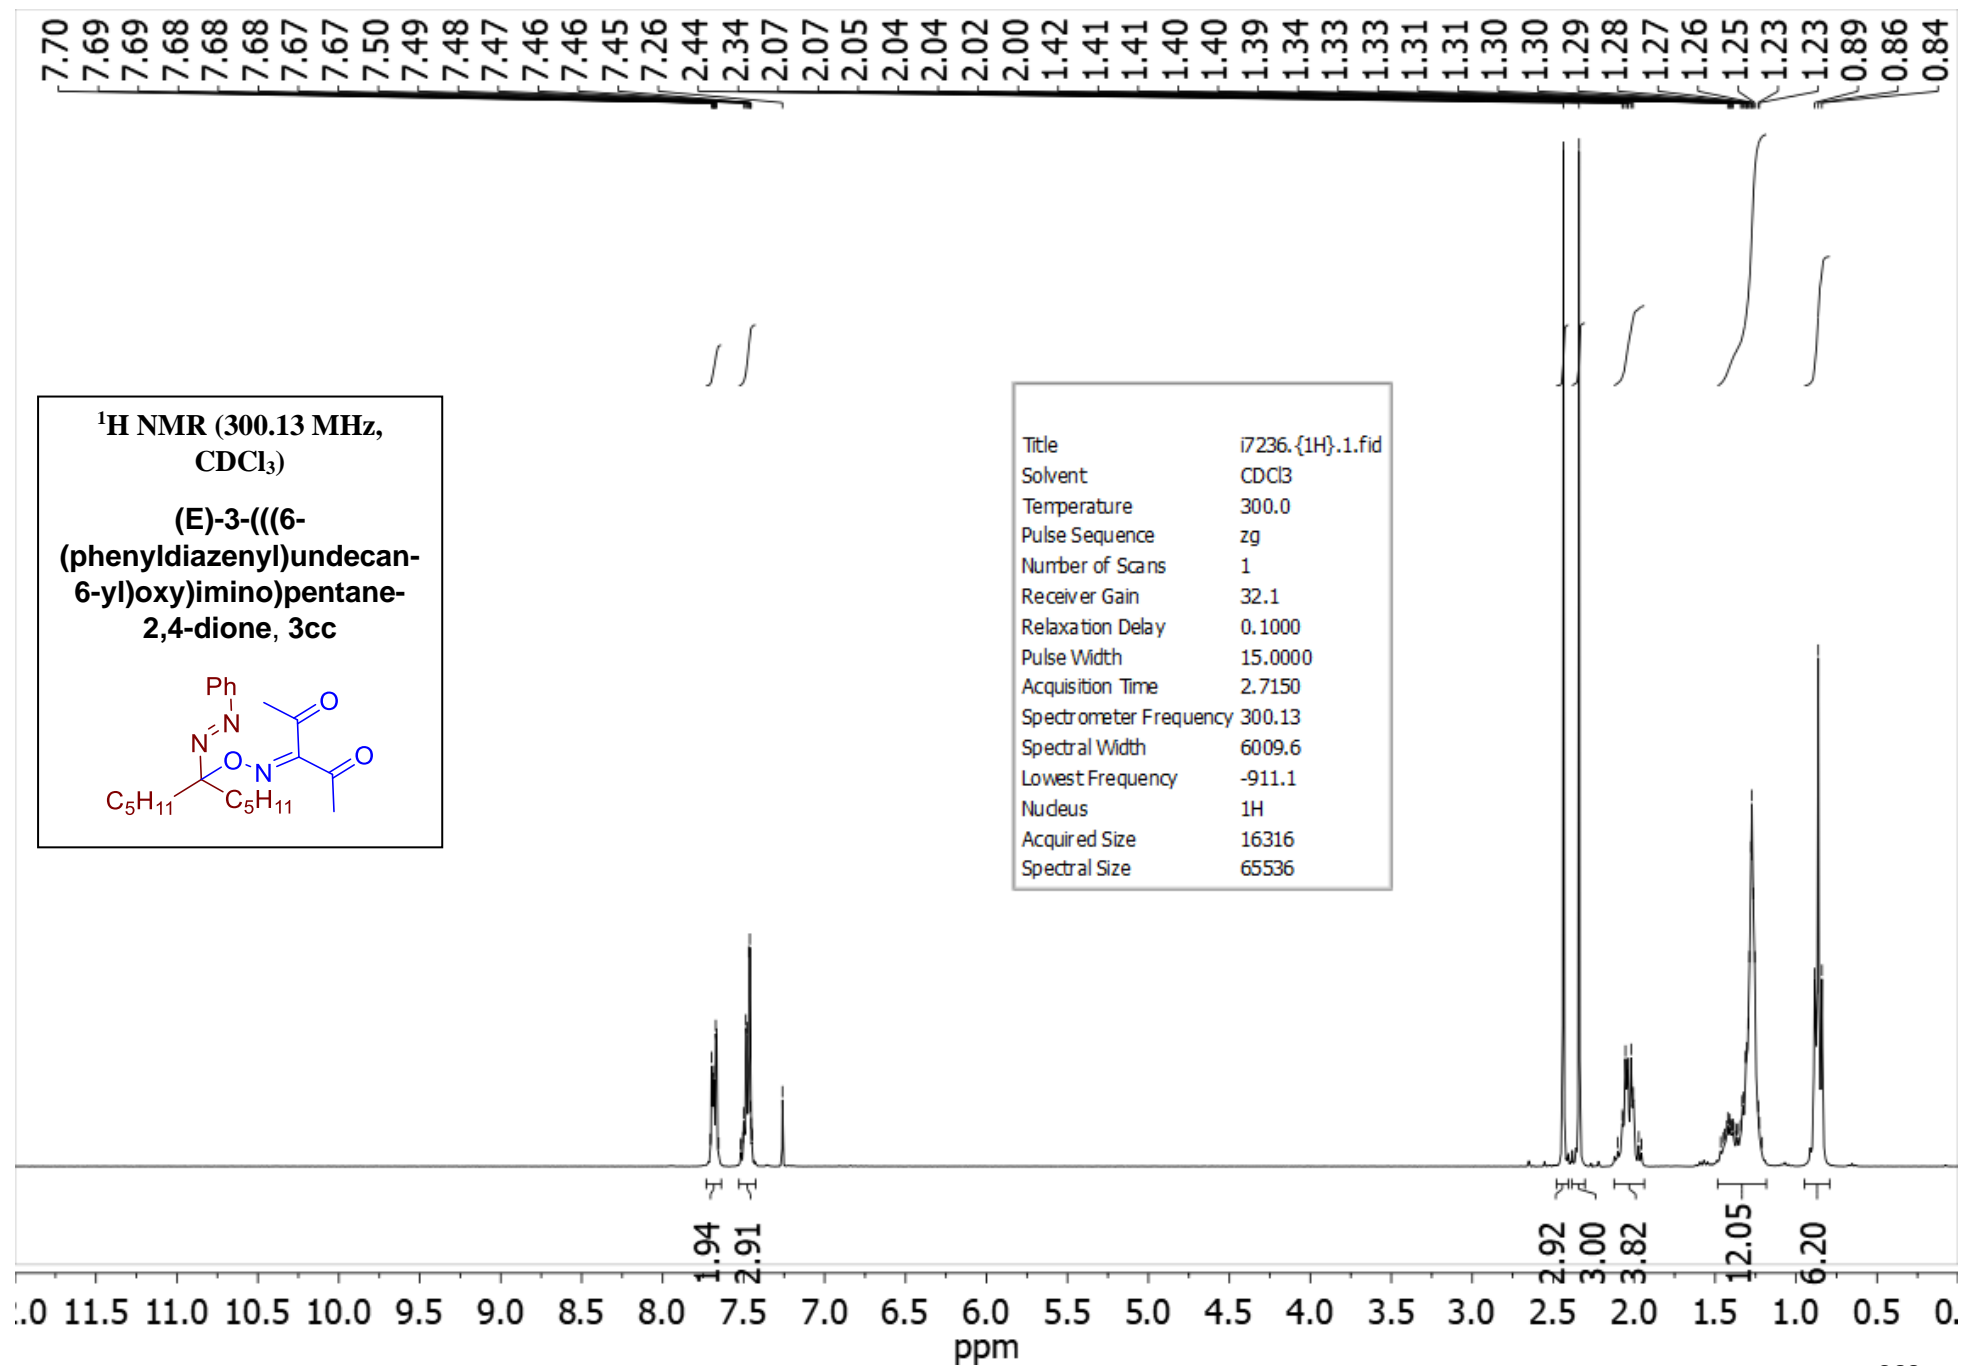

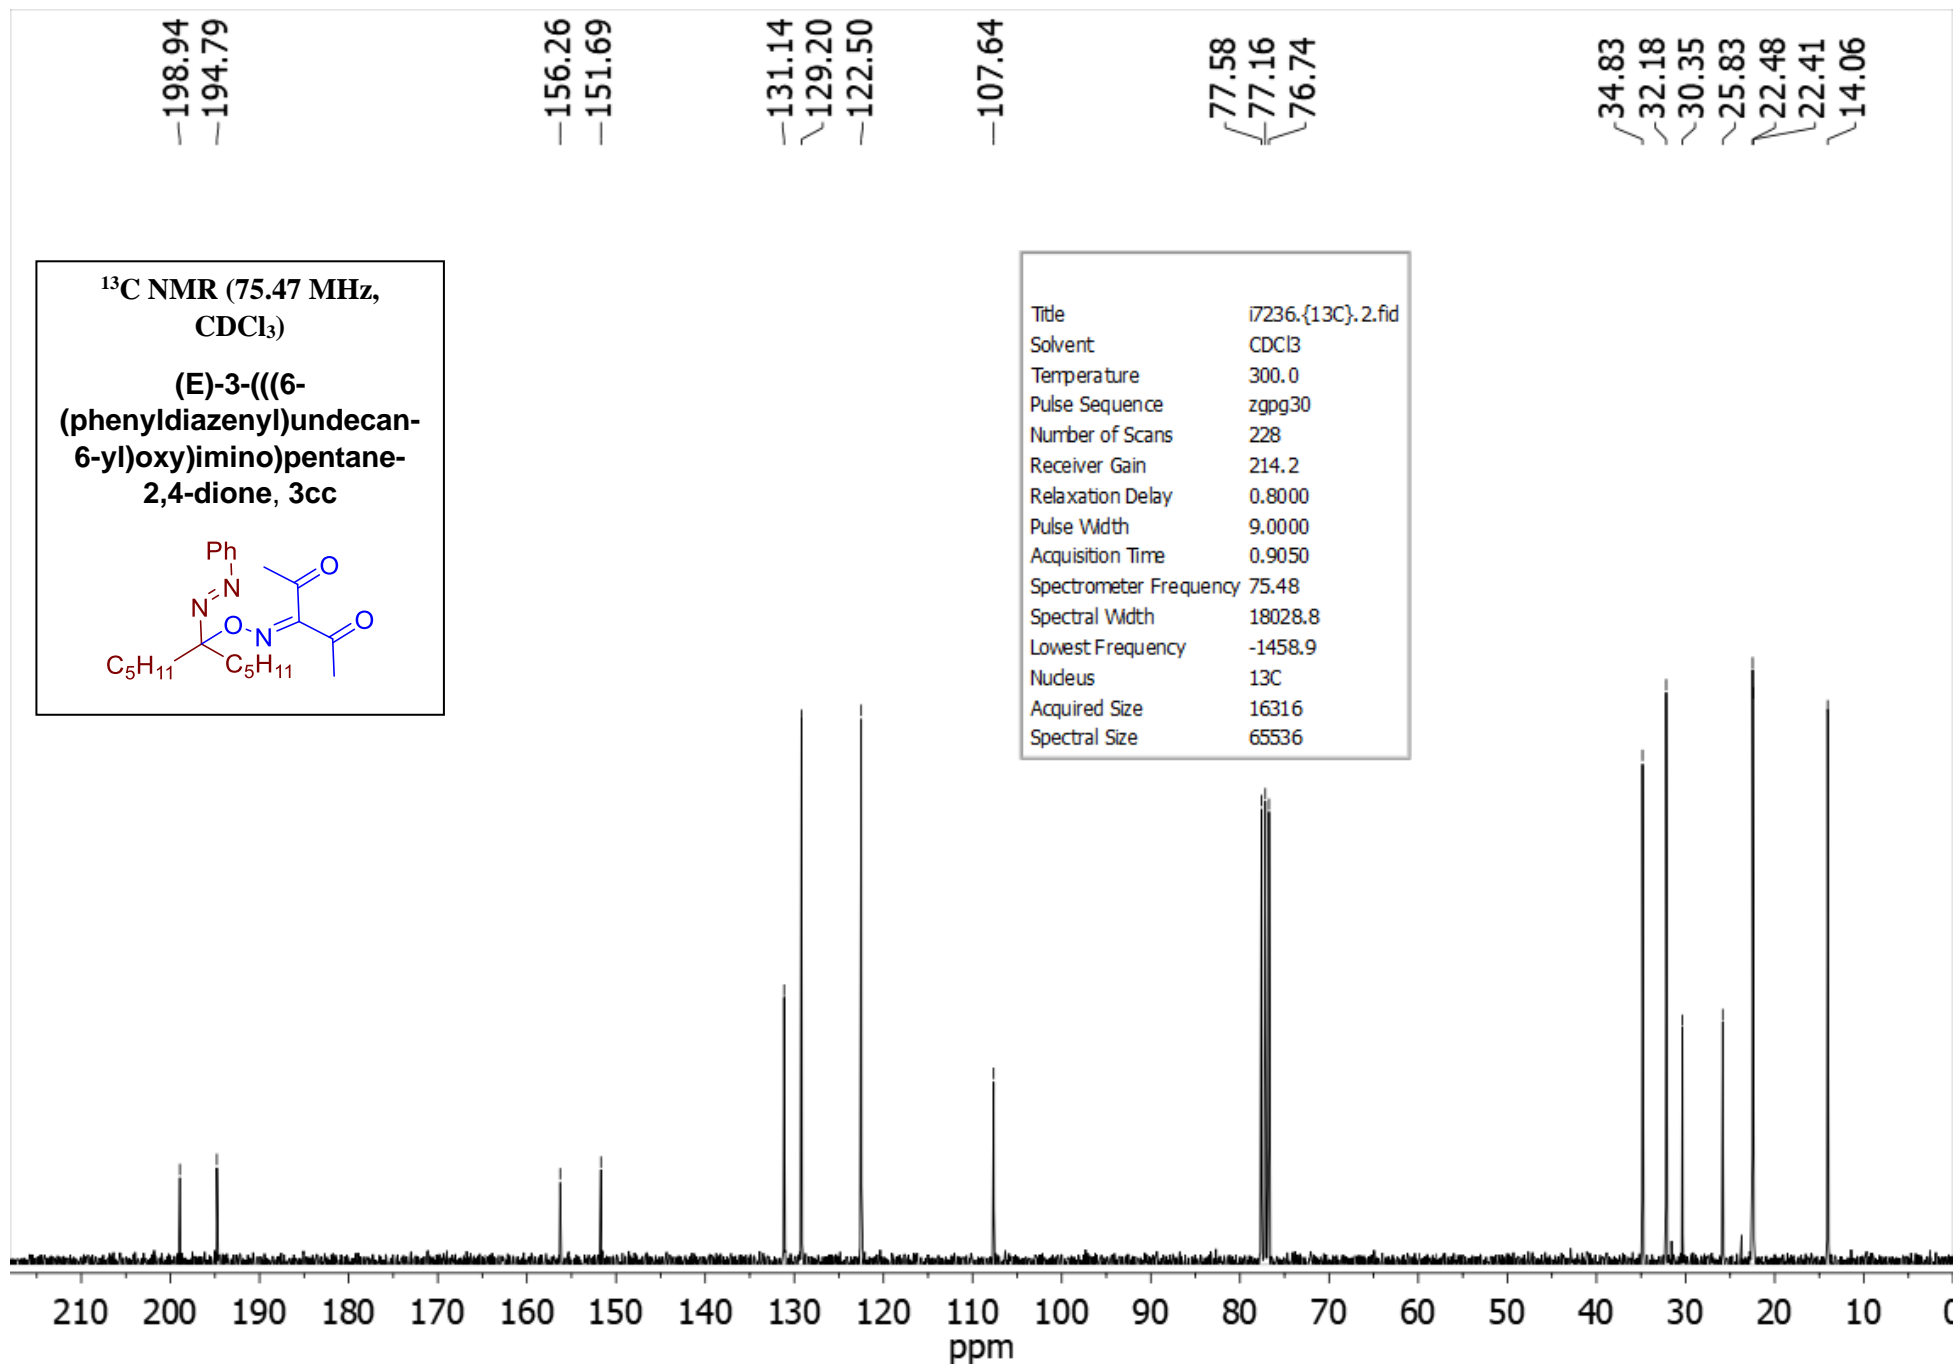

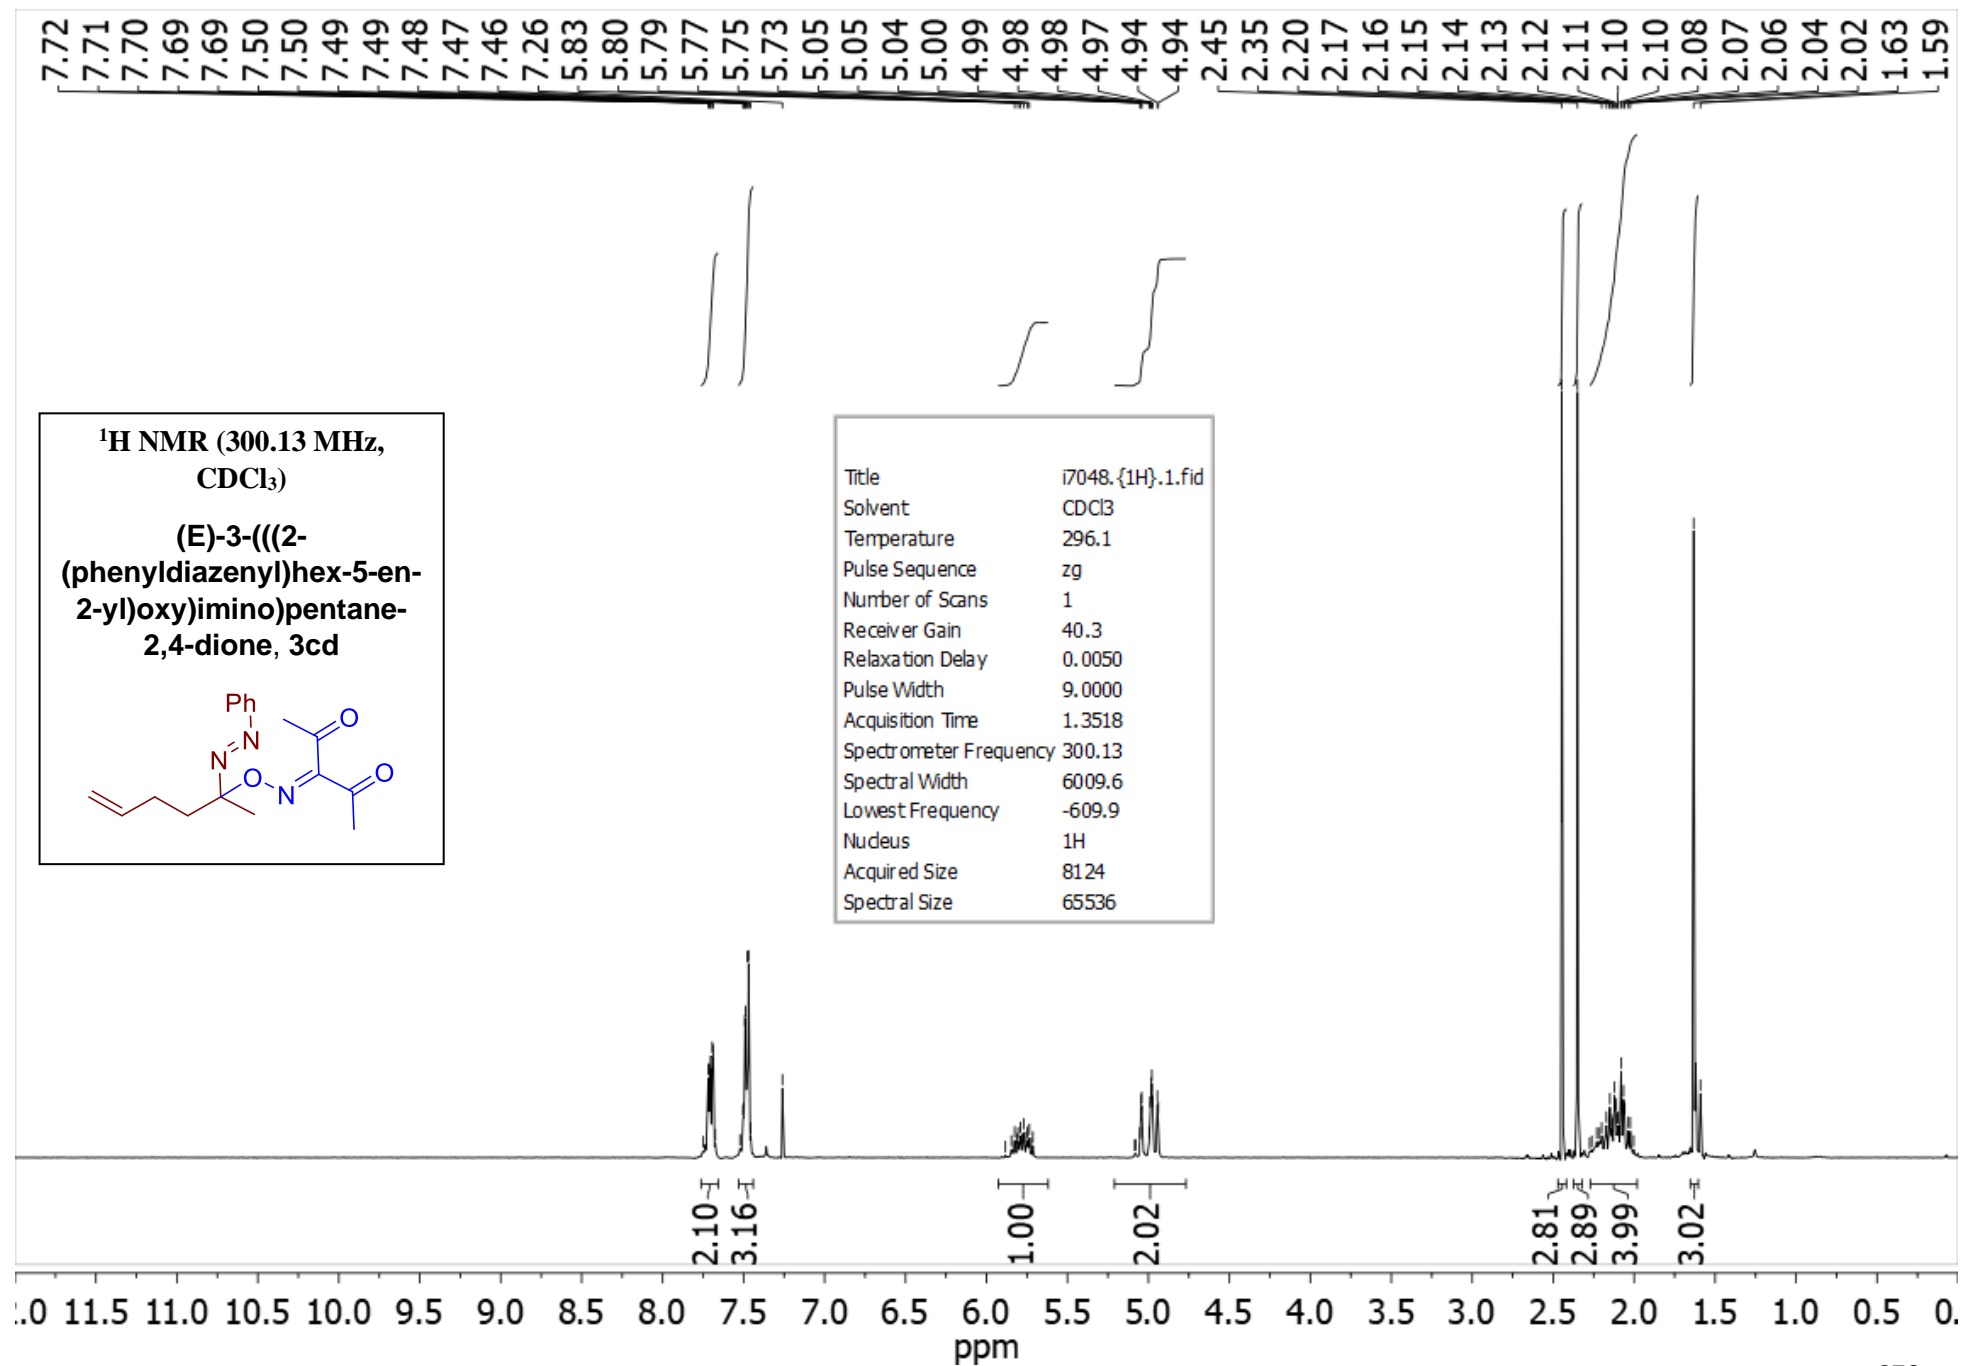

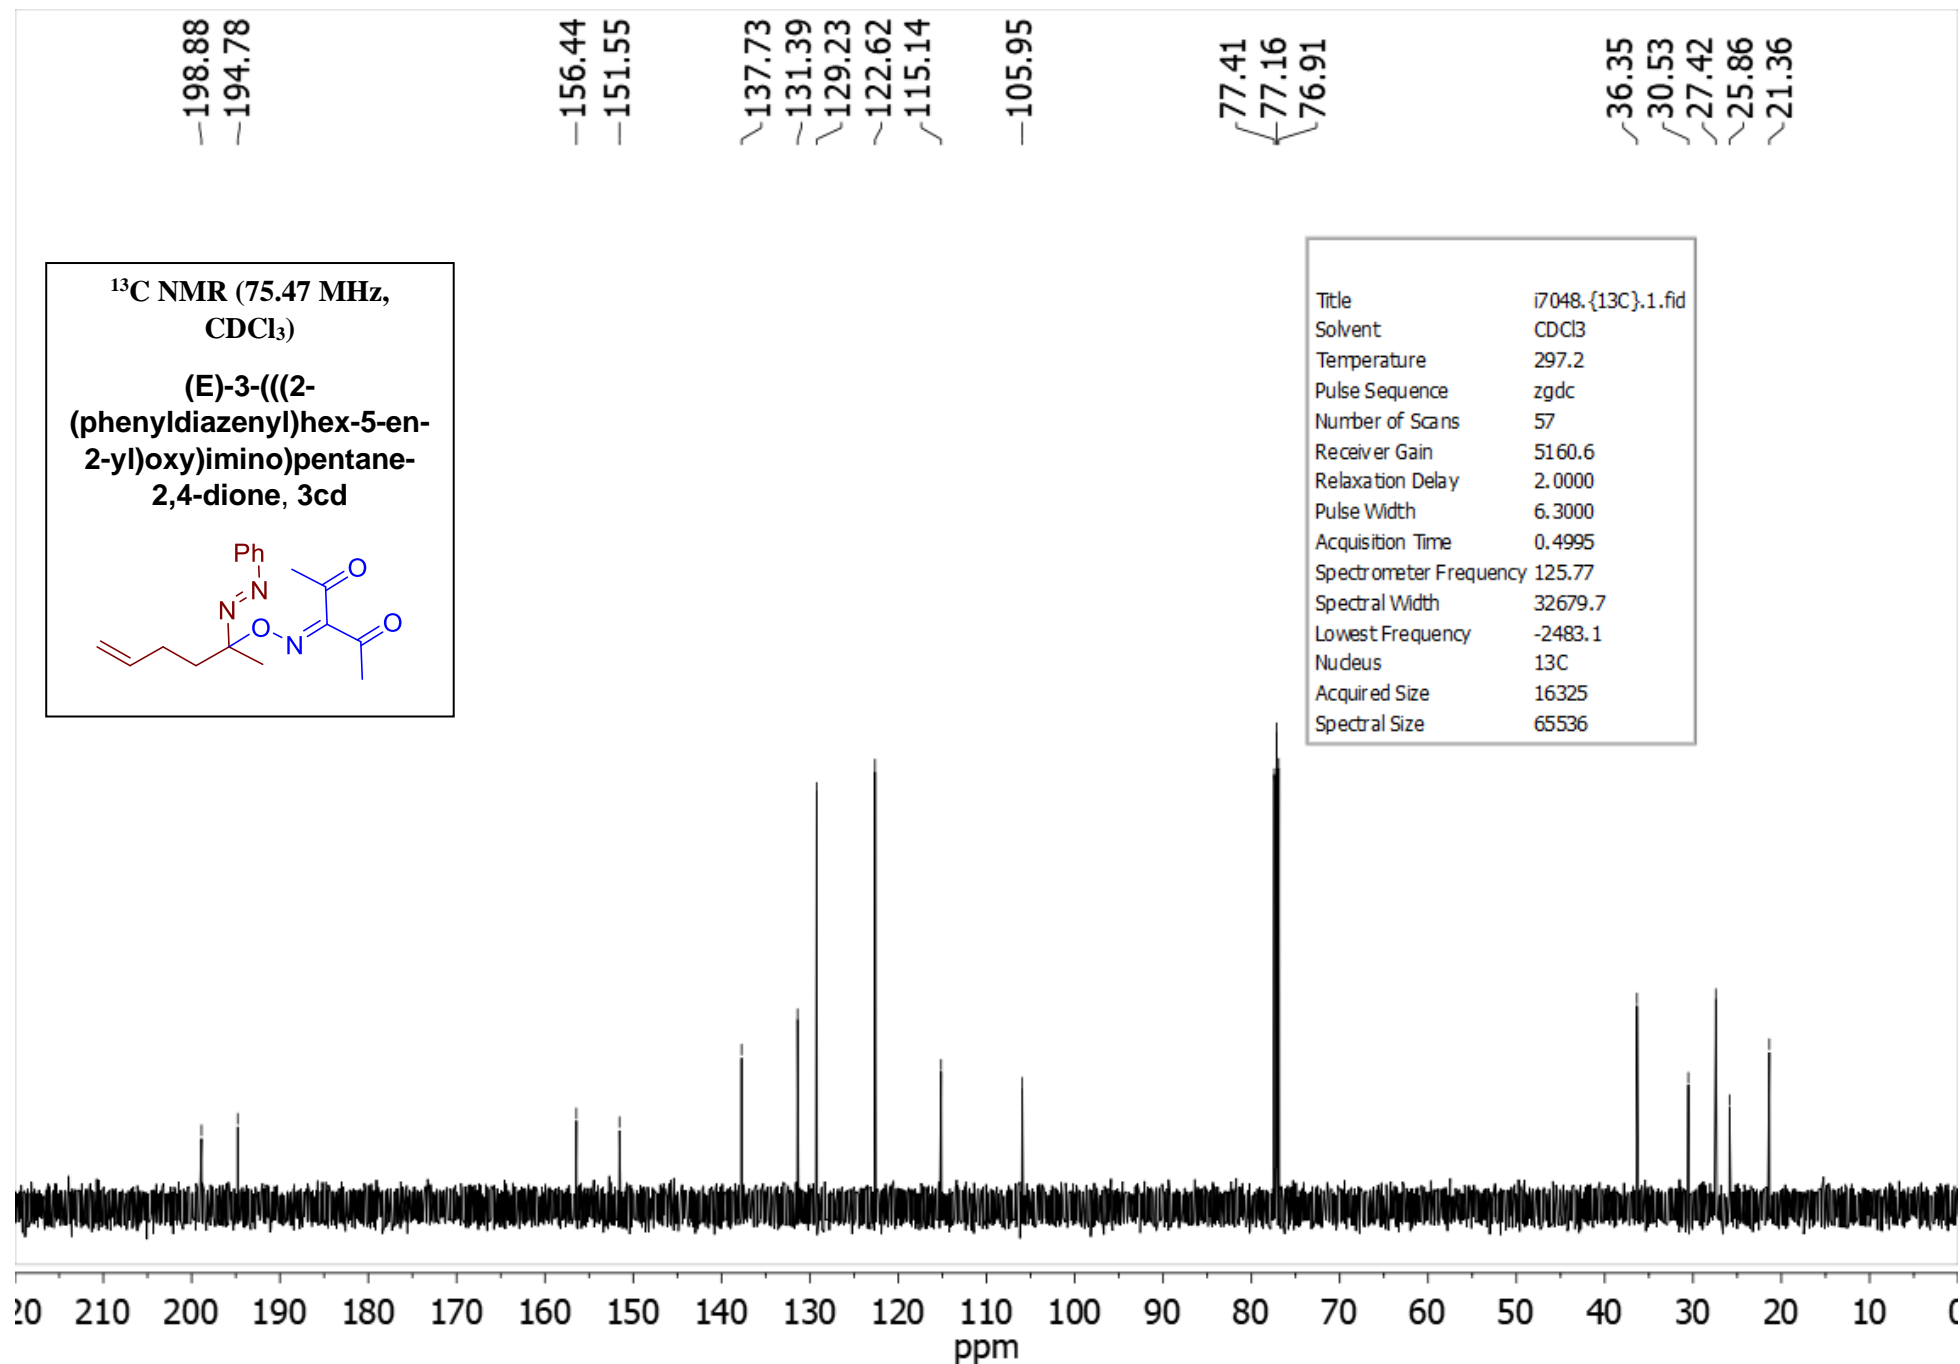

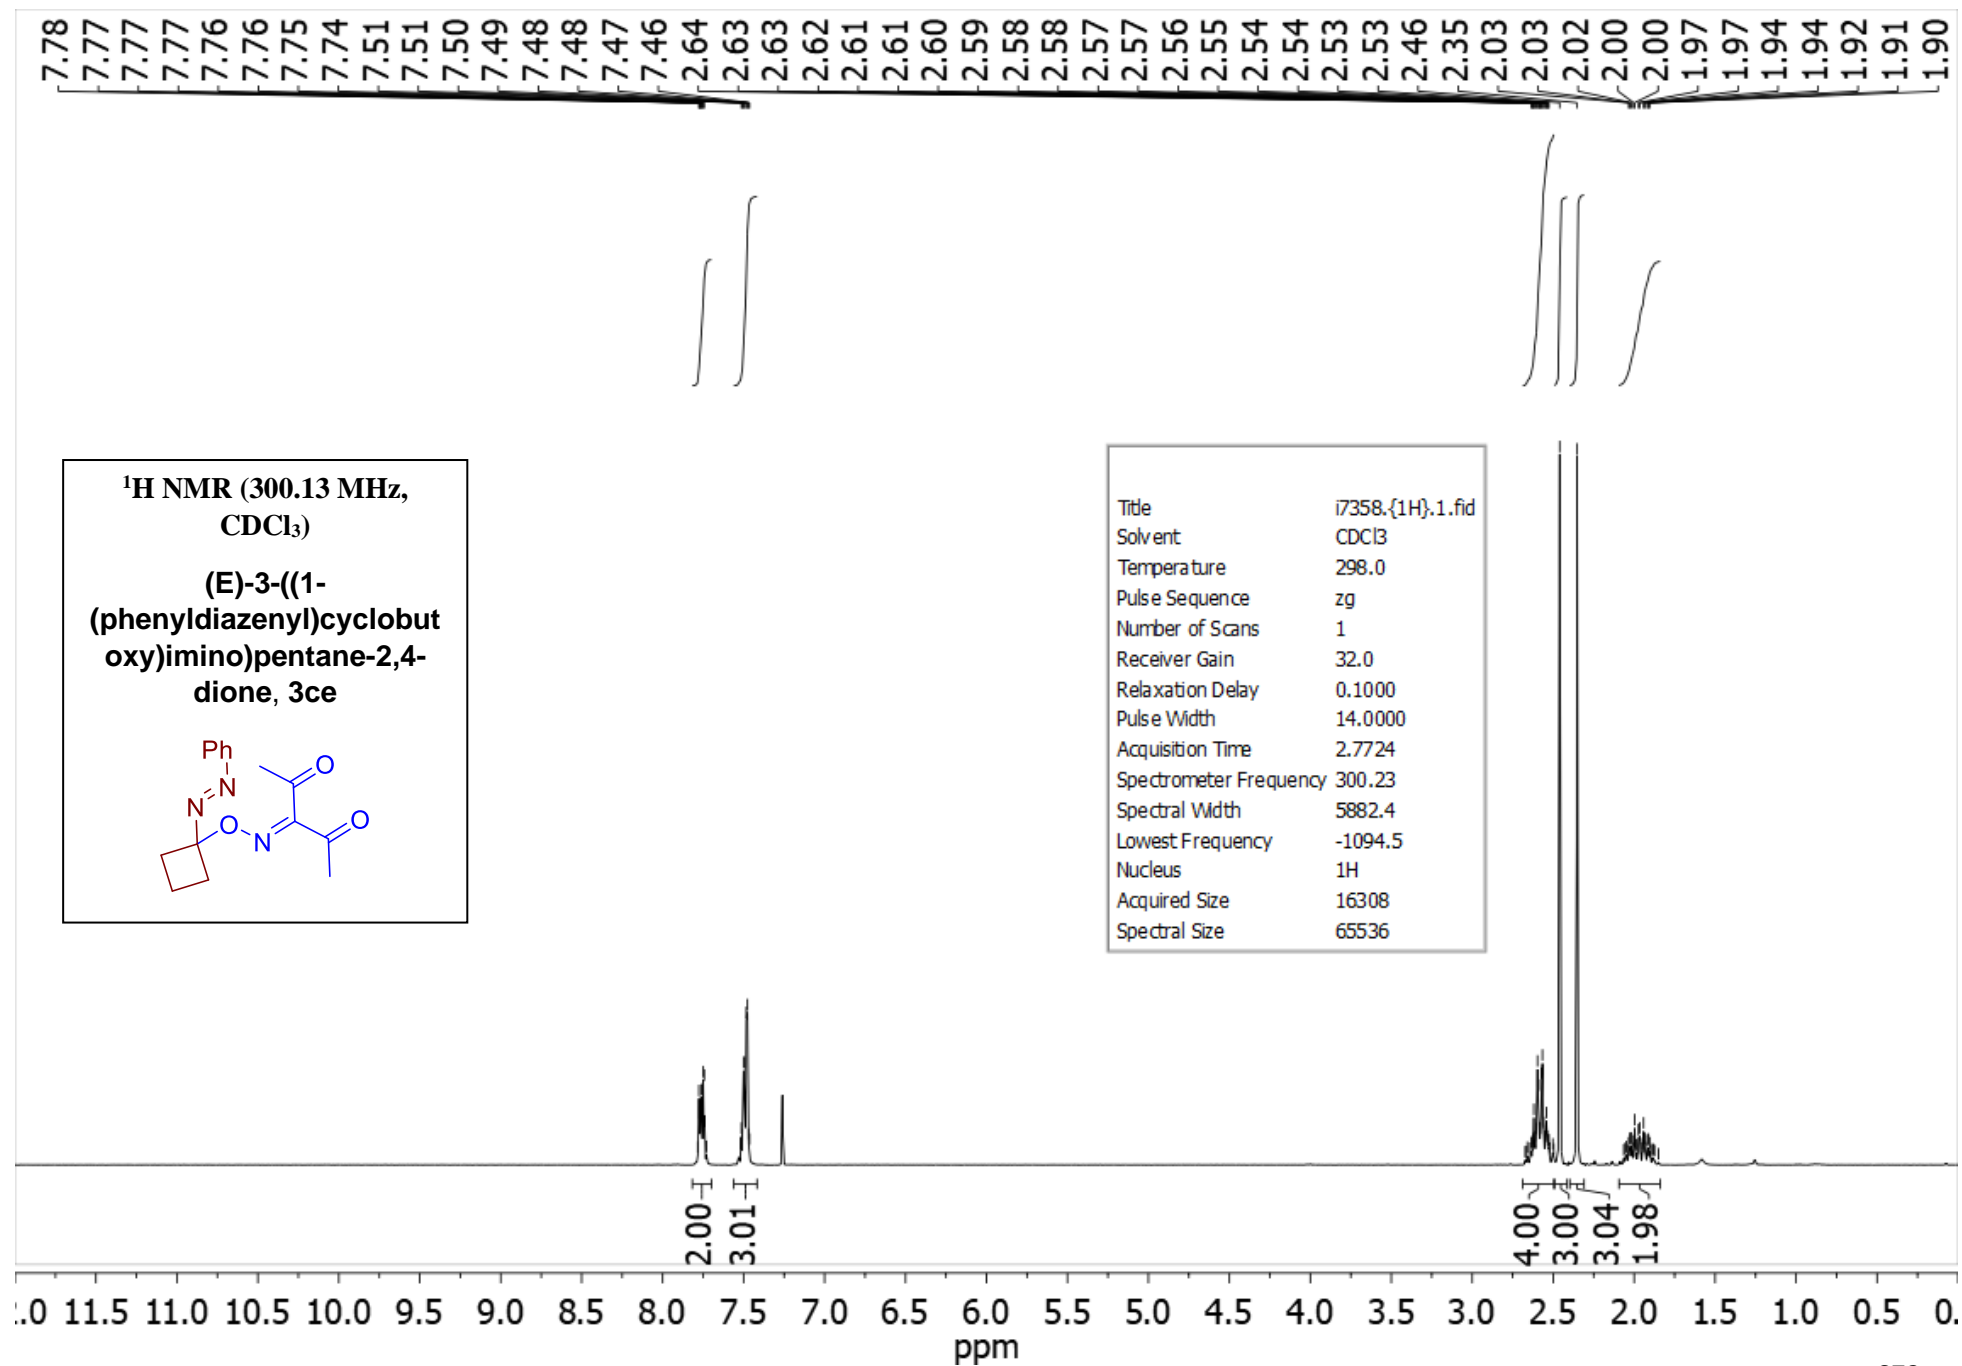



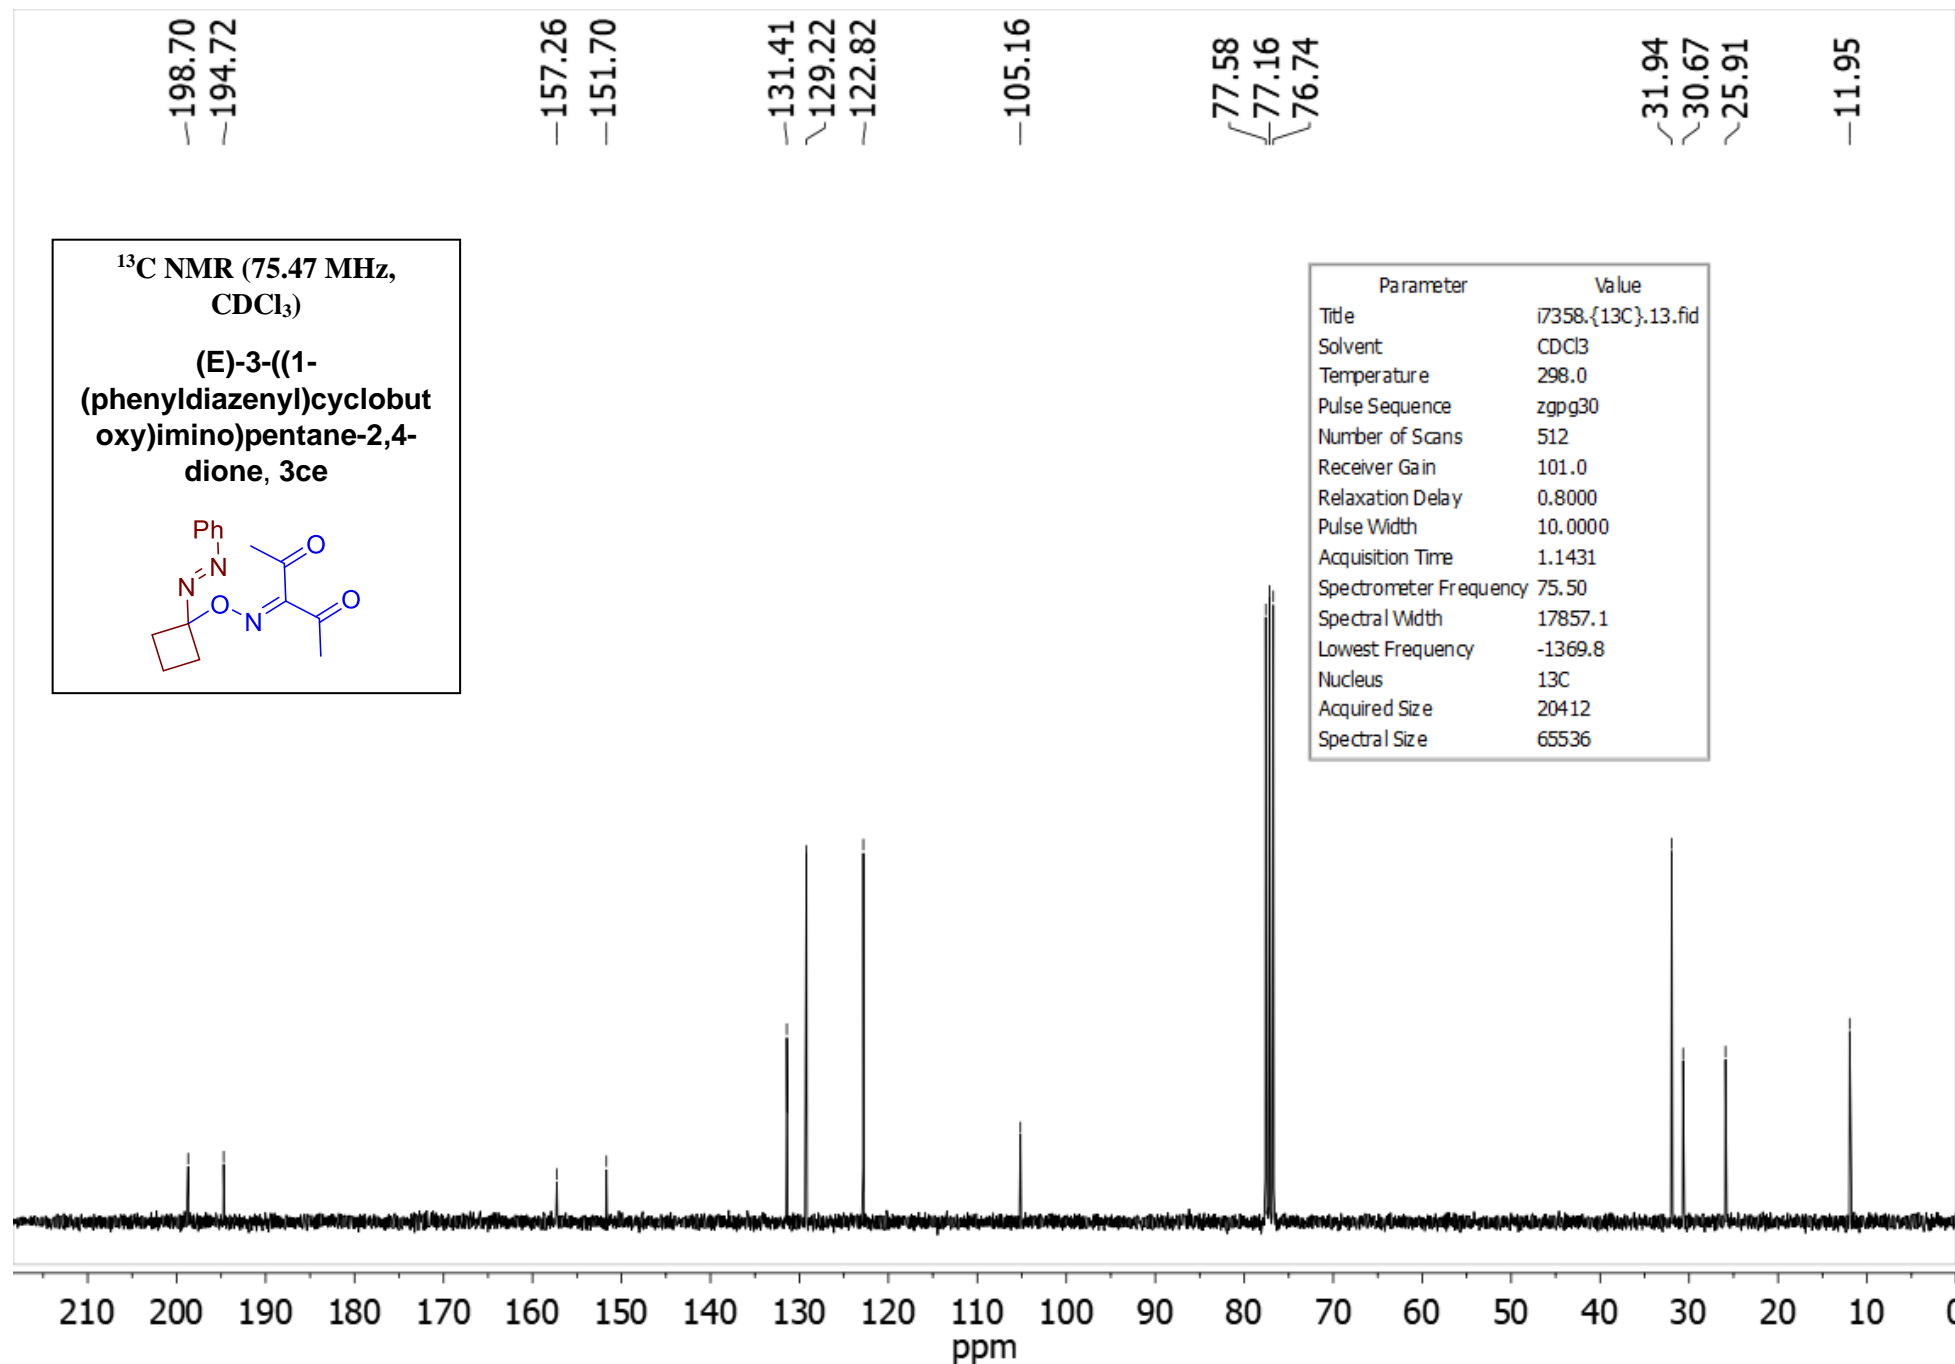

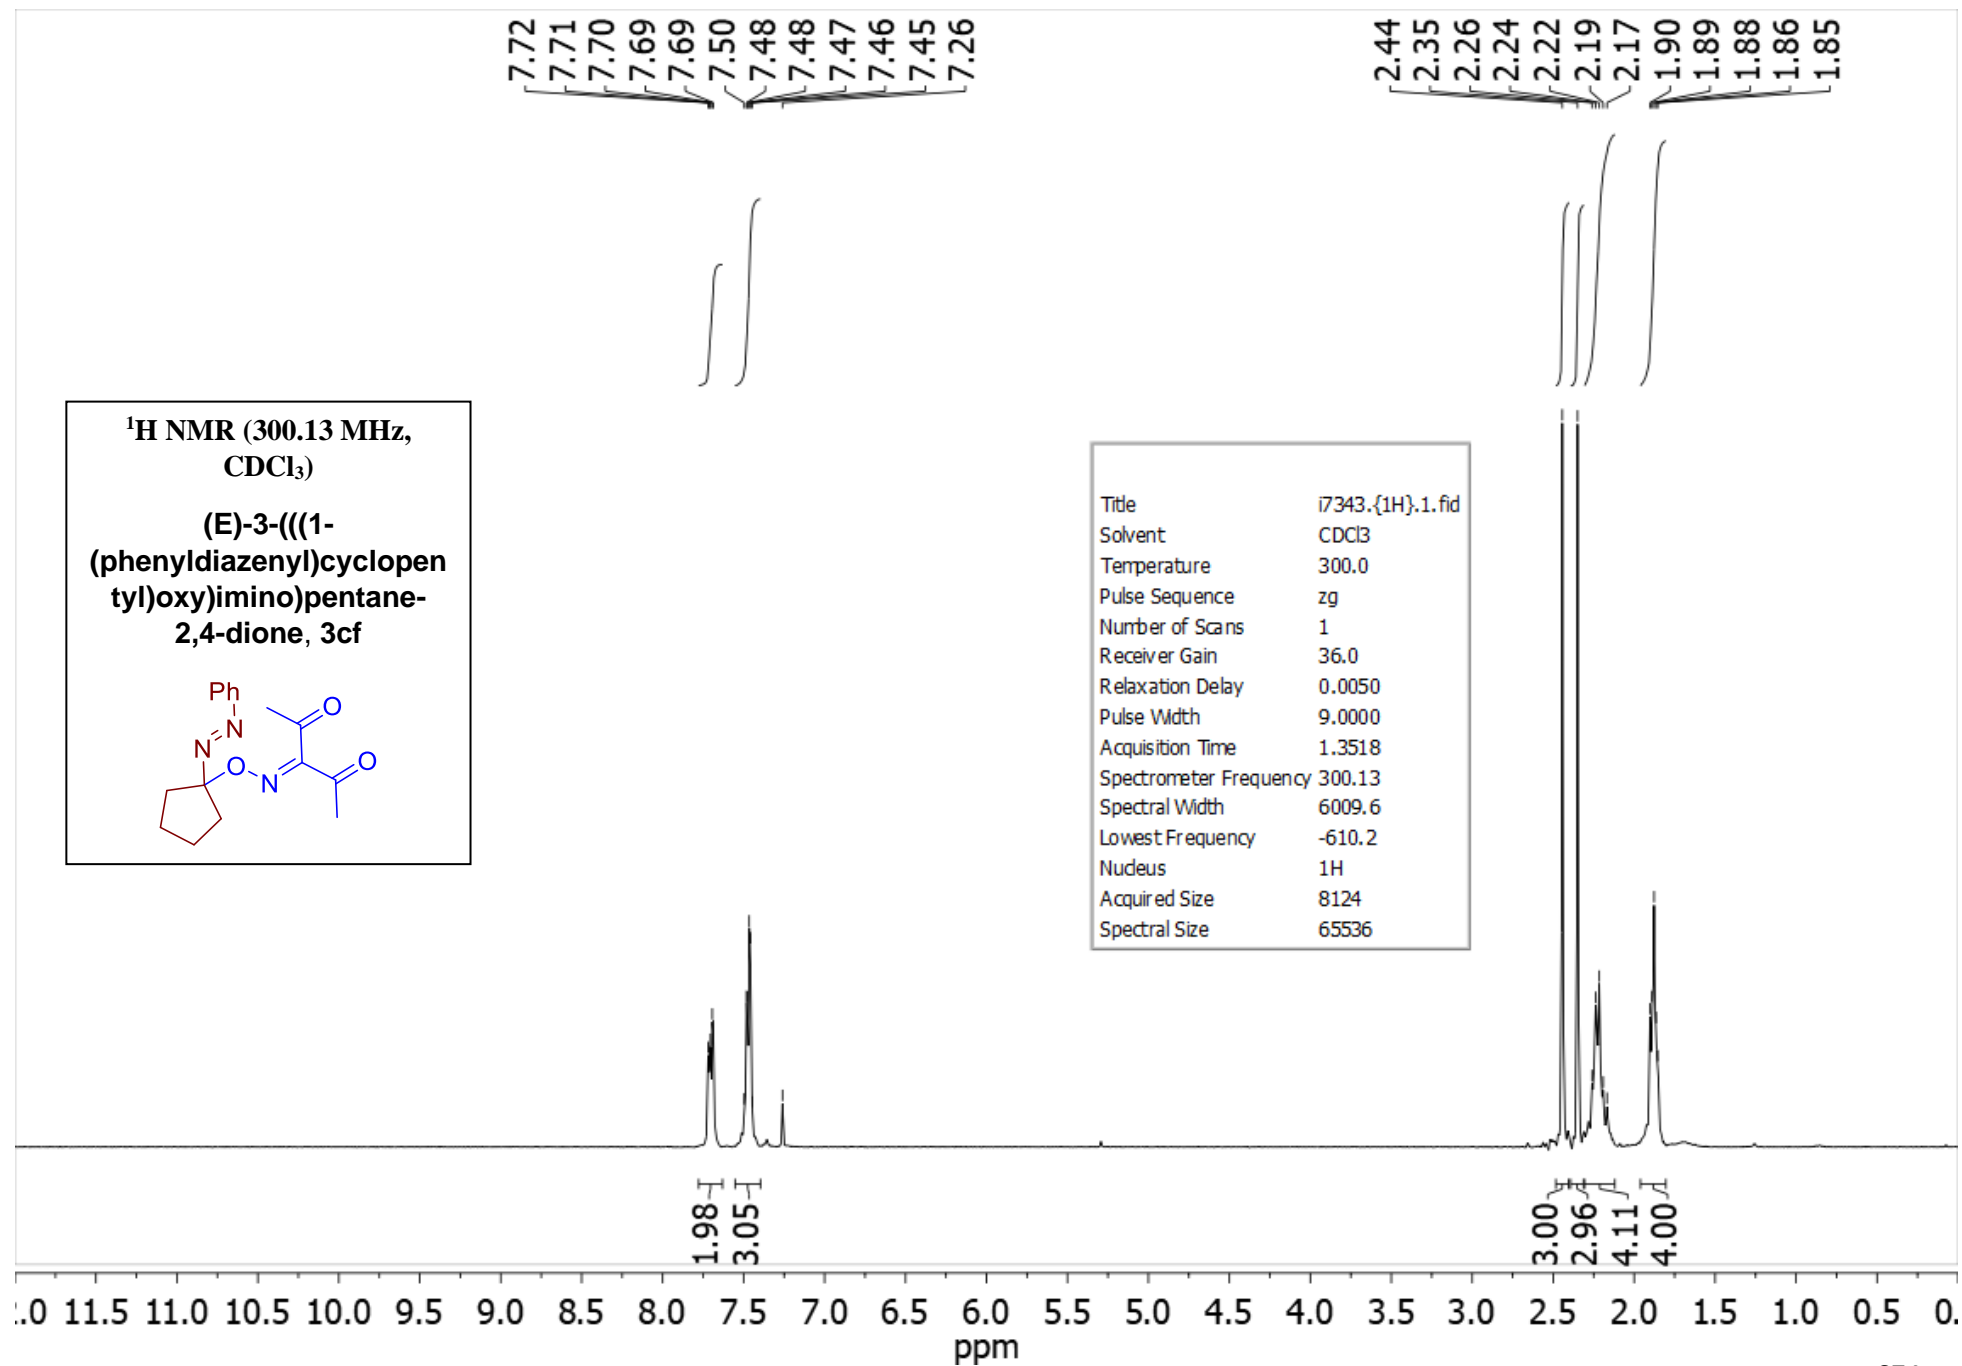

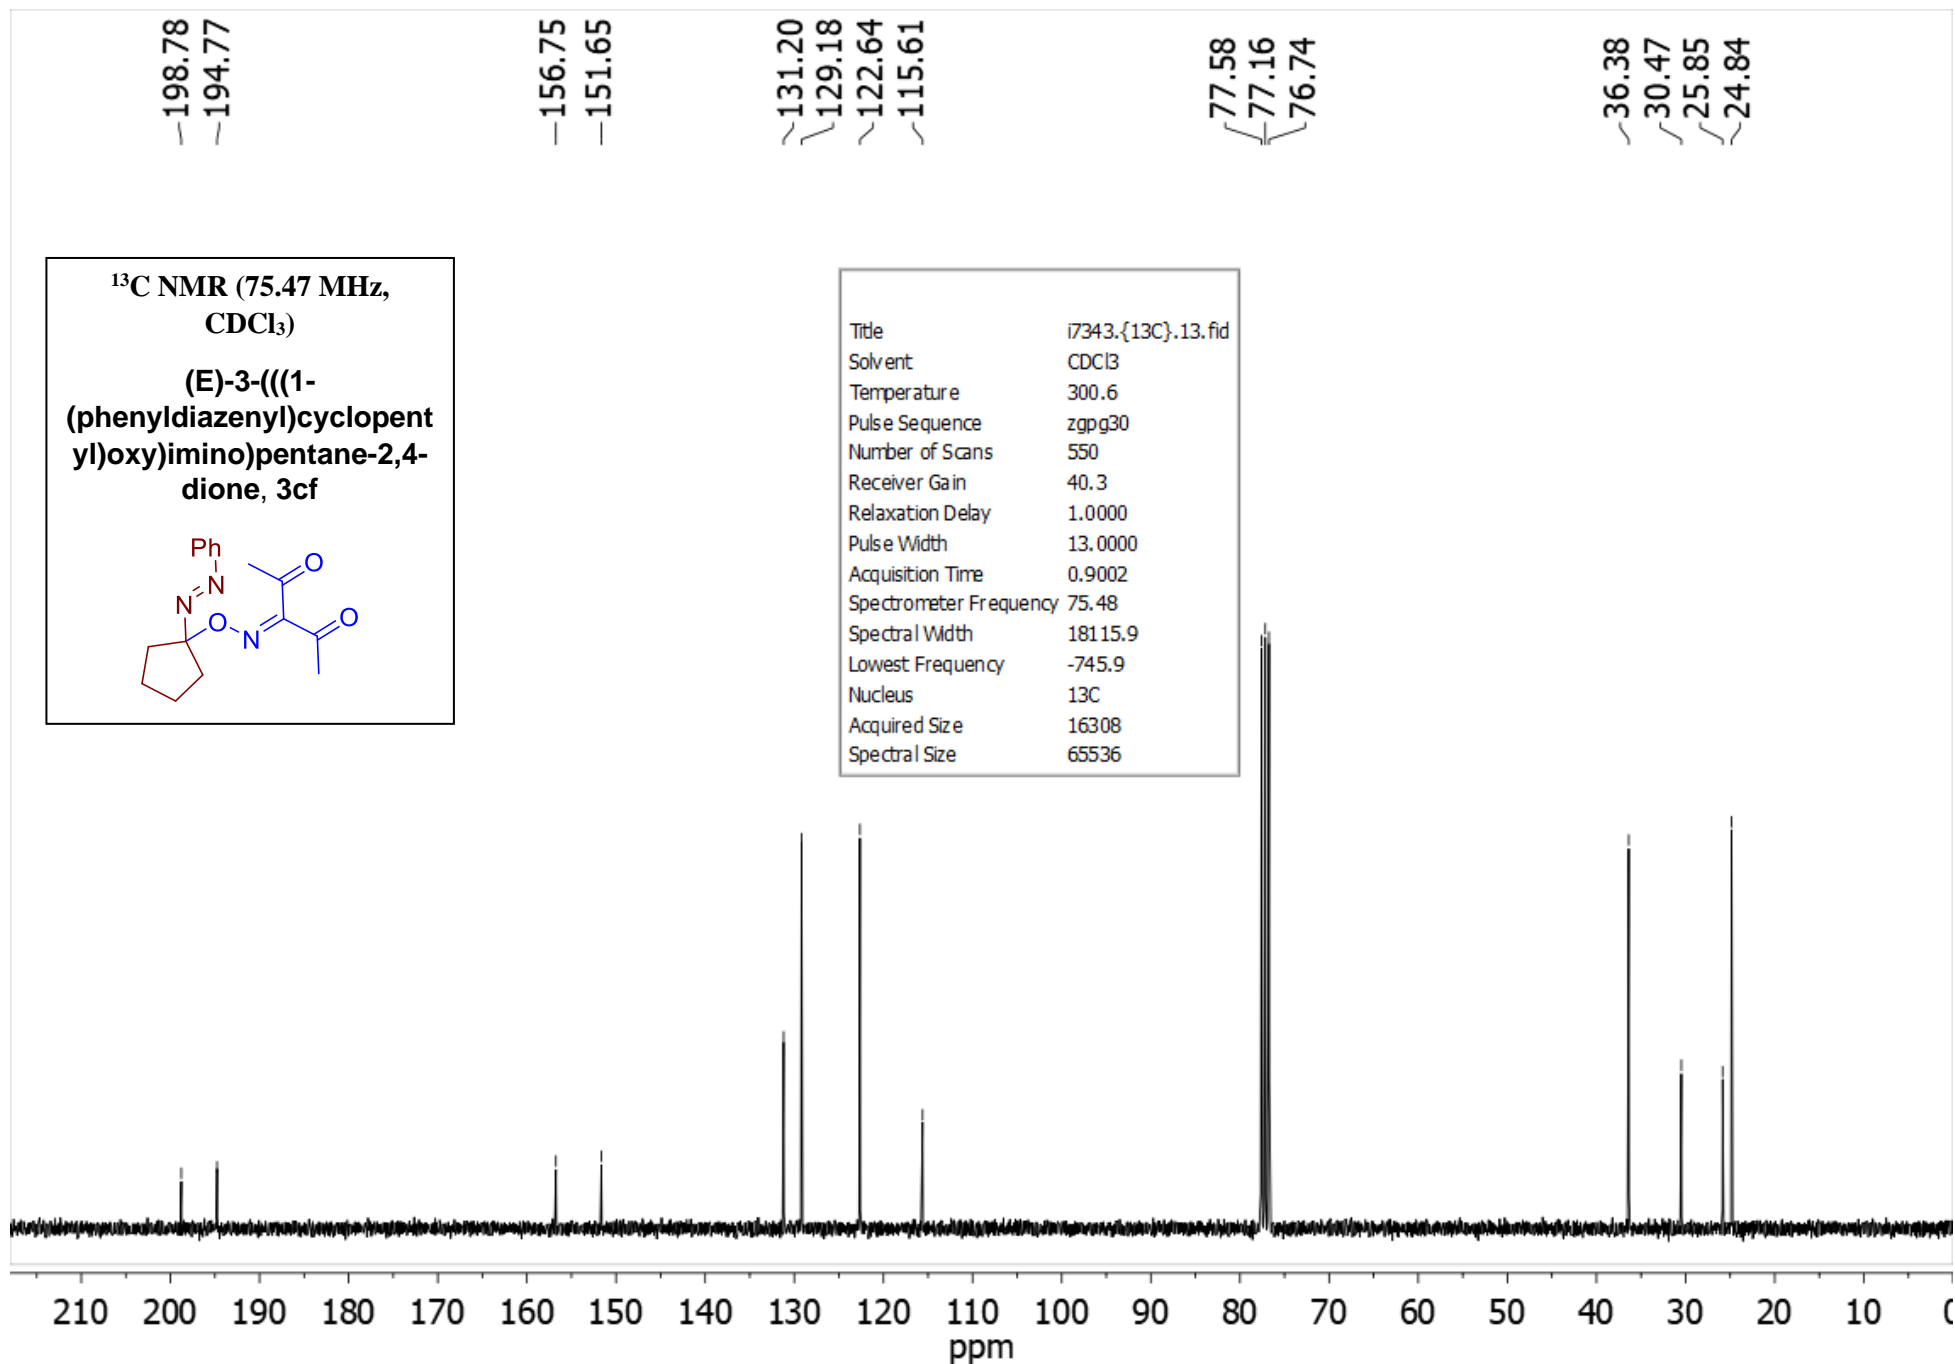

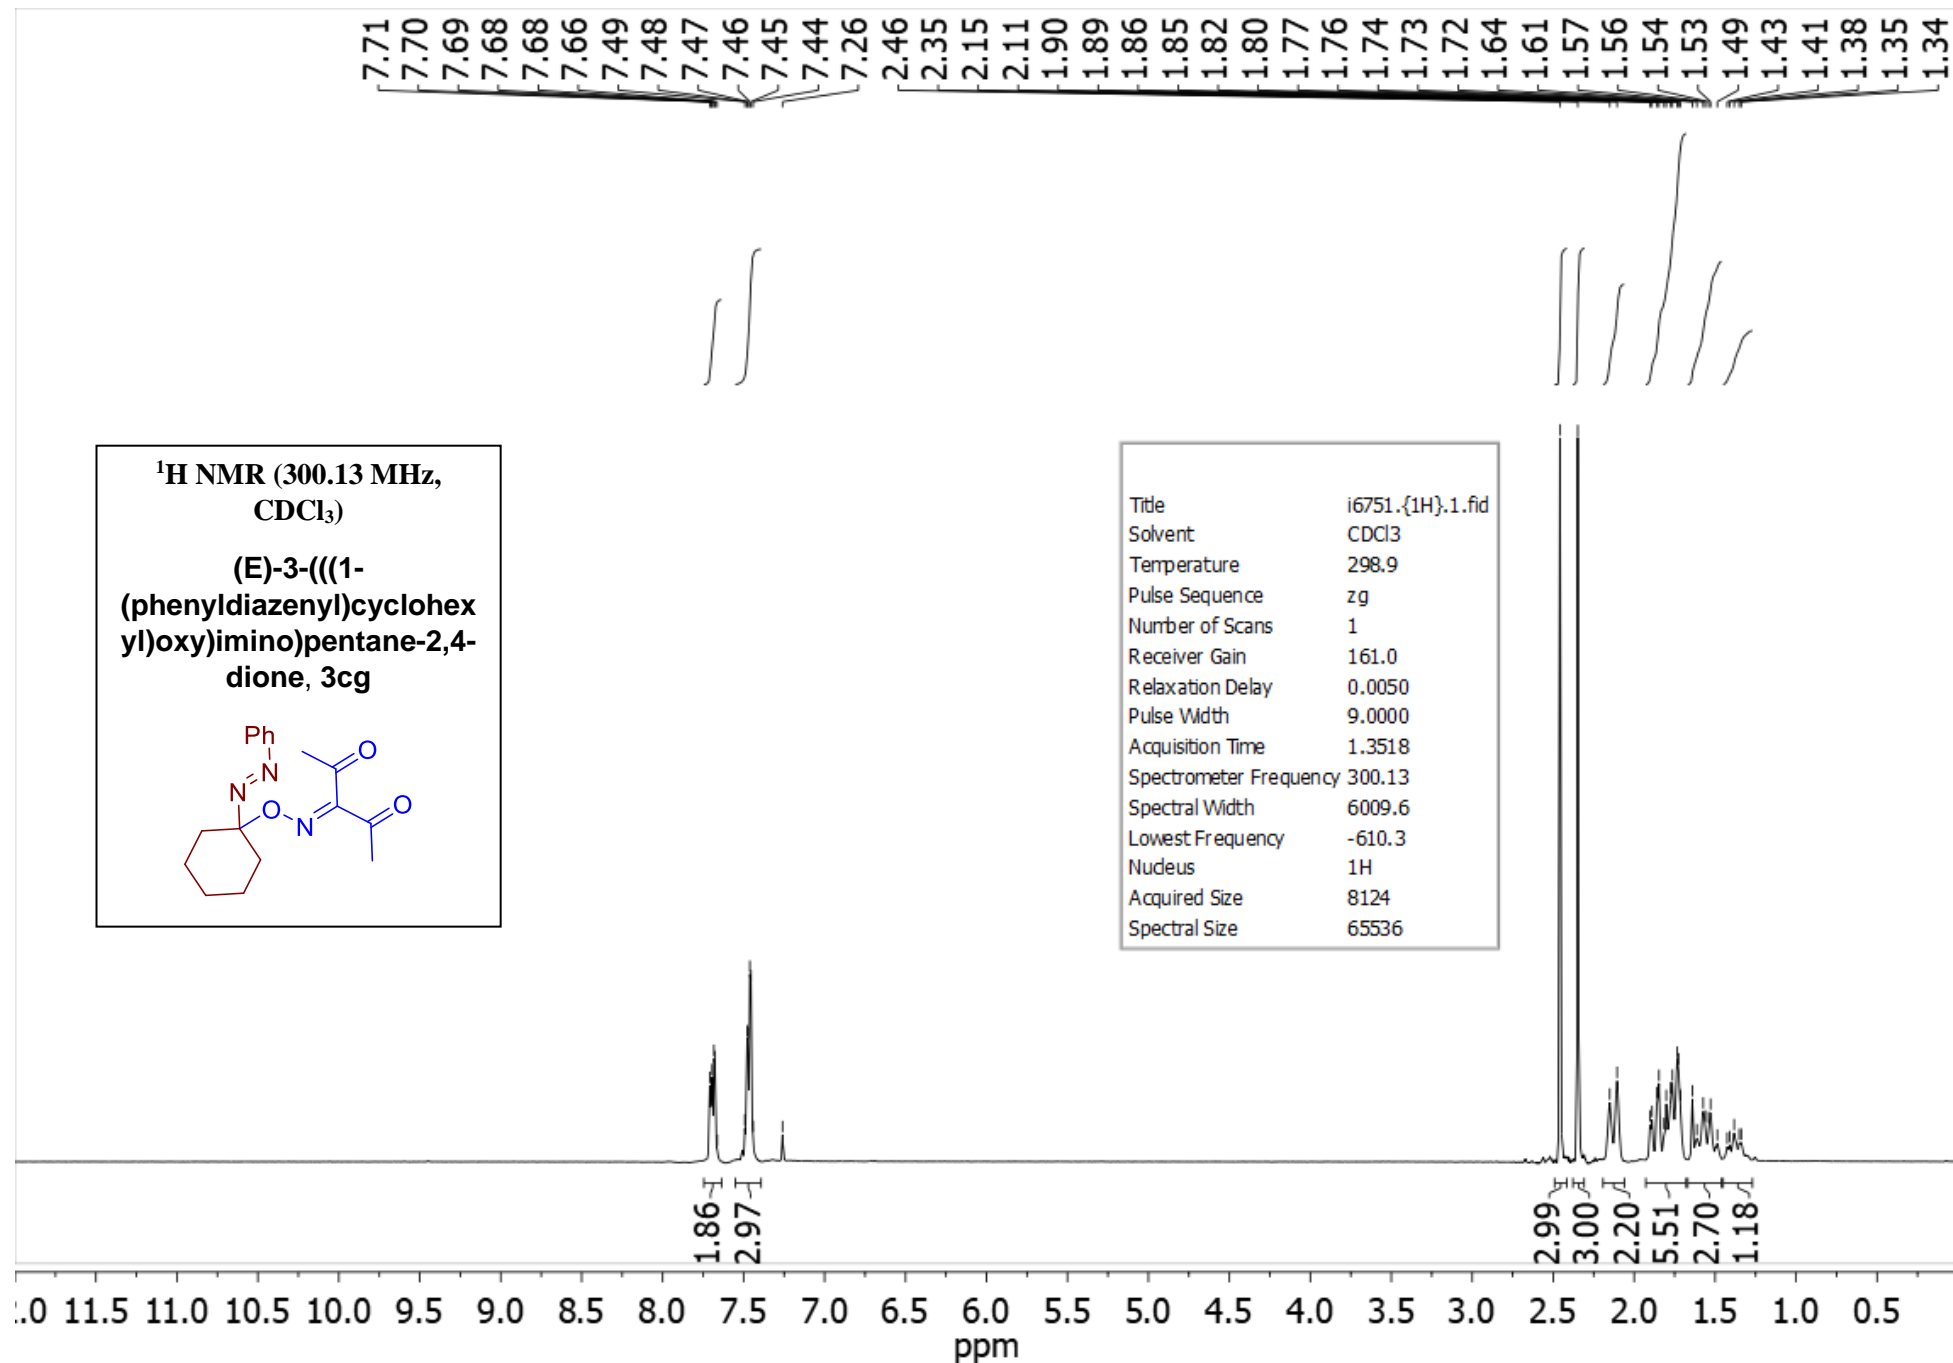

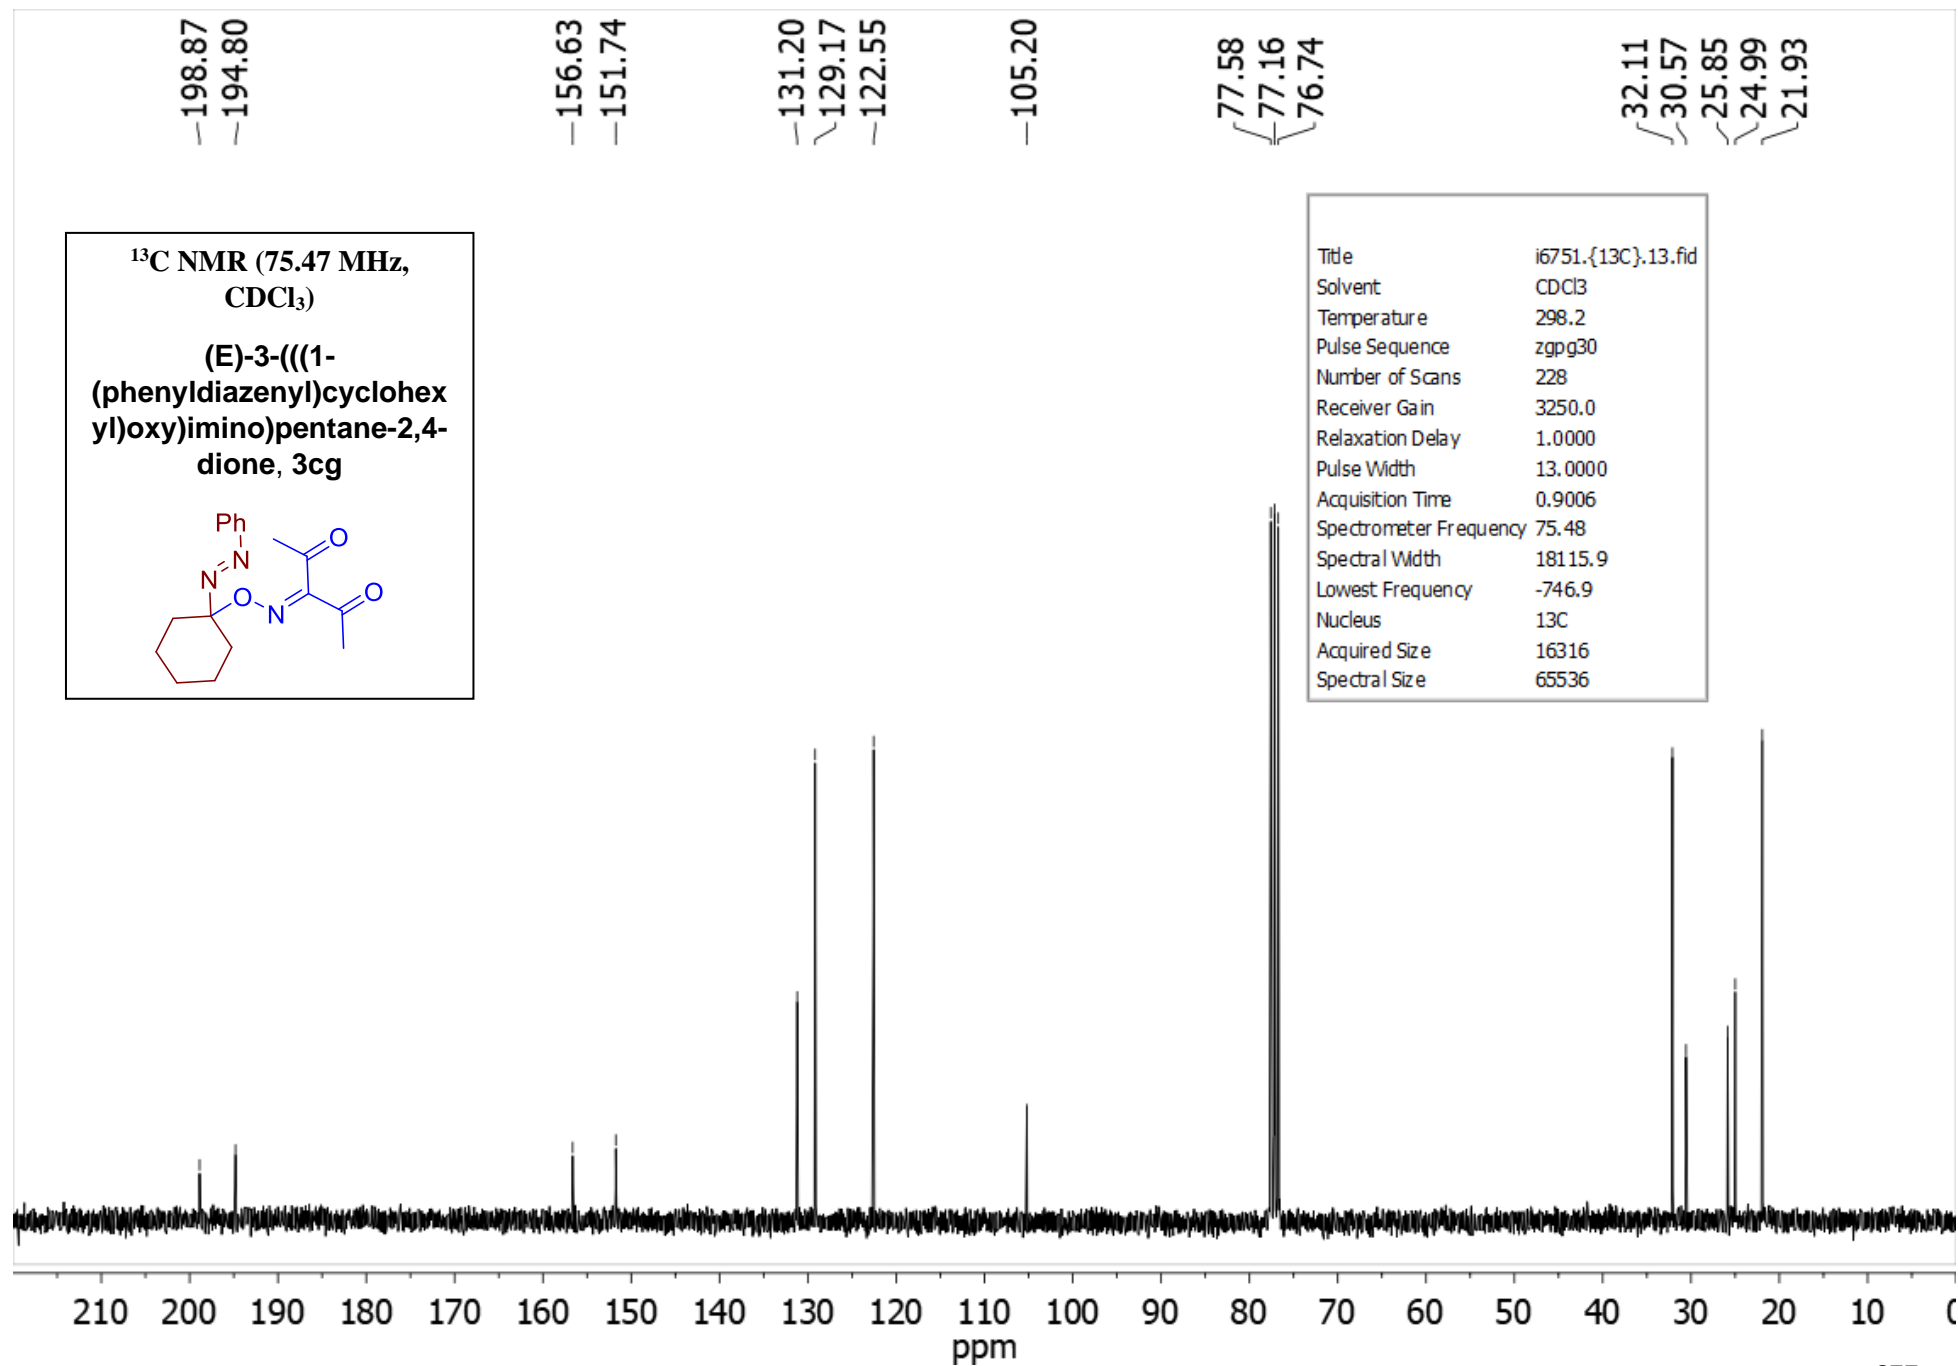

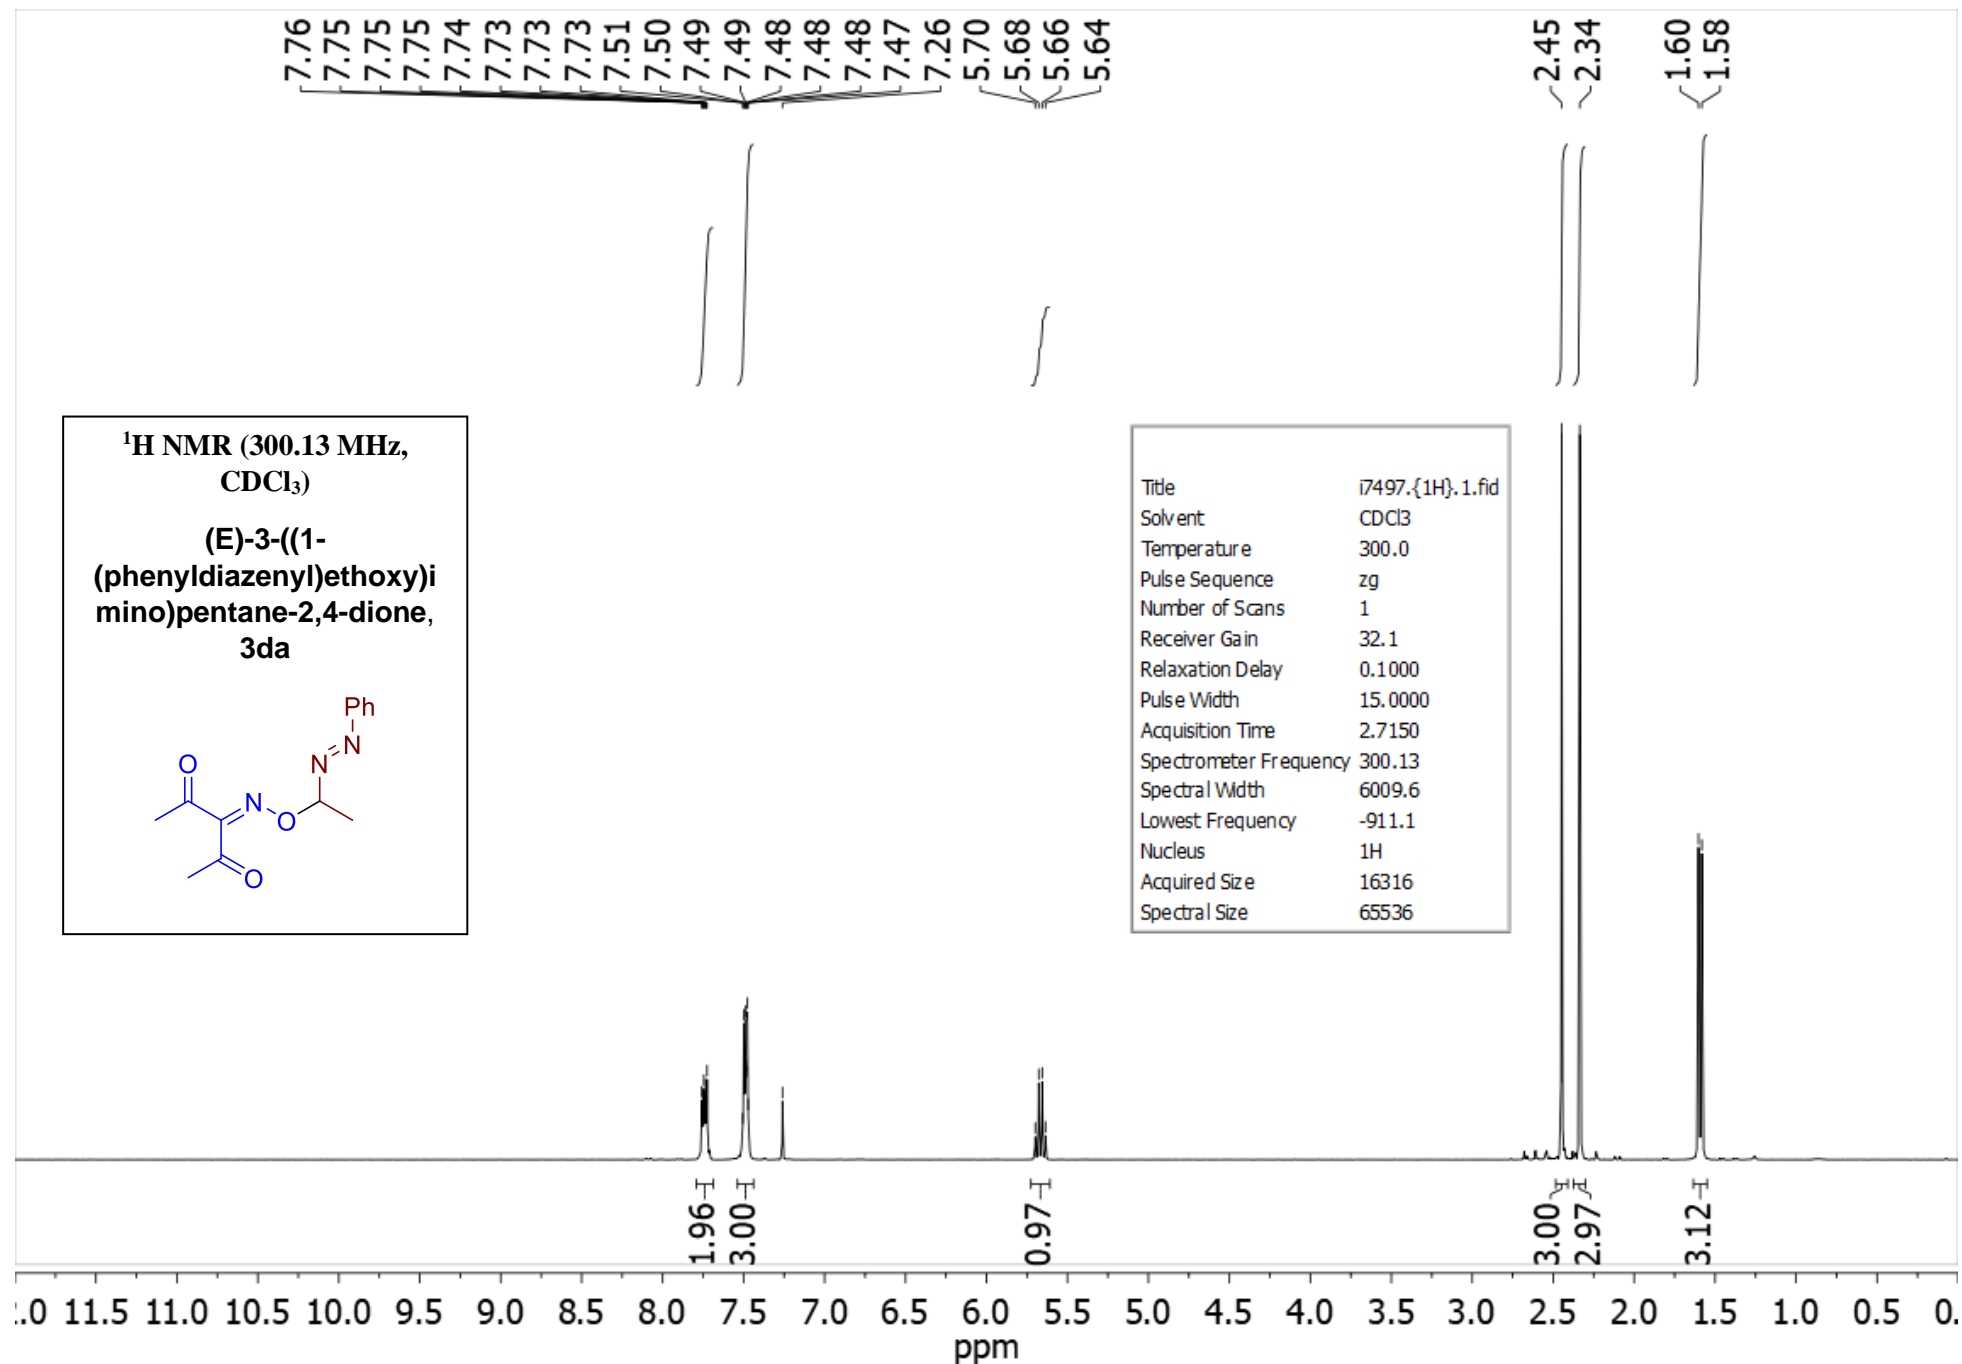

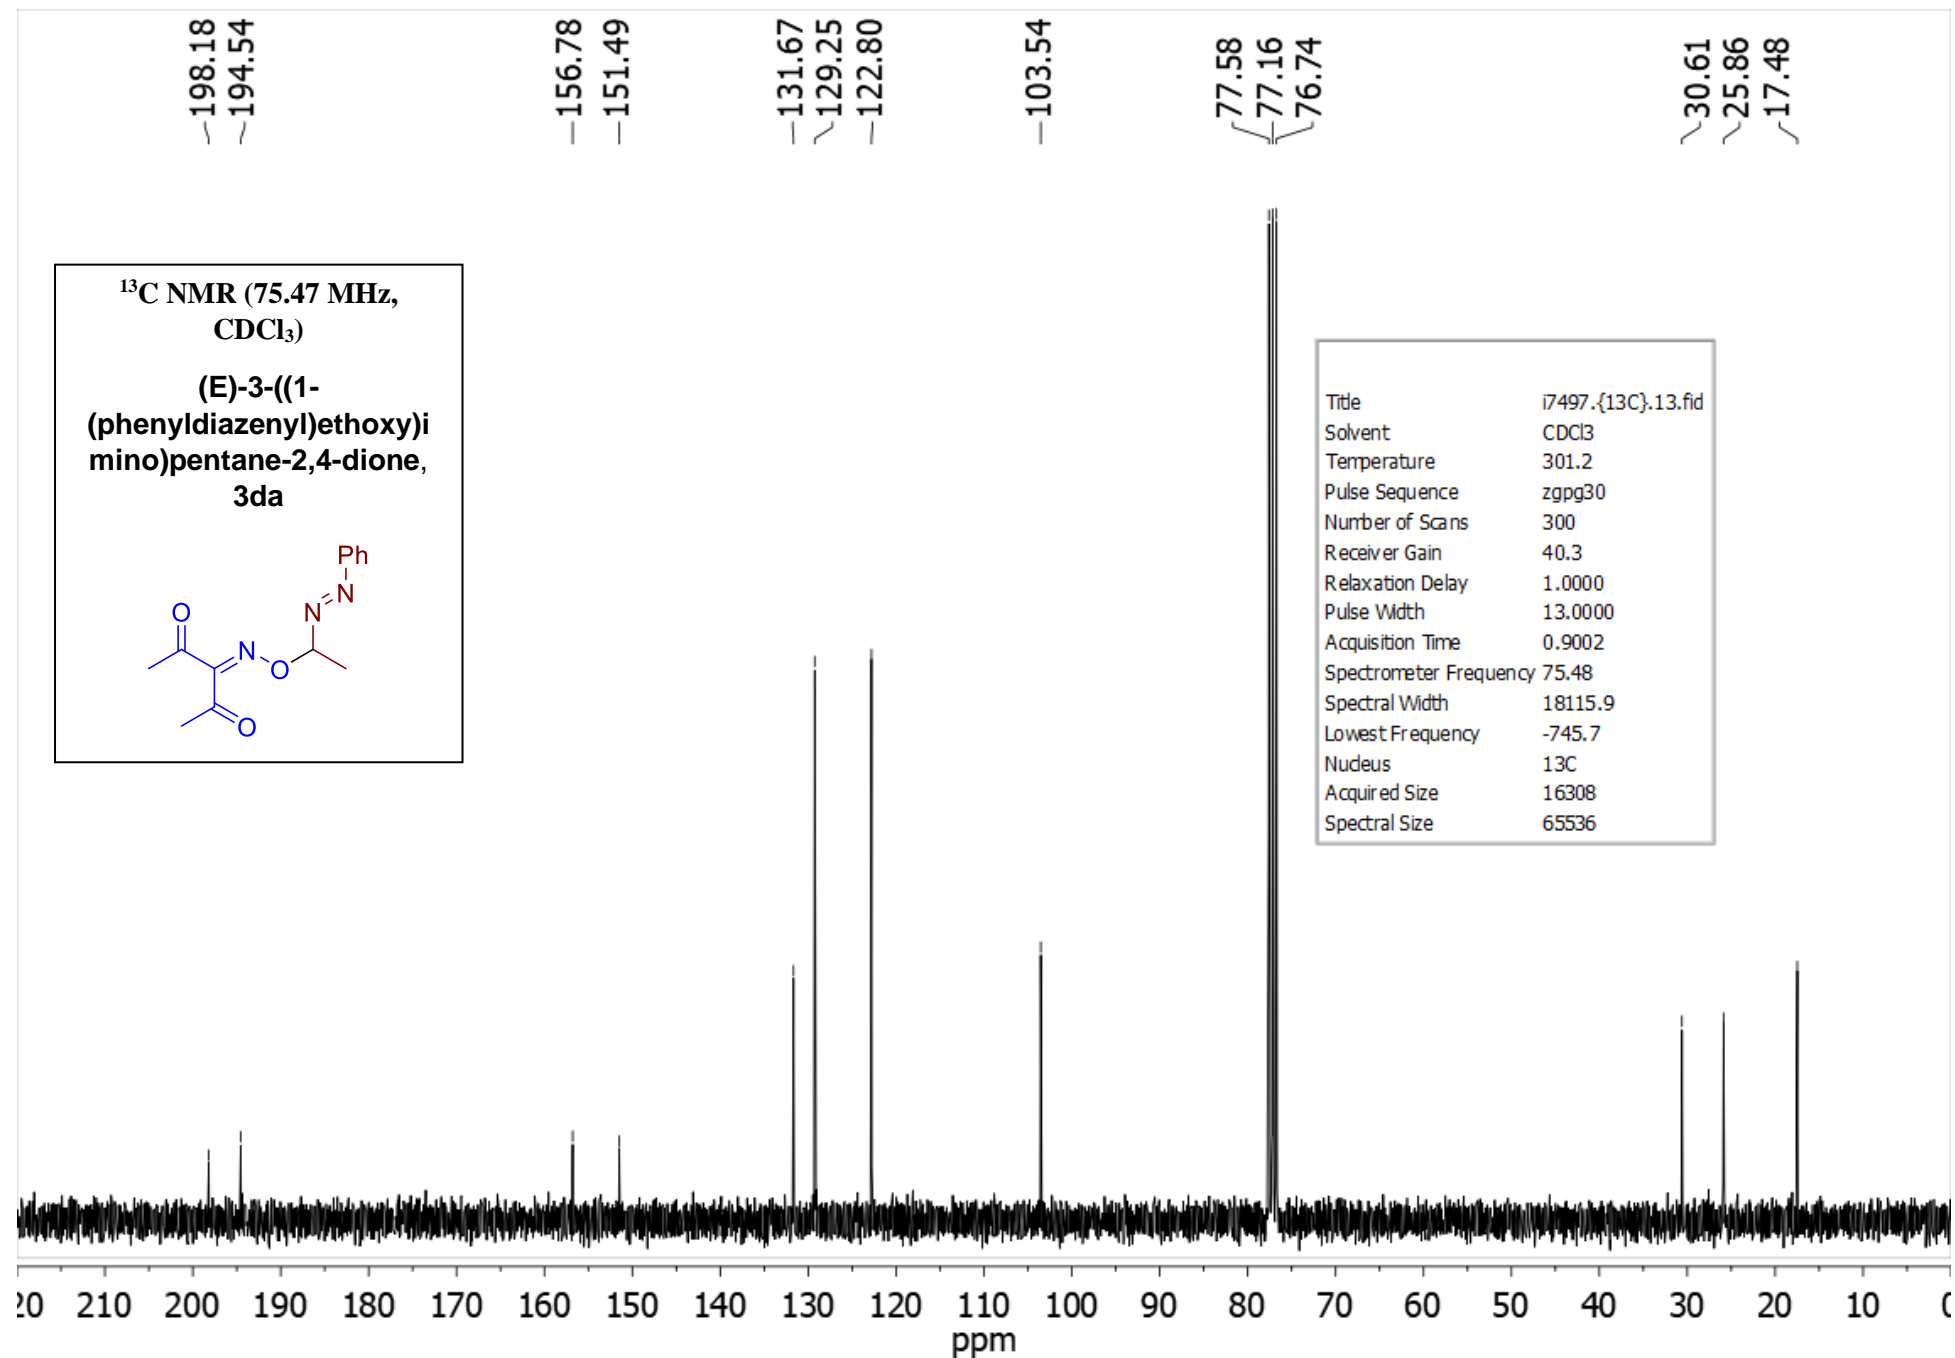

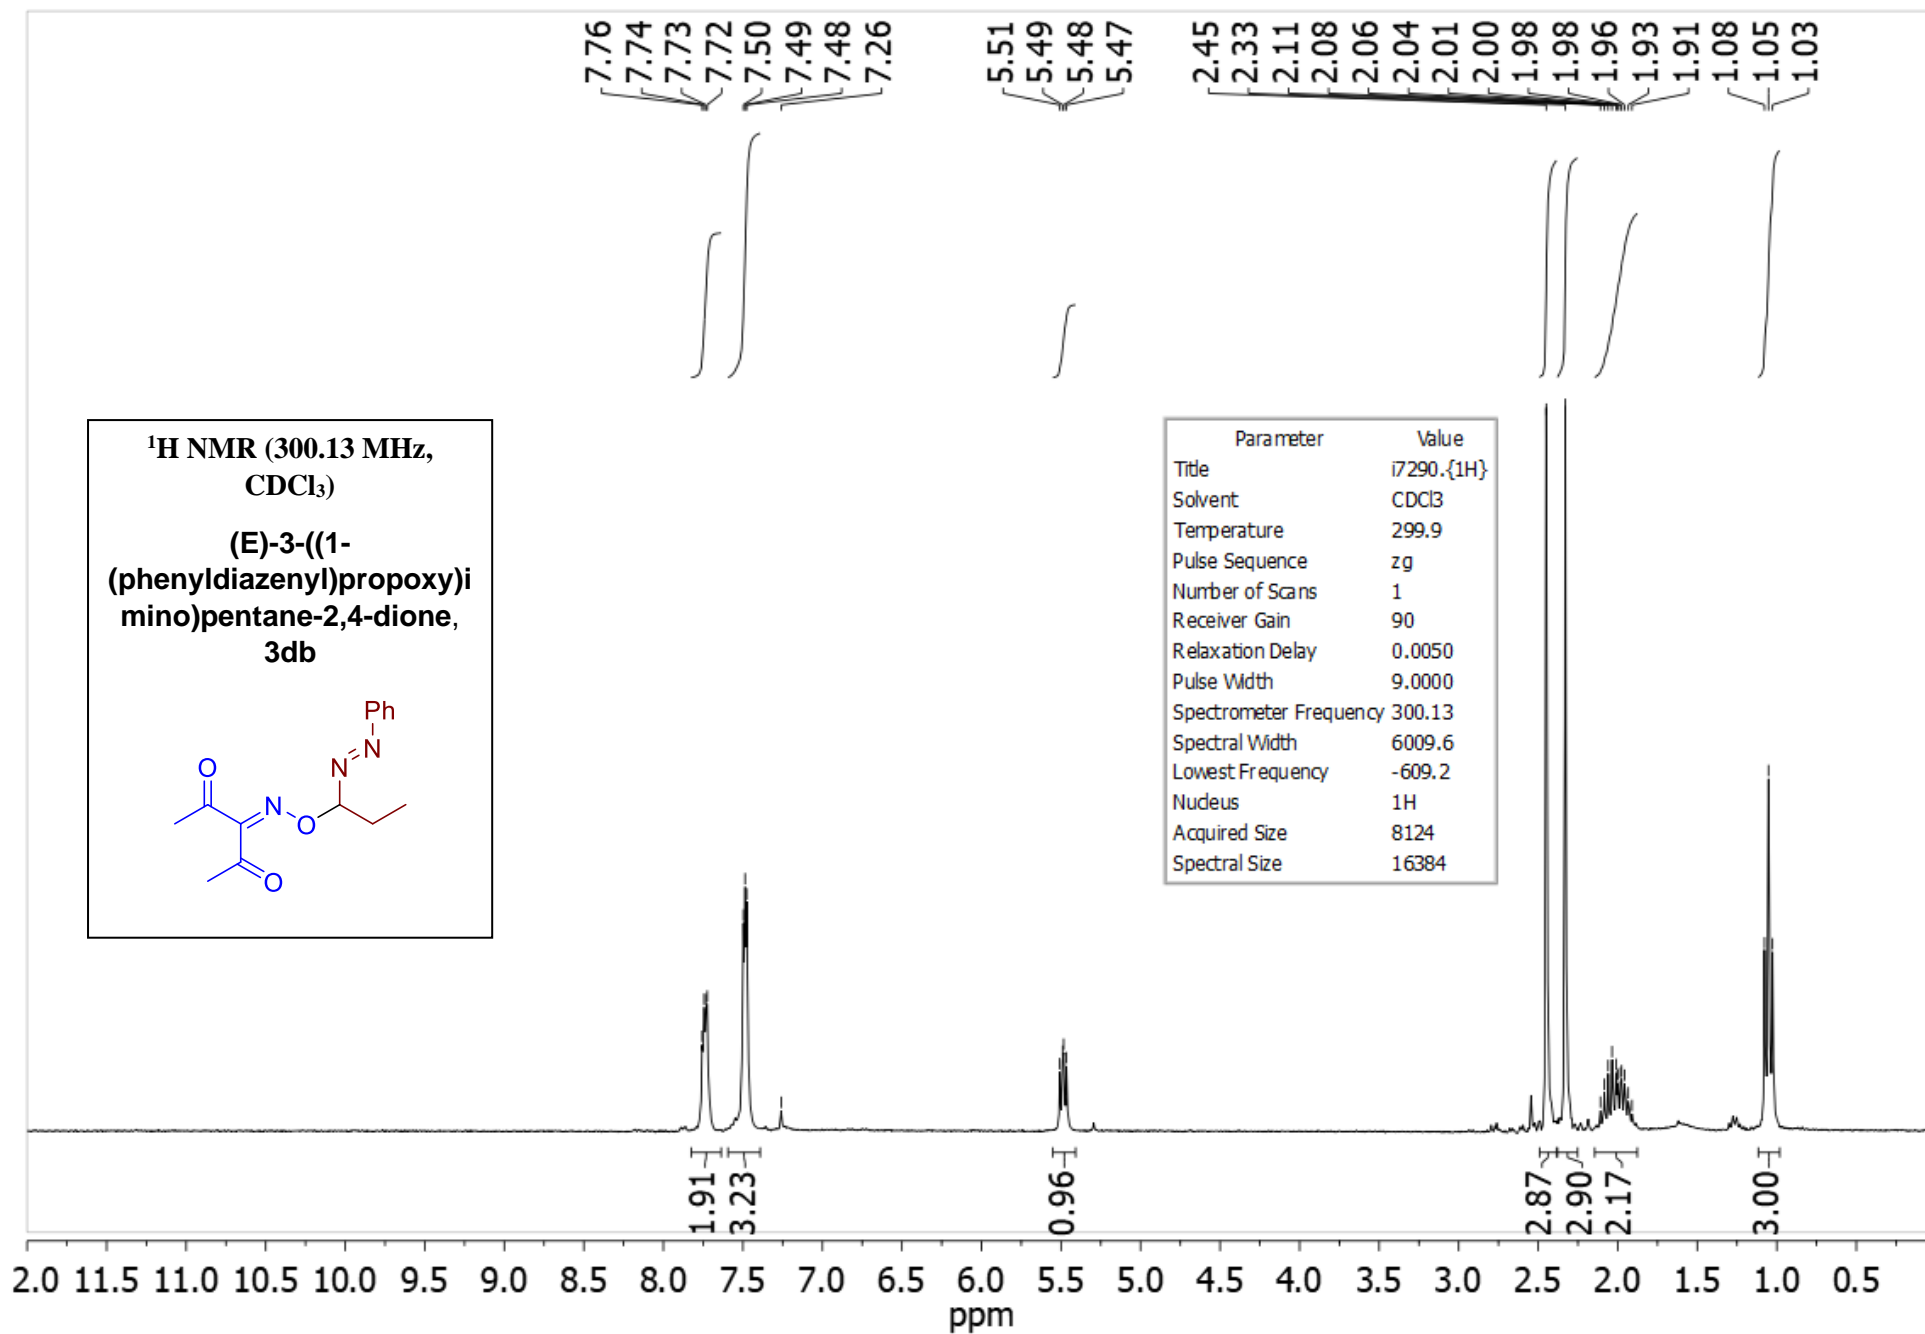



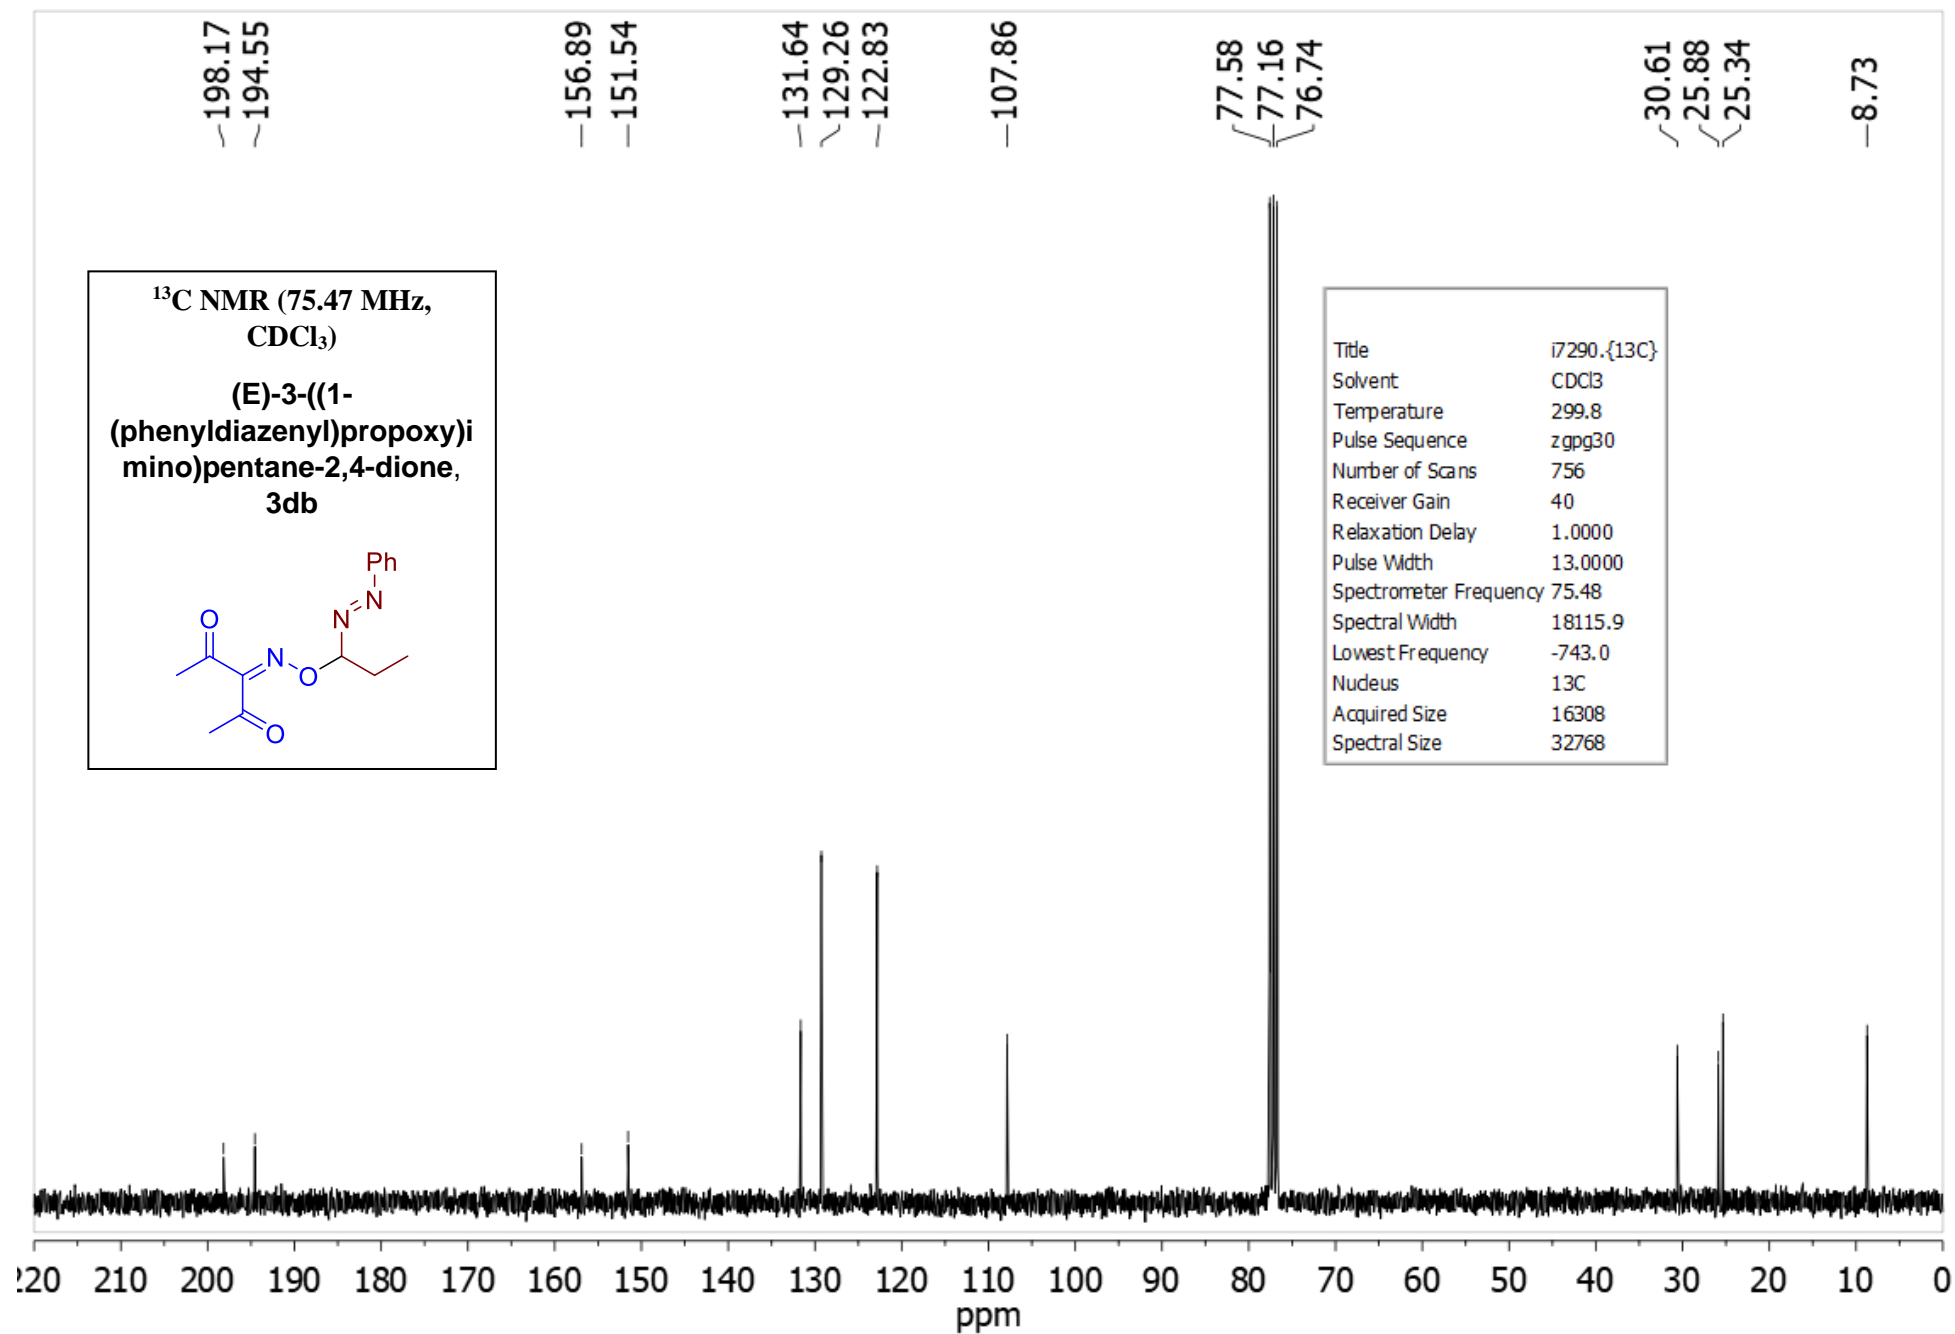

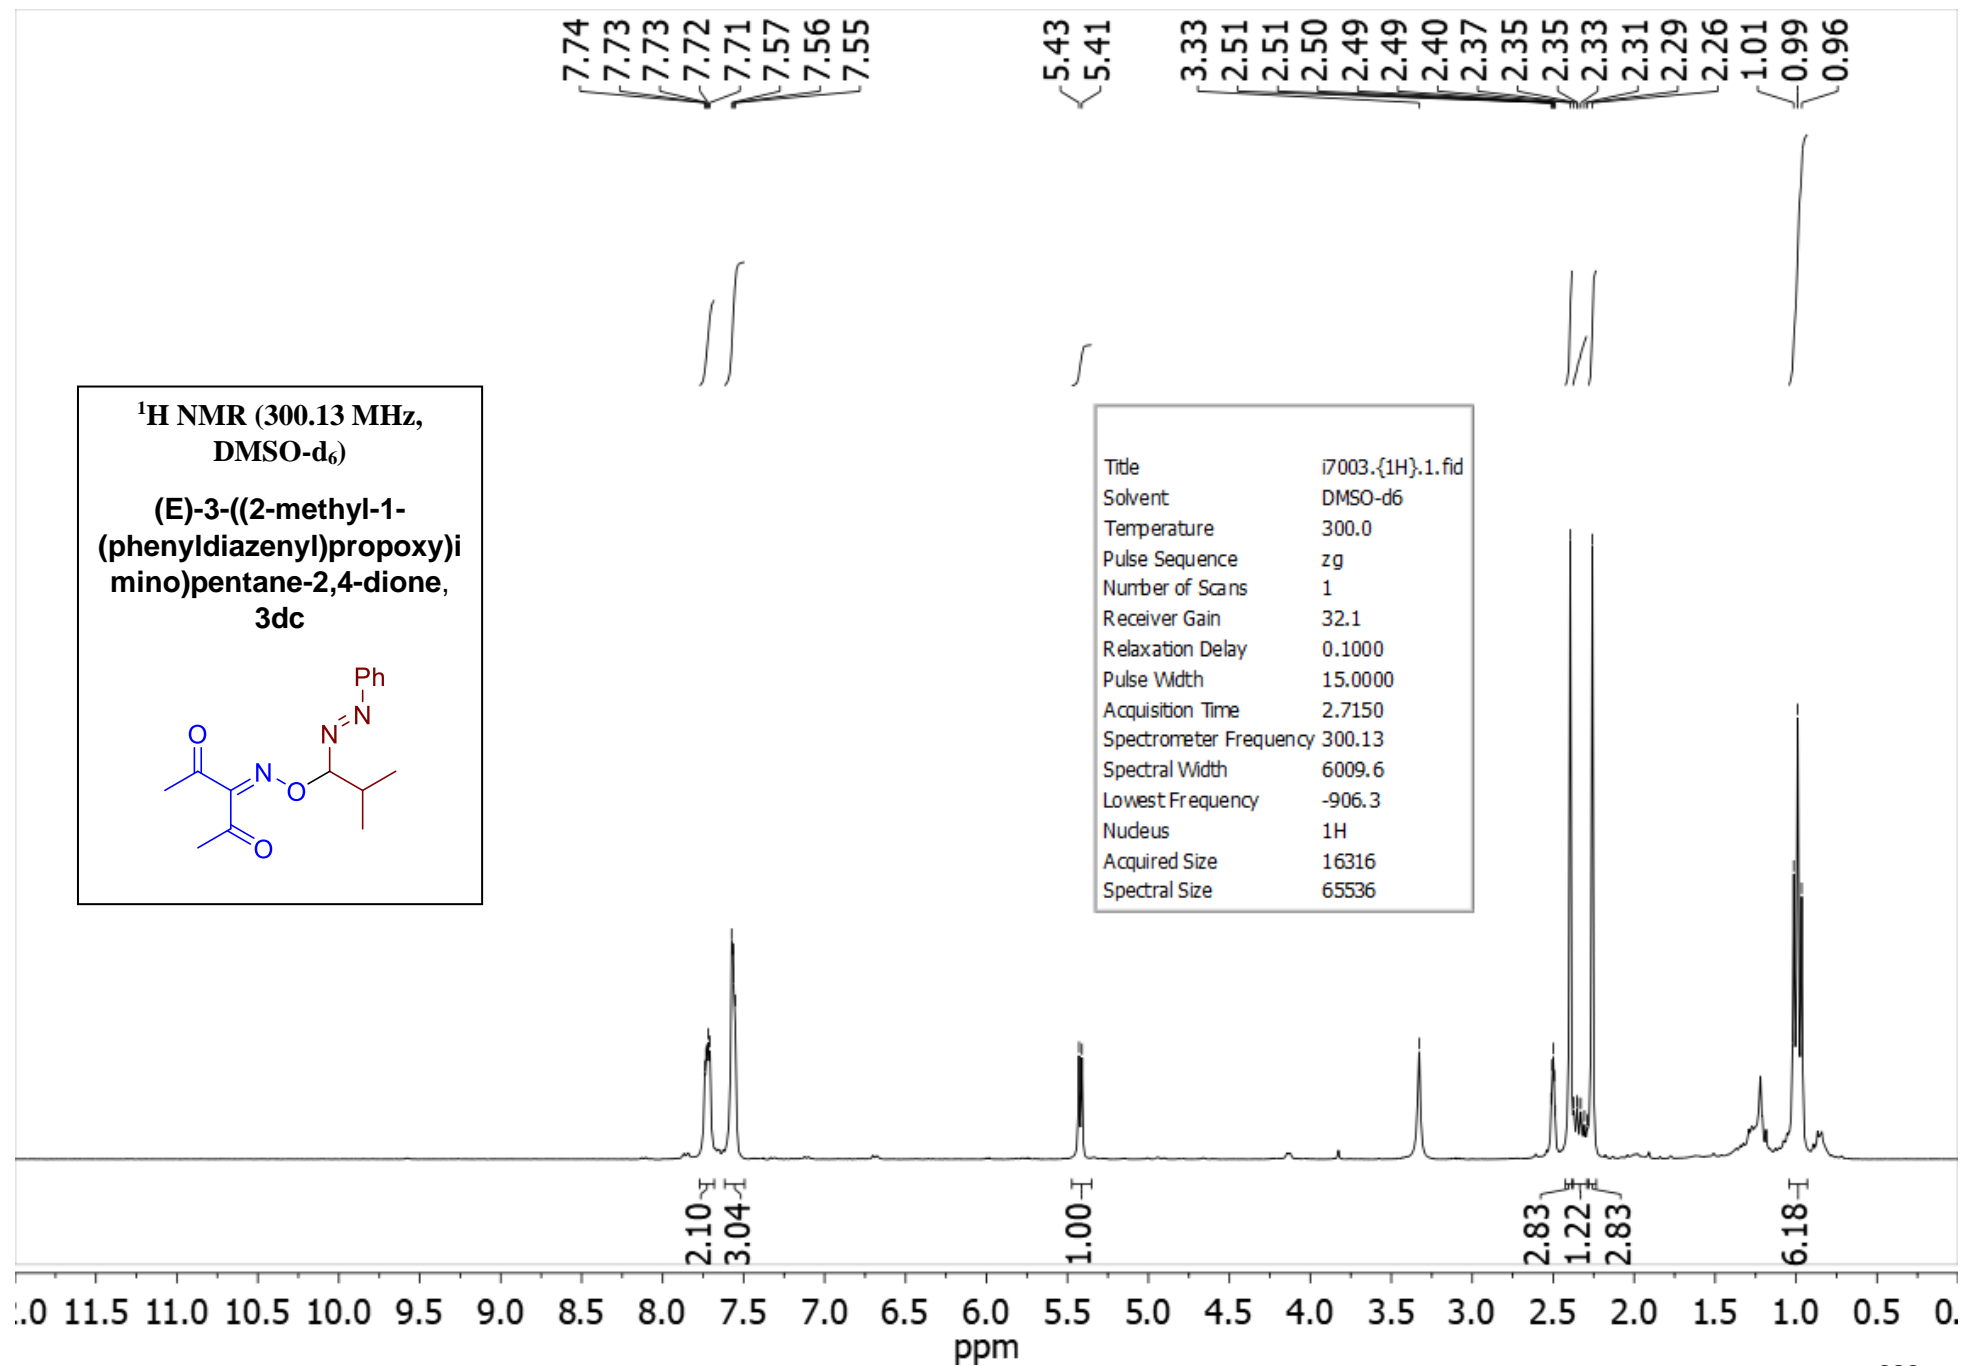

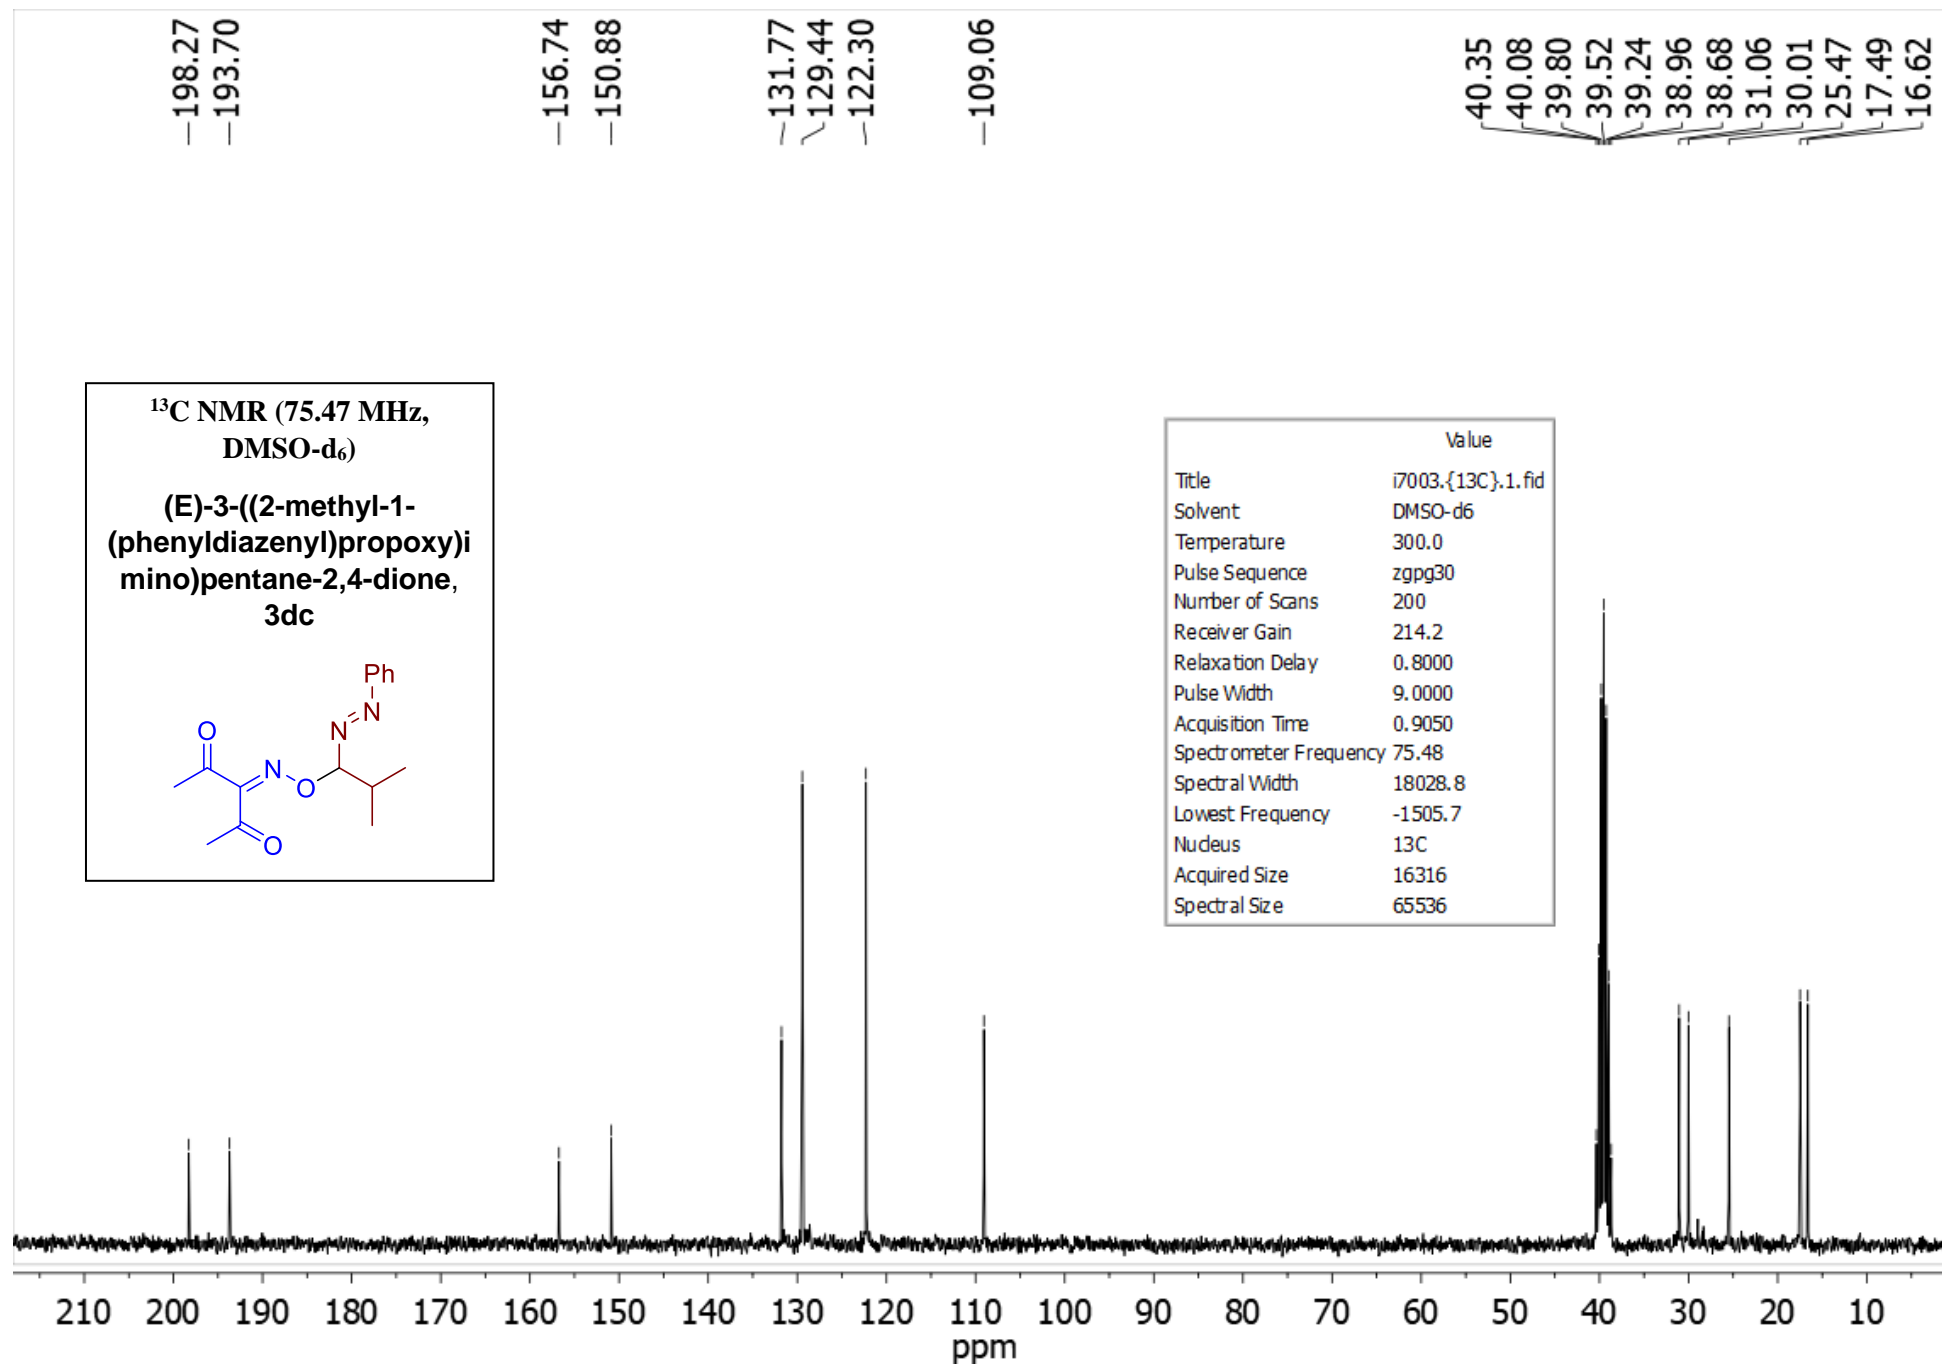

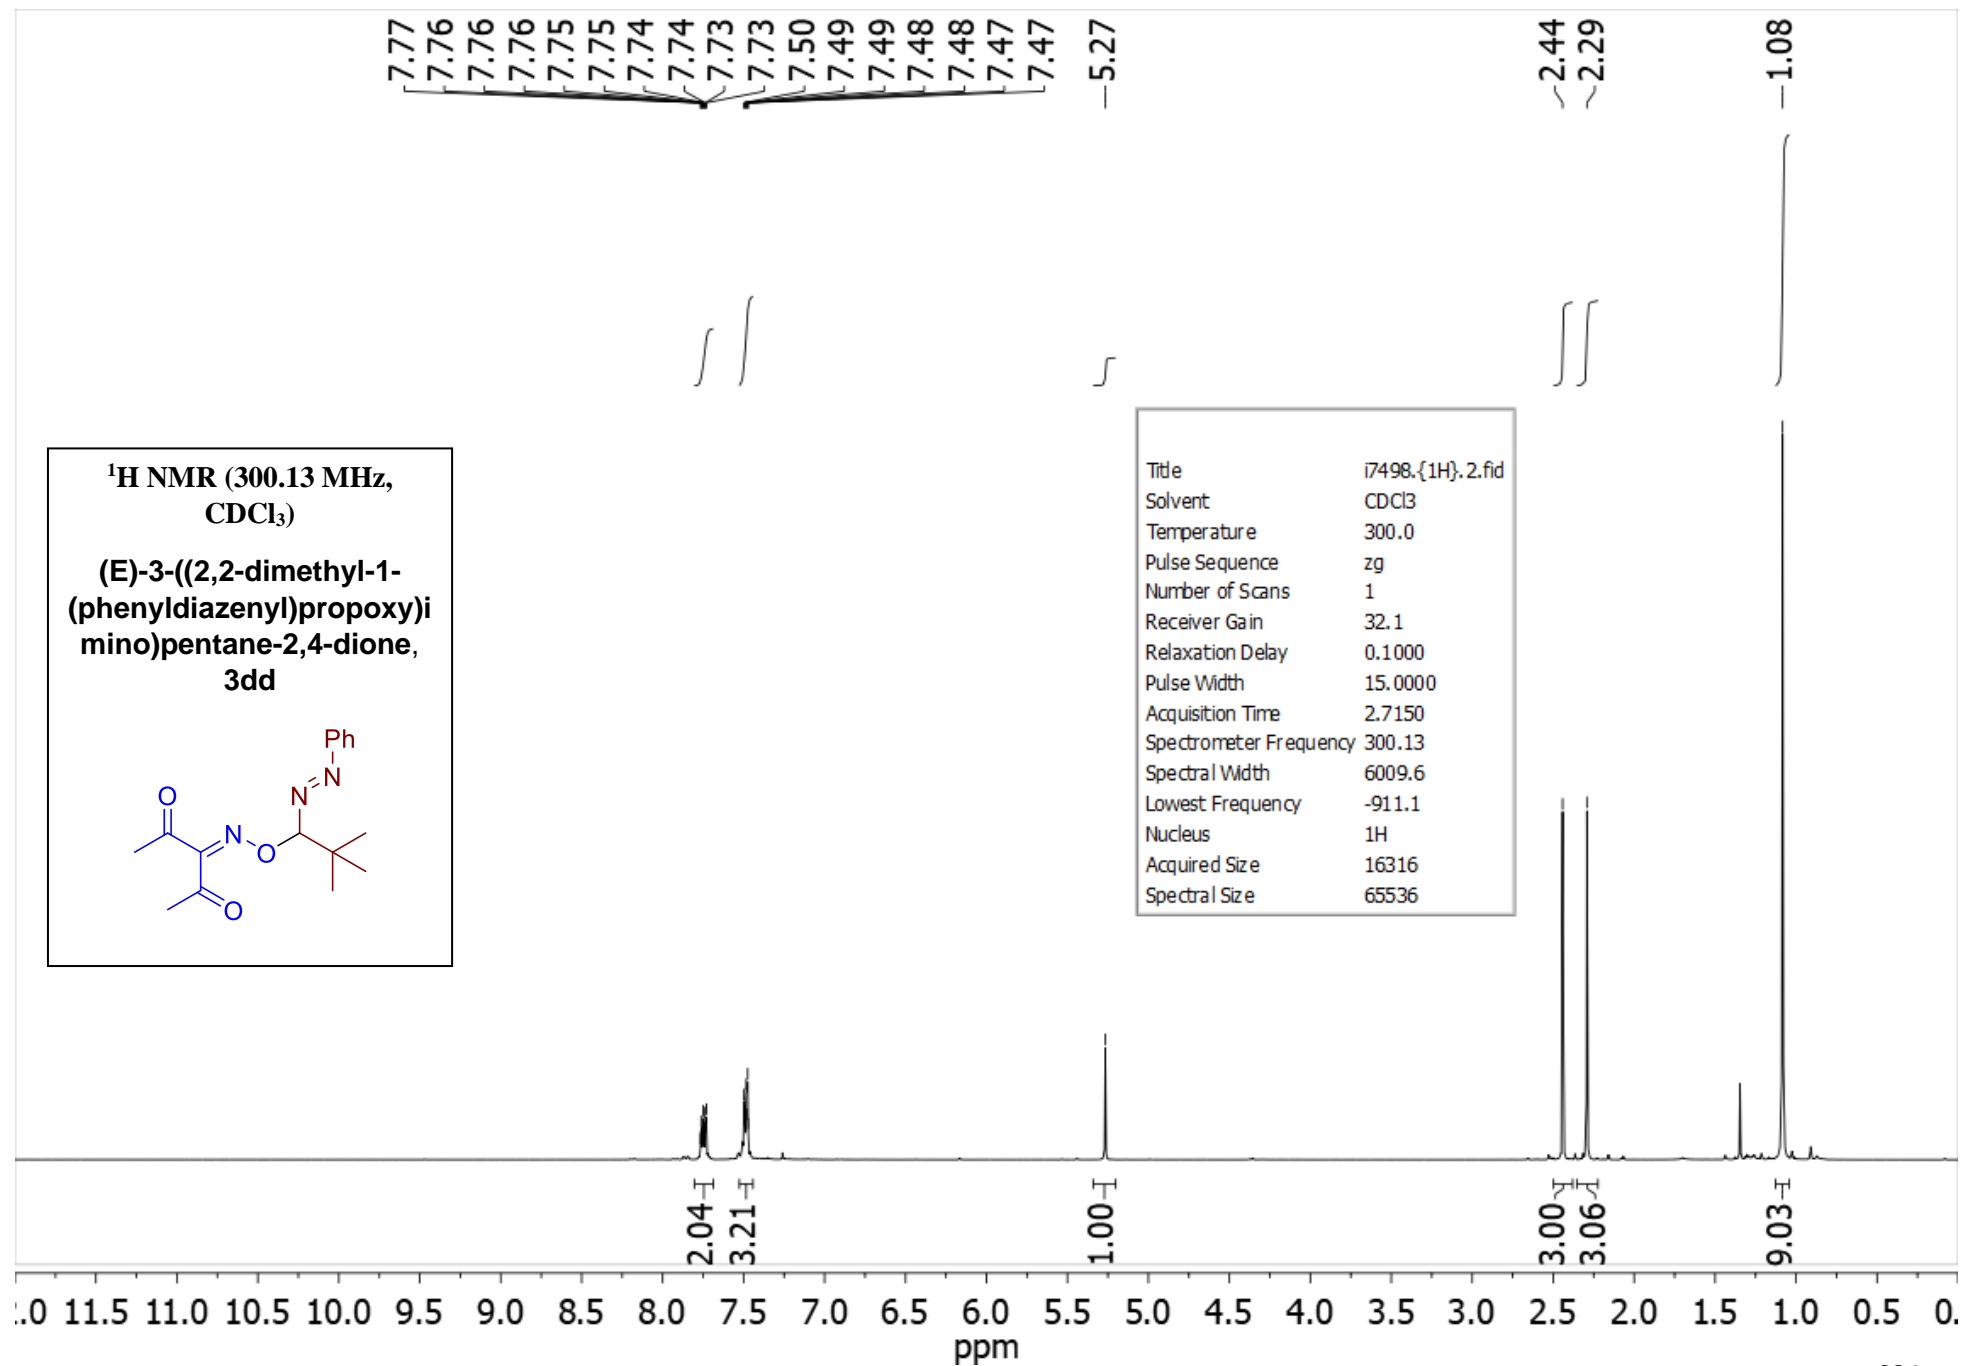

<sup>13</sup>C NMR (75.47 MHz,  
CDCl<sub>3</sub>)  
(E)-3-((2,2-dimethyl-1-  
(phenyldiazenyl)propoxy)i  
mino)pentane-2,4-dione,  
3dd

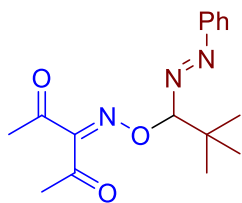

|                        |                    |
|------------------------|--------------------|
| Title                  | i7498.{13C}.13.fid |
| Solvent                | CDCl <sub>3</sub>  |
| Temperature            | 301.9              |
| Pulse Sequence         | zgpg30             |
| Number of Scans        | 1024               |
| Receiver Gain          | 40.3               |
| Relaxation Delay       | 1.0000             |
| Pulse Width            | 13.0000            |
| Acquisition Time       | 0.9002             |
| Spectrometer Frequency | 75.48              |
| Spectral Width         | 18115.9            |
| Lowest Frequency       | -745.1             |
| Nucleus                | 13C                |
| Acquired Size          | 16308              |
| Spectral Size          | 65536              |

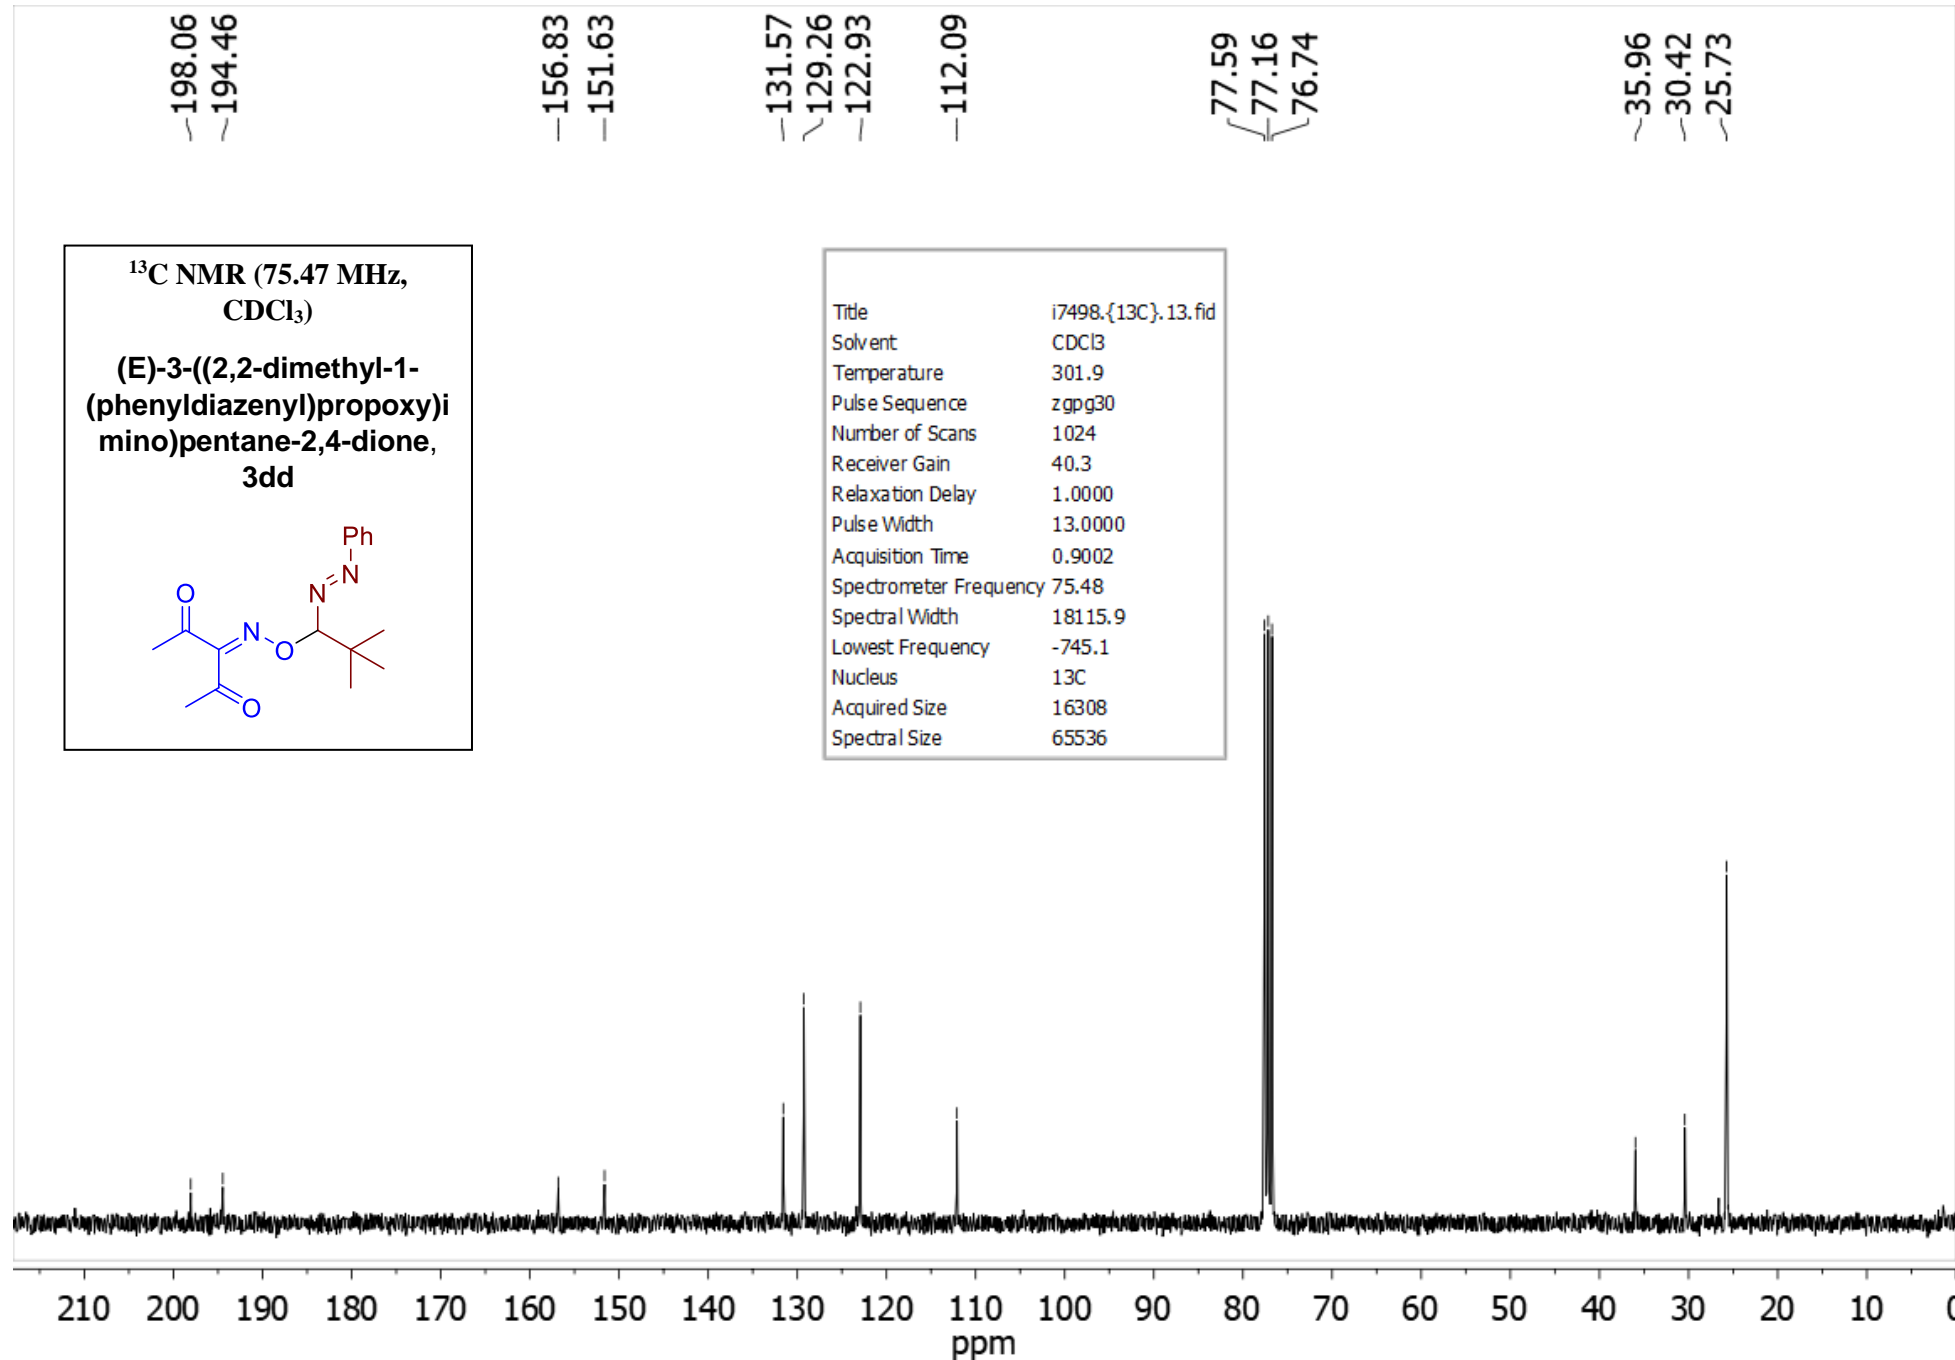

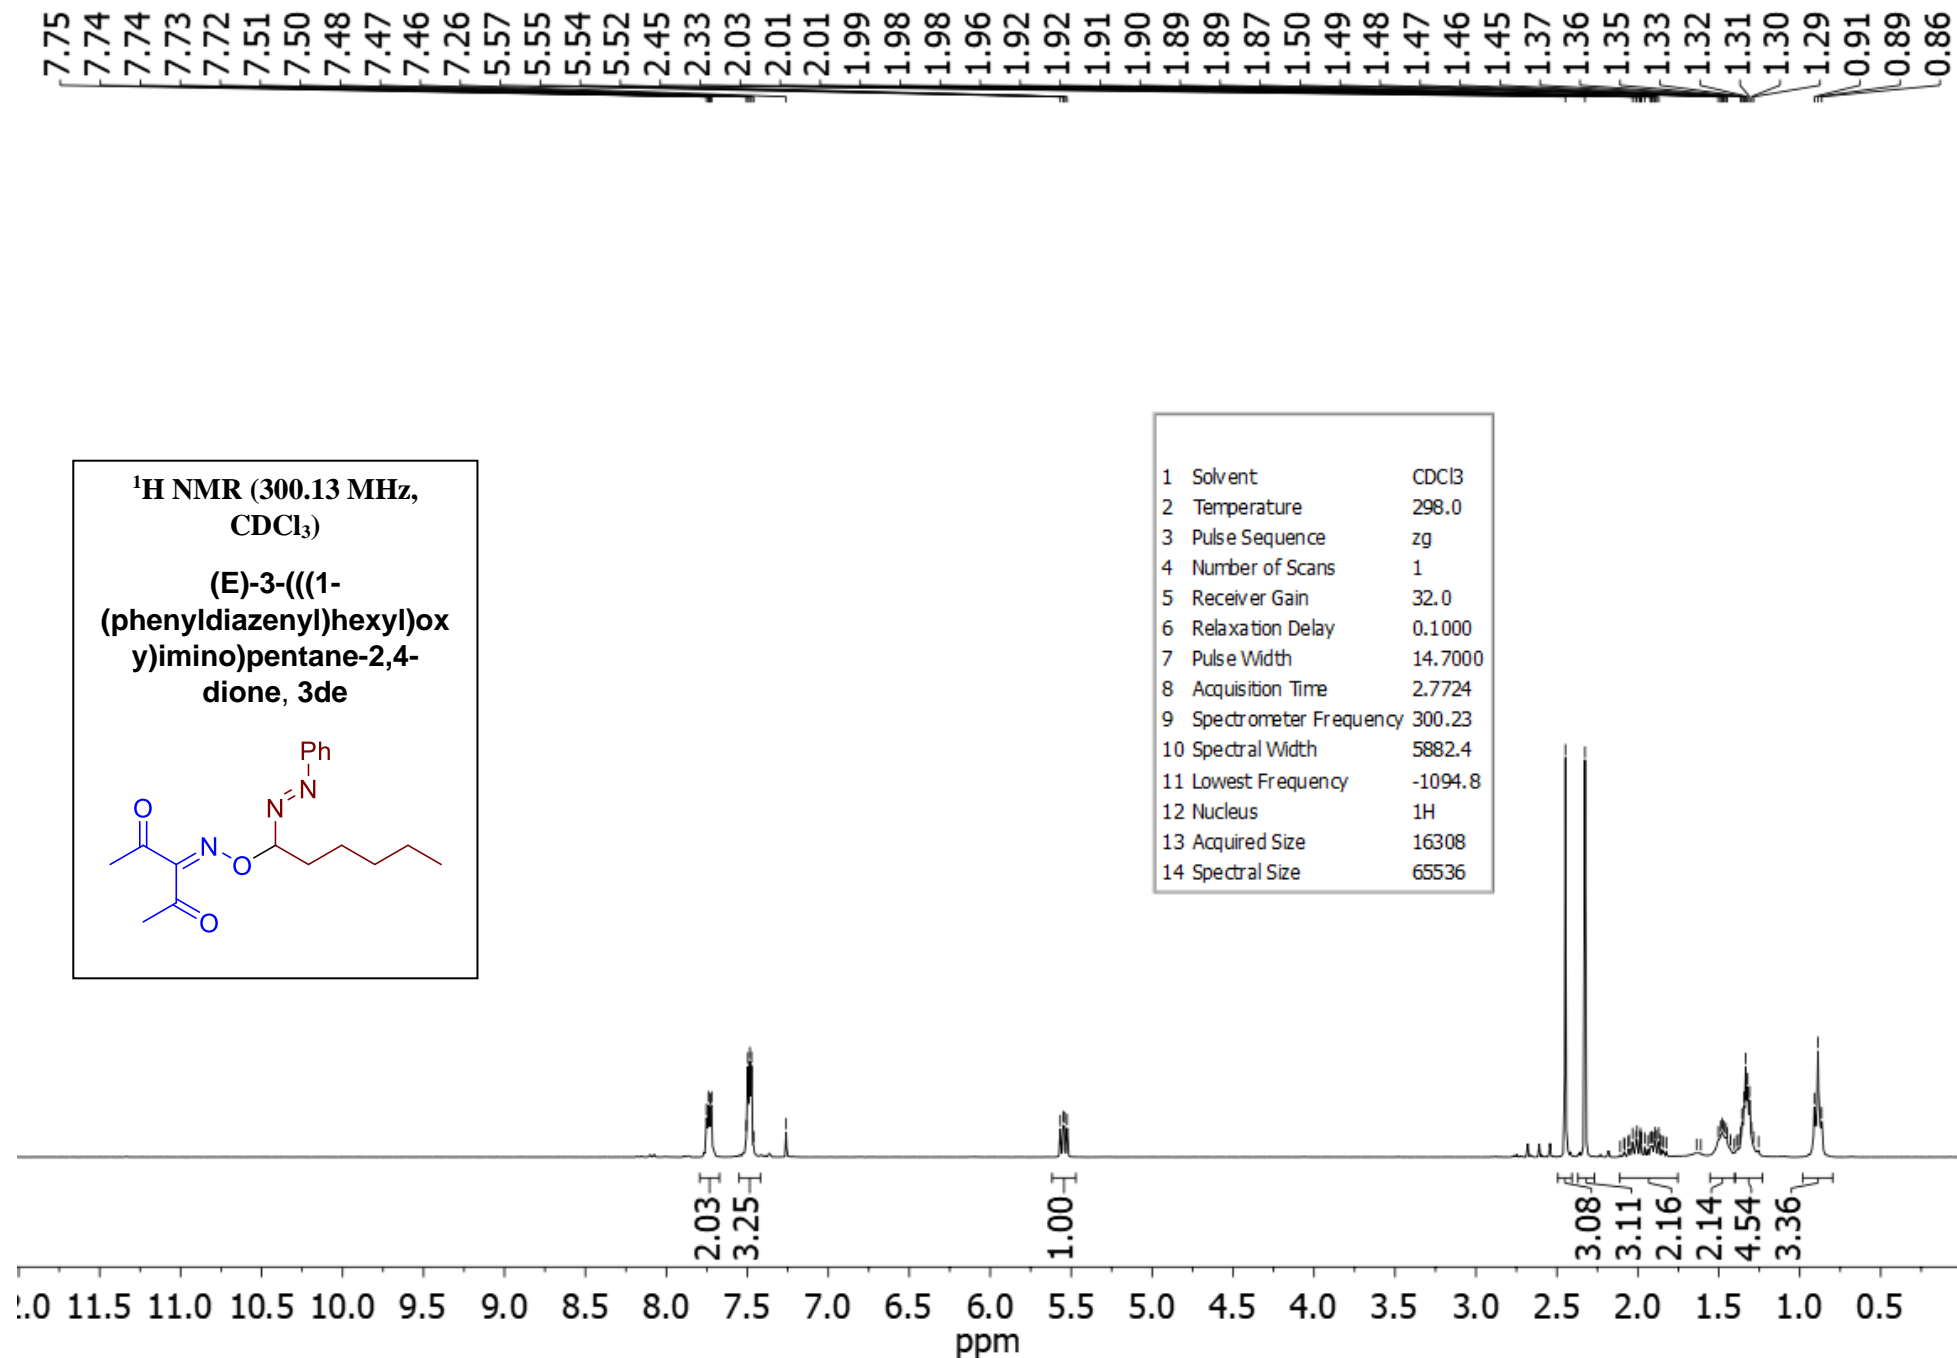

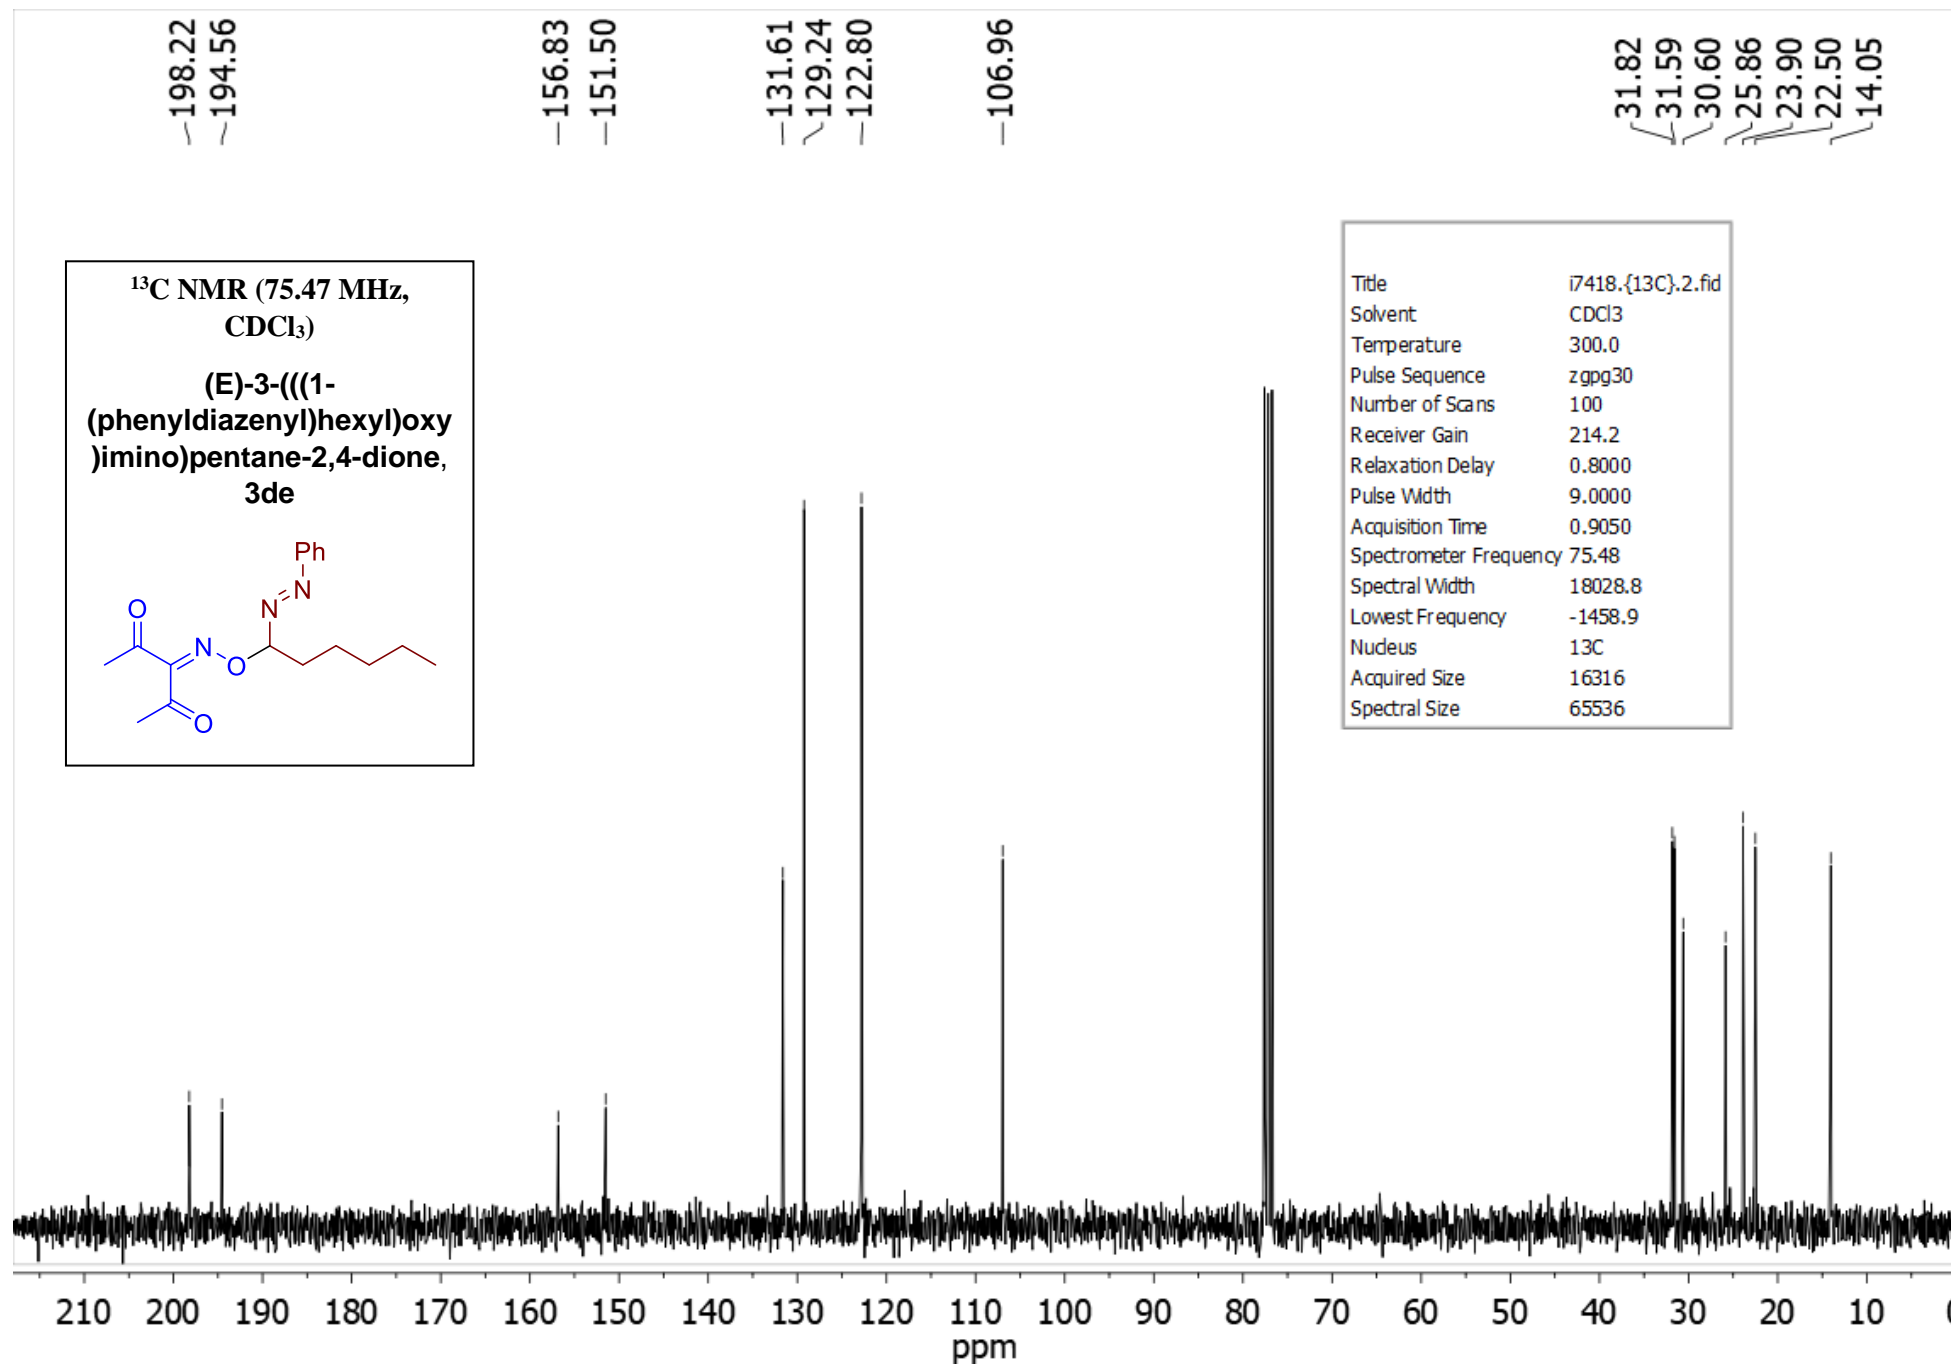

Supplement: s1 [file s1]
